# Supplementary material for: Cell Type-Specific Predictive Models Perform Prioritization of Genes and Gene Sets Associated With Autism
Source: Front Genet. 2021 Jan 15;11:628539. doi: 10.3389/fgene.2020.628539 (PMC7844401; doi:10.3389/fgene.2020.628539)
Supplement: Supplementary File 1 — The performances of cell type-specific predictive models built based on all genes, top 500, 1000, and 1500 important genes, RFE genes, edgeR genes, and Velmeshev’s genes. [file Table_1.XLSX]

## Sheet: All genes
Cell Cluster	Training set						Test set
	ASD/Control	ACC	SN	SP	AUC	Cutoff	ASD/Control	ACC	SN	SP	AUC
AST-FB	1424/1136	0.91	0.92	0.9	0.97	0.51	609/486	0.72	0.78	0.63	0.79
AST-PP	3325/1636	0.93	0.93	0.93	0.98	0.53	1424/700	0.84	0.87	0.79	0.9
Endothelial	595/799	0.92	0.91	0.92	0.97	0.5	255/342	0.76	0.7	0.8	0.83
IN-PV	1268/1336	0.95	0.94	0.96	0.99	0.5	543/572	0.8	0.77	0.82	0.88
IN-SST	1362/1572	0.94	0.92	0.95	0.98	0.5	583/673	0.76	0.7	0.81	0.83
IN-SV2C	693/593	0.98	0.98	0.97	1	0.51	297/253	0.8	0.83	0.76	0.88
IN-VIP	2169/1767	0.89	0.88	0.91	0.96	0.52	929/756	0.79	0.79	0.78	0.86
L2/3	4874/4084	0.95	0.95	0.95	0.99	0.5	2088/1749	0.89	0.9	0.88	0.96
L4	2391/2173	0.93	0.91	0.94	0.98	0.51	1024/930	0.83	0.8	0.87	0.91
L5/6	1197/1185	0.93	0.93	0.93	0.98	0.5	513/507	0.78	0.77	0.8	0.86
L5/6-CC	1596/1475	0.97	0.98	0.97	1	0.5	683/631	0.85	0.88	0.82	0.93
Microglia	822/925	0.91	0.9	0.93	0.97	0.5	352/396	0.76	0.73	0.78	0.84
Neu-mat	1298/1176	0.85	0.82	0.88	0.93	0.53	555/503	0.75	0.7	0.8	0.83
Neu-NRGN-I	225/188	0.97	0.99	0.94	0.99	0.49	96/80	0.69	0.75	0.63	0.74
Neu-NRGN-II	580/442	0.82	0.86	0.78	0.89	0.51	248/189	0.63	0.7	0.53	0.68
Oligodendrocytes	3211/5334	0.83	0.86	0.81	0.91	0.45	1376/2285	0.77	0.79	0.75	0.85
OPC	3560/3194	0.83	0.82	0.84	0.91	0.52	1525/1368	0.75	0.74	0.76	0.82

## Sheet: Top 500 genes
Cell Cluster	Training set						Test set
	ASD/Control	ACC	SN	SP	AUC	Cutoff	ASD/Control	ACC	SN	SP	AUC
AST-FB	1424/1136	0.89	0.88	0.9	0.96	0.52	609/486	0.68	0.69	0.65	0.75
AST-PP	3325/1636	0.9	0.91	0.88	0.96	0.53	1424/700	0.81	0.85	0.75	0.89
Endothelial	595/799	0.91	0.91	0.9	0.97	0.49	255/342	0.72	0.68	0.75	0.81
IN-PV	1268/1336	0.9	0.91	0.9	0.96	0.5	543/572	0.78	0.77	0.79	0.85
IN-SST	1362/1572	0.9	0.9	0.89	0.96	0.48	583/673	0.73	0.72	0.73	0.81
IN-SV2C	693/593	0.95	0.95	0.96	0.99	0.51	297/253	0.75	0.74	0.77	0.84
IN-VIP	2169/1767	0.87	0.87	0.87	0.94	0.51	929/756	0.77	0.78	0.75	0.85
L2/3	4874/4084	0.91	0.91	0.9	0.97	0.5	2088/1749	0.87	0.88	0.86	0.94
L4	2391/2173	0.9	0.89	0.91	0.96	0.5	1024/930	0.81	0.79	0.83	0.89
L5/6	1197/1185	0.91	0.89	0.93	0.97	0.52	513/507	0.77	0.73	0.82	0.84
L5/6-CC	1596/1475	0.93	0.93	0.93	0.98	0.5	683/631	0.84	0.86	0.82	0.91
Microglia	822/925	0.9	0.92	0.89	0.97	0.48	352/396	0.72	0.74	0.71	0.81
Neu-mat	1298/1176	0.87	0.88	0.86	0.94	0.5	555/503	0.73	0.74	0.72	0.8
Neu-NRGN-I	225/188	0.98	1	0.96	1	0.5	96/80	0.6	0.59	0.6	0.68
Neu-NRGN-II	580/442	0.92	0.93	0.91	0.98	0.51	248/189	0.59	0.59	0.59	0.64
Oligodendrocytes	3211/5334	0.82	0.85	0.8	0.9	0.46	1376/2285	0.77	0.8	0.75	0.85
OPC	3560/3194	0.81	0.83	0.8	0.89	0.51	1525/1368	0.74	0.77	0.71	0.81

## Sheet: Top 1000 genes
Cell Cluster	Training set						Test set
	ASD/Control	ACC	SN	SP	AUC	Cutoff	ASD/Control	ACC	SN	SP	AUC
AST-FB	1424/1136	0.93	0.92	0.93	0.98	0.51	609/486	0.67	0.7	0.64	0.74
AST-PP	3325/1636	0.91	0.91	0.9	0.97	0.53	1424/700	0.83	0.84	0.8	0.9
Endothelial	595/799	0.93	0.94	0.92	0.98	0.49	255/342	0.74	0.72	0.75	0.82
IN-PV	1268/1336	0.94	0.94	0.94	0.98	0.5	543/572	0.8	0.78	0.82	0.87
IN-SST	1362/1572	0.94	0.92	0.95	0.98	0.51	583/673	0.73	0.68	0.77	0.81
IN-SV2C	693/593	0.98	0.99	0.97	1	0.5	297/253	0.78	0.78	0.78	0.86
IN-VIP	2169/1767	0.88	0.88	0.89	0.95	0.52	929/756	0.77	0.78	0.77	0.86
L2/3	4874/4084	0.93	0.93	0.93	0.98	0.5	2088/1749	0.88	0.89	0.88	0.95
L4	2391/2173	0.92	0.92	0.91	0.97	0.49	1024/930	0.83	0.84	0.83	0.91
L5/6	1197/1185	0.94	0.95	0.94	0.98	0.49	513/507	0.8	0.8	0.8	0.86
L5/6-CC	1596/1475	0.96	0.96	0.96	0.99	0.5	683/631	0.85	0.87	0.83	0.92
Microglia	822/925	0.94	0.93	0.95	0.99	0.5	352/396	0.73	0.71	0.74	0.8
Neu-mat	1298/1176	0.91	0.92	0.9	0.97	0.5	555/503	0.73	0.73	0.74	0.8
Neu-NRGN-I	225/188	0.99	0.99	0.99	1	0.54	96/80	0.6	0.56	0.65	0.69
Neu-NRGN-II	580/442	0.96	0.95	0.97	0.99	0.51	248/189	0.59	0.65	0.51	0.63
Oligodendrocytes	3211/5334	0.85	0.86	0.85	0.93	0.47	1376/2285	0.77	0.76	0.77	0.85
OPC	3560/3194	0.85	0.88	0.83	0.93	0.5	1525/1368	0.73	0.77	0.68	0.8

## Sheet: Top 1500 genes
Cell Cluster	Training set						Test set
	ASD/Control	ACC	SN	SP	AUC	Cutoff	ASD/Control	ACC	SN	SP	AUC
AST-FB	1424/1136	0.95	0.95	0.95	0.99	0.52	609/486	0.67	0.7	0.64	0.74
AST-PP	3325/1636	0.91	0.92	0.91	0.97	0.53	1424/700	0.83	0.86	0.77	0.9
Endothelial	595/799	0.93	0.97	0.91	0.98	0.48	255/342	0.75	0.75	0.75	0.82
IN-PV	1268/1336	0.95	0.93	0.97	0.99	0.52	543/572	0.81	0.74	0.87	0.87
IN-SST	1362/1572	0.96	0.94	0.97	0.99	0.51	583/673	0.72	0.66	0.77	0.8
IN-SV2C	693/593	0.97	0.97	0.98	1	0.51	297/253	0.79	0.81	0.77	0.87
IN-VIP	2169/1767	0.89	0.89	0.9	0.96	0.52	929/756	0.78	0.79	0.77	0.86
L2/3	4874/4084	0.95	0.95	0.95	0.99	0.51	2088/1749	0.88	0.88	0.88	0.95
L4	2391/2173	0.93	0.93	0.93	0.98	0.49	1024/930	0.83	0.84	0.82	0.91
L5/6	1197/1185	0.96	0.95	0.97	0.99	0.51	513/507	0.79	0.76	0.82	0.86
L5/6-CC	1596/1475	0.98	0.98	0.98	1	0.5	683/631	0.84	0.85	0.83	0.92
Microglia	822/925	0.96	0.98	0.95	0.99	0.48	352/396	0.73	0.76	0.7	0.81
Neu-mat	1298/1176	0.9	0.9	0.9	0.96	0.51	555/503	0.73	0.71	0.77	0.81
Neu-NRGN-I	225/188	1	1	0.99	1	0.55	96/80	0.6	0.54	0.68	0.69
Neu-NRGN-II	580/442	0.99	0.99	0.98	1	0.5	248/189	0.61	0.66	0.54	0.63
Oligodendrocytes	3211/5334	0.87	0.89	0.86	0.95	0.47	1376/2285	0.76	0.75	0.76	0.83
OPC	3560/3194	0.84	0.84	0.84	0.92	0.51	1525/1368	0.74	0.76	0.72	0.81

## Sheet: RFE genes
Cell Cluster	Number of RFE genes	Training set						Test set
		ASD/Control	ACC	SN	SP	AUC	Cutoff	ASD/Control	ACC	SN	SP	AUC
AST-FB	200	1424/1136	0.8	0.77	0.84	0.88	0.54	609/486	0.69	0.68	0.71	0.75
AST-PP	1000	3325/1636	0.9	0.91	0.9	0.96	0.53	1424/700	0.83	0.85	0.8	0.9
Endothelial	500	595/799	0.91	0.9	0.92	0.96	0.51	255/342	0.72	0.65	0.77	0.81
IN-PV	1000	1268/1336	0.94	0.93	0.94	0.98	0.5	543/572	0.8	0.78	0.82	0.87
IN-SST	1000	1362/1572	0.91	0.9	0.92	0.97	0.49	583/673	0.75	0.72	0.77	0.82
IN-SV2C	900	693/593	0.98	0.99	0.96	1	0.51	297/253	0.77	0.77	0.77	0.86
IN-VIP	1000	2169/1767	0.88	0.86	0.9	0.95	0.53	929/756	0.78	0.76	0.79	0.86
L2/3	1000	4874/4084	0.93	0.93	0.93	0.98	0.51	2088/1749	0.88	0.88	0.89	0.95
L4	1000	2391/2173	0.91	0.89	0.94	0.97	0.51	1024/930	0.83	0.79	0.87	0.91
L5/6	900	1197/1185	0.94	0.95	0.92	0.98	0.49	513/507	0.79	0.81	0.78	0.86
L5/6-CC	1000	1596/1475	0.96	0.96	0.96	0.99	0.5	683/631	0.85	0.85	0.85	0.92
Microglia	200	822/925	0.85	0.84	0.86	0.92	0.49	352/396	0.72	0.7	0.74	0.81
Neu-mat	900	1298/1176	0.9	0.89	0.92	0.97	0.52	555/503	0.73	0.69	0.78	0.8
Neu-NRGN-I	100	225/188	0.87	0.84	0.89	0.93	0.53	96/80	0.66	0.56	0.78	0.72
Neu-NRGN-II	100	580/442	0.77	0.8	0.72	0.84	0.51	248/189	0.61	0.64	0.58	0.66
Oligodendrocytes	600	3211/5334	0.83	0.82	0.83	0.91	0.47	1376/2285	0.77	0.76	0.78	0.85
OPC	900	3560/3194	0.84	0.86	0.83	0.92	0.51	1525/1368	0.73	0.75	0.71	0.8

## Sheet: edgeR genes
Cell Cluster	Number of edgeR genes	Training set						Test set
		ASD/Control	ACC	SN	SP	AUC	Cutoff	ASD/Control	ACC	SN	SP	AUC
AST-FB	257	1424/1136	0.81	0.81	0.8	0.89	0.52	609/486	0.71	0.75	0.65	0.77
AST-PP	1464	3325/1636	0.88	0.88	0.88	0.95	0.54	1424/700	0.83	0.85	0.79	0.9
Endothelial	146	595/799	0.83	0.84	0.82	0.91	0.48	255/342	0.71	0.73	0.7	0.77
IN-PV	695	1268/1336	0.86	0.89	0.83	0.94	0.48	543/572	0.79	0.79	0.79	0.86
IN-SST	1346	1362/1572	0.84	0.8	0.87	0.92	0.51	583/673	0.72	0.7	0.74	0.79
IN-SV2C	616	693/593	0.85	0.82	0.88	0.93	0.53	297/253	0.75	0.73	0.77	0.82
IN-VIP	1820	2169/1767	0.85	0.84	0.87	0.92	0.53	929/756	0.76	0.75	0.76	0.84
L2/3	4690	4874/4084	0.93	0.92	0.94	0.98	0.51	2088/1749	0.88	0.87	0.89	0.95
L4	2477	2391/2173	0.9	0.89	0.91	0.96	0.5	1024/930	0.83	0.82	0.84	0.9
L5/6	1069	1197/1185	0.85	0.85	0.85	0.92	0.49	513/507	0.74	0.74	0.74	0.81
L5/6-CC	3183	1596/1475	0.93	0.93	0.92	0.98	0.5	683/631	0.84	0.85	0.84	0.91
Microglia	106	822/925	0.78	0.8	0.77	0.87	0.48	352/396	0.7	0.72	0.67	0.78
Neu-mat	476	1298/1176	0.82	0.82	0.82	0.9	0.51	555/503	0.72	0.7	0.74	0.8
Neu-NRGN-I	2	225/188	0.62	0.96	0.2	0.61	0.48	96/80	0.62	0.97	0.2	0.61
Neu-NRGN-II	8	580/442	0.64	0.52	0.78	0.71	0.55	248/189	0.57	0.45	0.73	0.63
Oligodendrocytes	1420	3211/5334	0.84	0.87	0.83	0.92	0.46	1376/2285	0.74	0.74	0.74	0.81
OPC	1413	3560/3194	0.8	0.8	0.79	0.87	0.51	1525/1368	0.72	0.73	0.71	0.8

## Sheet: Velmeshev’s genes
Cell Cluster	Number of Velmeshev’s genes	Training set						Test set
		ASD/Control	ACC	SN	SP	AUC	Cutoff	ASD/Control	ACC	SN	SP	AUC
AST-FB	11	1424/1136	0.59	0.55	0.63	0.62	0.53	609/486	0.57	0.53	0.63	0.6
AST-PP	36	3325/1636	0.61	0.55	0.72	0.69	0.59	1424/700	0.61	0.56	0.72	0.69
Endothelial	38	595/799	0.67	0.75	0.6	0.72	0.46	255/342	0.63	0.73	0.55	0.7
IN-PV	14	1268/1336	0.64	0.72	0.56	0.67	0.48	543/572	0.61	0.67	0.56	0.64
IN-SST	17	1362/1572	0.62	0.63	0.61	0.66	0.48	583/673	0.6	0.58	0.62	0.62
IN-SV2C	9	693/593	0.65	0.74	0.55	0.7	0.5	297/253	0.65	0.74	0.55	0.68
IN-VIP	32	2169/1767	0.68	0.67	0.68	0.73	0.53	929/756	0.65	0.66	0.65	0.71
L2_3	41	4874/4084	0.75	0.73	0.78	0.83	0.53	2088/1749	0.73	0.71	0.77	0.81
L4	42	2391/2173	0.71	0.68	0.75	0.78	0.52	1024/930	0.7	0.66	0.75	0.76
L5_6	5	1197/1185	0.58	0.46	0.7	0.61	0.52	513/507	0.57	0.45	0.69	0.6
L5_6-CC	7	1596/1475	0.61	0.66	0.57	0.65	0.5	683/631	0.6	0.66	0.53	0.64
Microglia	49	822/925	0.7	0.76	0.65	0.77	0.48	352/396	0.68	0.74	0.62	0.74
Neu-mat	1	1298/1176	0.55	0.34	0.78	0.56	0.51	555/503	0.57	0.39	0.76	0.57
Neu-NRGN-I	6	225/188	0.65	0.87	0.39	0.67	0.47	96/80	0.61	0.76	0.43	0.58
Neu-NRGN-II	4	580/442	0.56	0.57	0.55	0.57	0.53	248/189	0.52	0.5	0.54	0.53
Oligodendrocytes	14	3211/5334	0.64	0.59	0.66	0.67	0.45	1376/2285	0.66	0.63	0.67	0.7
OPC	3	3560/3194	0.58	0.65	0.51	0.61	0.51	1525/1368	0.58	0.66	0.5	0.6
