# Supplementary material for: Cell Type-Specific Predictive Models Perform Prioritization of Genes and Gene Sets Associated With Autism
Source: Front Genet. 2021 Jan 15;11:628539. doi: 10.3389/fgene.2020.628539 (PMC7844401; doi:10.3389/fgene.2020.628539)
Supplement: Supplementary File 6 — The enriched GO terms for genes with averaged importance >10% included in the identified ASD-associated cell type-specific gene sets. [file Table_6.XLSX]

## Sheet: AST-PP
ONTOLOGY	ID	Description	GeneRatio	BgRatio	pvalue	p.adjust	qvalue	geneID	Count
BP	GO:0007167	enzyme linked receptor protein signaling pathway	124/442	467/5658	9.15193e-39	3.72026e-35	2.21766e-35	HSPA1A/HSPB1/HSP90AA1/MT3/FGFR2/STMN1/FOS/PRKCA/APOD/PTPRD/NR4A3/APC/PDGFRB/LDLRAD4/PTN/MYO1E/AGT/DOCK1/BMPR1B/HES5/LRP1/SMURF2/BMPR1A/MPZL1/RBPMS/PRDM16/ACTG1/GAB2/EPHA6/FYN/ZFYVE16/F3/FGF2/CCND3/SULF1/PHIP/LTBP1/TOB1/CDH13/VAV3/NRP1/SOX9/PIK3C2A/ZNF423/PML/JUN/CD63/GAB1/PTPRJ/DDX5/ZEB1/DNM2/GFRA1/HNRNPM/EFEMP1/FGFR3/TGFB2/UBB/SMARCC1/RPS27A/KANK1/STAT3/FGF1/EGR1/NEO1/PTPRG/WASF2/ANGPT1/UBASH3B/…	124
BP	GO:0007169	transmembrane receptor protein tyrosine kinase signaling pathway	84/442	320/5658	2.76788e-25	5.62571e-22	3.3535e-22	HSPB1/HSP90AA1/MT3/FGFR2/STMN1/PRKCA/APOD/NR4A3/APC/PDGFRB/MYO1E/AGT/DOCK1/LRP1/MPZL1/ACTG1/GAB2/EPHA6/FYN/F3/FGF2/CCND3/SULF1/PHIP/CDH13/VAV3/NRP1/SOX9/PIK3C2A/CD63/GAB1/PTPRJ/GFRA1/HNRNPM/EFEMP1/FGFR3/SMARCC1/KANK1/STAT3/FGF1/PTPRG/WASF2/ANGPT1/UBASH3B/ACTB/SORL1/FGF12/TSC2/RPS6KA5/PLCE1/SOCS3/FOXO1/PTPRT/RBPJ/ABI1/HIP1R/SORBS1/EPHB1/DDR2/NRG1/HIF1A/ITGAV/ATP6V0E1/MERTK/DDIT4/VAV2/HIP1/POLR2L/T…	84
BP	GO:0010562	positive regulation of phosphorus metabolic process	105/442	490/5658	6.19668e-24	6.29737e-21	3.75388e-21	APOE/HSP90AA1/MT3/FGFR2/TMSB4X/PRKCA/MMD2/CLU/PDGFRB/CCK/MAP4K4/DLC1/STK3/ENO1/AGT/GADD45B/AKAP13/HES5/LRP1/BMPR1A/RBPMS/MINK1/CHI3L1/TAOK3/CCL2/MAP3K5/FYN/TNIK/FGF2/CCND3/VAV3/TNK2/DAB1/NRP1/SOX9/JUN/SLC27A1/PSAP/PTPRJ/FAS/PRNP/DSCAM/FGFR3/TGFB2/UBB/RPS27A/CCNY/STAT3/FGF1/EGR1/RAP1B/ANGPT1/SPAG9/ADCY8/GPR37L1/RPS6KA5/MAP3K14/RGN/PLCE1/SOCS3/ABI1/IL6ST/PPARGC1A/DDR2/ITGA6/SH3RF1/NRG1/KSR1/GPRC5B/…	105
BP	GO:0045937	positive regulation of phosphate metabolic process	105/442	490/5658	6.19668e-24	6.29737e-21	3.75388e-21	APOE/HSP90AA1/MT3/FGFR2/TMSB4X/PRKCA/MMD2/CLU/PDGFRB/CCK/MAP4K4/DLC1/STK3/ENO1/AGT/GADD45B/AKAP13/HES5/LRP1/BMPR1A/RBPMS/MINK1/CHI3L1/TAOK3/CCL2/MAP3K5/FYN/TNIK/FGF2/CCND3/VAV3/TNK2/DAB1/NRP1/SOX9/JUN/SLC27A1/PSAP/PTPRJ/FAS/PRNP/DSCAM/FGFR3/TGFB2/UBB/RPS27A/CCNY/STAT3/FGF1/EGR1/RAP1B/ANGPT1/SPAG9/ADCY8/GPR37L1/RPS6KA5/MAP3K14/RGN/PLCE1/SOCS3/ABI1/IL6ST/PPARGC1A/DDR2/ITGA6/SH3RF1/NRG1/KSR1/GPRC5B/…	105
BP	GO:0032989	cellular component morphogenesis	102/442	492/5658	4.92028e-22	4.00019e-19	2.38452e-19	APOE/HSP90AA1/MT3/ID2/FGFR2/GJA1/STMN1/PRKCA/CLU/PTPRD/NR4A3/PTPRZ1/PDGFRB/NRXN3/CCK/MAP4K4/PREX2/SEMA5A/DLC1/PTN/CFL1/NR4A2/NLGN1/IL1RAPL1/DOCK1/LIMS1/AKAP13/BMPR1B/LRP1/ANTXR1/PMP22/ACTG1/MINK1/GAB2/CUX1/CCL2/EPHA6/FYN/TNIK/GLI2/PREX1/PHIP/TUBB2B/CDH13/DAB1/NRP1/FN1/GAB1/CD9/SEMA3E/DNM2/GFRA1/MSN/LAMA1/DSCAM/TGFB2/MYO10/UBB/KANK1/NEO1/SYT1/WASF2/OPHN1/CSNK1A1/ACTB/RPS6KA5/S100B/PARD3/ADAM10/ABI…	102
BP	GO:0042327	positive regulation of phosphorylation	97/442	459/5658	1.50501e-21	1.01964e-18	6.07813e-19	APOE/HSP90AA1/MT3/FGFR2/PRKCA/MMD2/CLU/PDGFRB/CCK/MAP4K4/STK3/AGT/GADD45B/AKAP13/HES5/LRP1/BMPR1A/RBPMS/MINK1/CHI3L1/TAOK3/CCL2/MAP3K5/FYN/TNIK/FGF2/CCND3/VAV3/TNK2/DAB1/NRP1/SOX9/JUN/SLC27A1/PSAP/PTPRJ/FAS/PRNP/DSCAM/FGFR3/TGFB2/UBB/RPS27A/CCNY/STAT3/FGF1/EGR1/RAP1B/ANGPT1/SPAG9/ADCY8/GPR37L1/RPS6KA5/MAP3K14/PLCE1/SOCS3/ABI1/IL6ST/DDR2/ITGA6/SH3RF1/NRG1/KSR1/GPRC5B/HIF1A/SASH1/HIPK2/NEDD9/UBC/AT…	97
BP	GO:0008285	negative regulation of cell proliferation	80/442	334/5658	2.82032e-21	1.6378e-18	9.76296e-19	HSPA1A/APOE/HSPA1B/ID2/FGFR2/GJA1/APOD/APC/DLC1/PTN/STK3/TOB2/BMPR1B/PMP22/CCL2/DUSP1/SULF1/TOB1/PRKG1/CTNNA1/CDH13/WDR6/SERPINE2/SOX9/B2M/PML/JUN/RPS6KA2/CD9/MCC/CASK/PTPRJ/ZEB1/PRNP/TGFB2/NDRG1/STAT3/SST/INTU/TSC2/NDRG2/WFDC1/RGN/JARID2/SF1/RBPJ/ABI1/PPARGC1A/EPHB1/CDC73/MEF2C/CAMK2N1/PTPRM/SDC4/ZBTB7C/ATM/STAT1/IFIT3/DACH1/DLG1/DICER1/CGRRF1/APPL2/NFIB/RERG/EAF2/BCL6/ST18/ASPH/KAT2B/TGFB3/PKD2…	80
BP	GO:0000902	cell morphogenesis	96/442	456/5658	3.43356e-21	1.74468e-18	1.04001e-18	APOE/HSP90AA1/MT3/ID2/FGFR2/GJA1/STMN1/PRKCA/CLU/PTPRD/NR4A3/PTPRZ1/NRXN3/CCK/MAP4K4/PREX2/SEMA5A/DLC1/PTN/CFL1/NR4A2/NLGN1/IL1RAPL1/DOCK1/LIMS1/BMPR1B/LRP1/ANTXR1/MINK1/GAB2/CUX1/CCL2/EPHA6/FYN/TNIK/GLI2/PREX1/PHIP/TUBB2B/CDH13/DAB1/NRP1/FN1/GAB1/SEMA3E/DNM2/GFRA1/MSN/LAMA1/DSCAM/TGFB2/MYO10/UBB/KANK1/NEO1/SYT1/WASF2/OPHN1/CSNK1A1/ACTB/RPS6KA5/S100B/PARD3/ADAM10/ABI1/EPHB1/LHX2/LGI1/NRXN1/ID1/NR…	96
BP	GO:0051345	positive regulation of hydrolase activity	81/442	346/5658	7.29597e-21	3.29535e-18	1.96436e-18	HSPA1A/FGFR2/TMSB4X/PDGFRB/CCK/MAP4K4/DOCK4/DNAJB1/PREX2/PLSCR1/DLC1/ALDH1A1/ARHGEF10/AGT/DOCK1/LIMS1/GABARAPL2/RALGAPA2/AGAP1/ANTXR1/CCL2/MAP3K5/RGS20/RIN2/TBC1D22A/FYN/F3/FGF2/PREX1/VAV3/RGS6/NRP1/FN1/ARHGAP24/PML/JUN/PSAP/FAS/SRGAP1/DNM2/GSN/FGFR3/STAT3/OPHN1/GDI2/MBP/EGLN3/TSC2/CRADD/RGS16/RGN/ARHGAP31/HIP1R/ITGA6/ARHGAP29/ASAP2/MEF2C/NEDD9/SIPA1L2/ARHGAP21/HIP1/CHN2/GNAO1/SIPA1L3/S1PR1/ARHGA…	81
BP	GO:0031175	neuron projection development	87/442	399/5658	3.25594e-20	1.32354e-17	7.88966e-18	APOE/HSP90AA1/MT3/FGFR2/GJA1/STMN1/PRKCA/APOD/PTPRD/NR4A3/PTPRZ1/NRXN3/CCK/MAP4K4/PREX2/SEMA5A/PTN/CFL1/CD38/NR4A2/NLGN1/AGT/TNC/IL1RAPL1/BMPR1B/HES5/LRP1/PMP22/MINK1/GAB2/CUX1/EPHA6/FYN/TNIK/GLI2/PREX1/PRKG1/TUBB2B/CTNNA1/DAB1/NRP1/FN1/B2M/PRRX1/JUN/GAB1/SEMA3E/DNM2/GFRA1/LAMA1/DSCAM/UBB/KANK1/NEO1/PTPRG/SYT1/OPHN1/ACTB/RPS6KA5/S100B/PARD3/ADAM10/ABI1/EPHB1/LHX2/ITGA6/LGI1/NRXN1/ID1/MEF2C/PTPRM/…	87
BP	GO:0001934	positive regulation of protein phosphorylation	92/442	439/5658	3.92699e-20	1.4512e-17	8.65066e-18	APOE/HSP90AA1/MT3/FGFR2/PRKCA/MMD2/CLU/PDGFRB/CCK/MAP4K4/STK3/AGT/GADD45B/AKAP13/HES5/LRP1/BMPR1A/RBPMS/MINK1/CHI3L1/TAOK3/CCL2/MAP3K5/FYN/TNIK/FGF2/CCND3/TNK2/DAB1/NRP1/SOX9/JUN/SLC27A1/PSAP/PTPRJ/FAS/PRNP/FGFR3/TGFB2/UBB/RPS27A/CCNY/STAT3/FGF1/EGR1/RAP1B/ANGPT1/SPAG9/ADCY8/GPR37L1/RPS6KA5/MAP3K14/PLCE1/SOCS3/ABI1/IL6ST/DDR2/SH3RF1/NRG1/KSR1/GPRC5B/SASH1/HIPK2/NEDD9/UBC/ATP2B4/SDC4/ATM/ADORA2B/D…	92
BP	GO:0051338	regulation of transferase activity	87/442	408/5658	1.55524e-19	5.26839e-17	3.1405e-17	APOE/HSPB1/HSP90AA1/MT3/MMD2/CLU/APC/PDGFRB/MAP4K4/STK3/HMBOX1/AGT/GADD45B/AKAP13/ZFP36/HNRNPA2B1/MINK1/CHI3L1/TAOK3/MAP3K5/FYN/TNIK/FGF2/CCND3/DUSP1/VAV3/DAB1/SLC27A1/PTPRJ/PRNP/FGFR3/TGFB2/UBB/RPS27A/CCNY/FGF1/EGR1/ANGPT1/UBASH3B/ACTB/SORL1/TSC2/SPAG9/ADCY8/MAP3K14/RGN/PLCE1/SOCS3/PTPRT/ABI1/DDR2/NRG1/KSR1/GPRC5B/CAMK2N1/SASH1/NEDD9/UBC/WWTR1/ATP2B4/SDC4/ADORA2B/DLG1/VAV2/HNRNPD/C5/TPD52L1/IL6R…	87
BP	GO:0051347	positive regulation of transferase activity	70/442	283/5658	1.87137e-19	5.85164e-17	3.48818e-17	HSP90AA1/MT3/MMD2/CLU/PDGFRB/MAP4K4/STK3/HMBOX1/AGT/GADD45B/AKAP13/HNRNPA2B1/MINK1/CHI3L1/TAOK3/MAP3K5/FYN/TNIK/FGF2/CCND3/VAV3/DAB1/SLC27A1/PRNP/FGFR3/TGFB2/UBB/RPS27A/CCNY/FGF1/EGR1/ANGPT1/SORL1/SPAG9/ADCY8/MAP3K14/PLCE1/ABI1/DDR2/NRG1/GPRC5B/SASH1/NEDD9/UBC/ATP2B4/SDC4/ADORA2B/DLG1/VAV2/HNRNPD/C5/TPD52L1/IL6R/DCUN1D1/RPLP1/TIAM1/RICTOR/STK10/TGFB3/IQGAP1/FGFR1/FRS2/PKD2/NEK7/TAB2/PDGFC/HGF/NRG…	70
BP	GO:0120039	plasma membrane bounded cell projection morphogenesis	67/442	266/5658	4.348e-19	1.26247e-16	7.52563e-17	APOE/HSP90AA1/MT3/FGFR2/GJA1/STMN1/PRKCA/PTPRD/NR4A3/PTPRZ1/NRXN3/CCK/MAP4K4/PREX2/SEMA5A/PTN/CFL1/NR4A2/NLGN1/IL1RAPL1/BMPR1B/LRP1/MINK1/GAB2/CUX1/EPHA6/FYN/TNIK/GLI2/TUBB2B/DAB1/NRP1/FN1/GAB1/SEMA3E/DNM2/GFRA1/LAMA1/DSCAM/UBB/KANK1/NEO1/SYT1/WASF2/OPHN1/ACTB/RPS6KA5/S100B/PARD3/ADAM10/ABI1/EPHB1/LHX2/LGI1/NRXN1/ID1/PTPRM/S100A6/DICER1/NFIB/DOK5/DNM3/TIAM1/IQGAP1/FRS2/TRAK1/PTCH1	67
BP	GO:0048667	cell morphogenesis involved in neuron differentiation	62/442	233/5658	5.40607e-19	1.42454e-16	8.4917e-17	APOE/HSP90AA1/MT3/ID2/FGFR2/STMN1/PRKCA/PTPRD/NR4A3/PTPRZ1/NRXN3/CCK/PREX2/SEMA5A/PTN/CFL1/NR4A2/NLGN1/IL1RAPL1/BMPR1B/LRP1/MINK1/GAB2/CUX1/EPHA6/FYN/TNIK/GLI2/TUBB2B/DAB1/NRP1/FN1/GAB1/SEMA3E/DNM2/GFRA1/LAMA1/DSCAM/NEO1/OPHN1/ACTB/RPS6KA5/S100B/PARD3/ADAM10/ABI1/EPHB1/LHX2/LGI1/NRXN1/ID1/MEF2C/SLC1A3/PTPRM/S100A6/NFIB/DOK5/DNM3/TIAM1/FRS2/TRAK1/PTCH1	62
BP	GO:0000904	cell morphogenesis involved in differentiation	74/442	317/5658	5.60703e-19	1.42454e-16	8.4917e-17	APOE/HSP90AA1/MT3/ID2/FGFR2/STMN1/PRKCA/PTPRD/NR4A3/PTPRZ1/NRXN3/CCK/PREX2/SEMA5A/PTN/CFL1/NR4A2/NLGN1/IL1RAPL1/DOCK1/LIMS1/BMPR1B/LRP1/ANTXR1/MINK1/GAB2/CUX1/EPHA6/FYN/TNIK/GLI2/PREX1/TUBB2B/DAB1/NRP1/FN1/GAB1/SEMA3E/DNM2/GFRA1/LAMA1/DSCAM/KANK1/NEO1/OPHN1/ACTB/RPS6KA5/S100B/PARD3/ADAM10/ABI1/EPHB1/LHX2/LGI1/NRXN1/ID1/MEF2C/ITGAV/SLC1A3/NEDD9/MERTK/PTPRM/S100A6/NFIB/SIPA1L3/DOK5/DNM3/TIAM1/FRS2/…	74
BP	GO:0043549	regulation of kinase activity	81/442	370/5658	6.47793e-19	1.54899e-16	9.23356e-17	APOE/HSPB1/HSP90AA1/MT3/MMD2/CLU/APC/PDGFRB/MAP4K4/STK3/AGT/GADD45B/AKAP13/MINK1/CHI3L1/TAOK3/MAP3K5/FYN/TNIK/FGF2/CCND3/DUSP1/VAV3/DAB1/SLC27A1/PTPRJ/PRNP/FGFR3/TGFB2/UBB/RPS27A/CCNY/FGF1/EGR1/ANGPT1/UBASH3B/ACTB/SORL1/TSC2/SPAG9/ADCY8/MAP3K14/RGN/PLCE1/SOCS3/PTPRT/ABI1/DDR2/NRG1/KSR1/GPRC5B/CAMK2N1/SASH1/NEDD9/UBC/WWTR1/ATP2B4/SDC4/ADORA2B/DLG1/VAV2/C5/TPD52L1/IL6R/RPLP1/TIAM1/RICTOR/PPP2R5A/KA…	81
BP	GO:0048812	neuron projection morphogenesis	65/442	255/5658	8.03104e-19	1.78388e-16	1.06338e-16	APOE/HSP90AA1/MT3/FGFR2/GJA1/STMN1/PRKCA/PTPRD/NR4A3/PTPRZ1/NRXN3/CCK/MAP4K4/PREX2/SEMA5A/PTN/CFL1/NR4A2/NLGN1/IL1RAPL1/BMPR1B/LRP1/MINK1/GAB2/CUX1/EPHA6/FYN/TNIK/GLI2/TUBB2B/DAB1/NRP1/FN1/GAB1/SEMA3E/DNM2/GFRA1/LAMA1/DSCAM/UBB/NEO1/SYT1/OPHN1/ACTB/RPS6KA5/S100B/PARD3/ADAM10/ABI1/EPHB1/LHX2/LGI1/NRXN1/ID1/PTPRM/S100A6/DICER1/NFIB/DOK5/DNM3/TIAM1/IQGAP1/FRS2/TRAK1/PTCH1	65
BP	GO:0048858	cell projection morphogenesis	67/442	269/5658	8.33793e-19	1.78388e-16	1.06338e-16	APOE/HSP90AA1/MT3/FGFR2/GJA1/STMN1/PRKCA/PTPRD/NR4A3/PTPRZ1/NRXN3/CCK/MAP4K4/PREX2/SEMA5A/PTN/CFL1/NR4A2/NLGN1/IL1RAPL1/BMPR1B/LRP1/MINK1/GAB2/CUX1/EPHA6/FYN/TNIK/GLI2/TUBB2B/DAB1/NRP1/FN1/GAB1/SEMA3E/DNM2/GFRA1/LAMA1/DSCAM/UBB/KANK1/NEO1/SYT1/WASF2/OPHN1/ACTB/RPS6KA5/S100B/PARD3/ADAM10/ABI1/EPHB1/LHX2/LGI1/NRXN1/ID1/PTPRM/S100A6/DICER1/NFIB/DOK5/DNM3/TIAM1/IQGAP1/FRS2/TRAK1/PTCH1	67
BP	GO:0030334	regulation of cell migration	90/442	444/5658	1.16422e-18	2.28512e-16	1.36216e-16	APOE/HSPB1/TMSB4X/PRKCA/APOD/GLUL/NR4A3/APC/PDGFRB/LDLRAD4/MAP4K4/DOCK4/SEMA5A/DLC1/PTN/AGT/DOCK1/LRP1/SMURF2/BMPR1A/MINK1/CCL2/CXCL14/F3/FGF2/PREX1/DUSP1/SULF1/PRKG1/CDH13/NRP1/SERPINE2/FN1/SOX9/PIK3C2A/JUN/GAB1/CD9/MCC/PTPRJ/SRGAP1/SEMA3E/MSN/LAMA1/BST2/LGALS3/TGFB2/IL33/KANK1/STAT3/FGF1/SST/PTPRG/ANGPT1/SORL1/SPAG9/ADAM10/PTPRT/PPARGC1A/DDR2/ITGA6/NRG1/MEF2C/HIF1A/ITGAV/SASH1/NEDD9/PTPRM/SDC4/…	90
BP	GO:0040012	regulation of locomotion	96/442	493/5658	1.18454e-18	2.28512e-16	1.36216e-16	APOE/HSPB1/TMSB4X/PRKCA/APOD/GLUL/NR4A3/APC/PDGFRB/LDLRAD4/MAP4K4/DOCK4/SEMA5A/DLC1/PTN/AGT/DOCK1/LRP1/SMURF2/BMPR1A/MINK1/CCL2/CXCL14/F3/FGF2/PREX1/DUSP1/SULF1/PRKG1/TUBB2B/CTNNA1/CDH13/NRP1/SERPINE2/FN1/SOX9/PIK3C2A/PML/JUN/GAB1/CD9/MCC/PTPRJ/SRGAP1/SEMA3E/MSN/LAMA1/DSCAM/BST2/LGALS3/TGFB2/IL33/KANK1/STAT3/FGF1/SST/PTPRG/ANGPT1/SORL1/SPAG9/RGN/ADAM10/PTPRT/PPARGC1A/DDR2/ITGA6/NRG1/MEF2C/HIF1A/I…	96
BP	GO:0032990	cell part morphogenesis	67/442	271/5658	1.27901e-18	2.28512e-16	1.36216e-16	APOE/HSP90AA1/MT3/FGFR2/GJA1/STMN1/PRKCA/PTPRD/NR4A3/PTPRZ1/NRXN3/CCK/MAP4K4/PREX2/SEMA5A/PTN/CFL1/NR4A2/NLGN1/IL1RAPL1/BMPR1B/LRP1/MINK1/GAB2/CUX1/EPHA6/FYN/TNIK/GLI2/TUBB2B/DAB1/NRP1/FN1/GAB1/SEMA3E/DNM2/GFRA1/LAMA1/DSCAM/UBB/KANK1/NEO1/SYT1/WASF2/OPHN1/ACTB/RPS6KA5/S100B/PARD3/ADAM10/ABI1/EPHB1/LHX2/LGI1/NRXN1/ID1/PTPRM/S100A6/DICER1/NFIB/DOK5/DNM3/TIAM1/IQGAP1/FRS2/TRAK1/PTCH1	67
BP	GO:2000145	regulation of cell motility	93/442	469/5658	1.30081e-18	2.28512e-16	1.36216e-16	APOE/HSPB1/TMSB4X/PRKCA/APOD/GLUL/NR4A3/APC/PDGFRB/LDLRAD4/MAP4K4/DOCK4/SEMA5A/DLC1/PTN/AGT/DOCK1/LRP1/SMURF2/BMPR1A/MINK1/CCL2/CXCL14/F3/FGF2/PREX1/DUSP1/SULF1/PRKG1/CTNNA1/CDH13/NRP1/SERPINE2/FN1/SOX9/PIK3C2A/JUN/GAB1/CD9/MCC/PTPRJ/SRGAP1/SEMA3E/MSN/LAMA1/BST2/LGALS3/TGFB2/IL33/KANK1/STAT3/FGF1/SST/PTPRG/ANGPT1/SORL1/SPAG9/RGN/ADAM10/PTPRT/PPARGC1A/DDR2/ITGA6/NRG1/MEF2C/HIF1A/ITGAV/SASH1/NEDD9/…	93
BP	GO:0048666	neuron development	91/442	453/5658	1.34915e-18	2.28512e-16	1.36216e-16	APOE/HSP90AA1/MT3/ID2/FGFR2/GJA1/STMN1/PRKCA/APOD/PTPRD/NR4A3/PTPRZ1/NRXN3/CCK/GABRB1/MAP4K4/PREX2/SEMA5A/PTN/CFL1/CD38/NR4A2/NLGN1/AGT/TNC/IL1RAPL1/BMPR1B/HES5/LRP1/PMP22/MINK1/GAB2/CUX1/EPHA6/FYN/TNIK/GLI2/PREX1/PRKG1/TUBB2B/CTNNA1/DAB1/NRP1/FN1/B2M/PRRX1/JUN/GAB1/SEMA3E/DNM2/GFRA1/LAMA1/DSCAM/TGFB2/UBB/KANK1/NEO1/PTPRG/SYT1/OPHN1/ACTB/RPS6KA5/S100B/PARD3/ADAM10/ABI1/EPHB1/LHX2/ITGA6/LGI1/NRXN1…	91
BP	GO:0045859	regulation of protein kinase activity	77/442	348/5658	2.87638e-18	4.46352e-16	2.66072e-16	APOE/HSPB1/HSP90AA1/MT3/MMD2/CLU/APC/PDGFRB/MAP4K4/STK3/AGT/GADD45B/AKAP13/MINK1/CHI3L1/TAOK3/MAP3K5/FYN/TNIK/FGF2/CCND3/DUSP1/DAB1/SLC27A1/PTPRJ/PRNP/TGFB2/UBB/RPS27A/CCNY/FGF1/EGR1/ANGPT1/UBASH3B/ACTB/SORL1/TSC2/SPAG9/ADCY8/MAP3K14/RGN/PLCE1/SOCS3/PTPRT/ABI1/DDR2/NRG1/KSR1/GPRC5B/CAMK2N1/SASH1/NEDD9/UBC/WWTR1/ATP2B4/SDC4/ADORA2B/DLG1/C5/TPD52L1/IL6R/RPLP1/TIAM1/RICTOR/KAT2B/STK10/TGFB3/IQGAP1/F…	77
BP	GO:0033674	positive regulation of kinase activity	64/442	254/5658	2.941e-18	4.46352e-16	2.66072e-16	HSP90AA1/MT3/MMD2/CLU/PDGFRB/MAP4K4/STK3/AGT/GADD45B/AKAP13/MINK1/CHI3L1/TAOK3/MAP3K5/FYN/TNIK/FGF2/CCND3/VAV3/DAB1/SLC27A1/PRNP/FGFR3/TGFB2/UBB/RPS27A/CCNY/FGF1/EGR1/ANGPT1/SPAG9/ADCY8/MAP3K14/PLCE1/ABI1/DDR2/NRG1/GPRC5B/SASH1/NEDD9/UBC/ATP2B4/SDC4/ADORA2B/DLG1/VAV2/C5/TPD52L1/IL6R/RPLP1/TIAM1/RICTOR/STK10/TGFB3/IQGAP1/FGFR1/FRS2/PKD2/TAB2/PDGFC/HGF/NRG3/ADORA1/GHR	64
BP	GO:0035239	tube morphogenesis	90/442	450/5658	2.9647e-18	4.46352e-16	2.66072e-16	APOE/HSPB1/ID2/FGFR2/GJA1/PRKCA/APOD/GLUL/NR4A3/PDGFRB/SEMA5A/DLC1/PTN/CFL1/MYO1E/STK3/AGT/TNC/ZFP36L1/HES5/LRP1/BMPR1A/NR4A1/CHI3L1/CCL2/SAT1/F3/FGF2/GLI2/SULF1/PHACTR4/ZMIZ1/CDH13/VAV3/NRP1/FN1/SOX9/ARHGAP24/PIK3C2A/PRRX1/S100A1/PML/JUN/GAB1/ZEB1/SEMA3E/LAMA1/TGFB2/STAT3/FGF1/RAMP1/RNF213/WASF2/ANGPT1/TSC2/AQP1/RBPJ/EPHB1/LHX2/ITGB8/ID1/YAP1/MEF2C/HIF1A/ITGAV/SASH1/HIPK2/PTPRM/SDC4/MFGE8/STAT1/…	90
BP	GO:0001568	blood vessel development	79/442	372/5658	1.30592e-17	1.89591e-15	1.13016e-15	APOE/HSPB1/FGFR2/GJA1/PRKCA/APOD/GLUL/PDGFRB/SEMA5A/PTN/TCF7L2/MYO1E/AGT/ZFP36L1/LRP1/BMPR1A/ANTXR1/NR4A1/CHI3L1/CCL2/SAT1/F3/FGF2/SULF1/LTBP1/ZMIZ1/CDH13/VAV3/NRP1/FN1/ARHGAP24/PIK3C2A/PRRX1/S100A1/PML/JUN/GAB1/SEMA3E/DNM2/LAMA1/TGFB2/STAT3/FGF1/RAMP1/EGR1/RNF213/WASF2/ANGPT1/SOCS3/AQP1/FOXO1/RBPJ/EPHB1/ITGB8/ID1/YAP1/MEF2C/HIF1A/ITGAV/SASH1/HIPK2/PTPRM/MFGE8/STAT1/VAV2/ADAMTS9/IL6R/JAK1/S1PR1/F…	79
BP	GO:0070848	response to growth factor	76/442	352/5658	2.22433e-17	3.07684e-15	1.83411e-15	HSPA1A/HSPB1/MT3/FGFR2/FOS/PDGFRB/LDLRAD4/PTN/AGT/TNC/LIMS1/ZFP36L1/BMPR1B/MEIS2/HES5/SMURF2/BMPR1A/ZFP36/PRDM16/NR4A1/CCL2/FYN/ZFYVE16/FGF2/SULF1/LTBP1/TOB1/NRP1/SOX9/ZNF423/PML/JUN/CD63/GAB1/CASK/TPR/DDX5/ZEB1/DNM2/HNRNPM/FGFR3/TGFB2/UBB/RPS27A/FGF1/EGR1/NEO1/SORL1/FGF12/PARD3/FUT8/RBPJ/PPARGC1A/ID1/MEF2C/HIF1A/HIPK2/UBC/DDIT4/HSPA5/CHST11/APPL2/POLR2L/DOK5/HTRA1/POLR2J/TGFB3/IQGAP1/FGFR1/FRS2/…	76
BP	GO:0008284	positive regulation of cell proliferation	87/442	439/5658	2.27073e-17	3.07684e-15	1.83411e-15	ID2/FGFR2/PRKCA/GLUL/TFRC/NR4A3/PDGFRB/CCK/SEMA5A/PTN/TCF7L2/CD38/AGT/TNC/MEIS2/HES5/BMPR1A/NR4A1/GAB2/NEAT1/CNTFR/MAP3K5/F3/FGF2/GLI2/PHIP/ZMIZ1/CDH13/VAV3/NRP1/FN1/SOX9/PRRX1/PML/JUN/BST2/FGFR3/TGFB2/TET1/STAT3/HPSE2/FGF1/EGR1/SRSF6/GPR37L1/S100B/AQP1/ADAM10/RBPJ/IL6ST/PPARGC1A/LHX2/DDR2/ID1/NRG1/YAP1/ABCC4/MEF2C/HIF1A/ITGAV/HIPK2/S100A6/ID4/WWTR1/STAT1/DLG1/STAMBP/NAMPT/IL6R/S1PR1/BCL6/HTRA1/T…	87
BP	GO:0045860	positive regulation of protein kinase activity	61/442	243/5658	2.44314e-17	3.20366e-15	1.90971e-15	HSP90AA1/MT3/MMD2/CLU/PDGFRB/MAP4K4/STK3/AGT/GADD45B/AKAP13/MINK1/CHI3L1/TAOK3/MAP3K5/FYN/TNIK/FGF2/CCND3/DAB1/SLC27A1/PRNP/TGFB2/UBB/RPS27A/CCNY/FGF1/EGR1/ANGPT1/SPAG9/ADCY8/MAP3K14/PLCE1/ABI1/DDR2/NRG1/GPRC5B/SASH1/NEDD9/UBC/ATP2B4/SDC4/ADORA2B/DLG1/C5/TPD52L1/IL6R/RPLP1/TIAM1/RICTOR/STK10/TGFB3/IQGAP1/FGFR1/FRS2/PKD2/TAB2/PDGFC/HGF/NRG3/ADORA1/GHR	61
BP	GO:0023014	signal transduction by protein phosphorylation	82/442	401/5658	3.18341e-17	3.95134e-15	2.3554e-15	APOE/MT3/FGFR2/PRKCA/PDGFRB/PEBP1/MAP4K4/STK3/AGT/ZFP36L1/GADD45B/AKAP13/LRP1/ZFP36/MINK1/CHI3L1/TAOK3/CCL2/MAP3K5/FYN/TNIK/FGF2/DUSP1/NRP1/FN1/SOX9/JUN/PSAP/ITCH/PTPRJ/FAS/GFRA1/FGFR3/TGFB2/UBB/RPS27A/FGF1/RAP1B/ANGPT1/MBP/SORL1/SPAG9/NDRG2/GPR37L1/MAP3K14/PLCE1/FOXO1/EPHB1/SH3RF1/ID1/NRG1/KSR1/MEF2C/CAMK2N1/ITGAV/SASH1/HIPK2/UBC/ADORA2B/DLG1/C5/TPD52L1/JAK1/DOK5/YWHAE/TIAM1/STK10/TGFB3/IQGAP1/F…	82
BP	GO:0050678	regulation of epithelial cell proliferation	51/442	178/5658	3.20773e-17	3.95134e-15	2.3554e-15	APOE/FGFR2/GJA1/PRKCA/GLUL/NR4A3/SEMA5A/PTN/TCF7L2/ZFP36L1/HES5/BMPR1A/ZFP36/NR4A1/CCL2/F3/FGF2/SULF1/CDH13/NRP1/SOX9/B2M/JUN/MCC/CASK/TGFB2/STAT3/FGF1/SRSF6/INTU/WFDC1/RGN/CDC73/ID1/YAP1/MEF2C/HIF1A/PTPRM/STAT1/DLG1/NR1D1/NFIB/EAF2/HTRA1/RICTOR/FGFR1/FRS2/AR/TGFBR3/PTCH1/CFLAR	51
BP	GO:0001944	vasculature development	80/442	390/5658	6.90622e-17	8.257e-15	4.92202e-15	APOE/HSPB1/FGFR2/GJA1/PRKCA/APOD/GLUL/PDGFRB/SEMA5A/PTN/TCF7L2/MYO1E/AGT/ZFP36L1/LRP1/BMPR1A/ANTXR1/NR4A1/CHI3L1/CCL2/SAT1/F3/FGF2/SULF1/LTBP1/ZMIZ1/CDH13/VAV3/NRP1/FN1/ARHGAP24/PIK3C2A/PRRX1/S100A1/PML/JUN/GAB1/SEMA3E/DNM2/LAMA1/TGFB2/STAT3/FGF1/RAMP1/EGR1/RNF213/WASF2/ANGPT1/SOCS3/AQP1/FOXO1/ADAM10/RBPJ/EPHB1/ITGB8/ID1/YAP1/MEF2C/HIF1A/ITGAV/SASH1/HIPK2/PTPRM/MFGE8/STAT1/VAV2/ADAMTS9/IL6R/JAK1/…	80
BP	GO:0071363	cellular response to growth factor stimulus	73/442	336/5658	7.37917e-17	8.57037e-15	5.10882e-15	HSPA1A/HSPB1/MT3/FGFR2/FOS/PDGFRB/LDLRAD4/PTN/AGT/LIMS1/ZFP36L1/BMPR1B/HES5/SMURF2/BMPR1A/ZFP36/PRDM16/NR4A1/CCL2/FYN/ZFYVE16/FGF2/SULF1/LTBP1/TOB1/NRP1/SOX9/ZNF423/PML/JUN/CD63/GAB1/CASK/DDX5/ZEB1/DNM2/HNRNPM/FGFR3/TGFB2/UBB/RPS27A/FGF1/EGR1/NEO1/SORL1/FGF12/PARD3/FUT8/RBPJ/PPARGC1A/ID1/MEF2C/HIF1A/HIPK2/UBC/DDIT4/HSPA5/CHST11/APPL2/POLR2L/DOK5/HTRA1/POLR2J/TGFB3/IQGAP1/FGFR1/FRS2/CHRDL1/FBN2/HG…	73
BP	GO:0000165	MAPK cascade	81/442	399/5658	8.15519e-17	9.20857e-15	5.48925e-15	APOE/MT3/FGFR2/PRKCA/PDGFRB/PEBP1/MAP4K4/STK3/AGT/ZFP36L1/GADD45B/AKAP13/LRP1/ZFP36/MINK1/CHI3L1/TAOK3/CCL2/MAP3K5/FYN/TNIK/FGF2/DUSP1/NRP1/FN1/SOX9/JUN/PSAP/ITCH/PTPRJ/FAS/GFRA1/FGFR3/TGFB2/UBB/RPS27A/FGF1/RAP1B/ANGPT1/MBP/SORL1/SPAG9/NDRG2/GPR37L1/MAP3K14/PLCE1/FOXO1/EPHB1/SH3RF1/ID1/NRG1/KSR1/MEF2C/CAMK2N1/ITGAV/SASH1/HIPK2/UBC/ADORA2B/DLG1/C5/TPD52L1/JAK1/DOK5/YWHAE/TIAM1/TGFB3/IQGAP1/FGFR1/F…	81
BP	GO:0072358	cardiovascular system development	80/442	394/5658	1.29958e-16	1.42778e-14	8.51105e-15	APOE/HSPB1/FGFR2/GJA1/PRKCA/APOD/GLUL/PDGFRB/SEMA5A/PTN/TCF7L2/MYO1E/AGT/ZFP36L1/LRP1/BMPR1A/ANTXR1/NR4A1/CHI3L1/CCL2/SAT1/F3/FGF2/SULF1/LTBP1/ZMIZ1/CDH13/VAV3/NRP1/FN1/ARHGAP24/PIK3C2A/PRRX1/S100A1/PML/JUN/GAB1/SEMA3E/DNM2/LAMA1/TGFB2/STAT3/FGF1/RAMP1/EGR1/RNF213/WASF2/ANGPT1/SOCS3/AQP1/FOXO1/ADAM10/RBPJ/EPHB1/ITGB8/ID1/YAP1/MEF2C/HIF1A/ITGAV/SASH1/HIPK2/PTPRM/MFGE8/STAT1/VAV2/ADAMTS9/IL6R/JAK1/…	80
BP	GO:0050673	epithelial cell proliferation	53/442	203/5658	6.14133e-16	6.41022e-14	3.82115e-14	APOE/ID2/FGFR2/GJA1/PRKCA/GLUL/NR4A3/SEMA5A/PTN/TCF7L2/ZFP36L1/HES5/BMPR1A/ZFP36/NR4A1/CCL2/F3/FGF2/SULF1/CDH13/NRP1/SOX9/B2M/JUN/MCC/CASK/TGFB2/STAT3/FGF1/SRSF6/INTU/WFDC1/RGN/CDC73/ID1/YAP1/MEF2C/HIF1A/PTPRM/STAT1/DLG1/NR1D1/NFIB/EAF2/HTRA1/RICTOR/FGFR1/FRS2/HGF/AR/TGFBR3/PTCH1/CFLAR	53
BP	GO:0022603	regulation of anatomical structure morphogenesis	90/442	487/5658	6.15003e-16	6.41022e-14	3.82115e-14	APOE/HSPB1/GPC6/MT3/FGFR2/PRKCA/PTPRD/GLUL/SEMA5A/DLC1/PTN/CFL1/NLGN1/AGT/IL1RAPL1/DOCK1/LIMS1/AKAP13/HES5/LRP1/SMURF2/BMPR1A/CHI3L1/TMBIM1/CUX1/CCL2/FYN/F3/TNIK/FGF2/PREX1/SULF1/PHIP/TUBB2B/DAB1/NRP1/FN1/SOX9/PIK3C2A/S100A1/PML/GAB1/SEMA3E/DNM2/MSN/DSCAM/TGFB2/MYO10/KANK1/STAT3/FGF1/SYT1/SRSF6/MBP/S100B/AQP1/ADAM10/RBPJ/PPARGC1A/ITGB8/ID1/MEF2C/HIF1A/SASH1/HIPK2/NEDD9/PTPRM/ZNRF3/STAT1/DLG1/NFIB…	90
BP	GO:0051130	positive regulation of cellular component organization	89/442	481/5658	8.58354e-16	8.72302e-14	5.19982e-14	HSPA1A/APOE/HSP90AA1/HSPA1B/CLU/PTPRD/APC/PDGFRB/CCK/MAP4K4/SEMA5A/PTN/CFL1/ARHGEF10/HMBOX1/NLGN1/AGT/IL1RAPL1/DOCK1/LIMS1/LRP1/HNRNPA2B1/TF/CUX1/CCL2/FYN/PREX1/PHIP/TUBB2B/NRP1/FN1/WBP2/SOX9/B2M/PML/JUN/CD63/TPR/PTPRJ/DNM2/GSN/MSN/DSCAM/TGFB2/TET1/SYT1/WASF2/ANGPT1/MYO18A/RPS6KA5/JARID2/HIP1R/PPARGC1A/EPHB1/DDR2/ITGA6/NRXN1/ABCA1/ID1/HIF1A/ITGAV/NEDD9/MERTK/SDC4/ATM/MFGE8/DLG1/HSPA5/HIP1/HNRNPD/…	89
BP	GO:0040007	growth	78/442	394/5658	1.52294e-15	1.50994e-13	9.00078e-14	HSPA1A/APOE/HSP90AA1/MT3/HSPA1B/FGFR2/GJA1/APOD/PDGFRB/SEMA5A/PTN/CD38/STK3/ENO1/AGT/TNC/ZFP36L1/AKAP13/BMPR1B/LRP1/BMPR1A/FGF2/GLI2/ZMIZ1/NLGN4X/NRP1/SERPINE2/FN1/SOX9/PML/PSAP/CD9/ITCH/PTPRJ/SEMA3E/DNM2/GSN/DSCAM/BST2/FGFR3/TGFB2/STAT3/FGF1/SYT1/WFDC1/PLCE1/JARID2/SOCS3/OSGIN2/ADAM10/RBPJ/LHX2/DDR2/LGI1/CDC73/YAP1/MEF2C/HIF1A/NEDD9/WWTR1/ATM/CHST11/IGSF11/SH3PXD2B/RERG/EAF2/S1PR1/BCL6/TIAM1/IQG…	78
BP	GO:0033002	muscle cell proliferation	38/442	115/5658	2.59278e-15	2.50944e-13	1.49589e-13	ID2/FGFR2/GJA1/APOD/NR4A3/PDGFRB/TCF7L2/AGT/HES5/BMPR1A/MAP3K5/FGF2/PRKG1/CDH13/JUN/PDE1A/TGFB2/STAT3/ANGPT1/NDRG2/JARID2/SF1/RBPJ/PPARGC1A/EPHB1/YAP1/ABCC4/ELN/MEF2C/STAT1/NAMPT/IL6R/S1PR1/MEGF10/TGFB3/FGFR1/TGFBR3/CFLAR	38
MF	GO:0008047	enzyme activator activity	54/438	212/5628	8.5196e-16	4.64318e-13	3.29126e-13	APOE/MT3/DOCK4/DNAJB1/PREX2/DLC1/ALDH1A1/STK3/DOCK1/RALGAPA2/AGAP1/RGS20/RIN2/TBC1D22A/PREX1/PHACTR4/VAV3/RGS6/NRP1/FN1/ARHGAP24/JUN/PSAP/SRGAP1/OPHN1/GDI2/TSC2/RGS16/ARHGAP31/ABI1/ARHGAP29/ASAP2/NRG1/GPRC5B/SIPA1L2/DCP1B/ARHGAP21/CHN2/SH3PXD2B/SIPA1L3/ARHGAP17/RPLP1/RICTOR/PPP2R5A/IQGAP1/ARHGEF10L/MYO9B/FRS2/CTSH/DOCK5/NRG3/ARFGAP3/FBLN1/CFLAR	54
MF	GO:0030234	enzyme regulator activity	80/438	416/5628	2.75177e-15	7.49859e-13	5.31527e-13	APOE/HSPB1/HSP90AA1/MT3/APC/PEBP1/DOCK4/DNAJB1/PREX2/DLC1/ALDH1A1/PTN/STK3/AGT/DOCK1/RALGAPA2/AGAP1/TAOK3/RGS20/RIN2/TBC1D22A/PREX1/CCND3/PHACTR4/VAV3/TNK2/RGS6/NRP1/SERPINE2/FN1/ARHGAP24/JUN/PSAP/SRGAP1/BST2/LGALS3/CCNY/OPHN1/GDI2/TSC2/WFDC1/RGS16/PPP2R1B/MAP3K14/RGN/SOCS3/ARHGAP31/ABI1/ARHGAP29/ASAP2/NRG1/GPRC5B/CAMK2N1/ATP2B4/SIPA1L2/DCP1B/ARHGAP21/CHN2/SH3PXD2B/C5/TXNIP/SIPA1L3/ARHGAP17/RPLP1…	80
CC	GO:0044463	cell projection part	85/441	482/5894	6.92811e-15	7.66898e-13	4.94773e-13	APOE/HSPB1/HSP90AA1/MT3/APOD/CLU/GLUL/APC/CCK/GABRB1/DNAJB1/DLC1/CFL1/NLGN1/IL1RAPL1/SLC7A11/BMPR1B/LRP1/BMPR1A/ANTXR1/ACTG1/MINK1/FYN/GLI2/PREX1/GABRG1/NLGN4X/NRP1/CASK/PTPRJ/DNM2/FUS/MSN/PRNP/DSCAM/MYO10/KANK1/RPL28/SYT1/PTBP2/INTU/OPHN1/CSNK1A1/MBP/ACTB/ADCY8/NDRG2/GPR37L1/PARD3/AQP1/ADAM10/ABI1/HIP1R/IL6ST/PPARGC1A/EPHB1/WLS/KSR1/HIF1A/CAMK2N1/ITGAV/MERTK/ATP2B4/RPS6/STAT1/DLG1/DICER1/NR1D1/A…	85
CC	GO:0120038	plasma membrane bounded cell projection part	85/441	482/5894	6.92811e-15	7.66898e-13	4.94773e-13	APOE/HSPB1/HSP90AA1/MT3/APOD/CLU/GLUL/APC/CCK/GABRB1/DNAJB1/DLC1/CFL1/NLGN1/IL1RAPL1/SLC7A11/BMPR1B/LRP1/BMPR1A/ANTXR1/ACTG1/MINK1/FYN/GLI2/PREX1/GABRG1/NLGN4X/NRP1/CASK/PTPRJ/DNM2/FUS/MSN/PRNP/DSCAM/MYO10/KANK1/RPL28/SYT1/PTBP2/INTU/OPHN1/CSNK1A1/MBP/ACTB/ADCY8/NDRG2/GPR37L1/PARD3/AQP1/ADAM10/ABI1/HIP1R/IL6ST/PPARGC1A/EPHB1/WLS/KSR1/HIF1A/CAMK2N1/ITGAV/MERTK/ATP2B4/RPS6/STAT1/DLG1/DICER1/NR1D1/A…	85
CC	GO:0005924	cell-substrate adherens junction	54/441	231/5894	8.71572e-15	7.66898e-13	4.94773e-13	HSPA1A/HSPB1/HSPA1B/GJA1/RPS15/PDGFRB/MAP4K4/DLC1/CFL1/TNC/LIMS1/LRP1/MPZL1/ACTG1/RPL18/PPIA/RPL8/CTNNA1/CDH13/NRP1/ARHGAP24/B2M/CD9/CASK/DNM2/GSN/MSN/FGFR3/GDI2/ACTB/ARHGAP31/ADAM10/RPLP2/SORBS1/DDR2/ITGA6/ITGB8/ITGAV/NEDD9/SDC4/HSPA5/RPL19/GNA12/JAK1/RPLP1/YWHAE/RPL12/IQGAP1/TNS3/RPL37A/RPS9/CAPN2/HSPA8/RPL31	54
CC	GO:0005925	focal adhesion	54/441	231/5894	8.71572e-15	7.66898e-13	4.94773e-13	HSPA1A/HSPB1/HSPA1B/GJA1/RPS15/PDGFRB/MAP4K4/DLC1/CFL1/TNC/LIMS1/LRP1/MPZL1/ACTG1/RPL18/PPIA/RPL8/CTNNA1/CDH13/NRP1/ARHGAP24/B2M/CD9/CASK/DNM2/GSN/MSN/FGFR3/GDI2/ACTB/ARHGAP31/ADAM10/RPLP2/SORBS1/DDR2/ITGA6/ITGB8/ITGAV/NEDD9/SDC4/HSPA5/RPL19/GNA12/JAK1/RPLP1/YWHAE/RPL12/IQGAP1/TNS3/RPL37A/RPS9/CAPN2/HSPA8/RPL31	54
CC	GO:0005912	adherens junction	63/441	300/5894	9.74438e-15	7.66898e-13	4.94773e-13	HSPA1A/HSPB1/HSPA1B/GJA1/RPS15/APC/PDGFRB/MAP4K4/DLC1/CFL1/MYO1E/TNC/LIMS1/LRP1/MPZL1/ACTG1/RPL18/PPIA/RPL8/CTNNA1/CDH13/TNK2/NRP1/ARHGAP24/B2M/CD9/CASK/DNM2/GSN/MSN/FGFR3/NDRG1/GDI2/ACTB/PARD3/ARHGAP31/ADAM10/RPLP2/SORBS1/DDR2/ITGA6/ITGB8/ITGAV/NEDD9/PTPRM/SDC4/DLG1/HSPA5/RPL19/FRMD5/GNA12/JAK1/RPLP1/YWHAE/RPL12/IQGAP1/FRS2/TNS3/RPL37A/RPS9/CAPN2/HSPA8/RPL31	63
CC	GO:0030055	cell-substrate junction	54/441	232/5894	1.06023e-14	7.66898e-13	4.94773e-13	HSPA1A/HSPB1/HSPA1B/GJA1/RPS15/PDGFRB/MAP4K4/DLC1/CFL1/TNC/LIMS1/LRP1/MPZL1/ACTG1/RPL18/PPIA/RPL8/CTNNA1/CDH13/NRP1/ARHGAP24/B2M/CD9/CASK/DNM2/GSN/MSN/FGFR3/GDI2/ACTB/ARHGAP31/ADAM10/RPLP2/SORBS1/DDR2/ITGA6/ITGB8/ITGAV/NEDD9/SDC4/HSPA5/RPL19/GNA12/JAK1/RPLP1/YWHAE/RPL12/IQGAP1/TNS3/RPL37A/RPS9/CAPN2/HSPA8/RPL31	54
BP	GO:0043066	negative regulation of apoptotic process	75/442	383/5658	1.09586e-14	1.03597e-12	6.17546e-13	HSPA1A/APOE/HSPB1/MT3/HSPA1B/FGFR2/PRKCA/CLU/NR4A3/PTPRZ1/PDGFRB/MAP4K4/SEMA5A/CFL1/TCF7L2/CD38/NR4A2/ENO1/LRP1/TMBIM1/CCL2/CNTFR/FYN/GLI2/DUSP1/PHIP/CTNNA1/NRP1/SOX9/JUN/ITCH/FAS/PRNP/LGALS3/UBB/RPS27A/STAT3/RPL10/SRSF6/ANGPT1/MYO18A/RGN/SOCS3/AQP1/FOXO1/HIP1R/IL6ST/PPARGC1A/ITGA6/CDC73/SH3RF1/ID1/YAP1/MEF2C/HIF1A/ITGAV/HIPK2/MERTK/UBC/RPS6/IFIT3/HSPA5/CHST11/STAMBP/BCL6/YWHAE/TGFB3/IFI6/CTSH/BI…	75
CC	GO:0036477	somatodendritic compartment	61/441	289/5894	2.13786e-14	1.32547e-12	8.55144e-13	APOE/HSP90AA1/MT3/APOD/CLU/GLUL/CCK/GABRB1/DNAJB1/NLGN1/IL1RAPL1/BMPR1B/LRP1/BMPR1A/MINK1/CPE/FYN/PREX1/GABRG1/NLGN4X/DAB1/NRP1/DNM2/PDE1A/FUS/PRNP/DSCAM/TGFB2/MYO10/UBB/RPL28/SST/PTBP2/OPHN1/MBP/ADCY8/S100B/PARD3/ADAM10/HIP1R/IL6ST/PPARGC1A/EPHB1/NRXN1/WLS/CAMK2N1/SLC1A3/RPS6/STAT1/DICER1/NR1D1/GNAO1/DNM3/TIAM1/TGFB3/SRI/TRAK1/CAPN2/ADORA1/PTCH1/HSPA8	61
BP	GO:0043408	regulation of MAPK cascade	69/442	337/5658	1.47847e-14	1.3659e-12	8.14218e-13	APOE/MT3/FGFR2/PRKCA/PDGFRB/PEBP1/MAP4K4/STK3/GADD45B/AKAP13/LRP1/MINK1/CHI3L1/TAOK3/CCL2/MAP3K5/TNIK/FGF2/DUSP1/NRP1/FN1/JUN/PSAP/ITCH/PTPRJ/FAS/FGFR3/TGFB2/UBB/RPS27A/FGF1/RAP1B/ANGPT1/SORL1/SPAG9/NDRG2/GPR37L1/MAP3K14/PLCE1/FOXO1/EPHB1/SH3RF1/ID1/NRG1/KSR1/CAMK2N1/SASH1/HIPK2/UBC/ADORA2B/DLG1/C5/TPD52L1/DOK5/TIAM1/TGFB3/IQGAP1/FGFR1/FRS2/TAB2/PDGFC/HGF/AR/ADORA1/FBLN1/DDT/GHR/CFLAR/PRDX1	69
CC	GO:0070161	anchoring junction	63/441	306/5894	2.61097e-14	1.41645e-12	9.13838e-13	HSPA1A/HSPB1/HSPA1B/GJA1/RPS15/APC/PDGFRB/MAP4K4/DLC1/CFL1/MYO1E/TNC/LIMS1/LRP1/MPZL1/ACTG1/RPL18/PPIA/RPL8/CTNNA1/CDH13/TNK2/NRP1/ARHGAP24/B2M/CD9/CASK/DNM2/GSN/MSN/FGFR3/NDRG1/GDI2/ACTB/PARD3/ARHGAP31/ADAM10/RPLP2/SORBS1/DDR2/ITGA6/ITGB8/ITGAV/NEDD9/PTPRM/SDC4/DLG1/HSPA5/RPL19/FRMD5/GNA12/JAK1/RPLP1/YWHAE/RPL12/IQGAP1/FRS2/TNS3/RPL37A/RPS9/CAPN2/HSPA8/RPL31	63
BP	GO:0060548	negative regulation of cell death	80/442	427/5658	1.63556e-14	1.47746e-12	8.80716e-13	HSPA1A/APOE/HSPB1/MT3/HSPA1B/FGFR2/PRKCA/CLU/NR4A3/PTPRZ1/PDGFRB/MAP4K4/SEMA5A/CFL1/TCF7L2/CD38/NR4A2/ENO1/SLC7A11/LRP1/TMBIM1/CCL2/CNTFR/FYN/FGF2/GLI2/DUSP1/PHIP/CTNNA1/NRP1/SOX9/JUN/PSAP/ITCH/FAS/PRNP/LGALS3/UBB/RPS27A/STAT3/RPL10/SRSF6/ANGPT1/SORL1/MYO18A/GPR37L1/RGN/SOCS3/AQP1/FOXO1/HIP1R/IL6ST/PPARGC1A/ITGA6/CDC73/SH3RF1/ID1/YAP1/MEF2C/HIF1A/ITGAV/HIPK2/MERTK/UBC/RPS6/IFIT3/HSPA5/CHST11/STAM…	80
BP	GO:0048514	blood vessel morphogenesis	68/442	332/5658	2.32352e-14	2.05328e-12	1.22397e-12	APOE/HSPB1/FGFR2/GJA1/PRKCA/APOD/GLUL/PDGFRB/SEMA5A/PTN/MYO1E/AGT/ZFP36L1/LRP1/BMPR1A/NR4A1/CHI3L1/CCL2/SAT1/F3/FGF2/SULF1/ZMIZ1/CDH13/VAV3/NRP1/FN1/ARHGAP24/PIK3C2A/PRRX1/S100A1/PML/JUN/GAB1/SEMA3E/LAMA1/TGFB2/STAT3/FGF1/RAMP1/RNF213/WASF2/ANGPT1/AQP1/RBPJ/EPHB1/ITGB8/ID1/YAP1/HIF1A/ITGAV/SASH1/HIPK2/PTPRM/MFGE8/STAT1/VAV2/ADAMTS9/JAK1/S1PR1/FGFR1/PKD2/CTSH/THSD7A/HGF/TGFBR3/COL4A3/EPN2	68
BP	GO:0007417	central nervous system development	81/442	440/5658	3.04244e-14	2.63139e-12	1.56858e-12	HSP90AA1/MT3/ID2/FGFR2/STMN1/APOD/CLU/NR4A3/PTPRZ1/GABRB1/DNAJB1/SEMA5A/DLC1/PTN/NR4A2/STK3/SLC7A11/HES5/LRP1/BMPR1A/FYN/GLI2/PRKG1/NLGN4X/DAB1/NRP1/SERPINE2/SOX9/B2M/S100A1/CD9/ZEB1/GSN/UBB/STAT3/PTPRG/SYT1/PTBP2/INTU/OPHN1/MBP/ACTB/NCAN/NDRG2/GPR37L1/S100B/NCOA6/BCAN/TACC1/JARID2/AQP1/RBPJ/IL6ST/PPARGC1A/EPHB1/LHX2/ID1/NRG1/WLS/HIF1A/ID4/ATP2B4/ATM/DDIT4/HSPA5/NR1D1/HNRNPD/NFIB/GNAO1/S1PR1/VCAN…	81
BP	GO:0043069	negative regulation of programmed cell death	75/442	391/5658	3.48003e-14	2.94715e-12	1.7568e-12	HSPA1A/APOE/HSPB1/MT3/HSPA1B/FGFR2/PRKCA/CLU/NR4A3/PTPRZ1/PDGFRB/MAP4K4/SEMA5A/CFL1/TCF7L2/CD38/NR4A2/ENO1/LRP1/TMBIM1/CCL2/CNTFR/FYN/GLI2/DUSP1/PHIP/CTNNA1/NRP1/SOX9/JUN/ITCH/FAS/PRNP/LGALS3/UBB/RPS27A/STAT3/RPL10/SRSF6/ANGPT1/MYO18A/RGN/SOCS3/AQP1/FOXO1/HIP1R/IL6ST/PPARGC1A/ITGA6/CDC73/SH3RF1/ID1/YAP1/MEF2C/HIF1A/ITGAV/HIPK2/MERTK/UBC/RPS6/IFIT3/HSPA5/CHST11/STAMBP/BCL6/YWHAE/TGFB3/IFI6/CTSH/BI…	75
CC	GO:0043005	neuron projection	79/441	447/5894	6.74241e-14	3.25134e-12	2.09764e-12	APOE/HSPB1/HSP90AA1/MT3/STMN1/FOS/APOD/CLU/GLUL/CAMK2G/CCK/GABRB1/DOCK4/DNAJB1/NLGN1/IL1RAPL1/BMPR1B/LRP1/BMPR1A/ACTG1/MINK1/EPHA6/FYN/PREX1/GABRG1/NLGN4X/CDH13/DAB1/NRP1/S100A1/DNM2/FUS/PRNP/DSCAM/TGFB2/MYO10/UBB/RPL28/SYT1/PTBP2/OPHN1/MBP/ACTB/ADCY8/NDRG2/PARD3/ADAM10/ABI1/HIP1R/IL6ST/PPARGC1A/EPHB1/NRG1/WLS/HIF1A/CAMK2N1/SLC1A3/MERTK/ATP2B4/RPS6/STAT1/DLG1/DICER1/NR1D1/NFIB/GNAO1/MAP7/DNM3/YWH…	79
BP	GO:0061564	axon development	51/442	211/5658	6.74337e-14	5.59425e-12	3.33475e-12	APOE/HSP90AA1/MT3/FGFR2/STMN1/PRKCA/APOD/NR4A3/PTPRZ1/NRXN3/CCK/SEMA5A/PTN/NR4A2/TNC/BMPR1B/LRP1/GAB2/EPHA6/FYN/GLI2/TUBB2B/CTNNA1/DAB1/NRP1/FN1/JUN/GAB1/SEMA3E/DNM2/GFRA1/LAMA1/DSCAM/NEO1/OPHN1/ACTB/RPS6KA5/S100B/PARD3/EPHB1/LHX2/LGI1/NRXN1/PTPRM/S100A6/NFIB/DOK5/TIAM1/FRS2/TRAK1/PTCH1	51
BP	GO:0051093	negative regulation of developmental process	80/442	438/5658	7.13584e-14	5.80144e-12	3.45825e-12	APOE/MT3/ID2/GJA1/LDLRAD4/MAP4K4/SEMA5A/PTN/CD38/STK3/NLGN1/AGT/TOB2/ZFP36L1/MEIS2/HES5/LRP1/BMPR1A/ZFP36/PMP22/CXCL14/GLI2/SULF1/TOB1/CTNNA1/DAB1/NRP1/SOX9/B2M/PML/ZEB1/SEMA3E/EFEMP1/FGFR3/TGFB2/KANK1/DTX1/STAT3/PTPRG/SRSF6/UBASH3B/SORL1/GPR37L1/S100B/RGN/JARID2/FOXO1/RBPJ/PPARGC1A/EPHB1/LHX2/ABCA1/CDC73/ID1/NRG1/YAP1/HIF1A/ITGAV/PTPRM/ID4/WWTR1/STAT1/DICER1/NR1D1/APPL2/NFIB/NAMPT/ADAMTS9/EAF2/B…	80
BP	GO:1902533	positive regulation of intracellular signal transduction	85/442	486/5658	1.34388e-13	1.07115e-11	6.38518e-12	HSPA1A/APOE/HSP90AA1/MT3/HSPA1B/FGFR2/GJA1/PRKCA/MMD2/PDGFRB/MAP4K4/SEMA5A/TCF7L2/STK3/NLGN1/AGT/LIMS1/GADD45B/AKAP13/HES5/LRP1/MINK1/CHI3L1/TAOK3/CCL2/MAP3K5/FYN/F3/TNIK/FGF2/CDH13/NRP1/SOX9/JUN/PSAP/GAB1/PTPRJ/DDX5/BST2/FGFR3/TGFB2/UBB/RPS27A/STAT3/FGF1/RAP1B/ANGPT1/SPAG9/GPR37L1/S100B/MAP3K14/PLCE1/SOCS3/IL6ST/SH3RF1/NRG1/WLS/KSR1/GPRC5B/SASH1/HIPK2/UBC/ATM/ADORA2B/HIP1/C5/TPD52L1/IL6R/DOK5/TI…	85
BP	GO:0009725	response to hormone	75/442	407/5658	3.12274e-13	2.44114e-11	1.45517e-11	MT3/GJA1/FOS/NR4A3/APC/PDGFRB/GABRB1/PTN/CD38/NR4A2/AGT/TNC/ZFP36L1/AKAP13/ZFP36/NR4A1/JUND/FYN/CCND3/DUSP1/PHIP/NCOR2/WBP2/PIK3C2A/JUN/SLC27A1/GAB1/DDX5/MSN/TGFB2/SMARCC1/KANK1/STAT3/RAMP1/SST/EGR1/SRSF6/RAP1B/SORL1/TSC2/ADCY8/WFDC1/S100B/NCOA6/SOCS3/AQP1/FOXO1/SORBS1/PPARGC1A/YAP1/MEF2C/TADA3/ATP6V0E1/ATP2B4/DDIT4/STAT1/NR1D1/HNRNPD/APPL2/TXNIP/RERG/KAT2B/STAT2/TGFB3/IQGAP1/PRMT2/CTSH/AR/NCOA2/…	75
BP	GO:0043547	positive regulation of GTPase activity	45/442	179/5658	5.03892e-13	3.86475e-11	2.30379e-11	MAP4K4/DOCK4/PREX2/DLC1/ALDH1A1/ARHGEF10/DOCK1/LIMS1/RALGAPA2/AGAP1/CCL2/RGS20/RIN2/TBC1D22A/PREX1/VAV3/RGS6/NRP1/ARHGAP24/JUN/SRGAP1/OPHN1/GDI2/TSC2/RGS16/RGN/ARHGAP31/ITGA6/ARHGAP29/ASAP2/NEDD9/SIPA1L2/ARHGAP21/CHN2/GNAO1/SIPA1L3/S1PR1/ARHGAP17/TIAM1/IQGAP1/ARHGEF10L/MYO9B/DOCK5/RGL3/ARFGAP3	45
BP	GO:0032870	cellular response to hormone stimulus	59/442	282/5658	5.81484e-13	4.37728e-11	2.60931e-11	MT3/GJA1/FOS/NR4A3/APC/NR4A2/AGT/TNC/ZFP36L1/AKAP13/ZFP36/NR4A1/JUND/FYN/CCND3/DUSP1/PHIP/NCOR2/WBP2/PIK3C2A/JUN/SLC27A1/GAB1/DDX5/MSN/SMARCC1/KANK1/STAT3/RAMP1/SST/RAP1B/SORL1/TSC2/ADCY8/NCOA6/SOCS3/AQP1/FOXO1/SORBS1/PPARGC1A/YAP1/MEF2C/TADA3/ATP6V0E1/ATP2B4/DDIT4/STAT1/NR1D1/HNRNPD/APPL2/KAT2B/PRMT2/CTSH/AR/NCOA2/NR1H2/GHR/ARID1A/CFLAR	59
BP	GO:0043087	regulation of GTPase activity	50/442	215/5658	6.04325e-13	4.46651e-11	2.6625e-11	MAP4K4/DOCK4/PREX2/DLC1/ALDH1A1/ARHGEF10/DOCK1/LIMS1/RALGAPA2/AGAP1/CCL2/RGS20/RIN2/TBC1D22A/PREX1/PRKG1/VAV3/TNK2/RGS6/NRP1/ARHGAP24/JUN/SRGAP1/OPHN1/GDI2/TSC2/RGS16/RGN/ARHGAP31/ITGA6/ARHGAP29/ASAP2/NEDD9/SIPA1L2/ARHGAP21/VAV2/CHN2/GNAO1/SIPA1L3/S1PR1/BCL6/ARHGAP17/TIAM1/RICTOR/IQGAP1/ARHGEF10L/MYO9B/DOCK5/RGL3/ARFGAP3	50
CC	GO:0045202	synapse	75/441	434/5894	1.0857e-12	4.71192e-11	3.03995e-11	APOE/GPC6/MT3/FGFR2/CLU/PTPRD/GLUL/PTPRZ1/CADM1/CCK/GABRB1/DNAJB1/PTN/NLGN1/IL1RAPL1/ACTG1/MINK1/CPE/RPL8/FYN/TNIK/GABRG1/TUBB2B/NLGN4X/CDH13/RPS25/DAB1/NRP1/SERPINE2/TUBA1A/CASK/DNM2/FUS/PRNP/DSCAM/NDRG1/STAT3/SYT1/WASF2/OPHN1/GDI2/ACTB/TSC2/ADCY8/BCAN/ADAM10/RPLP2/ABI1/HIP1R/EPHB1/LGI1/NRXN1/NRG1/MEF2C/CAMK2N1/ATP2B4/ADORA2B/DLG1/RPL19/NR1D1/HIP1/IGSF11/HNRNPD/DNM3/YWHAE/TIAM1/RPL12/UTRN/SRI/AP…	75
BP	GO:0045597	positive regulation of cell differentiation	80/442	458/5658	8.86261e-13	6.43331e-11	3.83491e-11	HSPA1A/APOE/HSPA1B/ID2/FOS/PRKCA/MMD2/PTPRD/PTPRZ1/SEMA5A/PTN/TCF7L2/STK3/NLGN1/AGT/IL1RAPL1/DOCK1/LIMS1/ZFP36L1/BMPR1B/LRP1/BMPR1A/ZFP36/PRDM16/CUX1/MAP3K5/JUND/FYN/FGF2/GLI2/PREX1/ZMIZ1/TUBB2B/CTNNA1/DAB1/NRP1/SERPINE2/FN1/SOX9/JUN/ZEB1/DNM2/WIF1/DSCAM/TGFB2/STAT3/SYT1/SPAG9/SOCS3/RBPJ/IL6ST/DDR2/ITGA6/NRG1/GPRC5B/MEF2C/HIF1A/NEDD9/WWTR1/ZBTB7C/STAT1/HSPA5/DICER1/SH3PXD2B/ADAMTS9/IL6R/BCL6/TIAM…	80
BP	GO:0060322	head development	65/442	333/5658	1.00666e-12	7.07214e-11	4.21572e-11	MT3/ID2/FGFR2/STMN1/APOD/NR4A3/DNAJB1/SEMA5A/DLC1/PTN/NR4A2/SLC7A11/HES5/LRP1/BMPR1A/FYN/GLI2/PRKG1/NLGN4X/DAB1/NRP1/SERPINE2/SOX9/B2M/S100A1/CD9/UBB/PTPRG/SYT1/PTBP2/OPHN1/MBP/ACTB/NDRG2/GPR37L1/NCOA6/BCAN/TACC1/AQP1/RBPJ/PPARGC1A/LHX2/ID1/NRG1/WLS/HIF1A/ID4/ATP2B4/ATM/DDIT4/HSPA5/HNRNPD/NFIB/GNAO1/S1PR1/YWHAE/ASPH/TGFB3/FGFR1/TULP3/FRS2/NRG3/PTCH1/MYO16/ARID1A	65
BP	GO:0007420	brain development	62/442	309/5658	1.00906e-12	7.07214e-11	4.21572e-11	MT3/ID2/FGFR2/STMN1/APOD/NR4A3/DNAJB1/SEMA5A/DLC1/PTN/NR4A2/SLC7A11/HES5/LRP1/BMPR1A/FYN/GLI2/PRKG1/NLGN4X/DAB1/NRP1/SERPINE2/B2M/S100A1/CD9/UBB/PTPRG/SYT1/PTBP2/OPHN1/MBP/ACTB/NDRG2/GPR37L1/NCOA6/BCAN/TACC1/AQP1/RBPJ/PPARGC1A/LHX2/ID1/NRG1/WLS/HIF1A/ID4/ATP2B4/ATM/DDIT4/HSPA5/HNRNPD/NFIB/GNAO1/S1PR1/YWHAE/FGFR1/TULP3/FRS2/NRG3/PTCH1/MYO16/ARID1A	62
BP	GO:0042330	taxis	62/442	311/5658	1.36434e-12	9.38424e-11	5.59397e-11	HSPB1/ID2/TMSB4X/PRKCA/NR4A3/PDGFRB/NRXN3/DOCK4/SEMA5A/PTN/BMPR1B/LRP1/NR4A1/GAB2/CCL2/EPHA6/CXCL14/FYN/F3/FGF2/GLI2/PREX1/DUSP1/TUBB2B/CDH13/VAV3/DAB1/NRP1/GAB1/PTPRJ/SEMA3E/GFRA1/LAMA1/DSCAM/LGALS3/TGFB2/FGF1/NEO1/OPHN1/ANGPT1/TSC2/RPS6KA5/ADAM10/EPHB1/LHX2/LGI1/NRXN1/NRG1/ITGAV/PTPRM/NFIB/C5/IL6R/S1PR1/DOK5/TIAM1/FGFR1/FRS2/HGF/NRG3/PTCH1/DDT	62
BP	GO:0051960	regulation of nervous system development	74/442	410/5658	1.38513e-12	9.38424e-11	5.59397e-11	APOE/MT3/ID2/MMD2/PTPRD/PTPRZ1/MAP4K4/SEMA5A/PTN/CFL1/CD38/NLGN1/AGT/IL1RAPL1/HES5/LRP1/BMPR1A/PMP22/CUX1/FYN/TNIK/GLI2/PREX1/TUBB2B/CTNNA1/DAB1/NRP1/SERPINE2/FN1/SOX9/B2M/PRRX1/ZEB1/SEMA3E/DNM2/DSCAM/KANK1/DTX1/STAT3/PTPRG/SYT1/SORL1/SPAG9/GPR37L1/S100B/PARD3/ADAM10/IL6ST/EPHB1/LHX2/ITGA6/NRXN1/ID1/NRG1/YAP1/GPRC5B/MEF2C/HIF1A/ID4/DLG1/HSPA5/DICER1/NR1D1/APPL2/BCL6/DNM3/TIAM1/IQGAP1/FGFR1/TULP3/…	74
BP	GO:0007409	axonogenesis	46/442	191/5658	1.4499e-12	9.66202e-11	5.75956e-11	APOE/HSP90AA1/MT3/FGFR2/STMN1/PRKCA/NR4A3/PTPRZ1/NRXN3/CCK/SEMA5A/NR4A2/BMPR1B/LRP1/GAB2/EPHA6/FYN/GLI2/TUBB2B/DAB1/NRP1/FN1/GAB1/SEMA3E/DNM2/GFRA1/LAMA1/DSCAM/NEO1/OPHN1/ACTB/RPS6KA5/S100B/PARD3/EPHB1/LHX2/LGI1/NRXN1/PTPRM/S100A6/NFIB/DOK5/TIAM1/FRS2/TRAK1/PTCH1	46
BP	GO:0043410	positive regulation of MAPK cascade	54/442	251/5658	1.9267e-12	1.26323e-10	7.53017e-11	APOE/MT3/FGFR2/PRKCA/PDGFRB/STK3/GADD45B/AKAP13/LRP1/MINK1/CHI3L1/TAOK3/CCL2/MAP3K5/TNIK/FGF2/NRP1/JUN/PSAP/PTPRJ/FGFR3/TGFB2/UBB/RPS27A/FGF1/RAP1B/ANGPT1/SPAG9/GPR37L1/MAP3K14/PLCE1/SH3RF1/NRG1/KSR1/SASH1/HIPK2/UBC/ADORA2B/C5/TPD52L1/DOK5/TIAM1/TGFB3/IQGAP1/FGFR1/FRS2/TAB2/PDGFC/HGF/AR/ADORA1/DDT/GHR/CFLAR	54
BP	GO:0051271	negative regulation of cellular component movement	40/442	152/5658	2.21756e-12	1.43085e-10	8.52936e-11	APOE/APOD/LDLRAD4/SEMA5A/DLC1/PTN/LRP1/BMPR1A/CCL2/FGF2/DUSP1/SULF1/PRKG1/CTNNA1/NRP1/CD9/MCC/PTPRJ/SRGAP1/SEMA3E/BST2/IL33/KANK1/STAT3/PTPRG/RGN/PTPRT/PPARGC1A/NRG1/MEF2C/PTPRM/DACH1/FRMD5/C5/ADAMTS9/NRG3/ADORA1/TGFBR3/FBLN1/DDT	40
BP	GO:0060284	regulation of cell development	74/442	418/5658	3.78042e-12	2.40116e-10	1.43134e-10	APOE/MT3/ID2/MMD2/PTPRD/PTPRZ1/MAP4K4/SEMA5A/PTN/CFL1/CD38/NLGN1/AGT/IL1RAPL1/DOCK1/LIMS1/AKAP13/HES5/LRP1/BMPR1A/PMP22/CUX1/FYN/TNIK/GLI2/PREX1/TUBB2B/CTNNA1/DAB1/NRP1/SERPINE2/FN1/SOX9/B2M/PRRX1/ZEB1/SEMA3E/DNM2/DSCAM/KANK1/DTX1/STAT3/PTPRG/SYT1/SORL1/SPAG9/GPR37L1/ADAM10/IL6ST/LHX2/ITGA6/ID1/NRG1/YAP1/GPRC5B/MEF2C/HIF1A/NEDD9/ID4/HSPA5/DICER1/NR1D1/APPL2/BCL6/DNM3/TIAM1/IQGAP1/FGFR1/TRAK1/HGF/…	74
BP	GO:0006935	chemotaxis	61/442	310/5658	3.84821e-12	2.40661e-10	1.43459e-10	HSPB1/TMSB4X/PRKCA/NR4A3/PDGFRB/NRXN3/DOCK4/SEMA5A/PTN/BMPR1B/LRP1/NR4A1/GAB2/CCL2/EPHA6/CXCL14/FYN/F3/FGF2/GLI2/PREX1/DUSP1/TUBB2B/CDH13/VAV3/DAB1/NRP1/GAB1/PTPRJ/SEMA3E/GFRA1/LAMA1/DSCAM/LGALS3/TGFB2/FGF1/NEO1/OPHN1/ANGPT1/TSC2/RPS6KA5/ADAM10/EPHB1/LHX2/LGI1/NRXN1/NRG1/ITGAV/PTPRM/NFIB/C5/IL6R/S1PR1/DOK5/TIAM1/FGFR1/FRS2/HGF/NRG3/PTCH1/DDT	61
BP	GO:0050767	regulation of neurogenesis	68/442	368/5658	4.22093e-12	2.59971e-10	1.54969e-10	APOE/MT3/ID2/MMD2/PTPRD/PTPRZ1/MAP4K4/SEMA5A/PTN/CFL1/CD38/NLGN1/AGT/IL1RAPL1/HES5/LRP1/BMPR1A/PMP22/CUX1/FYN/TNIK/GLI2/PREX1/TUBB2B/CTNNA1/DAB1/NRP1/SERPINE2/FN1/SOX9/B2M/PRRX1/ZEB1/SEMA3E/DNM2/DSCAM/KANK1/DTX1/STAT3/PTPRG/SYT1/SORL1/SPAG9/GPR37L1/ADAM10/IL6ST/LHX2/ITGA6/ID1/NRG1/YAP1/GPRC5B/MEF2C/HIF1A/ID4/HSPA5/DICER1/NR1D1/APPL2/BCL6/DNM3/TIAM1/IQGAP1/FGFR1/TRAK1/HGF/NRG3/CFLAR	68
BP	GO:0032147	activation of protein kinase activity	39/442	150/5658	6.41267e-12	3.89067e-10	2.31924e-10	MT3/MAP4K4/STK3/AGT/GADD45B/MINK1/CHI3L1/TAOK3/MAP3K5/TNIK/FGF2/PRNP/TGFB2/UBB/RPS27A/FGF1/ANGPT1/SPAG9/ADCY8/MAP3K14/PLCE1/NRG1/GPRC5B/UBC/ADORA2B/DLG1/C5/IL6R/RPLP1/RICTOR/STK10/TGFB3/FRS2/TAB2/PDGFC/HGF/NRG3/ADORA1/GHR	39
BP	GO:0007178	transmembrane receptor protein serine/threonine kinase signaling pathway	40/442	158/5658	8.50506e-12	5.08428e-10	3.03075e-10	HSPA1A/FOS/LDLRAD4/BMPR1B/HES5/SMURF2/BMPR1A/RBPMS/PRDM16/ZFYVE16/SULF1/LTBP1/TOB1/ZNF423/PML/JUN/DDX5/ZEB1/DNM2/TGFB2/UBB/RPS27A/EGR1/NEO1/SORL1/PARD3/FUT8/RBPJ/ID1/HIPK2/UBC/WWTR1/HSPA5/CHST11/APPL2/HTRA1/TGFB3/CHRDL1/FBN2/TGFBR3	40
BP	GO:0010942	positive regulation of cell death	62/442	324/5658	8.97581e-12	5.28792e-10	3.15215e-10	MT3/FOS/CLU/NR4A3/APC/PDGFRB/CCK/DLC1/PTN/STK3/AGT/GADD45B/AKAP13/BMPR1B/LRP1/CCL2/MAP3K5/FYN/F3/PREX1/DUSP1/CTNNA1/VAV3/PML/JUN/RPS6KA2/FAS/DNM2/GSN/PRNP/TGFB2/UBB/RPS27A/EGR1/EGLN3/CRADD/S100B/PPP2R1B/FOXO1/ADAM10/HIP1R/PPARGC1A/ITGA6/MEF2C/UBC/RPS6/ATM/DDIT4/VAV2/HIP1/TPD52L1/TXNIP/BCL6/ST18/YWHAE/TIAM1/TGFB3/PRMT2/CTSH/CAPN2/ADORA1/COL4A3	62
BP	GO:0044403	symbiont process	68/442	374/5658	9.23686e-12	5.36398e-10	3.19748e-10	HSPA1A/APOE/HSPA1B/RPS15/TFRC/CADM1/PLSCR1/CFL1/ZFP36/RPL18/CCL2/MAP3K5/PPIA/RPL8/FYN/RPS25/FN1/B2M/PML/JUN/TPR/ITCH/DDX5/GSN/MSN/SLC20A2/BST2/UBB/RPS27A/RPL28/STAT3/RPL10/WASF2/RPL23A/TSC2/RPL37/AQP1/RPLP2/ABI1/IL6ST/RPS24/ITGAV/HIPK2/UBC/RPS6/STAT1/DLG1/RPL19/POLR2L/RPS12/UBAP1/NUP160/VPS28/POLR2J/RPLP1/YWHAE/RPL12/RICTOR/KAT2B/STAT2/IQGAP1/MORC3/RPL37A/RPS9/FBLN1/HSPA8/RPL31/CFLAR	68
MF	GO:0051427	hormone receptor binding	28/438	81/5628	3.58943e-12	6.36388e-10	4.51095e-10	NR4A3/CCK/TCF7L2/NR4A2/TOB2/NR4A1/JUND/FYN/NCOR2/WBP2/DDX5/FUS/STAT3/NCOA6/TACC1/PPARGC1A/TADA3/HIF1A/STAT1/HMGN3/GNAO1/RERG/JAK1/PRMT2/NCOA2/BAZ2A/PRPF6/ARID1A	28
MF	GO:0005096	GTPase activator activity	34/438	117/5628	4.67074e-12	6.36388e-10	4.51095e-10	DOCK4/PREX2/DLC1/ALDH1A1/DOCK1/RALGAPA2/AGAP1/RGS20/RIN2/TBC1D22A/PREX1/VAV3/RGS6/NRP1/ARHGAP24/JUN/SRGAP1/OPHN1/GDI2/TSC2/RGS16/ARHGAP31/ARHGAP29/ASAP2/SIPA1L2/ARHGAP21/CHN2/SIPA1L3/ARHGAP17/IQGAP1/ARHGEF10L/MYO9B/DOCK5/ARFGAP3	34
BP	GO:1901701	cellular response to oxygen-containing compound	79/442	471/5658	1.12696e-11	6.45226e-10	3.84621e-10	MT3/FGFR2/FOS/PRKCA/CLU/NR4A3/APC/MAP4K4/PTN/NR4A2/AGT/TNC/ZFP36L1/ITPR2/LRP1/ZFP36/NR4A1/CCL2/MAP3K5/FYN/CCND3/PHIP/CTNNA1/SOX9/PIK3C2A/JUN/PSAP/GAB1/ZEB1/DNM2/MSN/PRNP/SMARCC1/KANK1/STAT3/EGR1/RAP1B/ACTB/SORL1/TSC2/ADCY8/GPR37L1/RGN/SOCS3/AQP1/FOXO1/SORBS1/PPARGC1A/ABCA1/CDC73/ID1/YAP1/MEF2C/HIF1A/SASH1/ATP6V0E1/ATP2B4/ATM/DDIT4/STAT1/HSPA5/NR1D1/HNRNPD/HMGN3/APPL2/NAMPT/TIAM1/KAT2B/PKD2/SRI/CA…	79
BP	GO:0007264	small GTPase mediated signal transduction	54/442	262/5658	1.16226e-11	6.56193e-10	3.91159e-10	APOE/STMN1/MMD2/PDGFRB/MAP4K4/DOCK4/PREX2/DLC1/CFL1/ARHGEF10/DOCK1/AKAP13/RALGAPA2/RIN2/FGF2/PREX1/PHACTR4/CDH13/VAV3/TNK2/DAB1/NRP1/ARHGAP24/JUN/SRGAP1/DNM2/TGFB2/KANK1/WASF2/RAP1B/OPHN1/GDI2/TSC2/PLCE1/ARHGAP31/ARHGAP29/ABCA1/NRG1/KSR1/SIPA1L2/ARHGAP21/VAV2/STAMBP/CHN2/GNA12/RERG/SIPA1L3/BCL6/ARHGAP17/TIAM1/ARHGEF10L/MYO9B/DOCK5/RGL3	54
BP	GO:0071560	cellular response to transforming growth factor beta stimulus	35/442	127/5658	1.35437e-11	7.54177e-10	4.49567e-10	HSPA1A/FGFR2/FOS/LDLRAD4/LIMS1/ZFP36L1/BMPR1B/SMURF2/BMPR1A/PRDM16/FYN/LTBP1/SOX9/PML/JUN/ZEB1/DNM2/TGFB2/UBB/RPS27A/PARD3/FUT8/PPARGC1A/ID1/MEF2C/HIPK2/UBC/HSPA5/CHST11/APPL2/HTRA1/TGFB3/FBN2/TGFBR3/CFLAR	35
BP	GO:0048589	developmental growth	55/442	271/5658	1.39963e-11	7.68853e-10	4.58315e-10	APOE/HSP90AA1/MT3/FGFR2/GJA1/APOD/PDGFRB/SEMA5A/PTN/STK3/AGT/TNC/ZFP36L1/AKAP13/BMPR1B/LRP1/BMPR1A/FGF2/GLI2/ZMIZ1/NLGN4X/NRP1/FN1/SOX9/PSAP/CD9/SEMA3E/DNM2/GSN/DSCAM/FGFR3/TGFB2/STAT3/FGF1/SYT1/JARID2/RBPJ/LHX2/DDR2/YAP1/MEF2C/WWTR1/ATM/CHST11/SH3PXD2B/S1PR1/TIAM1/IQGAP1/FGFR1/PRMT2/AR/TGFBR3/PTCH1/GHR/CFLAR	55
BP	GO:0001525	angiogenesis	56/442	279/5658	1.4269e-11	7.73381e-10	4.61015e-10	HSPB1/FGFR2/PRKCA/APOD/GLUL/PDGFRB/SEMA5A/PTN/AGT/NR4A1/CHI3L1/CCL2/SAT1/F3/FGF2/SULF1/CDH13/VAV3/NRP1/FN1/ARHGAP24/PIK3C2A/S100A1/PML/JUN/GAB1/SEMA3E/TGFB2/STAT3/FGF1/RAMP1/RNF213/WASF2/ANGPT1/AQP1/RBPJ/EPHB1/ITGB8/ID1/HIF1A/ITGAV/SASH1/HIPK2/PTPRM/MFGE8/STAT1/VAV2/ADAMTS9/JAK1/S1PR1/FGFR1/CTSH/THSD7A/HGF/COL4A3/EPN2	56
MF	GO:0044877	protein-containing complex binding	77/438	452/5628	7.85353e-12	8.56034e-10	6.06788e-10	APOE/HSP90AA1/PRKCA/GNA14/CLU/APC/PTPRZ1/PTN/CFL1/MYO1E/HMBOX1/LRP1/ANTXR1/NEAT1/FYN/FGF2/PHIP/CTNNA1/CDH13/NCOR2/FN1/CD9/TPR/ITCH/DDX5/DNM2/GSN/PRNP/LGALS3/MYO10/SMARCC1/FGF1/RAP1B/RPL23A/ACTB/SORL1/MYO18A/ADAM10/HIP1R/SORBS1/EPHB1/DDR2/ITGA6/ITGB8/ABCA1/ID1/NRG1/ITGAV/ATM/MFGE8/HP1BP3/HSPA5/HIP1/HMGN3/FRMD5/APPL2/GNAO1/GNA12/VPS28/RPLP1/YWHAE/RICTOR/UTRN/IQGAP1/TULP3/PRMT2/ADORA1/TGFBR3/PTCH1/F…	77
BP	GO:0016032	viral process	66/442	362/5658	1.7245e-11	9.22383e-10	5.49835e-10	HSPA1A/APOE/HSPA1B/RPS15/TFRC/CADM1/PLSCR1/CFL1/ZFP36/RPL18/CCL2/MAP3K5/PPIA/RPL8/FYN/RPS25/B2M/PML/JUN/TPR/ITCH/DDX5/GSN/MSN/SLC20A2/BST2/UBB/RPS27A/RPL28/STAT3/RPL10/WASF2/RPL23A/TSC2/RPL37/RPLP2/ABI1/IL6ST/RPS24/ITGAV/HIPK2/UBC/RPS6/STAT1/DLG1/RPL19/POLR2L/RPS12/UBAP1/NUP160/VPS28/POLR2J/RPLP1/YWHAE/RPL12/RICTOR/KAT2B/STAT2/IQGAP1/MORC3/RPL37A/RPS9/FBLN1/HSPA8/RPL31/CFLAR	66
BP	GO:0014070	response to organic cyclic compound	70/442	397/5658	1.95245e-11	1.02468e-09	6.10816e-10	GJA1/FOS/CLU/NR4A3/PDGFRB/GABRB1/PTN/CD38/NR4A2/AGT/TNC/SLC7A11/ZFP36L1/ITPR2/AKAP13/ZFP36/NR4A1/CCL2/JUND/GLI2/DUSP1/SLC3A2/CTNNA1/NCOR2/WBP2/JUN/DDX5/DNM2/GSN/MSN/TGFB2/STAT3/SST/EGR1/RAP1B/ACTB/ADCY8/WFDC1/S100B/NCOA6/AQP1/FOXO1/PPARGC1A/ITGA6/ABCA1/ID1/YAP1/ABCC4/MEF2C/TADA3/ATP2B4/DDIT4/STAT1/HSPA5/NR1D1/HNRNPD/GNAO1/NAMPT/TXNIP/TIAM1/TGFB3/PKD2/PRMT2/BIRC2/AR/NCOA2/PTCH1/NR1H2/ARID1A/CFLAR	70
BP	GO:0009628	response to abiotic stimulus	79/442	476/5658	1.96618e-11	1.02468e-09	6.10816e-10	HSPA1A/HSP90AA1/MT3/HSPA1B/ID2/GJA1/FOS/CAMK2G/PDGFRB/CCK/DNAJB1/PTN/CD38/NR4A2/ENO1/AGT/TNC/SLC7A11/ZFP36L1/ITPR2/MEIS2/CHI3L1/JUND/FYN/DUSP1/SERPINE2/SOX9/PML/JUN/SLC27A1/CD9/TPR/FAS/DNM2/TGFB2/UBB/RPS27A/NDRG1/FGF1/SST/EGR1/EGLN3/CRADD/S100B/MAP3K14/AQP1/FOXO1/RBPJ/PPARGC1A/EPHB1/NRXN1/YAP1/HIF1A/SLC1A3/HIPK2/UBC/ATP2B4/ATM/DDIT4/STAT1/HP1BP3/HSPA5/HNRNPD/APPL2/NAMPT/MAP7/TXNIP/NUP160/YWHAE/ST…	79
BP	GO:0071559	response to transforming growth factor beta	35/442	129/5658	2.20765e-11	1.13596e-09	6.7715e-10	HSPA1A/FGFR2/FOS/LDLRAD4/LIMS1/ZFP36L1/BMPR1B/SMURF2/BMPR1A/PRDM16/FYN/LTBP1/SOX9/PML/JUN/ZEB1/DNM2/TGFB2/UBB/RPS27A/PARD3/FUT8/PPARGC1A/ID1/MEF2C/HIPK2/UBC/HSPA5/CHST11/APPL2/HTRA1/TGFB3/FBN2/TGFBR3/CFLAR	35
BP	GO:0045596	negative regulation of cell differentiation	62/442	331/5658	2.3488e-11	1.19349e-09	7.11441e-10	APOE/MT3/ID2/LDLRAD4/MAP4K4/SEMA5A/PTN/CD38/NLGN1/TOB2/ZFP36L1/MEIS2/HES5/LRP1/BMPR1A/ZFP36/PMP22/CXCL14/GLI2/TOB1/CTNNA1/DAB1/NRP1/SOX9/B2M/ZEB1/SEMA3E/EFEMP1/TGFB2/KANK1/DTX1/STAT3/PTPRG/SRSF6/UBASH3B/SORL1/GPR37L1/S100B/FOXO1/RBPJ/EPHB1/LHX2/ABCA1/CDC73/ID1/NRG1/YAP1/ITGAV/ID4/WWTR1/STAT1/DICER1/NR1D1/APPL2/BCL6/DNM3/FRS2/NRG3/PTCH1/FBLN1/NR1H2/CFLAR	62
BP	GO:0040013	negative regulation of locomotion	39/442	156/5658	2.39627e-11	1.20257e-09	7.16855e-10	APOE/APOD/LDLRAD4/SEMA5A/DLC1/PTN/LRP1/BMPR1A/CCL2/FGF2/DUSP1/SULF1/PRKG1/CTNNA1/NRP1/PML/MCC/PTPRJ/SRGAP1/SEMA3E/BST2/IL33/KANK1/STAT3/PTPRG/RGN/PTPRT/PPARGC1A/NRG1/MEF2C/PTPRM/DACH1/FRMD5/C5/ADAMTS9/NRG3/ADORA1/FBLN1/DDT	39
BP	GO:0030155	regulation of cell adhesion	65/442	357/5658	2.67673e-11	1.32694e-09	7.90994e-10	PRKCA/APOD/TFRC/NR4A3/MAP4K4/SEMA5A/DLC1/PTN/TNC/DOCK1/LIMS1/LRP1/MINK1/CCL2/FYN/GLI2/PREX1/DUSP1/ZMIZ1/PRKG1/CDH13/VAV3/DAB1/NRP1/SERPINE2/FN1/SOX9/PML/CD9/CASK/PTPRJ/SEMA3E/DNM2/GSN/PRNP/LAMA1/DSCAM/LGALS3/TGFB2/MYO10/KANK1/DTX1/ANGPT1/MBP/UBASH3B/ADAM10/IL6ST/DDR2/ITGA6/ITGAV/NEDD9/SDC4/ATM/DLG1/FRMD5/IL6R/S1PR1/BCL6/UTRN/IQGAP1/AP3B1/ADAMTS18/DOCK5/FBLN1/HLA-E	65
BP	GO:0010243	response to organonitrogen compound	71/442	409/5658	2.92833e-11	1.43418e-09	8.54918e-10	APOE/GJA1/FOS/NR4A3/APC/GABRB1/PTN/CFL1/NR4A2/AGT/ZFP36L1/ITPR2/LRP1/NR4A1/JUND/FYN/CCND3/DUSP1/PHIP/CTNNA1/CDH13/NCOR2/SOX9/PIK3C2A/JUN/SLC27A1/GAB1/CD9/ZEB1/DNM2/GSN/PRNP/SMARCC1/KANK1/STAT3/SST/EGR1/SRSF6/RAP1B/ACTB/SORL1/TSC2/ADCY8/SOCS3/AQP1/FOXO1/SORBS1/PPARGC1A/ABCA1/ID1/ABCC4/MEF2C/ATP6V0E1/ATP2B4/STAT1/HSPA5/HNRNPD/APPL2/GNAO1/NAMPT/TIAM1/KAT2B/STAT2/IQGAP1/PKD2/BIRC2/CAPN2/PDGFC/TGFBR3/…	71
BP	GO:1901698	response to nitrogen compound	74/442	436/5658	3.20786e-11	1.55237e-09	9.25375e-10	APOE/MT3/GJA1/FOS/NR4A3/APC/GABRB1/PTN/CFL1/NR4A2/AGT/ZFP36L1/ITPR2/LRP1/NR4A1/MAP3K5/JUND/FYN/CCND3/DUSP1/SLC3A2/PHIP/CTNNA1/CDH13/NCOR2/SOX9/PIK3C2A/JUN/SLC27A1/GAB1/CD9/ZEB1/DNM2/GSN/PRNP/SMARCC1/KANK1/STAT3/SST/EGR1/SRSF6/RAP1B/ACTB/SORL1/TSC2/ADCY8/SOCS3/AQP1/FOXO1/SORBS1/PPARGC1A/ABCA1/ID1/ABCC4/MEF2C/ATP6V0E1/ATP2B4/STAT1/HSPA5/HNRNPD/APPL2/GNAO1/NAMPT/TIAM1/KAT2B/STAT2/IQGAP1/PKD2/BIRC2/C…	74
BP	GO:0044419	interspecies interaction between organisms	68/442	386/5658	4.14738e-11	1.98343e-09	1.18233e-09	HSPA1A/APOE/HSPA1B/RPS15/TFRC/CADM1/PLSCR1/CFL1/ZFP36/RPL18/CCL2/MAP3K5/PPIA/RPL8/FYN/RPS25/FN1/B2M/PML/JUN/TPR/ITCH/DDX5/GSN/MSN/SLC20A2/BST2/UBB/RPS27A/RPL28/STAT3/RPL10/WASF2/RPL23A/TSC2/RPL37/AQP1/RPLP2/ABI1/IL6ST/RPS24/ITGAV/HIPK2/UBC/RPS6/STAT1/DLG1/RPL19/POLR2L/RPS12/UBAP1/NUP160/VPS28/POLR2J/RPLP1/YWHAE/RPL12/RICTOR/KAT2B/STAT2/IQGAP1/MORC3/RPL37A/RPS9/FBLN1/HSPA8/RPL31/CFLAR	68
BP	GO:0097190	apoptotic signaling pathway	53/442	264/5658	5.29344e-11	2.50207e-09	1.49149e-09	HSPA1A/HSPB1/HSPA1B/PRKCA/CLU/CCK/TCF7L2/CD38/NR4A2/STK3/ENO1/AGT/BMPR1B/TMBIM1/MAP3K5/FYN/PHIP/CTNNA1/NRP1/PML/JUN/DDX5/FAS/GSN/LGALS3/FGFR3/TGFB2/IL33/UBB/SST/CRADD/PPP2R1B/HIP1R/ITGA6/SH3RF1/YAP1/HIF1A/ITGAV/HIPK2/ATM/DDIT4/HIP1/TPD52L1/IL6R/ST18/YWHAE/FGFR1/IFI6/CTSH/HGF/AR/ADORA1/CFLAR	53
BP	GO:2000146	negative regulation of cell motility	35/442	133/5658	5.66965e-11	2.6491e-09	1.57913e-09	APOE/APOD/LDLRAD4/DLC1/PTN/LRP1/BMPR1A/CCL2/FGF2/DUSP1/SULF1/PRKG1/CTNNA1/MCC/PTPRJ/SRGAP1/BST2/IL33/KANK1/STAT3/PTPRG/RGN/PTPRT/PPARGC1A/NRG1/MEF2C/PTPRM/DACH1/FRMD5/C5/ADAMTS9/NRG3/ADORA1/FBLN1/DDT	35
CC	GO:0030425	dendrite	45/441	213/5894	7.29772e-11	2.87928e-09	1.8576e-09	APOE/HSP90AA1/MT3/APOD/CLU/CCK/GABRB1/DNAJB1/NLGN1/IL1RAPL1/BMPR1B/LRP1/BMPR1A/MINK1/FYN/PREX1/GABRG1/NLGN4X/DNM2/FUS/PRNP/DSCAM/RPL28/OPHN1/ADCY8/ADAM10/HIP1R/IL6ST/PPARGC1A/EPHB1/WLS/CAMK2N1/RPS6/STAT1/DICER1/NR1D1/GNAO1/DNM3/TIAM1/SRI/TRAK1/CAPN2/ADORA1/PTCH1/HSPA8	45
CC	GO:0097447	dendritic tree	45/441	214/5894	8.61616e-11	3.11618e-09	2.01044e-09	APOE/HSP90AA1/MT3/APOD/CLU/CCK/GABRB1/DNAJB1/NLGN1/IL1RAPL1/BMPR1B/LRP1/BMPR1A/MINK1/FYN/PREX1/GABRG1/NLGN4X/DNM2/FUS/PRNP/DSCAM/RPL28/OPHN1/ADCY8/ADAM10/HIP1R/IL6ST/PPARGC1A/EPHB1/WLS/CAMK2N1/RPS6/STAT1/DICER1/NR1D1/GNAO1/DNM3/TIAM1/SRI/TRAK1/CAPN2/ADORA1/PTCH1/HSPA8	45
BP	GO:0048659	smooth muscle cell proliferation	26/442	79/5658	8.42029e-11	3.8459e-09	2.29255e-09	ID2/FGFR2/APOD/NR4A3/PDGFRB/TCF7L2/AGT/HES5/BMPR1A/MAP3K5/FGF2/PRKG1/CDH13/JUN/PDE1A/NDRG2/SF1/PPARGC1A/ABCC4/ELN/MEF2C/STAT1/NAMPT/IL6R/S1PR1/TGFB3	26
BP	GO:0048660	regulation of smooth muscle cell proliferation	26/442	79/5658	8.42029e-11	3.8459e-09	2.29255e-09	ID2/FGFR2/APOD/NR4A3/PDGFRB/TCF7L2/AGT/HES5/BMPR1A/MAP3K5/FGF2/PRKG1/CDH13/JUN/PDE1A/NDRG2/SF1/PPARGC1A/ABCC4/ELN/MEF2C/STAT1/NAMPT/IL6R/S1PR1/TGFB3	26
BP	GO:0090287	regulation of cellular response to growth factor stimulus	36/442	142/5658	9.51739e-11	4.29869e-09	2.56246e-09	HSPA1A/MT3/LDLRAD4/AGT/HES5/SMURF2/PRDM16/FGF2/SULF1/LTBP1/TOB1/ZNF423/CD63/CASK/ZEB1/DNM2/UBB/RPS27A/FGF1/NEO1/SORL1/RBPJ/HIF1A/HIPK2/UBC/HSPA5/CHST11/DOK5/HTRA1/TGFB3/FGFR1/CHRDL1/FBN2/TGFBR3/EPN2/CFLAR	36
BP	GO:0001655	urogenital system development	40/442	170/5658	9.99313e-11	4.46396e-09	2.66098e-09	ID2/FGFR2/PDGFRB/MYO1E/AGT/TNC/HES5/FGF2/GLI2/SULF1/NRP1/SOX9/PSAP/TGFB2/SMARCC1/FGF1/EGR1/ANGPT1/RGN/PLCE1/ITGA6/YAP1/MEF2C/ID4/WWTR1/SDC4/STAT1/DLG1/IL6R/EAF2/NUP160/IQGAP1/FGFR1/FRS2/PKD2/CTSH/AR/PTCH1/COL4A3/CFLAR	40
BP	GO:0072657	protein localization to membrane	51/442	254/5658	1.26241e-10	5.57792e-09	3.32501e-09	APOE/HSP90AA1/GPC6/RPS15/PTN/NLGN1/SLC7A11/LRP1/RPL18/CPE/TMBIM1/RPL8/FYN/TNIK/RPS25/GPC5/GSN/PRNP/LGALS3/RPS27A/RPL28/RAMP1/RPL10/RPL23A/ACTB/RPL37/PARD3/ADAM10/RPLP2/SORBS1/LGI1/NRXN1/RPS24/RPS6/DLG1/HSPA5/RPL19/RPS12/SH3PXD2B/MAP7/RPLP1/YWHAE/TIAM1/RPL12/PPP2R5A/RPL37A/RPS9/AR/ADORA1/PTCH1/RPL31	51
MF	GO:0035257	nuclear hormone receptor binding	24/438	68/5628	7.93981e-11	6.23132e-09	4.41698e-09	NR4A3/TCF7L2/NR4A2/TOB2/NR4A1/JUND/NCOR2/WBP2/DDX5/FUS/STAT3/NCOA6/TACC1/PPARGC1A/TADA3/HIF1A/STAT1/HMGN3/RERG/PRMT2/NCOA2/BAZ2A/PRPF6/ARID1A	24
MF	GO:0030695	GTPase regulator activity	35/438	135/5628	8.00353e-11	6.23132e-09	4.41698e-09	DOCK4/PREX2/DLC1/ALDH1A1/DOCK1/RALGAPA2/AGAP1/RGS20/RIN2/TBC1D22A/PREX1/VAV3/TNK2/RGS6/NRP1/ARHGAP24/JUN/SRGAP1/OPHN1/GDI2/TSC2/RGS16/ARHGAP31/ARHGAP29/ASAP2/SIPA1L2/ARHGAP21/CHN2/SIPA1L3/ARHGAP17/IQGAP1/ARHGEF10L/MYO9B/DOCK5/ARFGAP3	35
BP	GO:0040008	regulation of growth	52/442	264/5658	1.71749e-10	7.49973e-09	4.47061e-09	HSPA1A/APOE/MT3/HSPA1B/FGFR2/GJA1/SEMA5A/CD38/STK3/ENO1/AGT/LRP1/BMPR1A/FGF2/NRP1/SERPINE2/FN1/PML/ITCH/PTPRJ/SEMA3E/DNM2/DSCAM/BST2/FGFR3/TGFB2/STAT3/SYT1/WFDC1/PLCE1/JARID2/SOCS3/OSGIN2/ADAM10/RBPJ/LGI1/CDC73/YAP1/MEF2C/HIF1A/NEDD9/IGSF11/SH3PXD2B/RERG/EAF2/BCL6/FGFR1/NRG3/AR/TGFBR3/PTCH1/GHR	52
BP	GO:0050680	negative regulation of epithelial cell proliferation	24/442	70/5658	1.73425e-10	7.49973e-09	4.47061e-09	APOE/FGFR2/GJA1/PTN/CCL2/SULF1/SOX9/B2M/MCC/CASK/TGFB2/INTU/WFDC1/RGN/CDC73/MEF2C/PTPRM/STAT1/DLG1/NFIB/EAF2/AR/TGFBR3/PTCH1	24
BP	GO:0070997	neuron death	36/442	146/5658	2.22995e-10	9.54182e-09	5.68791e-09	APOE/MT3/FOS/CLU/NR4A3/PTPRZ1/NR4A2/SLC7A11/LRP1/CCL2/CNTFR/MAP3K5/FYN/NRP1/JUN/PRNP/TGFB2/UBB/STAT3/EGR1/ANGPT1/EGLN3/SORL1/PPARGC1A/EPHB1/MEF2C/HIF1A/HIPK2/ATM/DDIT4/HSPA5/STAMBP/NAMPT/TGFB3/CAPN2/ADORA1	36
BP	GO:0099173	postsynapse organization	22/442	60/5658	2.27997e-10	9.65426e-09	5.75493e-09	APOE/PTPRD/PTN/CFL1/NLGN1/IL1RAPL1/SLC7A11/ACTG1/FYN/NLGN4X/NRP1/PRNP/NDRG1/WASF2/OPHN1/ACTB/ADAM10/EPHB1/NRXN1/DLG1/DNM3/TIAM1	22
MF	GO:0060589	nucleoside-triphosphatase regulator activity	36/438	145/5628	1.61696e-10	1.10155e-08	7.80821e-09	DOCK4/DNAJB1/PREX2/DLC1/ALDH1A1/DOCK1/RALGAPA2/AGAP1/RGS20/RIN2/TBC1D22A/PREX1/VAV3/TNK2/RGS6/NRP1/ARHGAP24/JUN/SRGAP1/OPHN1/GDI2/TSC2/RGS16/ARHGAP31/ARHGAP29/ASAP2/SIPA1L2/ARHGAP21/CHN2/SIPA1L3/ARHGAP17/IQGAP1/ARHGEF10L/MYO9B/DOCK5/ARFGAP3	36
MF	GO:0005198	structural molecule activity	53/438	275/5628	2.26417e-10	1.37108e-08	9.71872e-09	APOE/RPS15/TNC/AKAP13/MPZL1/ACTG1/RPL18/CHI3L1/RPL8/LTBP1/TUBB2B/CTNNA1/RPS25/FN1/TUBA1A/TPR/MSN/LAMA1/EFEMP1/RPS27A/RPL28/RPL10/MBP/RPL23A/ACTB/RPL37/SPAG9/RPLP2/RPS24/SH3RF1/KSR1/ELN/RPS6/MFGE8/DLG1/RPL19/HIP1/RPS12/MAP7/NUP160/DNM3/VCAN/RPLP1/RPL12/ASPH/SPON1/TUBA1B/RPL37A/RPS9/FBN2/FBLN1/COL4A3/RPL31	53
BP	GO:0045664	regulation of neuron differentiation	53/442	277/5658	3.48033e-10	1.45851e-08	8.69422e-09	APOE/MT3/ID2/MMD2/PTPRD/MAP4K4/SEMA5A/PTN/CFL1/CD38/NLGN1/AGT/IL1RAPL1/HES5/LRP1/PMP22/CUX1/FYN/TNIK/GLI2/PREX1/TUBB2B/DAB1/NRP1/FN1/SOX9/B2M/PRRX1/ZEB1/SEMA3E/DNM2/DSCAM/KANK1/DTX1/PTPRG/SYT1/SPAG9/GPR37L1/ADAM10/ITGA6/ID1/GPRC5B/MEF2C/ID4/HSPA5/BCL6/DNM3/TIAM1/IQGAP1/FGFR1/TRAK1/HGF/CFLAR	53
BP	GO:0043065	positive regulation of apoptotic process	55/442	294/5658	3.80495e-10	1.57828e-08	9.40815e-09	CLU/NR4A3/APC/PDGFRB/CCK/DLC1/PTN/STK3/AGT/GADD45B/AKAP13/BMPR1B/CCL2/MAP3K5/F3/PREX1/DUSP1/CTNNA1/VAV3/PML/JUN/RPS6KA2/FAS/DNM2/GSN/PRNP/TGFB2/UBB/RPS27A/EGLN3/CRADD/S100B/PPP2R1B/FOXO1/ADAM10/HIP1R/PPARGC1A/ITGA6/MEF2C/UBC/RPS6/ATM/VAV2/HIP1/TPD52L1/TXNIP/BCL6/ST18/YWHAE/TIAM1/TGFB3/PRMT2/CTSH/CAPN2/COL4A3	55
CC	GO:0098978	glutamatergic synapse	31/441	121/5894	5.36017e-10	1.78947e-08	1.1545e-08	APOE/GPC6/PTPRD/DNAJB1/NLGN1/IL1RAPL1/FYN/TNIK/NLGN4X/NRP1/DNM2/NDRG1/STAT3/SYT1/OPHN1/ACTB/ADCY8/BCAN/ADAM10/EPHB1/LGI1/NRXN1/NRG1/ATP2B4/ADORA2B/DLG1/HIP1/DNM3/YWHAE/TIAM1/NRG3	31
BP	GO:1901214	regulation of neuron death	34/442	136/5658	4.86663e-10	1.99827e-08	1.19117e-08	APOE/MT3/FOS/CLU/NR4A3/PTPRZ1/NR4A2/SLC7A11/LRP1/CCL2/CNTFR/MAP3K5/FYN/NRP1/JUN/PRNP/TGFB2/UBB/STAT3/EGR1/ANGPT1/EGLN3/SORL1/PPARGC1A/EPHB1/MEF2C/HIF1A/HIPK2/ATM/DDIT4/STAMBP/TGFB3/CAPN2/ADORA1	34
BP	GO:0080135	regulation of cellular response to stress	55/442	296/5658	4.96617e-10	2.01875e-08	1.20338e-08	HSPA1A/HSPB1/HSP90AA1/HSPA1B/CLU/NR4A3/CAMK2G/MAP4K4/DNAJB1/PTN/STK3/ENO1/SLC7A11/GADD45B/LRP1/BMPR1A/MINK1/TAOK3/MAP3K5/FYN/TNIK/DUSP1/B2M/PRRX1/PML/PSAP/TPR/ITCH/DDX5/FAS/FUS/TGFB2/SPAG9/ADCY8/GPR37L1/RGN/FUT8/FOXO1/EPHB1/SH3RF1/HIF1A/SASH1/HIPK2/ATM/DLG1/HSPA5/NAMPT/TPD52L1/BCL6/NUP160/YWHAE/TIAM1/HGF/HSPA8/PRDX1	55
BP	GO:0043068	positive regulation of programmed cell death	55/442	297/5658	5.66696e-10	2.28081e-08	1.3596e-08	CLU/NR4A3/APC/PDGFRB/CCK/DLC1/PTN/STK3/AGT/GADD45B/AKAP13/BMPR1B/CCL2/MAP3K5/F3/PREX1/DUSP1/CTNNA1/VAV3/PML/JUN/RPS6KA2/FAS/DNM2/GSN/PRNP/TGFB2/UBB/RPS27A/EGLN3/CRADD/S100B/PPP2R1B/FOXO1/ADAM10/HIP1R/PPARGC1A/ITGA6/MEF2C/UBC/RPS6/ATM/VAV2/HIP1/TPD52L1/TXNIP/BCL6/ST18/YWHAE/TIAM1/TGFB3/PRMT2/CTSH/CAPN2/COL4A3	55
BP	GO:0051272	positive regulation of cellular component movement	54/442	289/5658	5.86292e-10	2.33655e-08	1.39282e-08	HSPB1/TMSB4X/STMN1/PRKCA/NR4A3/APC/PDGFRB/MAP4K4/DOCK4/SEMA5A/PTN/AGT/DOCK1/LRP1/SMURF2/CXCL14/F3/FGF2/PREX1/TUBB2B/CDH13/NRP1/FN1/SOX9/PIK3C2A/JUN/GAB1/SEMA3E/DSCAM/LGALS3/TGFB2/STAT3/FGF1/ANGPT1/SPAG9/ADAM10/DDR2/ITGA6/HIF1A/ITGAV/SASH1/NEDD9/ATM/HSPA5/IL6R/S1PR1/BCL6/TIAM1/IQGAP1/FGFR1/CTSH/PDGFC/HGF/DOCK5	54
BP	GO:0001667	ameboidal-type cell migration	43/442	204/5658	8.24705e-10	3.25478e-08	1.94018e-08	APOE/HSPB1/TMSB4X/PRKCA/GLUL/MAP4K4/SEMA5A/PTN/CFL1/AGT/DOCK1/SMURF2/NR4A1/FGF2/PHACTR4/CDH13/NRP1/FN1/SOX9/PIK3C2A/PML/JUN/MCC/SEMA3E/TGFB2/KANK1/FGF1/PTPRG/WASF2/ANGPT1/DDR2/ID1/MEF2C/HIF1A/SASH1/PTPRM/SDC4/APPL2/GNA12/ADAMTS9/FGFR1/CTSH/DOCK5	43
BP	GO:0071417	cellular response to organonitrogen compound	48/442	247/5658	1.48914e-09	5.82054e-08	3.46964e-08	NR4A3/APC/GABRB1/NR4A2/AGT/ZFP36L1/ITPR2/LRP1/NR4A1/FYN/CCND3/PHIP/CTNNA1/SOX9/PIK3C2A/GAB1/ZEB1/DNM2/PRNP/SMARCC1/KANK1/STAT3/EGR1/RAP1B/ACTB/SORL1/TSC2/ADCY8/SOCS3/AQP1/FOXO1/SORBS1/PPARGC1A/ID1/MEF2C/ATP6V0E1/ATP2B4/STAT1/HSPA5/HNRNPD/APPL2/NAMPT/KAT2B/PKD2/CAPN2/PDGFC/GHR/CFLAR	48
BP	GO:0007179	transforming growth factor beta receptor signaling pathway	27/442	95/5658	1.51547e-09	5.86702e-08	3.49735e-08	HSPA1A/FOS/LDLRAD4/BMPR1B/SMURF2/BMPR1A/PRDM16/LTBP1/PML/JUN/ZEB1/DNM2/TGFB2/UBB/RPS27A/PARD3/FUT8/ID1/HIPK2/UBC/HSPA5/CHST11/APPL2/HTRA1/TGFB3/FBN2/TGFBR3	27
BP	GO:0051056	regulation of small GTPase mediated signal transduction	37/442	163/5658	1.54656e-09	5.93092e-08	3.53544e-08	APOE/STMN1/MMD2/PDGFRB/MAP4K4/PREX2/DLC1/ARHGEF10/AKAP13/RALGAPA2/PREX1/VAV3/NRP1/ARHGAP24/SRGAP1/DNM2/TGFB2/KANK1/OPHN1/GDI2/TSC2/PLCE1/ARHGAP31/ARHGAP29/ABCA1/NRG1/SIPA1L2/ARHGAP21/VAV2/STAMBP/CHN2/SIPA1L3/BCL6/ARHGAP17/TIAM1/ARHGEF10L/MYO9B	37
BP	GO:0051129	negative regulation of cellular component organization	52/442	280/5658	1.58415e-09	6.01829e-08	3.58752e-08	HSPA1A/APOE/MT3/HSPA1B/TMSB4X/STMN1/APOD/CLU/APC/LDLRAD4/MAP4K4/DNAJB1/SEMA5A/DLC1/PTN/CD38/NLGN1/LRP1/ANTXR1/PMP22/FYN/DUSP1/DAB1/NRP1/B2M/TPR/SEMA3E/DNM2/GSN/PRNP/LGALS3/TET1/KANK1/PTPRG/WASF2/SORL1/TSC2/JARID2/HIP1R/PPARGC1A/ID1/ATM/S1PR1/DNM3/KAT2B/BIRC2/HGF/AR/FBLN1/HSPA8/NR1H2/CFLAR	52
BP	GO:0042493	response to drug	68/442	420/5658	1.91324e-09	7.20121e-08	4.29266e-08	MT3/FGFR2/GJA1/FOS/APOD/TFRC/NR4A3/PDGFRB/GABRB1/PTN/CD38/NR4A2/AGT/TNC/SLC7A11/ITPR2/MAP3K5/JUND/FYN/DUSP1/CTNNA1/VAV3/DAB1/WBP2/SOX9/B2M/JUN/PSAP/DNM2/GSN/PRNP/TGFB2/STAT3/SST/EGR1/SYT1/RAP1B/ACTB/ADCY8/GPR37L1/WFDC1/AQP1/FOXO1/ADAM10/PPARGC1A/ABCA1/ID1/YAP1/ABCC4/MEF2C/SLC1A3/PTPRM/ATP2B4/DDIT4/STAT1/HSPA5/HNRNPD/GNAO1/GNA12/TXNIP/TIAM1/TGFB3/BIRC2/CAPN2/HGF/NCOA2/PTCH1/CFLAR	68
BP	GO:0006605	protein targeting	35/442	150/5658	2.00323e-09	7.47076e-08	4.45334e-08	HSP90AA1/RPS15/CLU/NLGN1/RPL18/RPL8/FYN/ZFYVE16/RPS25/PRNP/UBB/RPS27A/RPL28/RPL10/RPL23A/SORL1/RPL37/PARD3/RPLP2/RPS24/UBC/RPS6/HSPA5/RPL19/RPS12/RPLP1/YWHAE/RPL12/RPL37A/AP3B1/TRAK1/RPS9/ADORA1/HSPA8/RPL31	35
BP	GO:1901699	cellular response to nitrogen compound	50/442	266/5658	2.19259e-09	8.10263e-08	4.83e-08	MT3/NR4A3/APC/GABRB1/NR4A2/AGT/ZFP36L1/ITPR2/LRP1/NR4A1/MAP3K5/FYN/CCND3/PHIP/CTNNA1/SOX9/PIK3C2A/GAB1/ZEB1/DNM2/PRNP/SMARCC1/KANK1/STAT3/EGR1/RAP1B/ACTB/SORL1/TSC2/ADCY8/SOCS3/AQP1/FOXO1/SORBS1/PPARGC1A/ID1/MEF2C/ATP6V0E1/ATP2B4/STAT1/HSPA5/HNRNPD/APPL2/NAMPT/KAT2B/PKD2/CAPN2/PDGFC/GHR/CFLAR	50
CC	GO:0022626	cytosolic ribosome	21/441	65/5894	3.91223e-09	1.21279e-07	7.82447e-08	RPS15/APOD/RPL18/RPL8/RPS25/RPS27A/RPL28/RPL10/RPL23A/RPL37/RPLP2/PPARGC1A/RPS24/RPS6/RPL19/RPS12/RPLP1/RPL12/RPL37A/RPS9/RPL31	21
BP	GO:0006402	mRNA catabolic process	34/442	146/5658	3.63685e-09	1.33187e-07	7.93933e-08	HSPA1A/HSPB1/HSPA1B/PRKCA/RPS15/ZFP36L1/ZFP36/RPL18/RPL8/TOB1/RPS25/DDX5/HNRNPM/UBB/RPS27A/RPL28/RPL10/RPL23A/RPL37/RPLP2/RPS24/UBC/RPS6/ATM/DCP1B/RPL19/HNRNPD/RPS12/RPLP1/RPL12/RPL37A/RPS9/HSPA8/RPL31	34
CC	GO:0030424	axon	42/441	216/5894	4.76964e-09	1.38002e-07	8.90333e-08	HSPB1/HSP90AA1/MT3/GLUL/CCK/IL1RAPL1/LRP1/ACTG1/MINK1/PREX1/NRP1/DNM2/DSCAM/TGFB2/SYT1/PTBP2/OPHN1/MBP/ACTB/ADCY8/NDRG2/PARD3/ABI1/EPHB1/NRG1/HIF1A/STAT1/DLG1/DICER1/NFIB/MAP7/DNM3/YWHAE/TIAM1/UTRN/IQGAP1/SRI/AP3B1/TRAK1/ADORA1/PTCH1/HSPA8	42
BP	GO:0071407	cellular response to organic cyclic compound	47/442	246/5658	4.00704e-09	1.45434e-07	8.66937e-08	CLU/NR4A3/GABRB1/PTN/NR4A2/TNC/ZFP36L1/ITPR2/AKAP13/ZFP36/NR4A1/CCL2/GLI2/CTNNA1/NCOR2/WBP2/DDX5/DNM2/MSN/STAT3/EGR1/RAP1B/ACTB/ADCY8/NCOA6/AQP1/FOXO1/PPARGC1A/ITGA6/ABCA1/ID1/YAP1/MEF2C/TADA3/ATP2B4/DDIT4/STAT1/HSPA5/NR1D1/HNRNPD/PKD2/PRMT2/AR/PTCH1/NR1H2/ARID1A/CFLAR	47
BP	GO:0051050	positive regulation of transport	66/442	410/5658	4.39334e-09	1.58044e-07	9.42103e-08	APOE/GJA1/TMSB4X/CLU/GLUL/NR4A3/PDGFRB/CADM1/CCK/TCF7L2/CD38/NLGN1/AGT/LRP1/TF/GAB2/CCL2/PPIA/FYN/B2M/S100A1/CD63/CASK/TPR/PTPRJ/DNM2/MSN/PRNP/LGALS3/TGFB2/IL33/SYT1/ANGPT1/MBP/ACTB/SORL1/FGF12/MYO18A/ADCY8/RGN/AQP1/HIP1R/SORBS1/ABCA1/WLS/HIF1A/ITGAV/MERTK/SDC4/ADORA2B/MFGE8/DLG1/HIP1/APPL2/C5/DNM3/VPS28/YWHAE/TGFB3/FGFR1/PKD2/SRI/ADORA1/PTCH1/NR1H2/HLA-E	66
BP	GO:0030336	negative regulation of cell migration	31/442	126/5658	4.45927e-09	1.58743e-07	9.46273e-08	APOE/APOD/LDLRAD4/DLC1/PTN/LRP1/BMPR1A/CCL2/FGF2/DUSP1/SULF1/PRKG1/MCC/PTPRJ/SRGAP1/BST2/IL33/KANK1/STAT3/PTPRG/PTPRT/PPARGC1A/NRG1/MEF2C/PTPRM/DACH1/C5/ADAMTS9/NRG3/ADORA1/DDT	31
BP	GO:0072594	establishment of protein localization to organelle	39/442	184/5658	4.49089e-09	1.58743e-07	9.46273e-08	HSP90AA1/RPS15/APOD/CLU/AGT/RPL18/RPL8/ZFYVE16/RPS25/PML/TPR/UBB/RPS27A/RPL28/STAT3/RPL10/ANGPT1/RPL23A/SORL1/TSC2/RPL37/RPLP2/RPS24/UBC/RPS6/HSPA5/RPL19/APPL2/RPS12/TXNIP/VPS28/RPLP1/YWHAE/RPL12/RPL37A/AP3B1/RPS9/HSPA8/RPL31	39
MF	GO:0019900	kinase binding	55/438	312/5628	3.23996e-09	1.76578e-07	1.25165e-07	HSPB1/HSP90AA1/GJA1/NR4A3/APC/PDGFRB/PEBP1/DOCK4/PTN/TCF7L2/LIMS1/AKAP13/ZFP36/GAB2/MAP3K5/CCND3/DUSP1/TOB1/NRP1/SOX9/TPR/PTPRJ/FAS/DNM2/MSN/DSCAM/CCNY/STAT3/ANGPT1/ACTB/SPAG9/ADAM10/SH3RF1/NRG1/KSR1/GPRC5B/HIF1A/CAMK2N1/ITGAV/SASH1/NEDD9/ATP2B4/RPS6/SDC4/DLG1/FRMD5/TIAM1/RICTOR/UTRN/PPP2R5A/KAT2B/IQGAP1/FRS2/NRG3/GHR	55
MF	GO:0046983	protein dimerization activity	74/438	484/5628	3.87432e-09	1.83865e-07	1.3033e-07	APOE/HSPB1/HSP90AA1/ID2/FGFR2/FOS/TFRC/NR4A3/CAMK2G/CADM1/NR4A2/STK3/NLGN1/ENO1/HES5/BMPR1A/RBPMS/RALGAPA2/NR4A1/MAP3K5/TBC1D22A/TUBB2B/NLGN4X/CTNNA1/CDH13/SOX9/B2M/S100A1/PML/JUN/SLC27A1/PSAP/TPR/BST2/TGFB2/STAT3/SYT1/TSC2/ADCY8/S100B/ADAM10/PTPRT/HIP1R/IL6ST/ID1/YAP1/MEF2C/HIF1A/S100A6/ID4/WWTR1/ATM/STAT1/HIP1/APPL2/NAMPT/TPD52L1/IL6R/POLR2J/YWHAE/STK10/TGFB3/FGFR1/PKD2/PRMT2/SRI/CAPN2/PDGFC/HG…	74
MF	GO:0019901	protein kinase binding	51/438	280/5628	4.0484e-09	1.83865e-07	1.3033e-07	HSPB1/HSP90AA1/GJA1/NR4A3/APC/PDGFRB/PEBP1/DOCK4/PTN/TCF7L2/LIMS1/ZFP36/GAB2/MAP3K5/CCND3/DUSP1/TOB1/NRP1/SOX9/TPR/PTPRJ/DNM2/MSN/DSCAM/CCNY/STAT3/ANGPT1/ACTB/SPAG9/ADAM10/NRG1/KSR1/GPRC5B/HIF1A/CAMK2N1/ITGAV/SASH1/NEDD9/ATP2B4/RPS6/SDC4/DLG1/FRMD5/TIAM1/RICTOR/UTRN/KAT2B/IQGAP1/FRS2/NRG3/GHR	51
BP	GO:1905114	cell surface receptor signaling pathway involved in cell-cell signaling	47/442	248/5658	5.27279e-09	1.84775e-07	1.10145e-07	APOE/GPC6/FGFR2/APC/SEMA5A/TCF7L2/NR4A2/STK3/NLGN1/LRP1/SMURF2/CPE/TNIK/GLI2/SULF1/NLGN4X/GPC5/SOX9/MCC/WIF1/UBB/RPS27A/KANK1/CCNY/EGR1/RNF213/CSNK1A1/TSC2/NDRG2/FOXO1/RBPJ/NRXN1/CDC73/WLS/YAP1/GPRC5B/MEF2C/MERTK/ZNRF3/UBC/WWTR1/TBL1X/IGSF11/GNAO1/TIAM1/PKD2/ADORA1	47
CC	GO:0005840	ribosome	23/441	79/5894	6.84483e-09	1.85666e-07	1.19784e-07	MT3/RPS15/APOD/RPL18/RPL8/RPS25/RPS27A/RPL28/RPL10/RPL23A/RPL37/SF1/RPLP2/PPARGC1A/RPS24/RPS6/RPL19/RPS12/RPLP1/RPL12/RPL37A/RPS9/RPL31	23
BP	GO:0030162	regulation of proteolysis	55/442	315/5658	5.37316e-09	1.86683e-07	1.11282e-07	HSPA1A/APOE/MT3/HSPA1B/CLU/PEBP1/CCK/DLC1/ENO1/AGT/GABARAPL2/ANTXR1/MAP3K5/FYN/F3/SERPINE2/FN1/PML/ITCH/FAS/GSN/PRNP/BST2/IL33/UBB/SMARCC1/STAT3/OPHN1/CSNK1A1/MBP/EGLN3/SORL1/WFDC1/CRADD/RGN/AQP1/HIP1R/SH3RF1/CAMK2N1/HIPK2/HIP1/GNA12/C5/ST18/YWHAE/ASPH/SPON1/IFI6/CTSH/BIRC2/HGF/CAST/FBLN1/COL4A3/CFLAR	55
BP	GO:0030335	positive regulation of cell migration	50/442	273/5658	5.50944e-09	1.89795e-07	1.13138e-07	HSPB1/TMSB4X/PRKCA/NR4A3/APC/PDGFRB/MAP4K4/DOCK4/SEMA5A/PTN/AGT/DOCK1/LRP1/SMURF2/CXCL14/F3/FGF2/PREX1/CDH13/NRP1/FN1/SOX9/PIK3C2A/JUN/GAB1/SEMA3E/LGALS3/TGFB2/STAT3/FGF1/ANGPT1/SPAG9/ADAM10/DDR2/ITGA6/HIF1A/ITGAV/SASH1/NEDD9/ATM/HSPA5/IL6R/S1PR1/TIAM1/IQGAP1/FGFR1/CTSH/PDGFC/HGF/DOCK5	50
BP	GO:0040017	positive regulation of locomotion	52/442	290/5658	5.69826e-09	1.94651e-07	1.16032e-07	HSPB1/TMSB4X/PRKCA/NR4A3/APC/PDGFRB/MAP4K4/DOCK4/SEMA5A/PTN/AGT/DOCK1/LRP1/SMURF2/CXCL14/F3/FGF2/PREX1/TUBB2B/CDH13/NRP1/FN1/SOX9/PIK3C2A/JUN/GAB1/SEMA3E/DSCAM/LGALS3/TGFB2/STAT3/FGF1/ANGPT1/SPAG9/ADAM10/DDR2/ITGA6/HIF1A/ITGAV/SASH1/NEDD9/ATM/HSPA5/IL6R/S1PR1/TIAM1/IQGAP1/FGFR1/CTSH/PDGFC/HGF/DOCK5	52
BP	GO:0010975	regulation of neuron projection development	41/442	201/5658	5.84565e-09	1.98021e-07	1.18041e-07	APOE/MT3/PTPRD/MAP4K4/SEMA5A/PTN/CFL1/CD38/NLGN1/AGT/IL1RAPL1/LRP1/PMP22/CUX1/FYN/TNIK/PREX1/TUBB2B/DAB1/NRP1/FN1/B2M/PRRX1/SEMA3E/DNM2/DSCAM/KANK1/PTPRG/SYT1/ADAM10/ITGA6/ID1/MEF2C/HSPA5/DNM3/TIAM1/IQGAP1/FGFR1/TRAK1/HGF/CFLAR	41
BP	GO:0048813	dendrite morphogenesis	19/442	53/5658	6.16497e-09	2.07112e-07	1.2346e-07	PTPRD/PREX2/PTN/CFL1/NLGN1/IL1RAPL1/MINK1/CUX1/FYN/TNIK/NRP1/DSCAM/ADAM10/ABI1/EPHB1/ID1/DNM3/TIAM1/TRAK1	19
BP	GO:0007411	axon guidance	30/442	121/5658	6.57501e-09	2.17296e-07	1.29531e-07	PRKCA/NR4A3/NRXN3/SEMA5A/BMPR1B/LRP1/GAB2/EPHA6/FYN/GLI2/TUBB2B/DAB1/NRP1/GAB1/SEMA3E/GFRA1/LAMA1/DSCAM/NEO1/OPHN1/RPS6KA5/EPHB1/LHX2/LGI1/NRXN1/PTPRM/NFIB/DOK5/FRS2/PTCH1	30
BP	GO:0097485	neuron projection guidance	30/442	121/5658	6.57501e-09	2.17296e-07	1.29531e-07	PRKCA/NR4A3/NRXN3/SEMA5A/BMPR1B/LRP1/GAB2/EPHA6/FYN/GLI2/TUBB2B/DAB1/NRP1/GAB1/SEMA3E/GFRA1/LAMA1/DSCAM/NEO1/OPHN1/RPS6KA5/EPHB1/LHX2/LGI1/NRXN1/PTPRM/NFIB/DOK5/FRS2/PTCH1	30
MF	GO:0008134	transcription factor binding	51/438	282/5628	5.21982e-09	2.18831e-07	1.55115e-07	ID2/FOS/NR4A3/TCF7L2/NR4A2/TOB2/MEIS2/HES5/PRDM16/NR4A1/JUND/GLI2/ZMIZ1/NCOR2/WBP2/SOX9/JUN/DDX5/ZEB1/FUS/STAT3/ACTB/NCOA6/TACC1/JARID2/FOXO1/RBPJ/PPARGC1A/LHX2/ID1/YAP1/MEF2C/TADA3/HIF1A/HIPK2/ID4/STAT1/TBL1X/NR1D1/HNRNPD/HMGN3/RERG/KAT2B/PRMT2/SRI/AR/NCOA2/BAZ2A/NR1H2/PRPF6/ARID1A	51
BP	GO:0048008	platelet-derived growth factor receptor signaling pathway	14/442	29/5658	6.71996e-09	2.20296e-07	1.31319e-07	APOD/NR4A3/PDGFRB/MYO1E/LRP1/F3/NRP1/PIK3C2A/PTPRJ/HIP1R/HIP1/TXNIP/IQGAP1/PDGFC	14
BP	GO:0016358	dendrite development	25/442	89/5658	8.13052e-09	2.64405e-07	1.57612e-07	APOE/PTPRD/PREX2/PTN/CFL1/NLGN1/IL1RAPL1/MINK1/CUX1/FYN/TNIK/PREX1/PRKG1/DAB1/NRP1/DSCAM/ADAM10/ABI1/EPHB1/ID1/MEF2C/DNM3/TIAM1/IQGAP1/TRAK1	25
BP	GO:0051961	negative regulation of nervous system development	34/442	151/5658	9.17975e-09	2.96156e-07	1.7654e-07	APOE/MT3/ID2/MAP4K4/SEMA5A/PTN/CD38/NLGN1/HES5/LRP1/BMPR1A/PMP22/CTNNA1/DAB1/NRP1/SOX9/B2M/SEMA3E/KANK1/DTX1/STAT3/PTPRG/SORL1/GPR37L1/LHX2/ID1/NRG1/ID4/DICER1/NR1D1/APPL2/DNM3/TULP3/NRG3	34
BP	GO:0006979	response to oxidative stress	38/442	181/5658	9.47586e-09	3.03302e-07	1.80799e-07	HSPA1A/APOE/HSPB1/MT3/HSPA1B/FOS/APOD/NR4A3/PDGFRB/CD38/NR4A2/SLC7A11/RBPMS/MAP3K5/FYN/DUSP1/PML/JUN/PSAP/DNM2/PRNP/HNRNPM/GPR37L1/RGN/FUT8/AQP1/FOXO1/PPARGC1A/HIF1A/STAT1/HNRNPD/GNAO1/TXNIP/PKD2/CAPN2/HGF/CFLAR/PRDX1	38
BP	GO:0050768	negative regulation of neurogenesis	33/442	144/5658	9.59523e-09	3.04531e-07	1.81532e-07	APOE/MT3/ID2/MAP4K4/SEMA5A/PTN/CD38/NLGN1/HES5/LRP1/BMPR1A/PMP22/CTNNA1/DAB1/NRP1/SOX9/B2M/SEMA3E/KANK1/DTX1/STAT3/PTPRG/SORL1/GPR37L1/LHX2/ID1/NRG1/ID4/DICER1/NR1D1/APPL2/DNM3/NRG3	33
BP	GO:0090092	regulation of transmembrane receptor protein serine/threonine kinase signaling pathway	29/442	116/5658	9.66408e-09	3.04531e-07	1.81532e-07	HSPA1A/LDLRAD4/HES5/SMURF2/BMPR1A/RBPMS/PRDM16/SULF1/LTBP1/TOB1/ZNF423/ZEB1/DNM2/TGFB2/UBB/RPS27A/NEO1/SORL1/RBPJ/HIPK2/UBC/WWTR1/HSPA5/CHST11/HTRA1/TGFB3/CHRDL1/FBN2/TGFBR3	29
BP	GO:0090288	negative regulation of cellular response to growth factor stimulus	24/442	84/5658	1.12622e-08	3.52161e-07	2.09924e-07	HSPA1A/LDLRAD4/AGT/SMURF2/PRDM16/SULF1/LTBP1/TOB1/CASK/DNM2/UBB/RPS27A/SORL1/HIPK2/UBC/HSPA5/CHST11/HTRA1/TGFB3/CHRDL1/FBN2/TGFBR3/EPN2/CFLAR	24
BP	GO:0031098	stress-activated protein kinase signaling cascade	32/442	138/5658	1.19497e-08	3.70805e-07	2.21038e-07	MAP4K4/STK3/AGT/ZFP36L1/GADD45B/ZFP36/MINK1/TAOK3/MAP3K5/TNIK/DUSP1/ITCH/FAS/TGFB2/UBB/RPS27A/SPAG9/MAP3K14/FOXO1/EPHB1/SH3RF1/SASH1/HIPK2/UBC/ADORA2B/DLG1/TPD52L1/TIAM1/STK10/TAB2/HGF/PRDX1	32
BP	GO:0071902	positive regulation of protein serine/threonine kinase activity	35/442	160/5658	1.22744e-08	3.77879e-07	2.25255e-07	PDGFRB/STK3/GADD45B/AKAP13/TAOK3/MAP3K5/TNIK/FGF2/CCND3/SLC27A1/UBB/RPS27A/CCNY/FGF1/SPAG9/MAP3K14/PLCE1/NRG1/SASH1/UBC/ATP2B4/ADORA2B/C5/TPD52L1/TIAM1/TGFB3/IQGAP1/FGFR1/FRS2/PKD2/TAB2/PDGFC/HGF/ADORA1/GHR	35
BP	GO:0034655	nucleobase-containing compound catabolic process	45/442	238/5658	1.23636e-08	3.77879e-07	2.25255e-07	HSPA1A/HSPB1/HSPA1B/PRKCA/RPS15/ENO1/ZFP36L1/ZFP36/RPL18/RPL8/TOB1/RPS25/TPR/DDX5/PDE1A/HNRNPM/UBB/RPS27A/RPL28/STAT3/RPL10/RPL23A/RPL37/ENTPD1/RGN/RPLP2/PPARGC1A/RPS24/HIF1A/UBC/RPS6/ATM/DDIT4/DCP1B/DICER1/RPL19/HNRNPD/RPS12/NUP160/RPLP1/RPL12/RPL37A/RPS9/HSPA8/RPL31	45
CC	GO:0009986	cell surface	64/441	421/5894	1.48721e-08	3.79677e-07	2.44953e-07	HSP90AA1/GPC6/FGFR2/CLU/TFRC/PDGFRB/PTN/CD38/NLGN1/ENO1/IL1RAPL1/SLC7A11/BMPR1A/MPZL1/ANTXR1/TF/CNTFR/MAP3K5/F3/SLC3A2/SULF1/NLGN4X/CDH13/GPC5/NRP1/SERPINE2/B2M/CD63/CD9/PTPRJ/FAS/WIF1/GFRA1/MSN/PRNP/BST2/LGALS3/FGFR3/RAMP1/INTU/MBP/MYO18A/ADAM10/PTPRT/IL6ST/ITGA6/ITGB8/NRXN1/ABCA1/GPRC5B/ITGAV/SLC1A3/SDC4/MFGE8/HSPA5/ADAMTS9/IL6R/S1PR1/TGFB3/CAPN2/PDGFC/TGFBR3/GHR/HLA-E	64
CC	GO:0044297	cell body	40/441	208/5894	1.57884e-08	3.80677e-07	2.45598e-07	APOE/HSP90AA1/APOD/GLUL/CCK/DNAJB1/BMPR1B/LRP1/BMPR1A/CPE/FYN/DAB1/NRP1/PDE1A/FUS/DSCAM/TGFB2/MYO10/UBB/RLBP1/RPL28/SST/PTBP2/MBP/ADCY8/S100B/PARD3/ADAM10/HIP1R/IL6ST/PPARGC1A/NRXN1/CAMK2N1/SLC1A3/RPS6/GNAO1/TIAM1/TGFB3/CAPN2/ADORA1	40
BP	GO:0000956	nuclear-transcribed mRNA catabolic process	25/442	91/5658	1.33866e-08	4.06094e-07	2.42074e-07	RPS15/ZFP36L1/ZFP36/RPL18/RPL8/TOB1/RPS25/DDX5/RPS27A/RPL28/RPL10/RPL23A/RPL37/RPLP2/RPS24/RPS6/ATM/DCP1B/RPL19/RPS12/RPLP1/RPL12/RPL37A/RPS9/RPL31	25
BP	GO:0016049	cell growth	39/442	191/5658	1.36506e-08	4.11033e-07	2.45018e-07	HSPA1A/APOE/HSP90AA1/MT3/HSPA1B/GJA1/SEMA5A/CD38/ENO1/AGT/AKAP13/LRP1/NRP1/SERPINE2/FN1/SOX9/PML/ITCH/PTPRJ/SEMA3E/DNM2/DSCAM/BST2/TGFB2/SYT1/WFDC1/PLCE1/OSGIN2/ADAM10/LHX2/LGI1/CDC73/RERG/EAF2/BCL6/TIAM1/IQGAP1/PRMT2/NRG3	39
MF	GO:0050839	cell adhesion molecule binding	45/438	238/5628	1.09277e-08	4.25398e-07	3.01537e-07	HSPA1A/PRKCA/PTPRD/PTPRZ1/NRXN3/DNAJB1/PTN/NLGN1/ENO1/CPE/FGF2/SLC3A2/NLGN4X/CTNNA1/CDH13/FN1/CD9/PTPRJ/MSN/NDRG1/FGF1/WASF2/RPL23A/ADAM10/PTPRT/ABI1/ITGA6/ITGB8/NRXN1/NRG1/ITGAV/PTPRM/MFGE8/STAT1/DLG1/HSPA5/FRMD5/YWHAE/UTRN/IQGAP1/CAST/HSPA8/COL4A3/EPN2/PRDX1	45
BP	GO:1901361	organic cyclic compound catabolic process	48/442	264/5658	1.46373e-08	4.37506e-07	2.60798e-07	HSPA1A/APOE/HSPB1/MT3/HSPA1B/PRKCA/RPS15/ENO1/ZFP36L1/ZFP36/RPL18/RPL8/TOB1/RPS25/TPR/DDX5/PDE1A/HNRNPM/UBB/TET1/RPS27A/RPL28/STAT3/RPL10/RPL23A/RPL37/ENTPD1/RGN/RPLP2/PPARGC1A/RPS24/HIF1A/UBC/RPS6/ATM/DDIT4/DCP1B/DICER1/RPL19/HNRNPD/RPS12/NUP160/RPLP1/RPL12/RPL37A/RPS9/HSPA8/RPL31	48
BP	GO:0044270	cellular nitrogen compound catabolic process	46/442	248/5658	1.57528e-08	4.67411e-07	2.78625e-07	HSPA1A/HSPB1/HSPA1B/PRKCA/RPS15/ENO1/ZFP36L1/ZFP36/RPL18/RPL8/TOB1/RPS25/TPR/DDX5/PDE1A/HNRNPM/UBB/TET1/RPS27A/RPL28/STAT3/RPL10/RPL23A/RPL37/ENTPD1/RGN/RPLP2/PPARGC1A/RPS24/HIF1A/UBC/RPS6/ATM/DDIT4/DCP1B/DICER1/RPL19/HNRNPD/RPS12/NUP160/RPLP1/RPL12/RPL37A/RPS9/HSPA8/RPL31	46
BP	GO:2000147	positive regulation of cell motility	50/442	282/5658	1.69771e-08	5.00087e-07	2.98103e-07	HSPB1/TMSB4X/PRKCA/NR4A3/APC/PDGFRB/MAP4K4/DOCK4/SEMA5A/PTN/AGT/DOCK1/LRP1/SMURF2/CXCL14/F3/FGF2/PREX1/CDH13/NRP1/FN1/SOX9/PIK3C2A/JUN/GAB1/SEMA3E/LGALS3/TGFB2/STAT3/FGF1/ANGPT1/SPAG9/ADAM10/DDR2/ITGA6/HIF1A/ITGAV/SASH1/NEDD9/ATM/HSPA5/IL6R/S1PR1/TIAM1/IQGAP1/FGFR1/CTSH/PDGFC/HGF/DOCK5	50
BP	GO:0071900	regulation of protein serine/threonine kinase activity	44/442	233/5658	1.89059e-08	5.52895e-07	3.29582e-07	APOE/HSPB1/APC/PDGFRB/STK3/GADD45B/AKAP13/TAOK3/MAP3K5/TNIK/FGF2/CCND3/DUSP1/SLC27A1/PTPRJ/UBB/RPS27A/CCNY/FGF1/ACTB/SORL1/SPAG9/MAP3K14/PLCE1/NRG1/KSR1/SASH1/UBC/ATP2B4/ADORA2B/C5/TPD52L1/TIAM1/KAT2B/TGFB3/IQGAP1/FGFR1/FRS2/PKD2/TAB2/PDGFC/HGF/ADORA1/GHR	44
BP	GO:0044265	cellular macromolecule catabolic process	63/442	398/5658	2.03838e-08	5.91858e-07	3.52808e-07	HSPA1A/APOE/HSPB1/HSP90AA1/HSPA1B/PRKCA/RPS15/CLU/ZFP36L1/GABARAPL2/LRP1/SMURF2/ZFP36/RPL18/RPL8/TOB1/RPS25/PML/ITCH/DDX5/MSN/HNRNPM/IL33/UBB/SMARCC1/RPS27A/RPL28/RPL10/RNF213/OPHN1/CSNK1A1/RPL23A/RPL37/RGN/RPLP2/RPS24/HIPK2/ZNRF3/UBC/WWTR1/RPS6/ATM/TBL1X/DCP1B/HSPA5/DICER1/RPL19/NR1D1/HNRNPD/GNA12/RPS12/UBAP1/ADAMTS9/VPS28/RPLP1/RPL12/CTSH/RPL37A/RPS9/BIRC2/CAPN2/HSPA8/RPL31	63
BP	GO:0051403	stress-activated MAPK cascade	30/442	127/5658	2.20669e-08	6.36184e-07	3.79231e-07	MAP4K4/STK3/AGT/ZFP36L1/GADD45B/ZFP36/MINK1/TAOK3/MAP3K5/TNIK/DUSP1/ITCH/FAS/TGFB2/UBB/RPS27A/SPAG9/FOXO1/EPHB1/SH3RF1/SASH1/HIPK2/UBC/ADORA2B/DLG1/TPD52L1/TIAM1/TAB2/HGF/PRDX1	30
BP	GO:0046700	heterocycle catabolic process	46/442	251/5658	2.32576e-08	6.61758e-07	3.94476e-07	HSPA1A/HSPB1/HSPA1B/PRKCA/RPS15/ENO1/ZFP36L1/ZFP36/RPL18/RPL8/TOB1/RPS25/TPR/DDX5/PDE1A/HNRNPM/UBB/TET1/RPS27A/RPL28/STAT3/RPL10/RPL23A/RPL37/ENTPD1/RGN/RPLP2/PPARGC1A/RPS24/HIF1A/UBC/RPS6/ATM/DDIT4/DCP1B/DICER1/RPL19/HNRNPD/RPS12/NUP160/RPLP1/RPL12/RPL37A/RPS9/HSPA8/RPL31	46
BP	GO:2001233	regulation of apoptotic signaling pathway	37/442	179/5658	2.32795e-08	6.61758e-07	3.94476e-07	HSPA1A/HSPB1/HSPA1B/CLU/TCF7L2/NR4A2/STK3/ENO1/AGT/BMPR1B/TMBIM1/FYN/PHIP/CTNNA1/NRP1/PML/FAS/GSN/LGALS3/UBB/CRADD/PPP2R1B/HIP1R/ITGA6/SH3RF1/YAP1/HIF1A/ITGAV/TPD52L1/ST18/YWHAE/FGFR1/IFI6/CTSH/HGF/AR/CFLAR	37
CC	GO:0033267	axon part	30/441	134/5894	3.1095e-08	7.10274e-07	4.58241e-07	HSPB1/HSP90AA1/GLUL/CCK/LRP1/ACTG1/PREX1/NRP1/DNM2/DSCAM/PTBP2/OPHN1/MBP/ACTB/NDRG2/PARD3/ABI1/HIF1A/DLG1/DICER1/YWHAE/TIAM1/UTRN/IQGAP1/SRI/AP3B1/TRAK1/ADORA1/PTCH1/HSPA8	30
BP	GO:0000184	nuclear-transcribed mRNA catabolic process, nonsense-mediated decay	20/442	63/5658	2.69112e-08	7.5968e-07	4.52847e-07	RPS15/RPL18/RPL8/RPS25/RPS27A/RPL28/RPL10/RPL23A/RPL37/RPLP2/RPS24/RPS6/DCP1B/RPL19/RPS12/RPLP1/RPL12/RPL37A/RPS9/RPL31	20
MF	GO:0019904	protein domain specific binding	53/438	311/5628	2.17447e-08	7.90057e-07	5.60021e-07	HSPA1A/HSP90AA1/HSPA1B/GJA1/CADM1/ETV6/DOCK4/PLSCR1/DLC1/TCF7L2/NLGN1/DOCK1/MAP3K5/FYN/TNK2/FN1/TUBA1A/PRRX1/JUN/DDX5/DNM2/HNRNPM/DTX1/WASF2/CRADD/FUT8/ARHGAP31/ADAM10/ABI1/HIP1R/ARHGAP29/MEF2C/TADA3/HIF1A/ATP2B4/DLG1/TBL1X/HSPA5/DICER1/STAMBP/SH3PXD2B/ARHGAP17/POLR2J/YWHAE/IQGAP1/SPON1/FGFR1/PKD2/TRAK1/AR/NCOA2/TGFBR3/HSPA8	53
BP	GO:0001822	kidney development	32/442	143/5658	2.99102e-08	8.35835e-07	4.98244e-07	ID2/FGFR2/PDGFRB/MYO1E/AGT/HES5/FGF2/GLI2/SULF1/NRP1/SOX9/TGFB2/FGF1/EGR1/ANGPT1/RGN/PLCE1/YAP1/MEF2C/WWTR1/SDC4/STAT1/DLG1/IL6R/NUP160/IQGAP1/FGFR1/PKD2/CTSH/PTCH1/COL4A3/CFLAR	32
BP	GO:0048598	embryonic morphogenesis	46/442	253/5658	3.00202e-08	8.35835e-07	4.98244e-07	ID2/FGFR2/GJA1/NR4A3/DLC1/CFL1/STK3/ZFP36L1/HES5/BMPR1A/FGF2/GLI2/SULF1/PHACTR4/FN1/SOX9/PRRX1/ZEB1/EFEMP1/TGFB2/INTU/MBP/TSC2/SOCS3/LHX2/CDC73/WLS/YAP1/MEF2C/HIF1A/ITGAV/HIPK2/RPS6/SDC4/DLG1/CHST11/GNA12/TGFB3/FGFR1/TULP3/FRS2/PKD2/FBN2/AR/PTCH1/ARID1A	46
CC	GO:0098794	postsynapse	40/441	215/5894	4.16682e-08	9.042e-07	5.83355e-07	MT3/GABRB1/DNAJB1/PTN/NLGN1/IL1RAPL1/MINK1/RPL8/FYN/TNIK/GABRG1/NLGN4X/RPS25/DAB1/NRP1/DNM2/FUS/PRNP/STAT3/OPHN1/ACTB/TSC2/ADCY8/ADAM10/ABI1/HIP1R/MEF2C/CAMK2N1/DLG1/NR1D1/HIP1/IGSF11/DNM3/TIAM1/RPL12/UTRN/SRI/ADORA1/PTCH1/HSPA8	40
CC	GO:0150034	distal axon	25/441	100/5894	4.50749e-08	9.31547e-07	6.00998e-07	HSP90AA1/GLUL/CCK/LRP1/ACTG1/PREX1/NRP1/DNM2/DSCAM/PTBP2/OPHN1/ACTB/NDRG2/PARD3/ABI1/DICER1/YWHAE/TIAM1/UTRN/IQGAP1/SRI/TRAK1/ADORA1/PTCH1/HSPA8	25
BP	GO:0044087	regulation of cellular component biogenesis	59/442	367/5658	3.43201e-08	9.49057e-07	5.65735e-07	HSPA1A/APOE/HSP90AA1/HSPA1B/GJA1/TMSB4X/STMN1/PRKCA/APOD/CLU/PTPRD/APC/LDLRAD4/CCK/MAP4K4/DNAJB1/DLC1/ARHGEF10/NLGN1/AGT/IL1RAPL1/LIMS1/AKAP13/LRP1/ANTXR1/PREX1/NRP1/SOX9/JUN/TPR/PTPRJ/DNM2/GSN/MSN/MYO10/KANK1/WASF2/RAP1B/SORL1/HIP1R/EPHB1/NRXN1/ABCA1/ID1/ELN/MEF2C/SDC4/ATM/DLG1/SH3PXD2B/S1PR1/DNM3/RICTOR/KAT2B/TGFB3/IQGAP1/ARHGEF10L/BIRC2/HSPA8	59
BP	GO:0006401	RNA catabolic process	34/442	159/5658	3.6606e-08	1.00064e-06	5.96484e-07	HSPA1A/HSPB1/HSPA1B/PRKCA/RPS15/ZFP36L1/ZFP36/RPL18/RPL8/TOB1/RPS25/DDX5/HNRNPM/UBB/RPS27A/RPL28/RPL10/RPL23A/RPL37/RPLP2/RPS24/UBC/RPS6/ATM/DCP1B/RPL19/HNRNPD/RPS12/RPLP1/RPL12/RPL37A/RPS9/HSPA8/RPL31	34
BP	GO:0014855	striated muscle cell proliferation	16/442	42/5658	3.66778e-08	1.00064e-06	5.96484e-07	FGFR2/GJA1/BMPR1A/FGF2/TGFB2/STAT3/ANGPT1/JARID2/RBPJ/EPHB1/YAP1/MEF2C/MEGF10/FGFR1/TGFBR3/CFLAR	16
BP	GO:0030900	forebrain development	37/442	182/5658	3.70459e-08	1.00394e-06	5.98454e-07	ID2/FGFR2/NR4A3/DNAJB1/SEMA5A/DLC1/PTN/NR4A2/SLC7A11/HES5/LRP1/BMPR1A/FYN/GLI2/PRKG1/DAB1/NRP1/B2M/UBB/OPHN1/BCAN/TACC1/AQP1/RBPJ/PPARGC1A/LHX2/NRG1/HIF1A/ID4/ATP2B4/NFIB/GNAO1/YWHAE/FGFR1/FRS2/NRG3/ARID1A	37
BP	GO:0019439	aromatic compound catabolic process	46/442	255/5658	3.86126e-08	1.03947e-06	6.19632e-07	HSPA1A/HSPB1/HSPA1B/PRKCA/RPS15/ENO1/ZFP36L1/ZFP36/RPL18/RPL8/TOB1/RPS25/TPR/DDX5/PDE1A/HNRNPM/UBB/TET1/RPS27A/RPL28/STAT3/RPL10/RPL23A/RPL37/ENTPD1/RGN/RPLP2/PPARGC1A/RPS24/HIF1A/UBC/RPS6/ATM/DDIT4/DCP1B/DICER1/RPL19/HNRNPD/RPS12/NUP160/RPLP1/RPL12/RPL37A/RPS9/HSPA8/RPL31	46
CC	GO:0048471	perinuclear region of cytoplasm	48/441	286/5894	5.30415e-08	1.04636e-06	6.75074e-07	HSPA1A/HSP90AA1/MT3/HSPA1B/PRKCA/MMD2/APOD/CLU/TFRC/APC/PLSCR1/PTN/LIMS1/AKAP13/MEIS2/TF/CHI3L1/FYN/PREX1/CDH13/TNK2/DAB1/DNM2/FUS/GSN/MSN/NDRG1/TSC2/SPAG9/NDRG2/S100B/ADAM10/HIP1R/ABCA1/SH3RF1/PTPRM/S100A6/RPS6/STAT1/DLG1/MAP7/TPD52L1/DNM3/MYO9B/TRAK1/CAPN2/PTCH1/MYO16	48
BP	GO:0097191	extrinsic apoptotic signaling pathway	29/442	123/5658	3.99488e-08	1.06837e-06	6.36857e-07	HSPA1A/HSPA1B/TCF7L2/STK3/AGT/BMPR1B/TMBIM1/FYN/PHIP/CTNNA1/NRP1/PML/FAS/LGALS3/FGFR3/TGFB2/IL33/CRADD/PPP2R1B/ITGA6/SH3RF1/YAP1/ITGAV/IL6R/FGFR1/IFI6/HGF/AR/CFLAR	29
BP	GO:1901342	regulation of vasculature development	37/442	183/5658	4.31291e-08	1.14588e-06	6.83063e-07	HSPB1/PRKCA/GLUL/SEMA5A/PTN/AGT/CHI3L1/F3/FGF2/SULF1/NRP1/PIK3C2A/S100A1/PML/GAB1/SEMA3E/TGFB2/STAT3/FGF1/EGR1/AQP1/ADAM10/ITGB8/ID1/HIF1A/SASH1/HIPK2/PTPRM/STAT1/ADAMTS9/IL6R/JAK1/CTSH/HGF/COL4A3/EPN2/CFLAR	37
BP	GO:0072001	renal system development	33/442	153/5658	4.69932e-08	1.24044e-06	7.39428e-07	ID2/FGFR2/PDGFRB/MYO1E/AGT/HES5/FGF2/GLI2/SULF1/NRP1/SOX9/TGFB2/FGF1/EGR1/ANGPT1/RGN/PLCE1/ITGA6/YAP1/MEF2C/WWTR1/SDC4/STAT1/DLG1/IL6R/NUP160/IQGAP1/FGFR1/PKD2/CTSH/PTCH1/COL4A3/CFLAR	33
BP	GO:0045047	protein targeting to ER	20/442	65/5658	4.87785e-08	1.26533e-06	7.54266e-07	RPS15/RPL18/RPL8/RPS25/RPS27A/RPL28/RPL10/RPL23A/RPL37/RPLP2/RPS24/RPS6/HSPA5/RPL19/RPS12/RPLP1/RPL12/RPL37A/RPS9/RPL31	20
BP	GO:0010632	regulation of epithelial cell migration	28/442	117/5658	4.887e-08	1.26533e-06	7.54266e-07	APOE/HSPB1/TMSB4X/PRKCA/GLUL/MAP4K4/SEMA5A/PTN/AGT/DOCK1/FGF2/NRP1/SOX9/PIK3C2A/JUN/MCC/TGFB2/FGF1/PTPRG/ANGPT1/MEF2C/HIF1A/SASH1/PTPRM/ADAMTS9/FGFR1/CTSH/DOCK5	28
BP	GO:0043491	protein kinase B signaling	28/442	117/5658	4.887e-08	1.26533e-06	7.54266e-07	HSP90AA1/MT3/FGFR2/PDGFRB/SEMA5A/TCF7L2/STK3/ZFP36L1/CHI3L1/CCL2/FYN/F3/FGF2/SOX9/GAB1/PTPRJ/FGFR3/FGF1/ANGPT1/TSC2/NRG1/MERTK/DLG1/HIP1/RICTOR/FGFR1/FRS2/HGF	28
BP	GO:0002009	morphogenesis of an epithelium	46/442	257/5658	4.94925e-08	1.26577e-06	7.54529e-07	GPC6/FGFR2/GJA1/DLC1/CFL1/STK3/AGT/TNC/HES5/SMURF2/FGF2/GLI2/SULF1/PHACTR4/NRP1/SOX9/PML/SEMA3E/MSN/LAMA1/TGFB2/FGF1/INTU/OPHN1/TSC2/SOCS3/RBPJ/LHX2/YAP1/MEF2C/HIF1A/ZNRF3/ID4/SDC4/STAT1/DLG1/TIAM1/FGFR1/TULP3/FRS2/PKD2/CTSH/HGF/AR/PTCH1/ARID1A	46
BP	GO:2001236	regulation of extrinsic apoptotic signaling pathway	24/442	90/5658	4.95098e-08	1.26577e-06	7.54529e-07	HSPA1A/HSPA1B/TCF7L2/STK3/AGT/BMPR1B/TMBIM1/FYN/PHIP/CTNNA1/NRP1/PML/FAS/LGALS3/PPP2R1B/ITGA6/SH3RF1/YAP1/ITGAV/FGFR1/IFI6/HGF/AR/CFLAR	24
CC	GO:0014069	postsynaptic density	26/441	109/5894	6.80171e-08	1.28345e-06	8.28034e-07	MT3/DNAJB1/NLGN1/MINK1/RPL8/FYN/TNIK/NLGN4X/RPS25/DAB1/DNM2/PRNP/STAT3/TSC2/ADCY8/ADAM10/ABI1/HIP1R/CAMK2N1/DLG1/IGSF11/DNM3/TIAM1/RPL12/ADORA1/PTCH1	26
BP	GO:0051248	negative regulation of protein metabolic process	68/442	454/5658	5.11922e-08	1.3006e-06	7.75292e-07	HSPA1A/APOE/HSPB1/MT3/HSPA1B/APOD/CLU/APC/PEBP1/LDLRAD4/PTN/AGT/ZFP36L1/GADD45B/GABARAPL2/ZFP36/TAOK3/FYN/DUSP1/TOB1/SERPINE2/PML/JUN/TPR/ITCH/PTPRJ/PRNP/BST2/LGALS3/SMARCC1/STAT3/OPHN1/ANGPT1/UBASH3B/SORL1/TSC2/NDRG2/WFDC1/PARD3/RGN/JARID2/SOCS3/AQP1/FOXO1/PTPRT/PPARGC1A/SH3RF1/NRG1/CAMK2N1/ITGAV/HIPK2/WWTR1/ATP2B4/DDIT4/DLG1/HNRNPD/C5/VPS28/YWHAE/KAT2B/SPON1/IFI6/BIRC2/HGF/CAST/FBLN1/COL4A3/CFL…	68
BP	GO:0019083	viral transcription	25/442	97/5658	5.43116e-08	1.37128e-06	8.17426e-07	RPS15/ZFP36/RPL18/RPL8/RPS25/JUN/TPR/RPS27A/RPL28/RPL10/RPL23A/RPL37/RPLP2/RPS24/RPS6/RPL19/POLR2L/RPS12/NUP160/POLR2J/RPLP1/RPL12/RPL37A/RPS9/RPL31	25
BP	GO:0072006	nephron development	23/442	84/5658	5.53203e-08	1.38813e-06	8.27468e-07	PDGFRB/MYO1E/AGT/HES5/FGF2/SULF1/SOX9/FGF1/EGR1/ANGPT1/PLCE1/YAP1/MEF2C/WWTR1/STAT1/DLG1/IL6R/NUP160/IQGAP1/PKD2/PTCH1/COL4A3/CFLAR	23
BP	GO:0098657	import into cell	60/442	381/5658	5.63411e-08	1.40507e-06	8.37567e-07	APOE/HSP90AA1/CLU/GLUL/TFRC/MYO1E/NLGN1/AGT/DOCK1/SLC7A11/LRP1/ACTG1/TF/CCL2/SLC9A9/RIN2/FYN/ZFYVE16/SLC3A2/NLGN4X/CDH13/VAV3/TNK2/B2M/PIK3C2A/CD63/CD9/PTPRJ/DNM2/GSN/PRNP/LGALS3/MYO10/RAMP1/SYT1/WASF2/OPHN1/ANGPT1/ACTB/SORL1/MYO18A/TSC2/ABI1/HIP1R/ABCA1/ITGAV/SLC1A3/MERTK/ATP2B4/MFGE8/VAV2/HIP1/APPL2/MEGF10/DNM3/VPS28/ADORA1/NR1H2/GHR/EPN2	60
BP	GO:0010769	regulation of cell morphogenesis involved in differentiation	29/442	125/5658	5.85546e-08	1.45137e-06	8.65165e-07	APOE/MT3/PTPRD/SEMA5A/CFL1/NLGN1/IL1RAPL1/DOCK1/LIMS1/LRP1/CUX1/TNIK/PREX1/TUBB2B/DAB1/NRP1/FN1/SEMA3E/DNM2/DSCAM/KANK1/ADAM10/ID1/NEDD9/DNM3/TIAM1/TRAK1/DOCK5/FBLN1	29
BP	GO:0033365	protein localization to organelle	52/442	310/5658	5.90182e-08	1.45399e-06	8.6673e-07	HSP90AA1/GPC6/RPS15/APOD/CLU/GLUL/APC/AGT/RPL18/CPE/RPL8/FYN/ZFYVE16/RPS25/NRP1/SOX9/PML/TPR/MSN/UBB/RPS27A/RPL28/STAT3/RPL10/ANGPT1/RPL23A/SORL1/TSC2/RPL37/ADAM10/RPLP2/LGI1/RPS24/UBC/RPS6/DLG1/HSPA5/RPL19/APPL2/RPS12/TXNIP/VPS28/RPLP1/YWHAE/RPL12/TULP3/MORC3/RPL37A/AP3B1/RPS9/HSPA8/RPL31	52
BP	GO:0072599	establishment of protein localization to endoplasmic reticulum	20/442	66/5658	6.50058e-08	1.59186e-06	9.48912e-07	RPS15/RPL18/RPL8/RPS25/RPS27A/RPL28/RPL10/RPL23A/RPL37/RPLP2/RPS24/RPS6/HSPA5/RPL19/RPS12/RPLP1/RPL12/RPL37A/RPS9/RPL31	20
BP	GO:0048732	gland development	40/442	210/5658	6.82698e-08	1.66178e-06	9.9059e-07	ID2/FGFR2/GJA1/PTN/TNC/BMPR1A/GLI2/SULF1/NRP1/NCOR2/SERPINE2/SOX9/PML/JUN/PSAP/MSN/LAMA1/TGFB2/SMARCC1/RGN/JARID2/RBPJ/NRG1/WLS/HIF1A/ID4/ATM/HNRNPD/NFIB/EAF2/TGFB3/FGFR1/FRS2/PKD2/HGF/NRG3/AR/TGFBR3/PTCH1/CFLAR	40
BP	GO:0010631	epithelial cell migration	32/442	148/5658	7.12053e-08	1.71272e-06	1.02096e-06	APOE/HSPB1/TMSB4X/PRKCA/GLUL/MAP4K4/SEMA5A/PTN/AGT/DOCK1/NR4A1/FGF2/CDH13/NRP1/SOX9/PIK3C2A/JUN/MCC/TGFB2/KANK1/FGF1/PTPRG/ANGPT1/ID1/MEF2C/HIF1A/SASH1/PTPRM/ADAMTS9/FGFR1/CTSH/DOCK5	32
BP	GO:0090132	epithelium migration	32/442	148/5658	7.12053e-08	1.71272e-06	1.02096e-06	APOE/HSPB1/TMSB4X/PRKCA/GLUL/MAP4K4/SEMA5A/PTN/AGT/DOCK1/NR4A1/FGF2/CDH13/NRP1/SOX9/PIK3C2A/JUN/MCC/TGFB2/KANK1/FGF1/PTPRG/ANGPT1/ID1/MEF2C/HIF1A/SASH1/PTPRM/ADAMTS9/FGFR1/CTSH/DOCK5	32
CC	GO:0098984	neuron to neuron synapse	27/441	118/5894	9.60618e-08	1.73712e-06	1.12072e-06	MT3/DNAJB1/NLGN1/MINK1/RPL8/FYN/TNIK/NLGN4X/RPS25/DAB1/DNM2/PRNP/STAT3/SYT1/TSC2/ADCY8/ADAM10/ABI1/HIP1R/CAMK2N1/DLG1/IGSF11/DNM3/TIAM1/RPL12/ADORA1/PTCH1	27
CC	GO:0032279	asymmetric synapse	26/441	111/5894	1.00967e-07	1.75279e-06	1.13084e-06	MT3/DNAJB1/NLGN1/MINK1/RPL8/FYN/TNIK/NLGN4X/RPS25/DAB1/DNM2/PRNP/STAT3/TSC2/ADCY8/ADAM10/ABI1/HIP1R/CAMK2N1/DLG1/IGSF11/DNM3/TIAM1/RPL12/ADORA1/PTCH1	26
BP	GO:0045666	positive regulation of neuron differentiation	31/442	141/5658	7.65217e-08	1.82977e-06	1.09073e-06	APOE/MMD2/PTPRD/SEMA5A/PTN/NLGN1/AGT/IL1RAPL1/LRP1/CUX1/FYN/GLI2/TUBB2B/DAB1/NRP1/FN1/ZEB1/DSCAM/SYT1/SPAG9/ITGA6/GPRC5B/MEF2C/HSPA5/BCL6/TIAM1/IQGAP1/FGFR1/TRAK1/HGF/CFLAR	31
BP	GO:1903845	negative regulation of cellular response to transforming growth factor beta stimulus	16/442	44/5658	7.92507e-08	1.88394e-06	1.12302e-06	HSPA1A/LDLRAD4/SMURF2/PRDM16/LTBP1/DNM2/UBB/RPS27A/UBC/HSPA5/CHST11/HTRA1/TGFB3/FBN2/TGFBR3/CFLAR	16
CC	GO:0043025	neuronal cell body	35/441	181/5894	1.13464e-07	1.89398e-06	1.22192e-06	APOE/HSP90AA1/APOD/GLUL/CCK/DNAJB1/BMPR1B/LRP1/BMPR1A/CPE/DAB1/NRP1/PDE1A/FUS/DSCAM/TGFB2/MYO10/UBB/SST/PTBP2/MBP/ADCY8/S100B/PARD3/ADAM10/HIP1R/IL6ST/PPARGC1A/NRXN1/CAMK2N1/SLC1A3/TIAM1/TGFB3/CAPN2/ADORA1	35
BP	GO:0010721	negative regulation of cell development	34/442	164/5658	8.21474e-08	1.93372e-06	1.1527e-06	APOE/MT3/ID2/MAP4K4/SEMA5A/PTN/CD38/NLGN1/HES5/LRP1/BMPR1A/PMP22/CTNNA1/DAB1/NRP1/SOX9/B2M/SEMA3E/KANK1/DTX1/STAT3/PTPRG/SORL1/GPR37L1/LHX2/ID1/NRG1/ID4/DICER1/NR1D1/APPL2/DNM3/NRG3/FBLN1	34
BP	GO:0010720	positive regulation of cell development	43/442	236/5658	8.22963e-08	1.93372e-06	1.1527e-06	APOE/ID2/MMD2/PTPRD/PTPRZ1/SEMA5A/PTN/NLGN1/AGT/IL1RAPL1/DOCK1/LIMS1/LRP1/CUX1/FYN/GLI2/PREX1/TUBB2B/DAB1/NRP1/SERPINE2/FN1/ZEB1/DNM2/DSCAM/SYT1/SPAG9/IL6ST/ITGA6/GPRC5B/MEF2C/HIF1A/NEDD9/HSPA5/DICER1/BCL6/TIAM1/IQGAP1/FGFR1/TRAK1/HGF/DOCK5/CFLAR	43
BP	GO:0000302	response to reactive oxygen species	26/442	106/5658	8.73952e-08	2.04173e-06	1.21708e-06	APOE/MT3/FOS/APOD/NR4A3/PDGFRB/MAP3K5/FYN/DUSP1/JUN/PSAP/DNM2/GPR37L1/RGN/AQP1/FOXO1/PPARGC1A/STAT1/HNRNPD/GNAO1/TXNIP/PKD2/CAPN2/HGF/CFLAR/PRDX1	26
BP	GO:0031589	cell-substrate adhesion	36/442	180/5658	8.87256e-08	2.06097e-06	1.22855e-06	APOD/MAP4K4/DLC1/PTN/DOCK1/LIMS1/LRP1/ANTXR1/MINK1/PREX1/CDH13/NRP1/FN1/CD63/CASK/PTPRJ/SEMA3E/DNM2/KANK1/ANGPT1/SORBS1/EPHB1/DDR2/ITGA6/ID1/ITGAV/NEDD9/MERTK/SDC4/ADAMTS9/BCL6/TIAM1/UTRN/IQGAP1/DOCK5/FBLN1	36
BP	GO:0022604	regulation of cell morphogenesis	40/442	212/5658	8.95867e-08	2.06915e-06	1.23342e-06	APOE/MT3/PTPRD/SEMA5A/DLC1/PTN/CFL1/NLGN1/IL1RAPL1/DOCK1/LIMS1/LRP1/CUX1/CCL2/FYN/TNIK/PREX1/PHIP/TUBB2B/DAB1/NRP1/FN1/SEMA3E/DNM2/MSN/DSCAM/MYO10/KANK1/SYT1/S100B/ADAM10/ID1/NEDD9/DLG1/GNA12/DNM3/TIAM1/TRAK1/DOCK5/FBLN1	40
CC	GO:0044391	ribosomal subunit	19/441	65/5894	1.34415e-07	2.1606e-06	1.39394e-06	RPS15/RPL18/RPL8/RPS25/RPS27A/RPL28/RPL10/RPL23A/RPL37/RPLP2/RPS24/RPS6/RPL19/RPS12/RPLP1/RPL12/RPL37A/RPS9/RPL31	19
BP	GO:0043405	regulation of MAP kinase activity	34/442	165/5658	9.60936e-08	2.2069e-06	1.31554e-06	APOE/PDGFRB/GADD45B/AKAP13/TAOK3/MAP3K5/TNIK/FGF2/DUSP1/PTPRJ/UBB/RPS27A/FGF1/SORL1/SPAG9/MAP3K14/PLCE1/NRG1/KSR1/SASH1/UBC/ADORA2B/C5/TPD52L1/TIAM1/TGFB3/IQGAP1/FGFR1/FRS2/TAB2/PDGFC/HGF/ADORA1/GHR	34
BP	GO:0007610	behavior	42/442	229/5658	9.69976e-08	2.21452e-06	1.32008e-06	APOE/ID2/GJA1/FOS/NR4A3/PTPRZ1/NRXN3/CCK/PREX2/PTN/NR4A2/NLGN1/AGT/SLC7A11/MEIS2/CNTFR/FYN/NLGN4X/DAB1/SERPINE2/B2M/JUN/PSAP/PRNP/DSCAM/STAT3/EGR1/FGF12/ADCY8/S100B/NRXN1/NRG1/MEF2C/HIF1A/SLC1A3/HIPK2/DACH1/NR1D1/GNAO1/CAPN2/NCOA2/ADORA1	42
BP	GO:0048661	positive regulation of smooth muscle cell proliferation	17/442	50/5658	9.7515e-08	2.21452e-06	1.32008e-06	ID2/FGFR2/NR4A3/PDGFRB/AGT/HES5/BMPR1A/MAP3K5/FGF2/CDH13/JUN/PPARGC1A/ABCC4/STAT1/NAMPT/IL6R/S1PR1	17
BP	GO:0006612	protein targeting to membrane	24/442	93/5658	9.82167e-08	2.21806e-06	1.32219e-06	RPS15/RPL18/RPL8/FYN/RPS25/PRNP/RPS27A/RPL28/RPL10/RPL23A/RPL37/PARD3/RPLP2/RPS24/RPS6/HSPA5/RPL19/RPS12/RPLP1/RPL12/RPL37A/RPS9/ADORA1/RPL31	24
BP	GO:0043434	response to peptide hormone	35/442	173/5658	1.00121e-07	2.24857e-06	1.34038e-06	GJA1/NR4A3/APC/NR4A2/AGT/ZFP36L1/NR4A1/JUND/FYN/CCND3/PHIP/PIK3C2A/SLC27A1/GAB1/SMARCC1/KANK1/STAT3/EGR1/SRSF6/RAP1B/SORL1/TSC2/ADCY8/SOCS3/FOXO1/SORBS1/ATP6V0E1/STAT1/APPL2/KAT2B/STAT2/IQGAP1/TGFBR3/GHR/CFLAR	35
BP	GO:0052547	regulation of peptidase activity	37/442	189/5658	1.04376e-07	2.33125e-06	1.38967e-06	MT3/PEBP1/CCK/DLC1/AGT/ANTXR1/MAP3K5/FYN/F3/SERPINE2/FN1/PML/FAS/GSN/BST2/STAT3/MBP/EGLN3/SORL1/WFDC1/CRADD/AQP1/HIP1R/SH3RF1/HIP1/C5/ST18/YWHAE/ASPH/IFI6/CTSH/BIRC2/HGF/CAST/FBLN1/COL4A3/CFLAR	37
BP	GO:0070482	response to oxygen levels	34/442	166/5658	1.12231e-07	2.49301e-06	1.48609e-06	MT3/PDGFRB/PTN/CD38/NR4A2/ENO1/ZFP36L1/ITPR2/PML/FAS/TGFB2/UBB/RPS27A/NDRG1/EGR1/EGLN3/S100B/AQP1/FOXO1/RBPJ/PPARGC1A/HIF1A/HIPK2/UBC/ATM/DDIT4/HP1BP3/NAMPT/TGFB3/BIRC2/CAPN2/ADORA1/TGFBR3/CFLAR	34
BP	GO:0016055	Wnt signaling pathway	40/442	214/5658	1.17045e-07	2.5858e-06	1.5414e-06	APOE/GPC6/FGFR2/APC/SEMA5A/TCF7L2/NR4A2/STK3/LRP1/SMURF2/CPE/TNIK/SULF1/GPC5/SOX9/MCC/WIF1/UBB/RPS27A/KANK1/CCNY/EGR1/RNF213/CSNK1A1/TSC2/NDRG2/FOXO1/RBPJ/CDC73/WLS/YAP1/GPRC5B/MERTK/ZNRF3/UBC/WWTR1/TBL1X/GNAO1/TIAM1/PKD2	40
BP	GO:0043406	positive regulation of MAP kinase activity	29/442	129/5658	1.22274e-07	2.68671e-06	1.60156e-06	PDGFRB/GADD45B/AKAP13/TAOK3/MAP3K5/TNIK/FGF2/UBB/RPS27A/FGF1/SPAG9/MAP3K14/PLCE1/NRG1/SASH1/UBC/ADORA2B/C5/TPD52L1/TIAM1/TGFB3/IQGAP1/FGFR1/FRS2/TAB2/PDGFC/HGF/ADORA1/GHR	29
BP	GO:0198738	cell-cell signaling by wnt	40/442	215/5658	1.33569e-07	2.91912e-06	1.7401e-06	APOE/GPC6/FGFR2/APC/SEMA5A/TCF7L2/NR4A2/STK3/LRP1/SMURF2/CPE/TNIK/SULF1/GPC5/SOX9/MCC/WIF1/UBB/RPS27A/KANK1/CCNY/EGR1/RNF213/CSNK1A1/TSC2/NDRG2/FOXO1/RBPJ/CDC73/WLS/YAP1/GPRC5B/MERTK/ZNRF3/UBC/WWTR1/TBL1X/GNAO1/TIAM1/PKD2	40
BP	GO:0090130	tissue migration	32/442	152/5658	1.37815e-07	2.99582e-06	1.78582e-06	APOE/HSPB1/TMSB4X/PRKCA/GLUL/MAP4K4/SEMA5A/PTN/AGT/DOCK1/NR4A1/FGF2/CDH13/NRP1/SOX9/PIK3C2A/JUN/MCC/TGFB2/KANK1/FGF1/PTPRG/ANGPT1/ID1/MEF2C/HIF1A/SASH1/PTPRM/ADAMTS9/FGFR1/CTSH/DOCK5	32
BP	GO:0010035	response to inorganic substance	42/442	232/5658	1.41958e-07	3.06945e-06	1.82971e-06	MT3/ID2/FOS/NR4A3/PDGFRB/NLGN1/TF/MAP3K5/JUND/FYN/DUSP1/B2M/JUN/PSAP/CD9/DNM2/FUS/GSN/PRNP/NDRG1/SYT1/ADCY8/GPR37L1/RGN/AQP1/FOXO1/PPARGC1A/MEF2C/HIF1A/ATP2B4/STAT1/HSPA5/HNRNPD/GNAO1/TXNIP/IQGAP1/PKD2/CAPN2/HGF/PTCH1/CFLAR/PRDX1	42
BP	GO:0006614	SRP-dependent cotranslational protein targeting to membrane	19/442	63/5658	1.51856e-07	3.26611e-06	1.94694e-06	RPS15/RPL18/RPL8/RPS25/RPS27A/RPL28/RPL10/RPL23A/RPL37/RPLP2/RPS24/RPS6/RPL19/RPS12/RPLP1/RPL12/RPL37A/RPS9/RPL31	19
BP	GO:0019080	viral gene expression	25/442	102/5658	1.58153e-07	3.38364e-06	2.017e-06	RPS15/ZFP36/RPL18/RPL8/RPS25/JUN/TPR/RPS27A/RPL28/RPL10/RPL23A/RPL37/RPLP2/RPS24/RPS6/RPL19/POLR2L/RPS12/NUP160/POLR2J/RPLP1/RPL12/RPL37A/RPS9/RPL31	25
BP	GO:0051962	positive regulation of nervous system development	42/442	233/5658	1.60863e-07	3.4236e-06	2.04082e-06	APOE/ID2/MMD2/PTPRD/PTPRZ1/SEMA5A/PTN/NLGN1/AGT/IL1RAPL1/LRP1/CUX1/FYN/GLI2/TUBB2B/DAB1/NRP1/SERPINE2/FN1/ZEB1/DSCAM/SYT1/SPAG9/GPR37L1/S100B/PARD3/IL6ST/EPHB1/ITGA6/NRXN1/GPRC5B/MEF2C/HIF1A/HSPA5/DICER1/BCL6/TIAM1/IQGAP1/FGFR1/TRAK1/HGF/CFLAR	42
CC	GO:0098590	plasma membrane region	67/441	482/5894	2.38642e-07	3.69895e-06	2.38642e-06	GJA1/TFRC/APC/PDGFRB/CADM1/GABRB1/DLC1/CFL1/CD38/NLGN1/IL1RAPL1/SLC7A11/LRP1/BMPR1A/ANTXR1/MINK1/TF/CPE/CNTFR/TNIK/GABRG1/SLC3A2/NLGN4X/CTNNA1/CDH13/NRP1/FN1/CD9/CASK/PTPRJ/DNM2/MSN/BST2/MYO10/KANK1/SYT1/ADCY8/GPR37L1/PARD3/AQP1/ADAM10/ABI1/HIP1R/DDR2/ITGA6/NRXN1/WLS/ABCC4/KSR1/CAMK2N1/ITGAV/ATP2B4/DLG1/HIP1/STAMBP/APPL2/GNA12/MAP7/SLC4A4/IL6R/SIPA1L3/DNM3/TIAM1/UTRN/PKD2/ADORA1/PTCH1	67
BP	GO:1902532	negative regulation of intracellular signal transduction	39/442	209/5658	1.78117e-07	3.75154e-06	2.2363e-06	HSPA1A/APOE/HSPB1/TMSB4X/STMN1/CLU/PEBP1/DLC1/ENO1/TAOK3/DUSP1/DAB1/SERPINE2/ITCH/PTPRJ/PRNP/TGFB2/KANK1/SORL1/TSC2/NDRG2/SOCS3/SEC14L1/FOXO1/PTPRT/HIF1A/CAMK2N1/ATP2B4/ATM/DDIT4/STAT1/DLG1/NR1D1/STAMBP/BCL6/PKD2/SRI/EPM2A/FBLN1	39
CC	GO:0099572	postsynaptic specialization	26/441	116/5894	2.58685e-07	3.87135e-06	2.49765e-06	MT3/DNAJB1/NLGN1/MINK1/RPL8/FYN/TNIK/NLGN4X/RPS25/DAB1/DNM2/PRNP/STAT3/TSC2/ADCY8/ADAM10/ABI1/HIP1R/CAMK2N1/DLG1/IGSF11/DNM3/TIAM1/RPL12/ADORA1/PTCH1	26
BP	GO:0032269	negative regulation of cellular protein metabolic process	63/442	422/5658	1.93945e-07	4.05434e-06	2.41681e-06	HSPA1A/APOE/HSPB1/MT3/HSPA1B/APC/PEBP1/LDLRAD4/PTN/AGT/ZFP36L1/GADD45B/GABARAPL2/ZFP36/TAOK3/FYN/DUSP1/TOB1/SERPINE2/PML/JUN/TPR/ITCH/PTPRJ/PRNP/BST2/LGALS3/SMARCC1/STAT3/OPHN1/ANGPT1/UBASH3B/SORL1/TSC2/NDRG2/WFDC1/PARD3/RGN/JARID2/SOCS3/AQP1/FOXO1/PTPRT/PPARGC1A/SH3RF1/CAMK2N1/HIPK2/WWTR1/ATP2B4/DDIT4/DLG1/HNRNPD/C5/VPS28/YWHAE/KAT2B/IFI6/BIRC2/HGF/CAST/FBLN1/COL4A3/CFLAR	63
BP	GO:0010810	regulation of cell-substrate adhesion	26/442	110/5658	1.94489e-07	4.05434e-06	2.41681e-06	APOD/MAP4K4/DLC1/PTN/DOCK1/LIMS1/LRP1/MINK1/PREX1/CDH13/NRP1/FN1/CASK/PTPRJ/SEMA3E/DNM2/KANK1/DDR2/ITGA6/NEDD9/SDC4/BCL6/UTRN/IQGAP1/DOCK5/FBLN1	26
BP	GO:0006613	cotranslational protein targeting to membrane	19/442	64/5658	2.00622e-07	4.16086e-06	2.4803e-06	RPS15/RPL18/RPL8/RPS25/RPS27A/RPL28/RPL10/RPL23A/RPL37/RPLP2/RPS24/RPS6/RPL19/RPS12/RPLP1/RPL12/RPL37A/RPS9/RPL31	19
BP	GO:0070371	ERK1 and ERK2 cascade	31/442	147/5658	2.09077e-07	4.31421e-06	2.57171e-06	APOE/MT3/FGFR2/PRKCA/PDGFRB/AGT/ZFP36L1/LRP1/CHI3L1/CCL2/FGF2/DUSP1/NRP1/FN1/SOX9/JUN/FGFR3/RAP1B/ANGPT1/NDRG2/EPHB1/CAMK2N1/ITGAV/DLG1/TIAM1/FRS2/CTSH/PDGFC/FBLN1/DDT/CFLAR	31
BP	GO:0030029	actin filament-based process	54/442	340/5658	2.11641e-07	4.34505e-06	2.5901e-06	GJA1/TMSB4X/STMN1/PDGFRB/SEMA5A/DLC1/CFL1/ARHGEF10/MYO1E/AKAP13/LRP1/ANTXR1/ACTG1/MINK1/TNIK/PREX1/PHACTR4/PRKG1/NRP1/GAB1/SEMA3E/GSN/BST2/KANK1/WASF2/OPHN1/ACTB/FGF12/MYO18A/AQP1/ABI1/HIP1R/SORBS1/ID1/ELN/MEF2C/NEDD9/SDC4/DLG1/HIP1/FRMD5/SH3PXD2B/S1PR1/BCL6/ARHGAP17/DIAPH2/RICTOR/TGFB3/ARHGEF10L/MYO9B/SRI/THSD7A/ADORA1/CFLAR	54
BP	GO:0022612	gland morphogenesis	21/442	77/5658	2.28068e-07	4.65878e-06	2.77711e-06	FGFR2/PTN/TNC/GLI2/SULF1/NRP1/SOX9/PML/MSN/LAMA1/TGFB2/ID4/NFIB/TGFB3/FGFR1/FRS2/HGF/NRG3/AR/PTCH1/CFLAR	21
MF	GO:0003735	structural constituent of ribosome	19/438	63/5628	1.42825e-07	4.67805e-06	3.31597e-06	RPS15/RPL18/RPL8/RPS25/RPS27A/RPL28/RPL10/RPL23A/RPL37/RPLP2/RPS24/RPS6/RPL19/RPS12/RPLP1/RPL12/RPL37A/RPS9/RPL31	19
MF	GO:0044389	ubiquitin-like protein ligase binding	27/438	116/5628	1.45921e-07	4.67805e-06	3.31597e-06	HSPA1A/HSP90AA1/HSPA1B/CLU/APC/GABARAPL2/ACTG1/TNK2/PML/JUN/ITCH/UBB/RPS27A/DTX1/UBASH3B/FOXO1/PPARGC1A/HIF1A/UBC/STAT1/HSPA5/TXNIP/JAK1/YWHAE/STAT2/TUBA1B/HSPA8	27
BP	GO:0048729	tissue morphogenesis	52/442	323/5658	2.33684e-07	4.74962e-06	2.83126e-06	GPC6/FGFR2/GJA1/NR4A3/DLC1/CFL1/STK3/AGT/TNC/HES5/SMURF2/BMPR1A/FGF2/GLI2/SULF1/PHACTR4/NRP1/SOX9/PML/SEMA3E/MSN/LAMA1/TGFB2/FGF1/INTU/OPHN1/TSC2/SOCS3/RBPJ/LHX2/NRG1/WLS/YAP1/MEF2C/HIF1A/ZNRF3/ID4/SDC4/STAT1/DLG1/S1PR1/TIAM1/FGFR1/TULP3/FRS2/PKD2/CTSH/HGF/AR/TGFBR3/PTCH1/ARID1A	52
BP	GO:0050679	positive regulation of epithelial cell proliferation	25/442	104/5658	2.37114e-07	4.79536e-06	2.85853e-06	FGFR2/PRKCA/GLUL/NR4A3/SEMA5A/PTN/TCF7L2/BMPR1A/NR4A1/F3/FGF2/CDH13/NRP1/SOX9/JUN/STAT3/FGF1/SRSF6/ID1/HIF1A/HTRA1/RICTOR/FGFR1/AR/CFLAR	25
CC	GO:0044445	cytosolic part	25/441	110/5894	3.32998e-07	4.81737e-06	3.10798e-06	RPS15/APOD/ENO1/RPL18/RPL8/RPS25/RPS27A/RPL28/RPL10/RPL23A/TSC2/RPL37/RPLP2/PPARGC1A/RPS24/RPS6/RPL19/RPS12/RPLP1/RPL12/RPL37A/RPS9/HSPA8/RPL31/CFLAR	25
BP	GO:0032101	regulation of response to external stimulus	60/442	397/5658	2.54791e-07	5.12736e-06	3.05643e-06	APOE/HSPB1/MT3/GJA1/TMSB4X/PRKCA/APOD/CLU/PDGFRB/CCK/SEMA5A/PTN/AGT/LRP1/NEAT1/CCL2/CXCL14/F3/FGF2/DUSP1/PRKG1/TUBB2B/CDH13/NRP1/SERPINE2/CD9/CASK/ITCH/SEMA3E/DSCAM/IL33/FGF1/UBASH3B/WFDC1/SOCS3/SEC14L1/ADAM10/IL6ST/NRXN1/GPRC5B/SASH1/ATM/ADORA2B/STAT1/NR1D1/APPL2/C5/IL6R/S1PR1/BCL6/HTRA1/TIAM1/RICTOR/FGFR1/ADAMTS18/BIRC2/HGF/ADORA1/DDT/HLA-E	60
BP	GO:0090101	negative regulation of transmembrane receptor protein serine/threonine kinase signaling pathway	19/442	65/5658	2.6334e-07	5.27328e-06	3.14342e-06	HSPA1A/LDLRAD4/SMURF2/PRDM16/LTBP1/TOB1/DNM2/UBB/RPS27A/SORL1/HIPK2/UBC/HSPA5/CHST11/HTRA1/TGFB3/CHRDL1/FBN2/TGFBR3	19
BP	GO:0043524	negative regulation of neuron apoptotic process	18/442	59/5658	2.67059e-07	5.31681e-06	3.16937e-06	APOE/MT3/NR4A3/PTPRZ1/NR4A2/LRP1/CCL2/CNTFR/FYN/NRP1/JUN/ANGPT1/PPARGC1A/MEF2C/HIF1A/HIPK2/STAMBP/TGFB3	18
BP	GO:0030512	negative regulation of transforming growth factor beta receptor signaling pathway	15/442	42/5658	2.6813e-07	5.31681e-06	3.16937e-06	HSPA1A/LDLRAD4/SMURF2/PRDM16/LTBP1/DNM2/UBB/RPS27A/UBC/HSPA5/CHST11/HTRA1/TGFB3/FBN2/TGFBR3	15
BP	GO:0061024	membrane organization	49/442	298/5658	2.78309e-07	5.49188e-06	3.27373e-06	HSPA1A/APOE/HSP90AA1/MT3/PRKCA/CLU/PTPRD/TFRC/PLSCR1/PTN/NLGN1/IL1RAPL1/DOCK1/SLC7A11/ACTG1/TF/PPIA/NLGN4X/VAV3/PIK3C2A/PSAP/CD9/DNM2/GSN/TGFB2/UBB/RPS27A/NDRG1/STAT3/SYT1/MBP/ACTB/MYO18A/HIP1R/NRXN1/ABCA1/UBC/MFGE8/DLG1/HIP1/APPL2/MEGF10/DNM3/YWHAE/AP3B1/AR/ARFGAP3/HSPA8/EPN2	49
BP	GO:0051897	positive regulation of protein kinase B signaling	21/442	78/5658	2.89875e-07	5.69247e-06	3.3933e-06	HSP90AA1/FGFR2/PDGFRB/SEMA5A/TCF7L2/STK3/CHI3L1/FYN/F3/FGF2/GAB1/PTPRJ/FGFR3/FGF1/ANGPT1/NRG1/HIP1/RICTOR/FGFR1/FRS2/HGF	21
BP	GO:1901652	response to peptide	39/442	213/5658	2.9958e-07	5.85477e-06	3.49004e-06	GJA1/NR4A3/APC/NR4A2/AGT/ZFP36L1/LRP1/NR4A1/JUND/FYN/CCND3/PHIP/PIK3C2A/SLC27A1/GAB1/PRNP/SMARCC1/KANK1/STAT3/EGR1/SRSF6/RAP1B/SORL1/TSC2/ADCY8/SOCS3/FOXO1/SORBS1/ID1/ATP6V0E1/STAT1/APPL2/NAMPT/KAT2B/STAT2/IQGAP1/TGFBR3/GHR/CFLAR	39
CC	GO:0044456	synapse part	50/441	324/5894	4.2062e-07	5.88868e-06	3.79915e-06	APOE/MT3/GLUL/CCK/GABRB1/DNAJB1/PTN/NLGN1/IL1RAPL1/ACTG1/MINK1/CPE/RPL8/FYN/TNIK/GABRG1/NLGN4X/RPS25/DAB1/NRP1/CASK/DNM2/FUS/PRNP/STAT3/SYT1/OPHN1/ACTB/TSC2/ADCY8/ADAM10/ABI1/HIP1R/LGI1/NRXN1/MEF2C/CAMK2N1/ATP2B4/DLG1/NR1D1/HIP1/IGSF11/DNM3/TIAM1/RPL12/UTRN/SRI/ADORA1/PTCH1/HSPA8	50
BP	GO:0045765	regulation of angiogenesis	33/442	165/5658	3.1283e-07	6.08448e-06	3.62697e-06	HSPB1/PRKCA/GLUL/SEMA5A/PTN/AGT/CHI3L1/F3/FGF2/SULF1/NRP1/PIK3C2A/S100A1/PML/GAB1/SEMA3E/TGFB2/STAT3/FGF1/AQP1/ITGB8/ID1/HIF1A/SASH1/HIPK2/PTPRM/STAT1/ADAMTS9/JAK1/CTSH/HGF/COL4A3/EPN2	33
BP	GO:0120035	regulation of plasma membrane bounded cell projection organization	46/442	273/5658	3.20444e-07	6.17839e-06	3.68296e-06	APOE/MT3/PTPRD/APC/MAP4K4/SEMA5A/PTN/CFL1/CD38/NLGN1/AGT/IL1RAPL1/LRP1/PMP22/CUX1/FYN/TNIK/PREX1/TUBB2B/DAB1/NRP1/FN1/B2M/PRRX1/SEMA3E/DNM2/PRNP/DSCAM/MYO10/KANK1/PTPRG/SYT1/WASF2/ADAM10/ITGA6/ID1/MEF2C/HSPA5/DNM3/TIAM1/TGFB3/IQGAP1/FGFR1/TRAK1/HGF/CFLAR	46
BP	GO:0035265	organ growth	22/442	85/5658	3.20699e-07	6.17839e-06	3.68296e-06	FGFR2/GJA1/PDGFRB/STK3/AGT/AKAP13/BMPR1A/FGF2/NLGN4X/SOX9/PSAP/FGFR3/TGFB2/JARID2/RBPJ/DDR2/YAP1/MEF2C/S1PR1/FGFR1/AR/TGFBR3	22
BP	GO:0009894	regulation of catabolic process	56/442	363/5658	3.35949e-07	6.43407e-06	3.83537e-06	HSPA1A/APOE/HSPB1/HSP90AA1/MT3/HSPA1B/GJA1/PRKCA/CLU/APC/ZFP36L1/GABARAPL2/LRP1/SMURF2/ZFP36/FYN/TOB1/WDR6/SERPINE2/SOX9/PML/PSAP/TPR/ITCH/MSN/HNRNPM/IL33/UBB/SMARCC1/RPS27A/STAT3/OPHN1/CSNK1A1/SORL1/TSC2/RGN/FOXO1/PPARGC1A/NRG1/HIF1A/HIPK2/ATP6V0E1/UBC/ATP2B4/ATM/DDIT4/HNRNPD/GNA12/NAMPT/NUP160/VPS28/TAB2/EPM2A/HGF/ADORA1/HSPA8	56
BP	GO:0046677	response to antibiotic	31/442	150/5658	3.37136e-07	6.43407e-06	3.83537e-06	HSP90AA1/FGFR2/CLU/NR4A3/PDGFRB/TNC/ITPR2/MAP3K5/FYN/DUSP1/JUN/PSAP/GSN/STAT3/EGR1/ADCY8/GPR37L1/AQP1/FOXO1/ID1/MEF2C/SLC1A3/STAT1/HSPA5/HNRNPD/GNAO1/TXNIP/JAK1/BIRC2/CAPN2/HGF	31
BP	GO:0071241	cellular response to inorganic substance	23/442	92/5658	3.40839e-07	6.47435e-06	3.85938e-06	MT3/ID2/FOS/NLGN1/TF/JUND/B2M/JUN/DNM2/FUS/GSN/PRNP/SYT1/ADCY8/AQP1/FOXO1/PPARGC1A/MEF2C/HSPA5/HNRNPD/IQGAP1/PKD2/CFLAR	23
BP	GO:0007423	sensory organ development	45/442	265/5658	3.45581e-07	6.5339e-06	3.89488e-06	FGFR2/GJA1/NR4A3/PDGFRB/PTN/SLC7A11/BMPR1B/MEIS2/HES5/PRDM16/CXCL14/GLI2/PHACTR4/NRP1/SOX9/PRRX1/JUN/PSAP/ZEB1/LAMA1/EFEMP1/DSCAM/TGFB2/STAT3/ADAM10/RBPJ/EPHB1/LHX2/HIF1A/HIPK2/MERTK/PTPRM/ATP2B4/SDC4/DLG1/SH3PXD2B/SIPA1L3/TGFB3/FGFR1/TULP3/FRS2/CHRDL1/ADAMTS18/FBN2/ARID1A	45
BP	GO:0006897	endocytosis	52/442	328/5658	3.8596e-07	7.23007e-06	4.30987e-06	APOE/HSP90AA1/CLU/TFRC/MYO1E/NLGN1/DOCK1/LRP1/ACTG1/TF/CCL2/RIN2/FYN/ZFYVE16/NLGN4X/CDH13/VAV3/TNK2/B2M/PIK3C2A/CD63/CD9/PTPRJ/DNM2/GSN/LGALS3/MYO10/RAMP1/SYT1/WASF2/OPHN1/ANGPT1/ACTB/SORL1/MYO18A/TSC2/ABI1/HIP1R/ABCA1/ITGAV/MERTK/MFGE8/VAV2/HIP1/APPL2/MEGF10/DNM3/VPS28/ADORA1/NR1H2/GHR/EPN2	52
BP	GO:0009611	response to wounding	52/442	328/5658	3.8596e-07	7.23007e-06	4.30987e-06	APOE/HSPB1/FGFR2/GJA1/PRKCA/GNA14/APOD/PDGFRB/PLSCR1/PTN/TNC/DOCK1/SLC7A11/ZFP36L1/ITPR2/LRP1/ZFP36/ACTG1/MAP3K5/FYN/F3/FGF2/PRKG1/CTNNA1/VAV3/NRP1/SERPINE2/FN1/JUN/CD9/CASK/GSN/TGFB2/KANK1/SRSF6/UBASH3B/ACTB/ENTPD1/WFDC1/NRG1/YAP1/HIF1A/SLC1A3/MERTK/SDC4/VAV2/GNA12/TGFB3/AP3B1/ADAMTS18/FBLN1/CFLAR	52
BP	GO:0052548	regulation of endopeptidase activity	34/442	175/5658	4.24367e-07	7.91307e-06	4.717e-06	MT3/PEBP1/CCK/DLC1/AGT/MAP3K5/FYN/F3/SERPINE2/PML/FAS/GSN/BST2/STAT3/MBP/EGLN3/SORL1/WFDC1/CRADD/AQP1/HIP1R/SH3RF1/HIP1/C5/ST18/YWHAE/ASPH/IFI6/CTSH/BIRC2/HGF/CAST/COL4A3/CFLAR	34
BP	GO:2001237	negative regulation of extrinsic apoptotic signaling pathway	18/442	61/5658	4.67116e-07	8.67045e-06	5.16848e-06	HSPA1A/HSPA1B/TCF7L2/TMBIM1/FYN/PHIP/CTNNA1/NRP1/FAS/LGALS3/ITGA6/SH3RF1/YAP1/ITGAV/IFI6/HGF/AR/CFLAR	18
BP	GO:0071375	cellular response to peptide hormone stimulus	27/442	122/5658	4.71562e-07	8.71318e-06	5.19395e-06	NR4A3/APC/NR4A2/AGT/ZFP36L1/NR4A1/FYN/CCND3/PHIP/PIK3C2A/GAB1/SMARCC1/KANK1/STAT3/RAP1B/SORL1/TSC2/ADCY8/SOCS3/FOXO1/SORBS1/ATP6V0E1/STAT1/APPL2/KAT2B/GHR/CFLAR	27
BP	GO:0019216	regulation of lipid metabolic process	32/442	160/5658	4.75527e-07	8.74668e-06	5.21392e-06	APOE/ID2/APOD/NR4A3/PDGFRB/AGT/SQLE/FGF2/VAV3/NCOR2/SLC27A1/PSAP/FGFR3/FGF1/EGR1/SORL1/NCOA6/RGN/SOCS3/SF1/SORBS1/PPARGC1A/ABCA1/TBL1X/VAV2/NR1D1/APPL2/PPP2R5A/CAPN2/NCOA2/ADORA1/NR1H2	32
MF	GO:0004672	protein kinase activity	40/438	222/5628	2.94364e-07	8.91269e-06	6.31764e-06	FGFR2/PRKCA/MMD2/CAMK2G/PDGFRB/MAP4K4/STK3/AKAP13/BMPR1B/BMPR1A/MINK1/TAOK3/CCL2/EPHA6/MAP3K5/FYN/TNIK/CCND3/LTBP1/PRKG1/TNK2/NRP1/RPS6KA2/CASK/EFEMP1/FGFR3/CSNK1A1/RPS6KA5/MAP3K14/EPHB1/DDR2/KSR1/HIPK2/MERTK/ATM/JAK1/STK10/FGFR1/NEK7/TGFBR3	40
MF	GO:0001664	G protein-coupled receptor binding	26/438	113/5628	3.18738e-07	9.14276e-06	6.48072e-06	HSPA1A/HSPA1B/GNA14/AGT/CCL2/CXCL14/FYN/PSAP/ITCH/DNM2/PRNP/STAT3/WLS/GPRC5B/ZNRF3/STAT1/GNAO1/GNA12/C5/JAK1/S1PR1/DNM3/TULP3/ADORA1/PTCH1/HSPA8	26
MF	GO:0003713	transcription coactivator activity	28/438	128/5628	3.43145e-07	9.35071e-06	6.62812e-06	RBPMS/PRDM16/MAML2/JUND/FGF2/ZMIZ1/WBP2/PRRX1/PML/JUN/ZEB1/FUS/SMARCC1/DTX1/NCOA6/PPARGC1A/YAP1/TADA3/HIPK2/WWTR1/NR1D1/KAT2B/PRMT2/BIRC2/NCOA2/NR1H2/PRPF6/ARID1A	28
BP	GO:0046578	regulation of Ras protein signal transduction	25/442	108/5658	5.14354e-07	9.38487e-06	5.59435e-06	APOE/STMN1/MMD2/PDGFRB/MAP4K4/PREX2/DLC1/ARHGEF10/AKAP13/PREX1/VAV3/NRP1/DNM2/TGFB2/KANK1/OPHN1/PLCE1/ABCA1/NRG1/VAV2/STAMBP/BCL6/TIAM1/ARHGEF10L/MYO9B	25
BP	GO:0001817	regulation of cytokine production	51/442	322/5658	5.20638e-07	9.38487e-06	5.59435e-06	HSPA1A/HSPB1/HSPA1B/TMSB4X/APOD/CLU/NR4A3/CADM1/AGT/LRP1/ZFP36/SULF1/LTBP1/FN1/B2M/PML/ITCH/PTPRJ/PRNP/BST2/TGFB2/IL33/STAT3/EGR1/ANGPT1/MBP/NDRG2/RPS6KA5/SEC14L1/IL6ST/ITGB8/GPRC5B/HIF1A/ITGAV/MERTK/ADORA2B/STAT1/DICER1/APPL2/POLR2L/C5/IL6R/BCL6/TGFB3/IQGAP1/FGFR1/BIRC2/CAPN2/HGF/DDT/HLA-E	51
BP	GO:0048736	appendage development	20/442	74/5658	5.21767e-07	9.38487e-06	5.59435e-06	FGFR2/GJA1/SLC7A11/BMPR1B/BMPR1A/GLI2/SOX9/PRRX1/TGFB2/INTU/ITGA6/ZNRF3/CHST11/GNA12/ASPH/KAT2B/FGFR1/TULP3/FBN2/PTCH1	20
BP	GO:0060173	limb development	20/442	74/5658	5.21767e-07	9.38487e-06	5.59435e-06	FGFR2/GJA1/SLC7A11/BMPR1B/BMPR1A/GLI2/SOX9/PRRX1/TGFB2/INTU/ITGA6/ZNRF3/CHST11/GNA12/ASPH/KAT2B/FGFR1/TULP3/FBN2/PTCH1	20
BP	GO:0070972	protein localization to endoplasmic reticulum	20/442	74/5658	5.21767e-07	9.38487e-06	5.59435e-06	RPS15/RPL18/RPL8/RPS25/RPS27A/RPL28/RPL10/RPL23A/RPL37/RPLP2/RPS24/RPS6/HSPA5/RPL19/RPS12/RPLP1/RPL12/RPL37A/RPS9/RPL31	20
BP	GO:0001654	eye development	33/442	169/5658	5.59701e-07	1.00228e-05	5.97465e-06	GJA1/PDGFRB/PTN/SLC7A11/BMPR1B/MEIS2/HES5/PHACTR4/NRP1/SOX9/JUN/ZEB1/LAMA1/EFEMP1/DSCAM/TGFB2/STAT3/EPHB1/LHX2/HIF1A/HIPK2/MERTK/PTPRM/ATP2B4/DLG1/SH3PXD2B/SIPA1L3/TULP3/FRS2/CHRDL1/ADAMTS18/FBN2/ARID1A	33
BP	GO:0030100	regulation of endocytosis	26/442	116/5658	5.94543e-07	1.06001e-05	6.31873e-06	APOE/CLU/NLGN1/LRP1/TF/CCL2/ZFYVE16/CDH13/TNK2/B2M/CD63/PTPRJ/DNM2/LGALS3/OPHN1/ANGPT1/MYO18A/TSC2/HIP1R/ITGAV/MERTK/MFGE8/HIP1/APPL2/VPS28/NR1H2	26
BP	GO:0038127	ERBB signaling pathway	18/442	62/5658	6.11502e-07	1.08076e-05	6.44246e-06	HSP90AA1/PRKCA/AGT/CDH13/SOX9/PIK3C2A/GAB1/PTPRJ/EFEMP1/RPS6KA5/PLCE1/RBPJ/HIP1R/NRG1/HIP1/IQGAP1/IFI6/ADORA1	18
BP	GO:1903844	regulation of cellular response to transforming growth factor beta stimulus	18/442	62/5658	6.11502e-07	1.08076e-05	6.44246e-06	HSPA1A/LDLRAD4/SMURF2/PRDM16/LTBP1/ZEB1/DNM2/UBB/RPS27A/HIPK2/UBC/HSPA5/CHST11/HTRA1/TGFB3/FBN2/TGFBR3/CFLAR	18
BP	GO:0030278	regulation of ossification	25/442	109/5658	6.19839e-07	1.09075e-05	6.50202e-06	ID2/FGFR2/GJA1/PTN/TOB2/BMPR1B/BMPR1A/JUND/TOB1/SOX9/DDX5/TGFB2/INTU/RBPJ/IL6ST/DDR2/ID1/MEF2C/HIF1A/IL6R/S1PR1/TGFB3/FBN2/HGF/PTCH1	25
BP	GO:0000122	negative regulation of transcription by RNA polymerase II	58/442	389/5658	6.61015e-07	1.1582e-05	6.90407e-06	HSPA1A/ID2/FGFR2/NR4A3/ETV6/DNAJB1/TCF7L2/NR4A2/HMBOX1/ENO1/MEIS2/HES5/SMURF2/ZFP36/PRDM16/HNRNPA2B1/CUX1/JUND/GLI2/CCND3/NCOR2/SOX9/PRRX1/S100A1/JUN/TPR/DDX5/ZEB1/UBB/RPS27A/STAT3/EGR1/RPL10/JARID2/FOXO1/RBPJ/CDC73/ID1/MEF2C/HIPK2/ID4/UBC/WWTR1/STAT1/DACH1/DLG1/TBL1X/DICER1/NR1D1/NFIB/TXNIP/BCL6/FGFR1/AR/NCOA2/PTCH1/NR1H2/ARID1A	58
BP	GO:0042060	wound healing	45/442	271/5658	6.67596e-07	1.16471e-05	6.94288e-06	APOE/HSPB1/FGFR2/GJA1/PRKCA/GNA14/APOD/PDGFRB/PLSCR1/PTN/TNC/DOCK1/SLC7A11/ITPR2/ACTG1/MAP3K5/FYN/F3/FGF2/PRKG1/VAV3/SERPINE2/FN1/CD9/CASK/GSN/TGFB2/KANK1/SRSF6/UBASH3B/ACTB/ENTPD1/WFDC1/NRG1/YAP1/HIF1A/MERTK/SDC4/VAV2/GNA12/TGFB3/AP3B1/ADAMTS18/FBLN1/CFLAR	45
BP	GO:0032880	regulation of protein localization	57/442	380/5658	6.81915e-07	1.17502e-05	7.00432e-06	APOE/HSP90AA1/GPC6/GJA1/TMSB4X/PRKCA/MMD2/APOD/GLUL/APC/CADM1/MAP4K4/PTN/TCF7L2/CD38/NLGN1/SLC7A11/ITPR2/LRP1/TMBIM1/PPIA/FYN/GPC5/FN1/PML/TPR/GSN/MSN/PRNP/LGALS3/TGFB2/IL33/ANGPT1/MBP/ACTB/SORL1/MYO18A/ADCY8/ADAM10/SORBS1/WLS/HIF1A/DLG1/NR1D1/HMGN3/C5/VPS28/YWHAE/TIAM1/PPP2R5A/TGFB3/IQGAP1/SRI/AR/PTCH1/HSPA8/HLA-E	57
BP	GO:0007507	heart development	46/442	280/5658	6.82176e-07	1.17502e-05	7.00432e-06	ID2/FGFR2/GJA1/PDGFRB/DLC1/PTN/STK3/AGT/ZFP36L1/AKAP13/BMPR1A/CPE/FGF2/GLI2/LTBP1/ZMIZ1/NRP1/SOX9/JUN/DNM2/TGFB2/FGF12/TSC2/NCOA6/PLCE1/JARID2/RBPJ/ID1/NRG1/YAP1/ELN/MEF2C/HIF1A/ATM/SH3PXD2B/ADAMTS9/S1PR1/KAT2B/FGFR1/FRS2/PKD2/SRI/TAB2/TGFBR3/PTCH1/ARID1A	46
BP	GO:0031344	regulation of cell projection organization	46/442	280/5658	6.82176e-07	1.17502e-05	7.00432e-06	APOE/MT3/PTPRD/APC/MAP4K4/SEMA5A/PTN/CFL1/CD38/NLGN1/AGT/IL1RAPL1/LRP1/PMP22/CUX1/FYN/TNIK/PREX1/TUBB2B/DAB1/NRP1/FN1/B2M/PRRX1/SEMA3E/DNM2/PRNP/DSCAM/MYO10/KANK1/PTPRG/SYT1/WASF2/ADAM10/ITGA6/ID1/MEF2C/HSPA5/DNM3/TIAM1/TGFB3/IQGAP1/FGFR1/TRAK1/HGF/CFLAR	46
BP	GO:0099175	regulation of postsynapse organization	13/442	34/5658	6.86006e-07	1.17663e-05	7.01393e-06	APOE/PTPRD/PTN/CFL1/NLGN1/IL1RAPL1/SLC7A11/FYN/PRNP/ADAM10/NRXN1/DNM3/TIAM1	13
BP	GO:0030036	actin cytoskeleton organization	48/442	298/5658	6.99366e-07	1.19451e-05	7.12048e-06	TMSB4X/STMN1/PDGFRB/SEMA5A/DLC1/CFL1/ARHGEF10/AKAP13/LRP1/ANTXR1/ACTG1/MINK1/TNIK/PREX1/PHACTR4/PRKG1/NRP1/GAB1/SEMA3E/GSN/BST2/KANK1/WASF2/OPHN1/ACTB/MYO18A/AQP1/ABI1/HIP1R/SORBS1/ID1/ELN/MEF2C/NEDD9/SDC4/DLG1/HIP1/FRMD5/SH3PXD2B/S1PR1/BCL6/ARHGAP17/DIAPH2/RICTOR/TGFB3/ARHGEF10L/THSD7A/CFLAR	48
BP	GO:0001558	regulation of cell growth	32/442	163/5658	7.37e-07	1.25352e-05	7.47225e-06	HSPA1A/APOE/MT3/HSPA1B/GJA1/SEMA5A/CD38/ENO1/AGT/LRP1/NRP1/SERPINE2/FN1/PML/ITCH/PTPRJ/SEMA3E/DNM2/DSCAM/BST2/TGFB2/SYT1/WFDC1/PLCE1/OSGIN2/ADAM10/LGI1/CDC73/RERG/EAF2/BCL6/NRG3	32
BP	GO:2000116	regulation of cysteine-type endopeptidase activity	25/442	110/5658	7.44941e-07	1.26174e-05	7.52129e-06	MT3/CCK/DLC1/MAP3K5/FYN/F3/PML/FAS/GSN/EGLN3/CRADD/AQP1/HIP1R/SH3RF1/HIP1/ST18/YWHAE/ASPH/IFI6/CTSH/BIRC2/HGF/CAST/COL4A3/CFLAR	25
BP	GO:0050769	positive regulation of neurogenesis	37/442	204/5658	7.81843e-07	1.31875e-05	7.86111e-06	APOE/ID2/MMD2/PTPRD/PTPRZ1/SEMA5A/PTN/NLGN1/AGT/IL1RAPL1/LRP1/CUX1/FYN/GLI2/TUBB2B/DAB1/NRP1/SERPINE2/FN1/ZEB1/DSCAM/SYT1/SPAG9/IL6ST/ITGA6/GPRC5B/MEF2C/HIF1A/HSPA5/DICER1/BCL6/TIAM1/IQGAP1/FGFR1/TRAK1/HGF/CFLAR	37
BP	GO:0001816	cytokine production	55/442	363/5658	7.87865e-07	1.32342e-05	7.88894e-06	HSPA1A/HSPB1/HSPA1B/TMSB4X/APOD/CLU/NR4A3/CADM1/AGT/LRP1/ZFP36/CHI3L1/SULF1/LTBP1/FN1/B2M/PML/ITCH/PTPRJ/PRNP/BST2/TGFB2/IL33/STAT3/EGR1/ANGPT1/MBP/NDRG2/RPS6KA5/SEC14L1/RBPJ/IL6ST/ITGB8/ABCA1/GPRC5B/HIF1A/ITGAV/MERTK/ADORA2B/STAT1/DLG1/DICER1/APPL2/POLR2L/C5/IL6R/BCL6/TGFB3/IQGAP1/FGFR1/BIRC2/CAPN2/HGF/DDT/HLA-E	55
BP	GO:0045862	positive regulation of proteolysis	31/442	156/5658	8.37242e-07	1.39483e-05	8.31463e-06	HSPA1A/APOE/HSPA1B/CLU/CCK/DLC1/ENO1/ANTXR1/MAP3K5/FYN/F3/FN1/PML/FAS/GSN/IL33/STAT3/CSNK1A1/MBP/EGLN3/CRADD/RGN/HIP1R/HIP1/ST18/ASPH/SPON1/CTSH/FBLN1/COL4A3/CFLAR	31
BP	GO:1901653	cellular response to peptide	31/442	156/5658	8.37242e-07	1.39483e-05	8.31463e-06	NR4A3/APC/NR4A2/AGT/ZFP36L1/LRP1/NR4A1/FYN/CCND3/PHIP/PIK3C2A/GAB1/PRNP/SMARCC1/KANK1/STAT3/RAP1B/SORL1/TSC2/ADCY8/SOCS3/FOXO1/SORBS1/ID1/ATP6V0E1/STAT1/APPL2/NAMPT/KAT2B/GHR/CFLAR	31
BP	GO:0018108	peptidyl-tyrosine phosphorylation	33/442	172/5658	8.52891e-07	1.40935e-05	8.40117e-06	FGFR2/PDGFRB/CCK/AGT/HES5/EPHA6/FYN/TNK2/NRP1/PTPRJ/PRNP/EFEMP1/FGFR3/STAT3/ANGPT1/SOCS3/ABI1/IL6ST/EPHB1/DDR2/NRG1/GPRC5B/NEDD9/MERTK/IL6R/JAK1/RICTOR/IQGAP1/FGFR1/PDGFC/HGF/ADORA1/GHR	33
BP	GO:0018212	peptidyl-tyrosine modification	33/442	172/5658	8.52891e-07	1.40935e-05	8.40117e-06	FGFR2/PDGFRB/CCK/AGT/HES5/EPHA6/FYN/TNK2/NRP1/PTPRJ/PRNP/EFEMP1/FGFR3/STAT3/ANGPT1/SOCS3/ABI1/IL6ST/EPHB1/DDR2/NRG1/GPRC5B/NEDD9/MERTK/IL6R/JAK1/RICTOR/IQGAP1/FGFR1/PDGFC/HGF/ADORA1/GHR	33
BP	GO:0009790	embryo development	62/442	430/5658	8.63156e-07	1.42054e-05	8.46787e-06	ID2/FGFR2/GJA1/NR4A3/DLC1/CFL1/MYO1E/STK3/ZFP36L1/HES5/BMPR1A/FGF2/GLI2/SULF1/PHACTR4/ZMIZ1/TUBB2B/NRP1/FN1/SOX9/PRRX1/ZEB1/LAMA1/EFEMP1/TGFB2/TET1/RPL10/INTU/ANGPT1/MBP/TSC2/SOCS3/FUT8/ADAM10/RBPJ/ABI1/LHX2/CDC73/WLS/YAP1/MEF2C/HIF1A/ITGAV/HIPK2/RPS6/SDC4/ATM/DLG1/CHST11/GNA12/RICTOR/TGFB3/FGFR1/TULP3/FRS2/PKD2/FBN2/CAPN2/PDGFC/AR/PTCH1/ARID1A	62
BP	GO:0048871	multicellular organismal homeostasis	37/442	205/5658	8.86031e-07	1.4523e-05	8.65723e-06	HSPB1/GJA1/STMN1/PRKCA/TFRC/NR4A3/APC/ALDH1A1/CD38/PRDM16/ACTG1/TF/SOX9/B2M/ZNF423/SLC27A1/UBB/STAT3/EGR1/UBASH3B/ACTB/ADCY8/AQP1/FOXO1/RBPJ/PPARGC1A/ID1/YAP1/WWTR1/NR1D1/APPL2/S1PR1/CTSH/PDGFC/ADORA1/NR1H2/PRDX1	37
BP	GO:0036293	response to decreased oxygen levels	31/442	157/5658	9.68792e-07	1.58158e-05	9.42785e-06	MT3/PTN/CD38/NR4A2/ENO1/ZFP36L1/ITPR2/PML/TGFB2/UBB/RPS27A/NDRG1/EGR1/EGLN3/S100B/AQP1/RBPJ/PPARGC1A/HIF1A/HIPK2/UBC/ATM/DDIT4/HP1BP3/NAMPT/TGFB3/BIRC2/CAPN2/ADORA1/TGFBR3/CFLAR	31
BP	GO:0150063	visual system development	33/442	173/5658	9.78742e-07	1.59143e-05	9.48659e-06	GJA1/PDGFRB/PTN/SLC7A11/BMPR1B/MEIS2/HES5/PHACTR4/NRP1/SOX9/JUN/ZEB1/LAMA1/EFEMP1/DSCAM/TGFB2/STAT3/EPHB1/LHX2/HIF1A/HIPK2/MERTK/PTPRM/ATP2B4/DLG1/SH3PXD2B/SIPA1L3/TULP3/FRS2/CHRDL1/ADAMTS18/FBN2/ARID1A	33
BP	GO:0030522	intracellular receptor signaling pathway	26/442	119/5658	1.00478e-06	1.62726e-05	9.70016e-06	HSPA1A/HSPA1B/NR4A3/NR4A2/NR4A1/NCOR2/WBP2/PML/ITCH/DDX5/UBB/RPS27A/STAT3/NCOA6/SEC14L1/PPARGC1A/YAP1/TADA3/UBC/NR1D1/PRMT2/TAB2/BIRC2/AR/NR1H2/ARID1A	26
BP	GO:0060341	regulation of cellular localization	51/442	329/5658	1.02381e-06	1.6515e-05	9.84467e-06	HSP90AA1/GPC6/APOD/GLUL/APC/MAP4K4/PTN/TCF7L2/NLGN1/SLC7A11/ZFP36L1/LRP1/ZFP36/GAB2/TMBIM1/FYN/GPC5/PML/CASK/TPR/GSN/MSN/PRNP/LGALS3/SYT1/RAP1B/OPHN1/ANGPT1/UBASH3B/ACTB/SORL1/ADCY8/PARD3/ADAM10/SORBS1/NRXN1/MEF2C/HIF1A/ADORA2B/DLG1/NR1D1/HMGN3/DNM3/VPS28/YWHAE/TIAM1/PPP2R5A/IQGAP1/PKD2/SRI/AR	51
BP	GO:0060627	regulation of vesicle-mediated transport	36/442	198/5658	1.04382e-06	1.67713e-05	9.99743e-06	APOE/CLU/NLGN1/IL1RAPL1/LRP1/TF/GAB2/CCL2/ZFYVE16/CDH13/TNK2/NRP1/B2M/CD63/CASK/PTPRJ/DNM2/MSN/LGALS3/SYT1/RAP1B/OPHN1/ANGPT1/SORL1/MYO18A/TSC2/HIP1R/ITGAV/MERTK/SDC4/ADORA2B/MFGE8/HIP1/APPL2/VPS28/NR1H2	36
BP	GO:0030850	prostate gland development	12/442	30/5658	1.05067e-06	1.68149e-05	1.00234e-05	FGFR2/TNC/GLI2/SULF1/SOX9/PSAP/SMARCC1/ID4/EAF2/FRS2/AR/PTCH1	12
BP	GO:0050808	synapse organization	31/442	158/5658	1.11927e-06	1.78104e-05	1.06169e-05	APOE/PTPRD/PTN/CFL1/NLGN1/TNC/IL1RAPL1/SLC7A11/ACTG1/FYN/NLGN4X/NRP1/TUBA1A/SEMA3E/PRNP/DSCAM/NDRG1/WASF2/OPHN1/ACTB/BCAN/ADAM10/EPHB1/NRXN1/NRG1/MEF2C/DLG1/DNM3/TIAM1/UTRN/CAST	31
BP	GO:0048880	sensory system development	33/442	174/5658	1.12164e-06	1.78104e-05	1.06169e-05	GJA1/PDGFRB/PTN/SLC7A11/BMPR1B/MEIS2/HES5/PHACTR4/NRP1/SOX9/JUN/ZEB1/LAMA1/EFEMP1/DSCAM/TGFB2/STAT3/EPHB1/LHX2/HIF1A/HIPK2/MERTK/PTPRM/ATP2B4/DLG1/SH3PXD2B/SIPA1L3/TULP3/FRS2/CHRDL1/ADAMTS18/FBN2/ARID1A	33
BP	GO:0099536	synaptic signaling	41/442	241/5658	1.1312e-06	1.78924e-05	1.06657e-05	APOE/PTPRD/GLUL/GABRB1/PTN/CD38/NLGN1/AGT/IL1RAPL1/SLC7A11/PMP22/MINK1/CCL2/FYN/GABRG1/TUBB2B/NLGN4X/SERPINE2/CASK/PRNP/STAT3/SST/SYT1/RAP1B/OPHN1/MBP/FGF12/ADCY8/S100B/EPHB1/LGI1/NRXN1/NRG1/MEF2C/SLC1A3/ADORA2B/DLG1/IGSF11/NRG3/ADORA1/HSPA8	41
BP	GO:0050731	positive regulation of peptidyl-tyrosine phosphorylation	23/442	98/5658	1.14346e-06	1.79656e-05	1.07093e-05	CCK/AGT/HES5/FYN/TNK2/NRP1/PTPRJ/PRNP/FGFR3/STAT3/ANGPT1/SOCS3/ABI1/IL6ST/NRG1/GPRC5B/NEDD9/IL6R/RICTOR/IQGAP1/HGF/ADORA1/GHR	23
BP	GO:0043523	regulation of neuron apoptotic process	22/442	91/5658	1.14467e-06	1.79656e-05	1.07093e-05	APOE/MT3/NR4A3/PTPRZ1/NR4A2/LRP1/CCL2/CNTFR/FYN/NRP1/JUN/PRNP/TGFB2/ANGPT1/EGLN3/PPARGC1A/MEF2C/HIF1A/HIPK2/ATM/STAMBP/TGFB3	22
BP	GO:0048608	reproductive structure development	36/442	199/5658	1.18349e-06	1.84326e-05	1.09877e-05	FGFR2/GJA1/PDGFRB/PTN/STK3/TNC/ZFP36L1/BMPR1B/GLI2/SULF1/CTNNA1/SERPINE2/SOX9/PSAP/TGFB2/UBB/SMARCC1/SOCS3/SF1/RBPJ/ITGB8/HIF1A/MERTK/ID4/RPS6/ATM/DLG1/HSPA5/EAF2/HTRA1/FRS2/PKD2/BIRC2/AR/PTCH1/ARID1A	36
BP	GO:0061458	reproductive system development	36/442	199/5658	1.18349e-06	1.84326e-05	1.09877e-05	FGFR2/GJA1/PDGFRB/PTN/STK3/TNC/ZFP36L1/BMPR1B/GLI2/SULF1/CTNNA1/SERPINE2/SOX9/PSAP/TGFB2/UBB/SMARCC1/SOCS3/SF1/RBPJ/ITGB8/HIF1A/MERTK/ID4/RPS6/ATM/DLG1/HSPA5/EAF2/HTRA1/FRS2/PKD2/BIRC2/AR/PTCH1/ARID1A	36
BP	GO:0034330	cell junction organization	29/442	143/5658	1.23317e-06	1.9133e-05	1.14052e-05	GJA1/PRKCA/APOD/APC/CADM1/MAP4K4/DLC1/AGT/LIMS1/LRP1/ACTG1/NLGN4X/CTNNA1/CDH13/NRP1/FN1/CD9/PTPRJ/TGFB2/RAP1B/OPHN1/ACTB/PARD3/SORBS1/ITGA6/SDC4/DLG1/TGFB3/IQGAP1	29
BP	GO:0044089	positive regulation of cellular component biogenesis	37/442	208/5658	1.28133e-06	1.98046e-05	1.18056e-05	HSPA1A/HSP90AA1/HSPA1B/PRKCA/CLU/PTPRD/APC/CCK/MAP4K4/ARHGEF10/NLGN1/AGT/IL1RAPL1/LIMS1/NRP1/SOX9/JUN/TPR/PTPRJ/DNM2/GSN/MSN/WASF2/HIP1R/EPHB1/NRXN1/ABCA1/ID1/SDC4/ATM/DLG1/SH3PXD2B/DNM3/RICTOR/TGFB3/IQGAP1/ARHGEF10L	37
BP	GO:0019221	cytokine-mediated signaling pathway	56/442	378/5658	1.30216e-06	2.00502e-05	1.1952e-05	HSPA1A/HSP90AA1/MT3/HSPA1B/TMSB4X/FOS/PTPRZ1/CAMK2G/CFL1/LIMS1/HNRNPA2B1/GAB2/CCL2/CNTFR/PPIA/FYN/F3/FGF2/FN1/B2M/PML/SLC27A1/ZEB1/MSN/BST2/IL33/UBB/RPS27A/STAT3/EGR1/RAP1B/ANGPT1/RPS6KA5/MAP3K14/SOCS3/FOXO1/IL6ST/HIF1A/UBC/STAT1/IFIT3/APPL2/IL6R/JAK1/S1PR1/BCL6/ST18/STAT2/IFI6/TAB2/BIRC2/HGF/HSPA8/NR1H2/GHR/HLA-E	56
BP	GO:0007265	Ras protein signal transduction	36/442	200/5658	1.34036e-06	2.05607e-05	1.22563e-05	APOE/STMN1/MMD2/PDGFRB/MAP4K4/PREX2/DLC1/CFL1/ARHGEF10/AKAP13/FGF2/PREX1/PHACTR4/CDH13/VAV3/NRP1/JUN/DNM2/TGFB2/KANK1/WASF2/RAP1B/OPHN1/PLCE1/ARHGAP29/ABCA1/NRG1/KSR1/VAV2/STAMBP/GNA12/RERG/BCL6/TIAM1/ARHGEF10L/MYO9B	36
BP	GO:0006413	translational initiation	21/442	85/5658	1.37367e-06	2.09138e-05	1.24668e-05	HSPB1/RPS15/RPL18/RPL8/RPS25/TPR/RPS27A/RPL28/RPL10/RPL23A/RPL37/RPLP2/RPS24/RPS6/RPL19/RPS12/RPLP1/RPL12/RPL37A/RPS9/RPL31	21
BP	GO:0071453	cellular response to oxygen levels	21/442	85/5658	1.37367e-06	2.09138e-05	1.24668e-05	MT3/PTN/ENO1/ZFP36L1/FAS/UBB/RPS27A/NDRG1/EGR1/EGLN3/S100B/AQP1/FOXO1/RBPJ/PPARGC1A/HIF1A/HIPK2/UBC/HP1BP3/NAMPT/CFLAR	21
BP	GO:0045807	positive regulation of endocytosis	19/442	72/5658	1.50247e-06	2.27894e-05	1.35848e-05	APOE/CLU/NLGN1/LRP1/TF/CCL2/B2M/CD63/PTPRJ/DNM2/ANGPT1/MYO18A/HIP1R/ITGAV/MERTK/MFGE8/HIP1/APPL2/VPS28	19
CC	GO:0030426	growth cone	17/441	62/5894	1.68135e-06	2.28033e-05	1.47118e-05	HSP90AA1/LRP1/PREX1/NRP1/DNM2/DSCAM/PTBP2/NDRG2/PARD3/ABI1/DICER1/YWHAE/TIAM1/UTRN/IQGAP1/TRAK1/PTCH1	17
BP	GO:0001101	response to acid chemical	29/442	145/5658	1.66454e-06	2.50291e-05	1.49199e-05	FGFR2/GJA1/PDGFRB/PTN/CFL1/CD38/TNC/FYN/DUSP1/SOX9/CD9/ZEB1/GSN/SST/EGR1/AQP1/FOXO1/PPARGC1A/ABCA1/YAP1/ATP2B4/ATM/HNRNPD/PKD2/CTSH/CAPN2/PDGFC/TGFBR3/PTCH1	29
BP	GO:0051402	neuron apoptotic process	23/442	100/5658	1.66861e-06	2.50291e-05	1.49199e-05	APOE/MT3/NR4A3/PTPRZ1/NR4A2/LRP1/CCL2/CNTFR/FYN/NRP1/JUN/PRNP/TGFB2/ANGPT1/EGLN3/PPARGC1A/MEF2C/HIF1A/HIPK2/ATM/HSPA5/STAMBP/TGFB3	23
BP	GO:0051896	regulation of protein kinase B signaling	23/442	100/5658	1.66861e-06	2.50291e-05	1.49199e-05	HSP90AA1/FGFR2/PDGFRB/SEMA5A/TCF7L2/STK3/CHI3L1/FYN/F3/FGF2/GAB1/PTPRJ/FGFR3/FGF1/ANGPT1/TSC2/NRG1/DLG1/HIP1/RICTOR/FGFR1/FRS2/HGF	23
BP	GO:0035023	regulation of Rho protein signal transduction	18/442	66/5658	1.68751e-06	2.51285e-05	1.49791e-05	APOE/STMN1/PDGFRB/PREX2/DLC1/ARHGEF10/AKAP13/PREX1/VAV3/NRP1/KANK1/OPHN1/ABCA1/VAV2/BCL6/TIAM1/ARHGEF10L/MYO9B	18
BP	GO:1901215	negative regulation of neuron death	21/442	86/5658	1.68816e-06	2.51285e-05	1.49791e-05	APOE/MT3/NR4A3/PTPRZ1/NR4A2/SLC7A11/LRP1/CCL2/CNTFR/FYN/NRP1/JUN/STAT3/ANGPT1/SORL1/PPARGC1A/MEF2C/HIF1A/HIPK2/STAMBP/TGFB3	21
BP	GO:0001666	response to hypoxia	30/442	153/5658	1.69886e-06	2.51285e-05	1.49791e-05	MT3/PTN/CD38/NR4A2/ENO1/ZFP36L1/ITPR2/PML/TGFB2/UBB/RPS27A/NDRG1/EGR1/EGLN3/S100B/AQP1/RBPJ/PPARGC1A/HIF1A/HIPK2/UBC/ATM/DDIT4/HP1BP3/TGFB3/BIRC2/CAPN2/ADORA1/TGFBR3/CFLAR	30
BP	GO:0010952	positive regulation of peptidase activity	22/442	93/5658	1.69996e-06	2.51285e-05	1.49791e-05	CCK/DLC1/ANTXR1/MAP3K5/FYN/F3/FN1/PML/FAS/GSN/STAT3/MBP/EGLN3/CRADD/HIP1R/HIP1/ST18/ASPH/CTSH/FBLN1/COL4A3/CFLAR	22
CC	GO:0030427	site of polarized growth	17/441	63/5894	2.14659e-06	2.6853e-05	1.73245e-05	HSP90AA1/LRP1/PREX1/NRP1/DNM2/DSCAM/PTBP2/NDRG2/PARD3/ABI1/DICER1/YWHAE/TIAM1/UTRN/IQGAP1/TRAK1/PTCH1	17
CC	GO:0015934	large ribosomal subunit	12/441	33/5894	2.20783e-06	2.6853e-05	1.73245e-05	RPL18/RPL8/RPL28/RPL10/RPL23A/RPL37/RPLP2/RPL19/RPLP1/RPL12/RPL37A/RPL31	12
CC	GO:0022625	cytosolic large ribosomal subunit	12/441	33/5894	2.20783e-06	2.6853e-05	1.73245e-05	RPL18/RPL8/RPL28/RPL10/RPL23A/RPL37/RPLP2/RPL19/RPLP1/RPL12/RPL37A/RPL31	12
CC	GO:1990904	ribonucleoprotein complex	46/441	304/5894	2.22744e-06	2.6853e-05	1.73245e-05	HSPA1A/MT3/HSPA1B/RPS15/APOD/ZFP36L1/ZFP36/RBPMS/HNRNPA2B1/RPL18/NEAT1/RPL8/RPS25/TUBA1A/DDX5/FUS/HNRNPM/LGALS3/RPS27A/RPL28/RPL10/PTBP2/CSNK1A1/RPL23A/ACTB/RPL37/SF1/RPLP2/PPARGC1A/RPS24/RPS6/DCP1B/DICER1/RPL19/HNRNPD/RPS12/RPLP1/RPL12/IQGAP1/CTSH/RPL37A/RPS9/HSPA8/GHR/PRPF6/RPL31	46
BP	GO:0017015	regulation of transforming growth factor beta receptor signaling pathway	17/442	60/5658	1.83867e-06	2.70804e-05	1.61427e-05	HSPA1A/LDLRAD4/SMURF2/PRDM16/LTBP1/ZEB1/DNM2/UBB/RPS27A/HIPK2/UBC/HSPA5/CHST11/HTRA1/TGFB3/FBN2/TGFBR3	17
BP	GO:0001936	regulation of endothelial cell proliferation	19/442	73/5658	1.8869e-06	2.76904e-05	1.65063e-05	APOE/GJA1/PRKCA/SEMA5A/NR4A1/CCL2/F3/FGF2/SULF1/CDH13/NRP1/JUN/STAT3/MEF2C/HIF1A/PTPRM/STAT1/RICTOR/FGFR1	19
BP	GO:0051668	localization within membrane	15/442	48/5658	1.91497e-06	2.80012e-05	1.66916e-05	APOE/GPC6/PTN/NLGN1/SLC7A11/CDH13/DNM2/GSN/OPHN1/ADAM10/LGI1/NRXN1/DLG1/HIP1/DNM3	15
CC	GO:0043235	receptor complex	34/441	196/5894	2.43194e-06	2.8526e-05	1.84039e-05	FGFR2/TFRC/PDGFRB/GABRB1/NLGN1/ITPR2/BMPR1B/LRP1/BMPR1A/TF/EPHA6/CNTFR/GABRG1/NRP1/B2M/GFRA1/FGFR3/RAMP1/GPR37L1/SORBS1/IL6ST/EPHB1/DDR2/ITGA6/ITGB8/GPRC5B/ITGAV/MERTK/DLG1/IL6R/FGFR1/BIRC2/TGFBR3/GHR	34
BP	GO:0001935	endothelial cell proliferation	20/442	80/5658	2.01195e-06	2.93139e-05	1.74741e-05	APOE/GJA1/PRKCA/SEMA5A/NR4A1/CCL2/F3/FGF2/SULF1/CDH13/NRP1/JUN/STAT3/MEF2C/HIF1A/PTPRM/STAT1/DLG1/RICTOR/FGFR1	20
BP	GO:0048638	regulation of developmental growth	27/442	131/5658	2.08435e-06	3.02603e-05	1.80383e-05	APOE/MT3/FGFR2/GJA1/SEMA5A/STK3/LRP1/BMPR1A/FGF2/NRP1/FN1/SEMA3E/DNM2/DSCAM/FGFR3/STAT3/SYT1/JARID2/RBPJ/YAP1/MEF2C/SH3PXD2B/FGFR1/AR/TGFBR3/PTCH1/GHR	27
BP	GO:2000278	regulation of DNA biosynthetic process	13/442	37/5658	2.11725e-06	3.05486e-05	1.82101e-05	HSP90AA1/GJA1/PDGFRB/HMBOX1/HNRNPA2B1/FGF2/DUSP1/RGN/ATM/DACH1/HNRNPD/NEK7/HGF	13
BP	GO:0099537	trans-synaptic signaling	40/442	238/5658	2.11924e-06	3.05486e-05	1.82101e-05	APOE/PTPRD/GLUL/GABRB1/PTN/CD38/NLGN1/AGT/IL1RAPL1/SLC7A11/PMP22/MINK1/CCL2/FYN/GABRG1/TUBB2B/NLGN4X/SERPINE2/CASK/PRNP/STAT3/SST/SYT1/RAP1B/OPHN1/MBP/FGF12/ADCY8/S100B/EPHB1/LGI1/NRXN1/MEF2C/SLC1A3/ADORA2B/DLG1/IGSF11/NRG3/ADORA1/HSPA8	40
BP	GO:0006886	intracellular protein transport	55/442	375/5658	2.2581e-06	3.24353e-05	1.93348e-05	HSPB1/HSP90AA1/RPS15/APOD/CLU/TCF7L2/NLGN1/AGT/HNRNPA2B1/RPL18/RPL8/TBC1D22A/FYN/ZFYVE16/RPS25/PML/TPR/PRNP/UBB/RPS27A/RPL28/STAT3/RAMP1/RPL10/SRSF6/ANGPT1/RPL23A/SORL1/TSC2/RPL37/PARD3/RPLP2/RPS24/WLS/UBC/RPS6/HSPA5/RPL19/HIP1/APPL2/RPS12/TXNIP/NUP160/VPS28/RPLP1/YWHAE/RPL12/RPL37A/AP3B1/TRAK1/RPS9/ADORA1/ARFGAP3/HSPA8/RPL31	55
BP	GO:0045926	negative regulation of growth	24/442	109/5658	2.28059e-06	3.2643e-05	1.94586e-05	HSPA1A/MT3/HSPA1B/GJA1/SEMA5A/STK3/ENO1/AGT/NRP1/SERPINE2/PML/PTPRJ/SEMA3E/BST2/FGFR3/TGFB2/WFDC1/JARID2/OSGIN2/HIF1A/RERG/EAF2/BCL6/PTCH1	24
CC	GO:0031012	extracellular matrix	43/441	279/5894	2.98951e-06	3.41433e-05	2.2028e-05	APOE/GPC6/FGFR2/CLU/PTPRZ1/PLSCR1/PTN/AGT/TNC/CHI3L1/F3/SULF1/LTBP1/CDH13/GPC5/SERPINE2/FN1/PSAP/CASK/HNRNPM/LAMA1/EFEMP1/LGALS3/TGFB2/HPSE2/FGF1/NCAN/BCAN/ITGA6/ELN/S100A6/MFGE8/DLG1/ADAMTS9/HTRA1/VCAN/TGFB3/SPON1/CTSH/FBN2/TGFBR3/FBLN1/COL4A3	43
BP	GO:0000003	reproduction	67/442	492/5658	2.43925e-06	3.46697e-05	2.06667e-05	FGFR2/GJA1/FOS/PDGFRB/CADM1/ETV6/GABRB1/PTN/CD38/STK3/AGT/TNC/TOB2/ZFP36L1/BMPR1B/SMURF2/BMPR1A/ANTXR1/CNTFR/GLI2/DUSP1/SULF1/ZMIZ1/CTNNA1/NCOR2/SERPINE2/SOX9/PSAP/CD9/DNM2/TGFB2/UBB/SMARCC1/STAT3/EGR1/RGN/SOCS3/OSGIN2/SF1/ADAM10/RBPJ/ITGB8/HIF1A/MERTK/ID4/ATP2B4/RPS6/ATM/MFGE8/DACH1/DLG1/HSPA5/NAMPT/SH3PXD2B/EAF2/BCL6/HTRA1/DIAPH2/TGFB3/FRS2/PKD2/BIRC2/CAPN2/AR/PTCH1/FBLN1/ARID1A	67
BP	GO:0022414	reproductive process	67/442	492/5658	2.43925e-06	3.46697e-05	2.06667e-05	FGFR2/GJA1/FOS/PDGFRB/CADM1/ETV6/GABRB1/PTN/CD38/STK3/AGT/TNC/TOB2/ZFP36L1/BMPR1B/SMURF2/BMPR1A/ANTXR1/CNTFR/GLI2/DUSP1/SULF1/ZMIZ1/CTNNA1/NCOR2/SERPINE2/SOX9/PSAP/CD9/DNM2/TGFB2/UBB/SMARCC1/STAT3/EGR1/RGN/SOCS3/OSGIN2/SF1/ADAM10/RBPJ/ITGB8/HIF1A/MERTK/ID4/ATP2B4/RPS6/ATM/MFGE8/DACH1/DLG1/HSPA5/NAMPT/SH3PXD2B/EAF2/BCL6/HTRA1/DIAPH2/TGFB3/FRS2/PKD2/BIRC2/CAPN2/AR/PTCH1/FBLN1/ARID1A	67
BP	GO:0048545	response to steroid hormone	33/442	180/5658	2.47177e-06	3.50096e-05	2.08693e-05	FOS/NR4A3/GABRB1/PTN/CD38/NR4A2/ZFP36L1/AKAP13/ZFP36/NR4A1/DUSP1/NCOR2/WBP2/DDX5/TGFB2/SST/S100B/NCOA6/AQP1/FOXO1/PPARGC1A/YAP1/TADA3/DDIT4/NR1D1/TXNIP/TGFB3/PRMT2/AR/NCOA2/NR1H2/ARID1A/CFLAR	33
CC	GO:0062023	collagen-containing extracellular matrix	37/441	225/5894	3.2533e-06	3.62034e-05	2.3357e-05	APOE/GPC6/FGFR2/CLU/PTPRZ1/PLSCR1/PTN/AGT/TNC/F3/SULF1/LTBP1/CDH13/GPC5/SERPINE2/FN1/PSAP/CASK/HNRNPM/LAMA1/EFEMP1/LGALS3/TGFB2/ITGA6/ELN/S100A6/MFGE8/DLG1/ADAMTS9/HTRA1/VCAN/TGFB3/SPON1/CTSH/FBN2/FBLN1/COL4A3	37
BP	GO:0044057	regulation of system process	40/442	240/5658	2.63447e-06	3.6928e-05	2.20129e-05	GJA1/PRKCA/NR4A3/CAMK2G/CCK/DOCK4/CD38/NLGN1/ENO1/AGT/ITPR2/PRKG1/NLGN4X/S100A1/TGFB2/FGF12/S100B/PARD3/PLCE1/JARID2/AQP1/FOXO1/HIP1R/IL6ST/PPARGC1A/NRXN1/ATP2B4/ADORA2B/DLG1/DICER1/IGSF11/GNAO1/YWHAE/UTRN/ASPH/FGFR1/SRI/HGF/DOCK5/ADORA1	40
BP	GO:0033993	response to lipid	59/442	416/5658	2.85408e-06	3.98688e-05	2.37659e-05	FGFR2/GJA1/FOS/PRKCA/CLU/NR4A3/PDGFRB/GABRB1/PTN/CD38/NR4A2/AGT/TNC/ZFP36L1/AKAP13/ZFP36/NR4A1/CCL2/JUND/DUSP1/NCOR2/WBP2/SOX9/JUN/DDX5/MSN/TGFB2/STAT3/SST/ADCY8/WFDC1/S100B/NCOA6/AQP1/FOXO1/PPARGC1A/ABCA1/CDC73/YAP1/MEF2C/TADA3/SASH1/ATM/DDIT4/NR1D1/HNRNPD/TXNIP/TGFB3/PRMT2/TAB2/CTSH/CAPN2/AR/NCOA2/TGFBR3/PTCH1/NR1H2/ARID1A/CFLAR	59
BP	GO:0007266	Rho protein signal transduction	23/442	103/5658	2.87753e-06	4.00588e-05	2.38792e-05	APOE/STMN1/PDGFRB/PREX2/DLC1/CFL1/ARHGEF10/AKAP13/PREX1/PHACTR4/CDH13/VAV3/NRP1/KANK1/OPHN1/ARHGAP29/ABCA1/VAV2/GNA12/BCL6/TIAM1/ARHGEF10L/MYO9B	23
BP	GO:0060562	epithelial tube morphogenesis	32/442	173/5658	2.89046e-06	4.01014e-05	2.39045e-05	FGFR2/GJA1/DLC1/CFL1/STK3/AGT/TNC/HES5/FGF2/GLI2/PHACTR4/NRP1/SOX9/PML/SEMA3E/LAMA1/TGFB2/FGF1/TSC2/RBPJ/LHX2/YAP1/MEF2C/HIF1A/SDC4/DLG1/TULP3/PKD2/CTSH/AR/PTCH1/ARID1A	32
BP	GO:0061448	connective tissue development	28/442	141/5658	2.92563e-06	4.04512e-05	2.41131e-05	ID2/PDGFRB/BMPR1B/HES5/BMPR1A/CHI3L1/FGF2/GLI2/SULF1/SOX9/PRRX1/ZEB1/EFEMP1/FGFR3/UBB/EGR1/SORL1/PPARGC1A/ITGB8/MEF2C/HIF1A/ID4/CHST11/NFIB/SH3PXD2B/IL6R/FGFR1/CFLAR	28
BP	GO:1902903	regulation of supramolecular fiber organization	29/442	149/5658	2.97173e-06	4.09494e-05	2.441e-05	HSPA1A/APOE/HSPA1B/TMSB4X/STMN1/CLU/APC/SEMA5A/DLC1/CFL1/ARHGEF10/AKAP13/PREX1/NRP1/GSN/KANK1/WASF2/HIP1R/ID1/ELN/MEF2C/SDC4/DLG1/SH3PXD2B/S1PR1/RICTOR/TGFB3/ARHGEF10L/HSPA8	29
BP	GO:0071774	response to fibroblast growth factor	17/442	62/5658	3.03238e-06	4.1644e-05	2.48241e-05	FGFR2/TNC/ZFP36L1/ZFP36/NR4A1/CCL2/FGF2/SULF1/HNRNPM/FGFR3/FGF1/FGF12/POLR2L/POLR2J/IQGAP1/FGFR1/FRS2	17
BP	GO:0010634	positive regulation of epithelial cell migration	20/442	82/5658	3.04903e-06	4.17317e-05	2.48764e-05	HSPB1/TMSB4X/PRKCA/MAP4K4/SEMA5A/AGT/DOCK1/FGF2/NRP1/SOX9/PIK3C2A/JUN/TGFB2/FGF1/ANGPT1/HIF1A/SASH1/FGFR1/CTSH/DOCK5	20
BP	GO:0034599	cellular response to oxidative stress	26/442	126/5658	3.15719e-06	4.30671e-05	2.56724e-05	HSPA1A/HSPB1/MT3/HSPA1B/FOS/NR4A3/NR4A2/SLC7A11/MAP3K5/FYN/PML/JUN/PSAP/DNM2/GPR37L1/RGN/FUT8/AQP1/FOXO1/PPARGC1A/HIF1A/HNRNPD/PKD2/HGF/CFLAR/PRDX1	26
MF	GO:0035258	steroid hormone receptor binding	14/438	42/5628	1.69151e-06	4.38988e-05	3.11171e-05	NR4A3/NR4A2/NR4A1/NCOR2/WBP2/DDX5/FUS/STAT3/NCOA6/TACC1/PPARGC1A/RERG/PRMT2/PRPF6	14
MF	GO:0031625	ubiquitin protein ligase binding	24/438	108/5628	1.78691e-06	4.42667e-05	3.13779e-05	HSPA1A/HSP90AA1/HSPA1B/CLU/APC/GABARAPL2/ACTG1/TNK2/PML/JUN/UBB/RPS27A/DTX1/UBASH3B/FOXO1/PPARGC1A/HIF1A/UBC/HSPA5/TXNIP/JAK1/YWHAE/TUBA1B/HSPA8	24
BP	GO:0055017	cardiac muscle tissue growth	14/442	44/5658	3.32946e-06	4.5265e-05	2.69826e-05	FGFR2/GJA1/AGT/AKAP13/BMPR1A/FGF2/TGFB2/JARID2/RBPJ/YAP1/MEF2C/S1PR1/FGFR1/TGFBR3	14
BP	GO:0010976	positive regulation of neuron projection development	23/442	104/5658	3.43146e-06	4.64962e-05	2.77165e-05	APOE/PTPRD/SEMA5A/PTN/NLGN1/AGT/IL1RAPL1/LRP1/CUX1/FYN/TUBB2B/NRP1/FN1/DSCAM/SYT1/ITGA6/HSPA5/TIAM1/IQGAP1/FGFR1/TRAK1/HGF/CFLAR	23
BP	GO:0071772	response to BMP	19/442	76/5658	3.63489e-06	4.89265e-05	2.91652e-05	BMPR1B/HES5/SMURF2/BMPR1A/ZFYVE16/SULF1/TOB1/SOX9/ZNF423/DDX5/EGR1/NEO1/SORL1/RBPJ/ID1/HIPK2/HTRA1/CHRDL1/TGFBR3	19
BP	GO:0071773	cellular response to BMP stimulus	19/442	76/5658	3.63489e-06	4.89265e-05	2.91652e-05	BMPR1B/HES5/SMURF2/BMPR1A/ZFYVE16/SULF1/TOB1/SOX9/ZNF423/DDX5/EGR1/NEO1/SORL1/RBPJ/ID1/HIPK2/HTRA1/CHRDL1/TGFBR3	19
BP	GO:1901654	response to ketone	21/442	90/5658	3.71439e-06	4.98316e-05	2.97048e-05	FOS/GABRB1/PTN/CD38/TNC/DUSP1/WBP2/MSN/TGFB2/ADCY8/AQP1/FOXO1/YAP1/DDIT4/HNRNPD/TXNIP/TGFB3/AR/NCOA2/TGFBR3/CFLAR	21
BP	GO:0030111	regulation of Wnt signaling pathway	29/442	151/5658	3.93212e-06	5.25792e-05	3.13426e-05	APOE/FGFR2/APC/SEMA5A/TCF7L2/STK3/LRP1/SMURF2/SULF1/GPC5/SOX9/MCC/WIF1/KANK1/CCNY/EGR1/RNF213/CSNK1A1/TSC2/FOXO1/RBPJ/CDC73/WLS/YAP1/GPRC5B/ZNRF3/WWTR1/TBL1X/TIAM1	29
BP	GO:0007160	cell-matrix adhesion	23/442	105/5658	4.081e-06	5.40721e-05	3.22325e-05	APOD/MAP4K4/DLC1/LIMS1/LRP1/MINK1/CDH13/NRP1/FN1/CD63/CASK/PTPRJ/SEMA3E/SORBS1/DDR2/ITGA6/ITGAV/SDC4/ADAMTS9/BCL6/TIAM1/UTRN/IQGAP1	23
BP	GO:2001234	negative regulation of apoptotic signaling pathway	23/442	105/5658	4.081e-06	5.40721e-05	3.22325e-05	HSPA1A/HSPB1/HSPA1B/CLU/TCF7L2/NR4A2/ENO1/TMBIM1/FYN/PHIP/CTNNA1/NRP1/FAS/LGALS3/ITGA6/SH3RF1/YAP1/HIF1A/ITGAV/IFI6/HGF/AR/CFLAR	23
BP	GO:0034329	cell junction assembly	25/442	120/5658	4.08367e-06	5.40721e-05	3.22325e-05	GJA1/PRKCA/APOD/APC/MAP4K4/DLC1/AGT/LIMS1/LRP1/ACTG1/CTNNA1/CDH13/NRP1/FN1/CD9/PTPRJ/RAP1B/OPHN1/ACTB/PARD3/SORBS1/ITGA6/SDC4/DLG1/IQGAP1	25
BP	GO:0001952	regulation of cell-matrix adhesion	16/442	57/5658	4.24366e-06	5.60081e-05	3.33866e-05	APOD/MAP4K4/DLC1/LIMS1/LRP1/MINK1/CDH13/NRP1/CASK/PTPRJ/SEMA3E/DDR2/SDC4/BCL6/UTRN/IQGAP1	16
BP	GO:0090150	establishment of protein localization to membrane	26/442	128/5658	4.29665e-06	5.65238e-05	3.3694e-05	HSP90AA1/RPS15/RPL18/RPL8/FYN/RPS25/PRNP/RPS27A/RPL28/RPL10/RPL23A/RPL37/PARD3/RPLP2/RPS24/RPS6/HSPA5/RPL19/RPS12/RPLP1/YWHAE/RPL12/RPL37A/RPS9/ADORA1/RPL31	26
BP	GO:0009266	response to temperature stimulus	21/442	91/5658	4.4853e-06	5.8731e-05	3.50097e-05	HSPA1A/HSP90AA1/HSPA1B/FOS/CAMK2G/DNAJB1/SLC27A1/TPR/FGF1/SST/FOXO1/PPARGC1A/EPHB1/ATM/HSPA5/APPL2/NUP160/YWHAE/ST8SIA1/ADORA1/HSPA8	21
BP	GO:0060419	heart growth	14/442	45/5658	4.49332e-06	5.8731e-05	3.50097e-05	FGFR2/GJA1/AGT/AKAP13/BMPR1A/FGF2/TGFB2/JARID2/RBPJ/YAP1/MEF2C/S1PR1/FGFR1/TGFBR3	14
MF	GO:0003712	transcription coregulator activity	38/438	223/5628	2.48692e-06	5.89292e-05	4.17712e-05	HSPA1A/DNAJB1/TOB2/MEIS2/RBPMS/PRDM16/MAML2/JUND/FGF2/TOB1/ZMIZ1/NCOR2/WBP2/PRRX1/PML/JUN/ZEB1/FUS/SMARCC1/DTX1/NCOA6/SF1/PPARGC1A/NRG1/YAP1/TADA3/HIPK2/ID4/WWTR1/TBL1X/NR1D1/KAT2B/PRMT2/BIRC2/NCOA2/NR1H2/PRPF6/ARID1A	38
MF	GO:0016773	phosphotransferase activity, alcohol group as acceptor	41/438	250/5628	2.71559e-06	6.16666e-05	4.37115e-05	FGFR2/PRKCA/MMD2/CAMK2G/PDGFRB/MAP4K4/STK3/AKAP13/BMPR1B/BMPR1A/MINK1/TAOK3/CCL2/EPHA6/MAP3K5/FYN/TNIK/CCND3/LTBP1/PRKG1/TNK2/NRP1/PIK3C2A/RPS6KA2/CASK/EFEMP1/FGFR3/CSNK1A1/RPS6KA5/MAP3K14/EPHB1/DDR2/KSR1/HIPK2/MERTK/ATM/JAK1/STK10/FGFR1/NEK7/TGFBR3	41
BP	GO:0010770	positive regulation of cell morphogenesis involved in differentiation	17/442	64/5658	4.88308e-06	6.34177e-05	3.78035e-05	PTPRD/SEMA5A/IL1RAPL1/DOCK1/LIMS1/LRP1/CUX1/PREX1/TUBB2B/NRP1/FN1/DNM2/DSCAM/NEDD9/TIAM1/TRAK1/DOCK5	17
BP	GO:1901861	regulation of muscle tissue development	17/442	64/5658	4.88308e-06	6.34177e-05	3.78035e-05	FGFR2/GJA1/BMPR1A/FGF2/DDX5/S100B/JARID2/RBPJ/PPARGC1A/EPHB1/NRG1/YAP1/MEF2C/MEGF10/FGFR1/FRS2/TGFBR3	17
BP	GO:0043281	regulation of cysteine-type endopeptidase activity involved in apoptotic process	22/442	99/5658	5.15854e-06	6.67817e-05	3.98087e-05	MT3/CCK/DLC1/MAP3K5/F3/PML/FAS/GSN/EGLN3/CRADD/AQP1/HIP1R/SH3RF1/HIP1/ST18/YWHAE/IFI6/CTSH/BIRC2/HGF/COL4A3/CFLAR	22
BP	GO:0007162	negative regulation of cell adhesion	28/442	145/5658	5.18486e-06	6.69093e-05	3.98848e-05	APOD/MAP4K4/SEMA5A/DLC1/TNC/LRP1/DUSP1/PRKG1/CDH13/DAB1/SERPINE2/CD9/CASK/SEMA3E/PRNP/DSCAM/LGALS3/KANK1/DTX1/ANGPT1/MBP/UBASH3B/ADAM10/SDC4/DLG1/BCL6/ADAMTS18/FBLN1	28
BP	GO:0010563	negative regulation of phosphorus metabolic process	38/442	229/5658	5.28275e-06	6.77425e-05	4.03815e-05	APOE/HSPB1/APC/PEBP1/LDLRAD4/PTN/GADD45B/TAOK3/DUSP1/JUN/SLC27A1/ITCH/PTPRJ/PRNP/LGALS3/TGFB2/STAT3/ANGPT1/UBASH3B/SORL1/TSC2/NDRG2/PARD3/RGN/SOCS3/FOXO1/PTPRT/PPARGC1A/CAMK2N1/WWTR1/DDIT4/DLG1/YWHAE/PPP2R5A/KAT2B/IQGAP1/HGF/FBLN1	38
BP	GO:0045936	negative regulation of phosphate metabolic process	38/442	229/5658	5.28275e-06	6.77425e-05	4.03815e-05	APOE/HSPB1/APC/PEBP1/LDLRAD4/PTN/GADD45B/TAOK3/DUSP1/JUN/SLC27A1/ITCH/PTPRJ/PRNP/LGALS3/TGFB2/STAT3/ANGPT1/UBASH3B/SORL1/TSC2/NDRG2/PARD3/RGN/SOCS3/FOXO1/PTPRT/PPARGC1A/CAMK2N1/WWTR1/DDIT4/DLG1/YWHAE/PPP2R5A/KAT2B/IQGAP1/HGF/FBLN1	38
BP	GO:0030509	BMP signaling pathway	18/442	71/5658	5.30092e-06	6.77618e-05	4.0393e-05	BMPR1B/HES5/SMURF2/BMPR1A/ZFYVE16/SULF1/TOB1/ZNF423/DDX5/EGR1/NEO1/SORL1/RBPJ/ID1/HIPK2/HTRA1/CHRDL1/TGFBR3	18
BP	GO:0030308	negative regulation of cell growth	19/442	78/5658	5.50628e-06	7.01662e-05	4.18263e-05	HSPA1A/MT3/HSPA1B/GJA1/SEMA5A/ENO1/AGT/NRP1/SERPINE2/PML/PTPRJ/SEMA3E/BST2/TGFB2/WFDC1/OSGIN2/RERG/EAF2/BCL6	19
BP	GO:0070741	response to interleukin-6	10/442	24/5658	5.52464e-06	7.01801e-05	4.18346e-05	CHI3L1/STAT3/SOCS3/PTPRT/IL6ST/PPARGC1A/STAT1/IL6R/JAK1/ST18	10
BP	GO:0014910	regulation of smooth muscle cell migration	13/442	40/5658	5.75087e-06	7.28265e-05	4.34121e-05	NR4A3/PDGFRB/DOCK4/AGT/LRP1/BMPR1A/PRKG1/NRP1/SORL1/PPARGC1A/MEF2C/IQGAP1/DOCK5	13
BP	GO:0051098	regulation of binding	30/442	162/5658	5.80847e-06	7.33274e-05	4.37107e-05	APOE/ID2/TMSB4X/STMN1/TCF7L2/STK3/HMBOX1/LRP1/NRP1/B2M/JUN/LGALS3/ANGPT1/CSNK1A1/UBASH3B/ACTB/SORL1/HIP1R/LHX2/ID1/NRG1/MEF2C/HIPK2/ID4/ZBTB7C/HSPA5/TIAM1/SPON1/SRI/TGFBR3	30
BP	GO:0050773	regulation of dendrite development	15/442	52/5658	5.85952e-06	7.37428e-05	4.39583e-05	APOE/PTPRD/PTN/CFL1/NLGN1/IL1RAPL1/CUX1/TNIK/PREX1/ADAM10/ID1/MEF2C/DNM3/TIAM1/IQGAP1	15
BP	GO:0032872	regulation of stress-activated MAPK cascade	22/442	100/5658	6.14287e-06	7.70703e-05	4.59418e-05	MAP4K4/STK3/GADD45B/MINK1/TAOK3/MAP3K5/TNIK/DUSP1/ITCH/FAS/TGFB2/SPAG9/FOXO1/EPHB1/SH3RF1/SASH1/HIPK2/DLG1/TPD52L1/TIAM1/HGF/PRDX1	22
BP	GO:0043393	regulation of protein binding	21/442	93/5658	6.47744e-06	8.10179e-05	4.8295e-05	APOE/STMN1/TCF7L2/STK3/LRP1/NRP1/B2M/LGALS3/ANGPT1/UBASH3B/ACTB/SORL1/HIP1R/ID1/NRG1/MEF2C/HIPK2/HSPA5/TIAM1/SPON1/TGFBR3	21
BP	GO:0018193	peptidyl-amino acid modification	60/442	437/5658	6.78032e-06	8.4546e-05	5.03981e-05	HSP90AA1/FGFR2/PRKCA/PDGFRB/CCK/AGT/HES5/PRDM16/CHI3L1/EPHA6/PPIA/FYN/ZMIZ1/PRKG1/TNK2/NRP1/WBP2/TPR/PTPRJ/PRNP/EFEMP1/FGFR3/STAT3/EGR1/ANGPT1/CSNK1A1/EGLN3/RPS6KA5/PARD3/JARID2/SOCS3/FUT8/ABI1/IL6ST/PPARGC1A/EPHB1/DDR2/NRG1/GPRC5B/TADA3/HIPK2/NEDD9/MERTK/ATP2B4/ATM/DDIT4/IL6R/JAK1/NUP160/RICTOR/ASPH/KAT2B/IQGAP1/FGFR1/PRMT2/MORC3/PDGFC/HGF/ADORA1/GHR	60
BP	GO:0044344	cellular response to fibroblast growth factor stimulus	16/442	59/5658	6.94529e-06	8.63383e-05	5.14665e-05	FGFR2/ZFP36L1/ZFP36/NR4A1/CCL2/FGF2/SULF1/HNRNPM/FGFR3/FGF1/FGF12/POLR2L/POLR2J/IQGAP1/FGFR1/FRS2	16
BP	GO:0007268	chemical synaptic transmission	38/442	232/5658	7.25458e-06	8.96348e-05	5.34316e-05	APOE/GLUL/GABRB1/PTN/CD38/NLGN1/AGT/SLC7A11/PMP22/MINK1/CCL2/FYN/GABRG1/TUBB2B/NLGN4X/SERPINE2/CASK/PRNP/STAT3/SST/SYT1/RAP1B/OPHN1/MBP/FGF12/ADCY8/S100B/EPHB1/LGI1/NRXN1/MEF2C/SLC1A3/ADORA2B/DLG1/IGSF11/NRG3/ADORA1/HSPA8	38
BP	GO:0098916	anterograde trans-synaptic signaling	38/442	232/5658	7.25458e-06	8.96348e-05	5.34316e-05	APOE/GLUL/GABRB1/PTN/CD38/NLGN1/AGT/SLC7A11/PMP22/MINK1/CCL2/FYN/GABRG1/TUBB2B/NLGN4X/SERPINE2/CASK/PRNP/STAT3/SST/SYT1/RAP1B/OPHN1/MBP/FGF12/ADCY8/S100B/EPHB1/LGI1/NRXN1/MEF2C/SLC1A3/ADORA2B/DLG1/IGSF11/NRG3/ADORA1/HSPA8	38
BP	GO:0070302	regulation of stress-activated protein kinase signaling cascade	22/442	101/5658	7.29472e-06	8.98577e-05	5.35644e-05	MAP4K4/STK3/GADD45B/MINK1/TAOK3/MAP3K5/TNIK/DUSP1/ITCH/FAS/TGFB2/SPAG9/FOXO1/EPHB1/SH3RF1/SASH1/HIPK2/DLG1/TPD52L1/TIAM1/HGF/PRDX1	22
MF	GO:0019199	transmembrane receptor protein kinase activity	14/438	45/5628	4.29458e-06	9.0021e-05	6.38102e-05	FGFR2/PDGFRB/BMPR1B/BMPR1A/EPHA6/LTBP1/NRP1/EFEMP1/FGFR3/EPHB1/DDR2/MERTK/FGFR1/TGFBR3	14
MF	GO:0016301	kinase activity	42/438	264/5628	4.56895e-06	9.22251e-05	6.53725e-05	FGFR2/PRKCA/MMD2/CAMK2G/PDGFRB/MAP4K4/STK3/AKAP13/BMPR1B/BMPR1A/MINK1/TAOK3/CCL2/EPHA6/MAP3K5/FYN/TNIK/CCND3/LTBP1/PRKG1/TNK2/NRP1/PIK3C2A/RPS6KA2/CASK/EFEMP1/FGFR3/CSNK1A1/RPS6KA5/MAP3K14/EPHB1/DDR2/KSR1/HIPK2/MERTK/ATM/DLG1/JAK1/STK10/FGFR1/NEK7/TGFBR3	42
BP	GO:0002431	Fc receptor mediated stimulatory signaling pathway	14/442	47/5658	7.95194e-06	9.76575e-05	5.82139e-05	HSP90AA1/NR4A3/PLSCR1/DOCK1/ACTG1/FYN/VAV3/PTPRJ/MYO10/WASF2/ACTB/ABI1/VAV2/APPL2	14
BP	GO:0036294	cellular response to decreased oxygen levels	19/442	80/5658	8.20681e-06	0.000100484	5.98988e-05	MT3/PTN/ENO1/ZFP36L1/UBB/RPS27A/NDRG1/EGR1/EGLN3/S100B/AQP1/RBPJ/PPARGC1A/HIF1A/HIPK2/UBC/HP1BP3/NAMPT/CFLAR	19
BP	GO:0001503	ossification	34/442	199/5658	8.81408e-06	0.000107595	6.41378e-05	ID2/FGFR2/GJA1/RPS15/PTN/TNC/TOB2/BMPR1B/BMPR1A/JUND/GLI2/TOB1/SOX9/DDX5/FGFR3/TGFB2/INTU/RBPJ/IL6ST/DDR2/ID1/MEF2C/HIF1A/ID4/WWTR1/SH3PXD2B/IL6R/S1PR1/VCAN/TGFB3/CHRDL1/FBN2/HGF/PTCH1	34
BP	GO:0009792	embryo development ending in birth or egg hatching	43/442	279/5658	8.94106e-06	0.000108615	6.47458e-05	FGFR2/GJA1/DLC1/CFL1/MYO1E/STK3/ZFP36L1/HES5/BMPR1A/GLI2/SULF1/PHACTR4/ZMIZ1/SOX9/PRRX1/ZEB1/TGFB2/TET1/INTU/ANGPT1/TSC2/SOCS3/FUT8/ADAM10/RBPJ/ABI1/LHX2/MEF2C/HIF1A/SDC4/ATM/DLG1/CHST11/GNA12/RICTOR/TGFB3/FGFR1/TULP3/PKD2/CAPN2/AR/PTCH1/ARID1A	43
BP	GO:0031346	positive regulation of cell projection organization	28/442	149/5658	8.95107e-06	0.000108615	6.47458e-05	APOE/PTPRD/APC/SEMA5A/PTN/NLGN1/AGT/IL1RAPL1/LRP1/CUX1/FYN/TUBB2B/NRP1/FN1/DNM2/DSCAM/SYT1/WASF2/ITGA6/HSPA5/DNM3/TIAM1/TGFB3/IQGAP1/FGFR1/TRAK1/HGF/CFLAR	28
BP	GO:0051726	regulation of cell cycle	58/442	422/5658	9.52795e-06	0.000114929	6.85096e-05	HSPA1A/HSP90AA1/HSPA1B/ID2/FGFR2/PRKCA/NR4A3/APC/PDGFRB/TCF7L2/ZFP36L1/GADD45B/MEIS2/NR4A1/TAOK3/CCL2/JUND/CCND3/DUSP1/PHIP/PHACTR4/WDR6/TUBA1A/SOX9/PML/JUN/RPS6KA2/TPR/PRNP/TGFB2/CCNY/STAT3/ACTB/TSC2/CRADD/CDC73/ID1/CAMK2N1/HIPK2/ID4/ATP2B4/RPS6/ATM/DACH1/DLG1/CGRRF1/BCL6/YWHAE/PGGT1B/KAT2B/IQGAP1/FGFR1/PKD2/PRMT2/NEK7/BIRC2/PTCH1/MYO16	58
BP	GO:0050918	positive chemotaxis	12/442	36/5658	9.84876e-06	0.000118447	7.06068e-05	SEMA5A/LRP1/F3/FGF2/CDH13/NRP1/PTPRJ/LGALS3/ANGPT1/TSC2/S1PR1/HGF	12
BP	GO:0030168	platelet activation	19/442	81/5658	9.96127e-06	0.000119049	7.09656e-05	APOE/HSPB1/PRKCA/GNA14/PLSCR1/SLC7A11/ITPR2/ACTG1/FYN/PRKG1/VAV3/SERPINE2/CD9/UBASH3B/ACTB/MERTK/VAV2/GNA12/ADAMTS18	19
BP	GO:0071248	cellular response to metal ion	19/442	81/5658	9.96127e-06	0.000119049	7.09656e-05	MT3/ID2/FOS/NLGN1/TF/JUND/B2M/JUN/FUS/GSN/PRNP/SYT1/ADCY8/AQP1/PPARGC1A/MEF2C/HSPA5/IQGAP1/PKD2	19
BP	GO:0050804	modulation of chemical synaptic transmission	29/442	158/5658	9.98667e-06	0.000119049	7.09656e-05	APOE/GLUL/PTN/CD38/NLGN1/AGT/SLC7A11/CCL2/FYN/TUBB2B/NLGN4X/SERPINE2/CASK/PRNP/STAT3/SYT1/RAP1B/OPHN1/ADCY8/S100B/EPHB1/LGI1/NRXN1/MEF2C/SLC1A3/ADORA2B/IGSF11/NRG3/ADORA1	29
BP	GO:1901565	organonitrogen compound catabolic process	58/442	424/5658	1.10422e-05	0.000131046	7.8117e-05	HSPA1A/APOE/HSP90AA1/GPC6/HSPA1B/GJA1/CLU/GLUL/APC/GABARAPL2/LRP1/SMURF2/FYN/SAT1/FGF2/GPC5/SERPINE2/SOX9/PML/PSAP/ITCH/PDE1A/MSN/IL33/UBB/TET1/SMARCC1/RPS27A/HPSE2/RNF213/OPHN1/CSNK1A1/SORL1/NCAN/RGN/BCAN/FOXO1/NRG1/HIPK2/ZNRF3/UBC/WWTR1/ATP2B4/SDC4/ATM/TBL1X/HSPA5/NR1D1/GNA12/UBAP1/ADAMTS9/VPS28/VCAN/CTSH/ACER3/BIRC2/CAPN2/HSPA8	58
BP	GO:0035107	appendage morphogenesis	16/442	61/5658	1.10898e-05	0.000131046	7.8117e-05	FGFR2/GJA1/BMPR1B/BMPR1A/GLI2/SOX9/PRRX1/TGFB2/INTU/CHST11/GNA12/ASPH/FGFR1/TULP3/FBN2/PTCH1	16
BP	GO:0035108	limb morphogenesis	16/442	61/5658	1.10898e-05	0.000131046	7.8117e-05	FGFR2/GJA1/BMPR1B/BMPR1A/GLI2/SOX9/PRRX1/TGFB2/INTU/CHST11/GNA12/ASPH/FGFR1/TULP3/FBN2/PTCH1	16
BP	GO:0060537	muscle tissue development	32/442	184/5658	1.11809e-05	0.00013174	7.85307e-05	ID2/FGFR2/GJA1/FOS/PDGFRB/AGT/AKAP13/BMPR1A/FGF2/SOX9/DDX5/TGFB2/EGR1/S100B/JARID2/RBPJ/PPARGC1A/EPHB1/NRG1/YAP1/ELN/MEF2C/DLG1/ADAMTS9/S1PR1/MEGF10/FGFR1/FRS2/PKD2/TGFBR3/ARID1A/CFLAR	32
BP	GO:0099177	regulation of trans-synaptic signaling	29/442	159/5658	1.13429e-05	0.000133262	7.94381e-05	APOE/GLUL/PTN/CD38/NLGN1/AGT/SLC7A11/CCL2/FYN/TUBB2B/NLGN4X/SERPINE2/CASK/PRNP/STAT3/SYT1/RAP1B/OPHN1/ADCY8/S100B/EPHB1/LGI1/NRXN1/MEF2C/SLC1A3/ADORA2B/IGSF11/NRG3/ADORA1	29
BP	GO:0032956	regulation of actin cytoskeleton organization	28/442	151/5658	1.16517e-05	0.000136496	8.13657e-05	TMSB4X/STMN1/PDGFRB/SEMA5A/DLC1/CFL1/ARHGEF10/AKAP13/LRP1/PREX1/NRP1/SEMA3E/GSN/BST2/KANK1/WASF2/HIP1R/ID1/ELN/MEF2C/SDC4/DLG1/SH3PXD2B/S1PR1/ARHGAP17/RICTOR/TGFB3/ARHGEF10L	28
BP	GO:0045834	positive regulation of lipid metabolic process	17/442	68/5658	1.18665e-05	0.000138613	8.26277e-05	APOE/NR4A3/PDGFRB/AGT/FGF2/VAV3/SLC27A1/FGFR3/FGF1/RGN/SORBS1/PPARGC1A/VAV2/NR1D1/CAPN2/ADORA1/NR1H2	17
BP	GO:0031345	negative regulation of cell projection organization	19/442	82/5658	1.20459e-05	0.000140306	8.36365e-05	APOE/MT3/MAP4K4/SEMA5A/CD38/NLGN1/LRP1/PMP22/FYN/DAB1/NRP1/B2M/SEMA3E/DNM2/PRNP/KANK1/PTPRG/ID1/DNM3	19
CC	GO:0045121	membrane raft	29/441	167/5894	1.33676e-05	0.000145039	9.35734e-05	GJA1/PLSCR1/DLC1/SMURF2/BMPR1A/FYN/SULF1/CTNNA1/CDH13/TUBA1A/FAS/PRNP/BST2/ANGPT1/ADCY8/PPP2R1B/SORBS1/EPHB1/ABCA1/ATP2B4/SDC4/DLG1/S1PR1/IQGAP1/TUBA1B/BIRC2/CAPN2/PTCH1/CFLAR	29
BP	GO:0030323	respiratory tube development	21/442	97/5658	1.30248e-05	0.000151274	9.01749e-05	FGFR2/PDGFRB/PTN/TNC/SLC7A11/BMPR1A/CHI3L1/GLI2/SOX9/LAMA1/FGF1/SRSF6/RBPJ/ID1/YAP1/NFIB/TGFB3/FGFR1/TULP3/TNS3/CTSH	21
BP	GO:0042176	regulation of protein catabolic process	28/442	152/5658	1.32638e-05	0.00015361	9.15676e-05	HSPA1A/APOE/HSP90AA1/HSPA1B/GJA1/CLU/APC/GABARAPL2/LRP1/SMURF2/FYN/SERPINE2/SOX9/PML/ITCH/MSN/IL33/UBB/SMARCC1/OPHN1/CSNK1A1/SORL1/RGN/FOXO1/NRG1/HIPK2/GNA12/VPS28	28
BP	GO:0031400	negative regulation of protein modification process	39/442	247/5658	1.34202e-05	0.000154981	9.23844e-05	HSPA1A/APOE/HSPB1/HSPA1B/APC/PEBP1/LDLRAD4/PTN/GADD45B/TAOK3/FYN/DUSP1/JUN/ITCH/PTPRJ/PRNP/LGALS3/ANGPT1/UBASH3B/SORL1/TSC2/NDRG2/PARD3/RGN/JARID2/SOCS3/FOXO1/PTPRT/PPARGC1A/CAMK2N1/WWTR1/ATP2B4/DDIT4/DLG1/VPS28/YWHAE/KAT2B/HGF/FBLN1	39
CC	GO:0098857	membrane microdomain	29/441	168/5894	1.50526e-05	0.000159338	0.000102799	GJA1/PLSCR1/DLC1/SMURF2/BMPR1A/FYN/SULF1/CTNNA1/CDH13/TUBA1A/FAS/PRNP/BST2/ANGPT1/ADCY8/PPP2R1B/SORBS1/EPHB1/ABCA1/ATP2B4/SDC4/DLG1/S1PR1/IQGAP1/TUBA1B/BIRC2/CAPN2/PTCH1/CFLAR	29
BP	GO:0016202	regulation of striated muscle tissue development	16/442	62/5658	1.38923e-05	0.000159978	9.53636e-05	FGFR2/GJA1/BMPR1A/FGF2/DDX5/S100B/JARID2/RBPJ/EPHB1/NRG1/YAP1/MEF2C/MEGF10/FGFR1/FRS2/TGFBR3	16
BP	GO:0014909	smooth muscle cell migration	13/442	43/5658	1.40601e-05	0.000161453	9.62424e-05	NR4A3/PDGFRB/DOCK4/AGT/LRP1/BMPR1A/PRKG1/NRP1/SORL1/PPARGC1A/MEF2C/IQGAP1/DOCK5	13
BP	GO:0071383	cellular response to steroid hormone stimulus	22/442	105/5658	1.41254e-05	0.000161746	9.6417e-05	NR4A3/NR4A2/ZFP36L1/AKAP13/ZFP36/NR4A1/NCOR2/WBP2/DDX5/NCOA6/AQP1/FOXO1/PPARGC1A/YAP1/TADA3/DDIT4/NR1D1/PRMT2/AR/NR1H2/ARID1A/CFLAR	22
BP	GO:0016331	morphogenesis of embryonic epithelium	18/442	76/5658	1.48023e-05	0.00016902	0.000100753	FGFR2/DLC1/CFL1/STK3/HES5/GLI2/SULF1/PHACTR4/SOX9/TGFB2/TSC2/LHX2/HIF1A/SDC4/TULP3/AR/PTCH1/ARID1A	18
BP	GO:0033043	regulation of organelle organization	60/442	448/5658	1.4981e-05	0.000170257	0.00010149	HSPA1A/HSPA1B/TMSB4X/STMN1/CLU/PTPRD/APC/PDGFRB/SEMA5A/DLC1/CFL1/ARHGEF10/HMBOX1/AKAP13/LRP1/HNRNPA2B1/PREX1/DUSP1/PHIP/NRP1/WBP2/PML/TPR/SEMA3E/DNM2/GSN/MSN/BST2/TET1/KANK1/SYT1/WASF2/TSC2/RPS6KA5/JARID2/HIP1R/PPARGC1A/NRXN1/ID1/ELN/MEF2C/TADA3/HIF1A/SDC4/ATM/DLG1/HNRNPD/SH3PXD2B/S1PR1/BCL6/ARHGAP17/YWHAE/RICTOR/KAT2B/STAT2/TGFB3/ARHGEF10L/NEK7/CAPN2/HGF	60
BP	GO:0031329	regulation of cellular catabolic process	47/442	322/5658	1.49943e-05	0.000170257	0.00010149	HSPA1A/APOE/HSPB1/HSP90AA1/MT3/HSPA1B/PRKCA/CLU/ZFP36L1/GABARAPL2/LRP1/ZFP36/TOB1/WDR6/PML/PSAP/TPR/ITCH/MSN/HNRNPM/IL33/UBB/SMARCC1/RPS27A/STAT3/OPHN1/CSNK1A1/SORL1/TSC2/RGN/FOXO1/PPARGC1A/HIF1A/HIPK2/ATP6V0E1/UBC/ATP2B4/ATM/DDIT4/HNRNPD/GNA12/NAMPT/NUP160/TAB2/EPM2A/HGF/HSPA8	47
BP	GO:0070372	regulation of ERK1 and ERK2 cascade	26/442	137/5658	1.56533e-05	0.000177245	0.000105656	APOE/MT3/FGFR2/PRKCA/PDGFRB/LRP1/CHI3L1/CCL2/FGF2/DUSP1/NRP1/FN1/JUN/FGFR3/RAP1B/ANGPT1/NDRG2/EPHB1/CAMK2N1/DLG1/TIAM1/FRS2/PDGFC/FBLN1/DDT/CFLAR	26
BP	GO:0060038	cardiac muscle cell proliferation	11/442	32/5658	1.66734e-05	0.000188271	0.000112229	FGFR2/GJA1/BMPR1A/FGF2/TGFB2/JARID2/RBPJ/YAP1/MEF2C/FGFR1/TGFBR3	11
BP	GO:0048634	regulation of muscle organ development	16/442	63/5658	1.73079e-05	0.000194894	0.000116177	FGFR2/GJA1/BMPR1A/FGF2/DDX5/S100B/JARID2/RBPJ/EPHB1/NRG1/YAP1/MEF2C/MEGF10/FGFR1/FRS2/TGFBR3	16
BP	GO:1904018	positive regulation of vasculature development	23/442	114/5658	1.73614e-05	0.000194956	0.000116214	HSPB1/PRKCA/SEMA5A/CHI3L1/F3/FGF2/NRP1/PIK3C2A/S100A1/GAB1/STAT3/FGF1/EGR1/AQP1/ITGB8/HIF1A/SASH1/HIPK2/IL6R/JAK1/CTSH/HGF/CFLAR	23
BP	GO:0014812	muscle cell migration	14/442	50/5658	1.75459e-05	0.000196485	0.000117125	NR4A3/PDGFRB/DOCK4/AGT/LRP1/BMPR1A/PRKG1/NRP1/SORL1/PPARGC1A/MEF2C/MEGF10/IQGAP1/DOCK5	14
BP	GO:0032970	regulation of actin filament-based process	30/442	171/5658	1.77357e-05	0.000198064	0.000118067	TMSB4X/STMN1/PDGFRB/SEMA5A/DLC1/CFL1/ARHGEF10/AKAP13/LRP1/PREX1/NRP1/SEMA3E/GSN/BST2/KANK1/WASF2/HIP1R/ID1/ELN/MEF2C/SDC4/DLG1/SH3PXD2B/S1PR1/ARHGAP17/RICTOR/TGFB3/ARHGEF10L/SRI/ADORA1	30
BP	GO:0042552	myelination	18/442	77/5658	1.79505e-05	0.000198863	0.000118543	CLU/PTPRZ1/PTN/ARHGEF10/HES5/PMP22/PSAP/CD9/NDRG1/MBP/S100B/PARD3/NRG1/ID4/DLG1/DICER1/ACER3/HGF	18
BP	GO:0071456	cellular response to hypoxia	18/442	77/5658	1.79505e-05	0.000198863	0.000118543	MT3/PTN/ENO1/ZFP36L1/UBB/RPS27A/NDRG1/EGR1/EGLN3/S100B/AQP1/RBPJ/PPARGC1A/HIF1A/HIPK2/UBC/HP1BP3/CFLAR	18
BP	GO:0071897	DNA biosynthetic process	17/442	70/5658	1.79602e-05	0.000198863	0.000118543	HSP90AA1/GJA1/PDGFRB/HMBOX1/HNRNPA2B1/PPIA/FGF2/DUSP1/UBB/RPS27A/RGN/UBC/ATM/DACH1/HNRNPD/NEK7/HGF	17
BP	GO:0010001	glial cell differentiation	25/442	130/5658	1.80029e-05	0.000198863	0.000118543	MT3/ID2/CLU/PTPRZ1/PTN/ARHGEF10/HES5/LRP1/DAB1/SERPINE2/SOX9/CD9/GSN/NDRG1/DTX1/STAT3/GPR37L1/S100B/PARD3/IL6ST/NRG1/ID4/DICER1/NR1D1/NFIB	25
BP	GO:0043009	chordate embryonic development	42/442	278/5658	1.88725e-05	0.000207905	0.000123932	FGFR2/GJA1/DLC1/CFL1/MYO1E/STK3/ZFP36L1/HES5/BMPR1A/GLI2/SULF1/PHACTR4/ZMIZ1/SOX9/PRRX1/ZEB1/TGFB2/TET1/INTU/ANGPT1/TSC2/SOCS3/FUT8/ADAM10/RBPJ/ABI1/LHX2/MEF2C/HIF1A/SDC4/ATM/DLG1/CHST11/GNA12/TGFB3/FGFR1/TULP3/PKD2/CAPN2/AR/PTCH1/ARID1A	42
CC	GO:0019898	extrinsic component of membrane	23/441	120/5894	2.0874e-05	0.000210446	0.000135771	GNA14/APC/TF/CNTFR/FYN/CTNNA1/CDH13/RGS6/SERPINE2/PIK3C2A/PML/TPR/GFRA1/PRNP/GNG7/SOCS3/S100A6/MFGE8/HIP1/GNAO1/GNA12/TIAM1/IQGAP1	23
CC	GO:0098552	side of membrane	38/441	253/5894	2.12266e-05	0.000210446	0.000135771	GNA14/TFRC/NLGN1/BMPR1A/ANTXR1/TF/CNTFR/MAP3K5/FYN/F3/CDH13/SERPINE2/B2M/CD9/GFRA1/PRNP/GNG7/IL6ST/ITGA6/ABCA1/ITGAV/S100A6/MFGE8/DLG1/HIP1/GNAO1/GNA12/IL6R/S1PR1/TIAM1/IQGAP1/PKD2/BIRC2/CAPN2/TGFBR3/HSPA8/GHR/HLA-E	38
CC	GO:0098589	membrane region	29/441	171/5894	2.13355e-05	0.000210446	0.000135771	GJA1/PLSCR1/DLC1/SMURF2/BMPR1A/FYN/SULF1/CTNNA1/CDH13/TUBA1A/FAS/PRNP/BST2/ANGPT1/ADCY8/PPP2R1B/SORBS1/EPHB1/ABCA1/ATP2B4/SDC4/DLG1/S1PR1/IQGAP1/TUBA1B/BIRC2/CAPN2/PTCH1/CFLAR	29
BP	GO:0060043	regulation of cardiac muscle cell proliferation	10/442	27/5658	1.91766e-05	0.000210683	0.000125589	FGFR2/GJA1/BMPR1A/FGF2/JARID2/RBPJ/YAP1/MEF2C/FGFR1/TGFBR3	10
BP	GO:0002683	negative regulation of immune system process	35/442	215/5658	1.93559e-05	0.00021208	0.000126421	ID2/APOD/TOB2/ZFP36L1/MEIS2/HES5/ZFP36/CCL2/DUSP1/SOX9/ITCH/PTPRJ/PRNP/BST2/LGALS3/TGFB2/IL33/DTX1/ANGPT1/UBASH3B/SEC14L1/CDC73/MERTK/SDC4/ATM/DLG1/NR1D1/C5/BCL6/HTRA1/TGFB3/ADORA1/DDT/NR1H2/HLA-E	35
MF	GO:0042803	protein homodimerization activity	48/438	329/5628	1.0996e-05	0.000214029	0.000151711	APOE/HSPB1/HSP90AA1/FGFR2/TFRC/NR4A3/CAMK2G/CADM1/NR4A2/ENO1/BMPR1A/RBPMS/MAP3K5/TBC1D22A/NLGN4X/CDH13/B2M/S100A1/PML/JUN/SLC27A1/PSAP/TPR/BST2/TGFB2/STAT3/TSC2/ADCY8/S100B/ADAM10/PTPRT/HIP1R/IL6ST/ID1/S100A6/WWTR1/STAT1/HIP1/APPL2/NAMPT/TPD52L1/IL6R/STK10/FGFR1/PKD2/PRMT2/PDGFC/GHR	48
BP	GO:0043010	camera-type eye development	27/442	147/5658	2.00244e-05	0.000218229	0.000130087	GJA1/PDGFRB/PTN/SLC7A11/BMPR1B/HES5/PHACTR4/NRP1/SOX9/JUN/ZEB1/LAMA1/EFEMP1/DSCAM/TGFB2/EPHB1/LHX2/HIF1A/HIPK2/MERTK/PTPRM/ATP2B4/DLG1/TULP3/FRS2/FBN2/ARID1A	27
BP	GO:0048511	rhythmic process	23/442	115/5658	2.01572e-05	0.000219088	0.000130599	ID2/GABRB1/PTN/NLGN1/BMPR1B/JUND/NCOR2/PML/JUN/DDX5/TGFB2/EGR1/PPARGC1A/ID1/ID4/HSPA5/NR1D1/HNRNPD/NAMPT/KAT2B/TGFB3/NCOA2/ADORA1	23
BP	GO:0009895	negative regulation of catabolic process	24/442	123/5658	2.05775e-05	0.000223061	0.000132967	MT3/GABARAPL2/ZFP36/FYN/TOB1/WDR6/SERPINE2/PML/SMARCC1/STAT3/OPHN1/SORL1/TSC2/RGN/PPARGC1A/NRG1/HIPK2/ATP2B4/DDIT4/HNRNPD/NAMPT/TAB2/HGF/ADORA1	24
BP	GO:0030099	myeloid cell differentiation	31/442	181/5658	2.10907e-05	0.000228015	0.00013592	HSPA1A/HSPA1B/ID2/FOS/PRKCA/TFRC/NR4A3/TOB2/ZFP36L1/MEIS2/ZFP36/GAB2/B2M/PML/JUN/LGALS3/STAT3/WASF2/UBASH3B/NCOA6/RBPJ/ABI1/CDC73/MEF2C/HIF1A/HIPK2/RPS6/STAT1/BCL6/KAT2B/TGFBR3	31
BP	GO:0007272	ensheathment of neurons	18/442	78/5658	2.16837e-05	0.000233186	0.000139003	CLU/PTPRZ1/PTN/ARHGEF10/HES5/PMP22/PSAP/CD9/NDRG1/MBP/S100B/PARD3/NRG1/ID4/DLG1/DICER1/ACER3/HGF	18
BP	GO:0008366	axon ensheathment	18/442	78/5658	2.16837e-05	0.000233186	0.000139003	CLU/PTPRZ1/PTN/ARHGEF10/HES5/PMP22/PSAP/CD9/NDRG1/MBP/S100B/PARD3/NRG1/ID4/DLG1/DICER1/ACER3/HGF	18
BP	GO:0042326	negative regulation of phosphorylation	32/442	190/5658	2.20382e-05	0.000236373	0.000140903	APOE/HSPB1/APC/PEBP1/LDLRAD4/GADD45B/TAOK3/DUSP1/JUN/ITCH/PTPRJ/PRNP/STAT3/ANGPT1/UBASH3B/SORL1/TSC2/NDRG2/PARD3/RGN/SOCS3/FOXO1/PTPRT/PPARGC1A/CAMK2N1/WWTR1/DDIT4/DLG1/PPP2R5A/KAT2B/HGF/FBLN1	32
BP	GO:0050920	regulation of chemotaxis	23/442	116/5658	2.3353e-05	0.000249816	0.000148916	HSPB1/TMSB4X/PDGFRB/SEMA5A/PTN/CCL2/CXCL14/F3/FGF2/DUSP1/TUBB2B/CDH13/NRP1/SEMA3E/DSCAM/FGF1/ADAM10/C5/IL6R/S1PR1/TIAM1/FGFR1/DDT	23
BP	GO:0003006	developmental process involved in reproduction	40/442	262/5658	2.34484e-05	0.000250177	0.000149131	FGFR2/GJA1/PDGFRB/PTN/STK3/TNC/ZFP36L1/BMPR1B/BMPR1A/CNTFR/GLI2/SULF1/CTNNA1/SERPINE2/SOX9/PSAP/TGFB2/UBB/SMARCC1/SOCS3/SF1/RBPJ/ITGB8/HIF1A/MERTK/ID4/RPS6/ATM/DACH1/DLG1/HSPA5/EAF2/HTRA1/DIAPH2/FRS2/PKD2/BIRC2/AR/PTCH1/ARID1A	40
BP	GO:0050730	regulation of peptidyl-tyrosine phosphorylation	24/442	124/5658	2.36991e-05	0.000252063	0.000150255	CCK/AGT/HES5/FYN/TNK2/NRP1/PTPRJ/PRNP/FGFR3/STAT3/ANGPT1/SOCS3/ABI1/IL6ST/NRG1/GPRC5B/NEDD9/IL6R/RICTOR/IQGAP1/PDGFC/HGF/ADORA1/GHR	24
BP	GO:0009636	response to toxic substance	35/442	217/5658	2.37491e-05	0.000252063	0.000150255	APOE/MT3/FGFR2/FOS/NR4A3/PDGFRB/GABRB1/NR4A2/TNC/SLC7A11/ITPR2/MAP3K5/FYN/DUSP1/B2M/JUN/PSAP/DNM2/GSN/STAT3/EGR1/MBP/ACTB/GPR37L1/RGN/AQP1/FOXO1/PPARGC1A/STAT1/GNAO1/TXNIP/BIRC2/CAPN2/HGF/PRDX1	35
BP	GO:0032526	response to retinoic acid	13/442	45/5658	2.42746e-05	0.00025697	0.00015318	FGFR2/GJA1/PDGFRB/CD38/TNC/DUSP1/SOX9/AQP1/ABCA1/YAP1/ATM/CTSH/PTCH1	13
BP	GO:0016071	mRNA metabolic process	47/442	328/5658	2.45327e-05	0.000259027	0.000154407	HSPA1A/HSPB1/HSPA1B/PRKCA/RPS15/ZFP36L1/ZFP36/HNRNPA2B1/RPL18/RPL8/TOB1/RPS25/DDX5/FUS/HNRNPM/LGALS3/UBB/RPS27A/RPL28/STAT3/RPL10/SRSF6/PTBP2/RPL23A/RPL37/SF1/RPLP2/PPARGC1A/RPS24/CDC73/HIF1A/UBC/RPS6/ATM/DCP1B/RPL19/HNRNPD/POLR2L/RPS12/POLR2J/RPLP1/RPL12/RPL37A/RPS9/HSPA8/PRPF6/RPL31	47
BP	GO:0030097	hemopoiesis	55/442	406/5658	2.54091e-05	0.000267586	0.000159509	HSPA1A/HSPA1B/ID2/FGFR2/FOS/PRKCA/TFRC/NR4A3/PTPRZ1/PDGFRB/ETV6/PTN/MYO1E/STK3/TOB2/ZFP36L1/MEIS2/HES5/ZFP36/GAB2/GLI2/PREX1/ZMIZ1/B2M/PML/JUN/ITCH/PTPRJ/ZEB1/LGALS3/TGFB2/DTX1/STAT3/EGR1/WASF2/ANGPT1/UBASH3B/NCOA6/RBPJ/ABI1/CDC73/SH3RF1/YAP1/MEF2C/HIF1A/HIPK2/MERTK/RPS6/ATM/STAT1/SIPA1L3/BCL6/KAT2B/AP3B1/TGFBR3	55
BP	GO:0045785	positive regulation of cell adhesion	35/442	218/5658	2.62716e-05	0.00027536	0.000164143	PRKCA/TFRC/NR4A3/MAP4K4/PTN/DOCK1/LIMS1/CCL2/FYN/GLI2/PREX1/ZMIZ1/CDH13/VAV3/NRP1/FN1/PTPRJ/DNM2/TGFB2/MYO10/ANGPT1/IL6ST/ITGA6/ITGAV/NEDD9/SDC4/ATM/FRMD5/IL6R/BCL6/UTRN/IQGAP1/AP3B1/DOCK5/HLA-E	35
BP	GO:0045665	negative regulation of neuron differentiation	22/442	109/5658	2.62828e-05	0.00027536	0.000164143	APOE/MT3/ID2/MAP4K4/SEMA5A/CD38/NLGN1/HES5/LRP1/PMP22/DAB1/NRP1/SOX9/B2M/SEMA3E/KANK1/DTX1/PTPRG/GPR37L1/ID1/ID4/DNM3	22
BP	GO:0042063	gliogenesis	29/442	166/5658	2.66297e-05	0.000278277	0.000165881	MT3/ID2/CLU/PTPRZ1/PTN/ARHGEF10/HES5/LRP1/CCL2/DAB1/SERPINE2/SOX9/CD9/GSN/TGFB2/IL33/NDRG1/DTX1/STAT3/GPR37L1/S100B/PARD3/IL6ST/NRG1/ID4/DICER1/NR1D1/NFIB/TIAM1	29
BP	GO:0007568	aging	25/442	133/5658	2.70783e-05	0.000282239	0.000168244	ID2/FOS/APOD/PDGFRB/AGT/LIMS1/LRP1/BMPR1A/JUND/ZMIZ1/CTNNA1/B2M/PML/JUN/GSN/PRNP/STAT3/RGN/PPARGC1A/ATM/GNAO1/NAMPT/BCL6/TGFB3/MORC3	25
MF	GO:0070851	growth factor receptor binding	15/438	56/5628	1.51521e-05	0.000284754	0.000201844	PDGFRB/PLSCR1/FYN/FGF2/VAV3/TNK2/PTPRJ/EFEMP1/FGF1/IL6ST/VAV2/HIP1/IL6R/FRS2/PDGFC	15
BP	GO:0030324	lung development	20/442	94/5658	2.74145e-05	0.000285013	0.000169897	FGFR2/PDGFRB/PTN/TNC/SLC7A11/BMPR1A/CHI3L1/GLI2/SOX9/LAMA1/FGF1/SRSF6/RBPJ/ID1/YAP1/NFIB/TGFB3/FGFR1/TNS3/CTSH	20
CC	GO:0031253	cell projection membrane	26/441	148/5894	3.04955e-05	0.000294113	0.00018975	APC/DLC1/CFL1/SLC7A11/ANTXR1/GABRG1/CASK/PTPRJ/DNM2/MSN/MYO10/KANK1/GPR37L1/AQP1/HIP1R/WLS/KSR1/ITGAV/DLG1/APPL2/GNA12/TIAM1/UTRN/PKD2/ADORA1/PTCH1	26
BP	GO:0009612	response to mechanical stimulus	22/442	110/5658	3.05177e-05	0.000310913	0.000185336	GJA1/FOS/PTN/AGT/TNC/MEIS2/CHI3L1/JUND/FYN/SERPINE2/SOX9/JUN/FAS/CRADD/MAP3K14/AQP1/NRXN1/SLC1A3/STAT1/TXNIP/PKD2/PTCH1	22
BP	GO:0032868	response to insulin	22/442	110/5658	3.05177e-05	0.000310913	0.000185336	APC/AGT/ZFP36L1/CCND3/PHIP/PIK3C2A/SLC27A1/GAB1/SMARCC1/KANK1/EGR1/SRSF6/SORL1/TSC2/SOCS3/FOXO1/SORBS1/ATP6V0E1/STAT1/APPL2/KAT2B/CFLAR	22
BP	GO:0061138	morphogenesis of a branching epithelium	22/442	110/5658	3.05177e-05	0.000310913	0.000185336	FGFR2/AGT/TNC/FGF2/GLI2/SULF1/NRP1/SOX9/PML/SEMA3E/LAMA1/FGF1/SOCS3/YAP1/DLG1/FGFR1/FRS2/PKD2/CTSH/HGF/AR/PTCH1	22
BP	GO:0001649	osteoblast differentiation	23/442	118/5658	3.1149e-05	0.000316552	0.000188698	ID2/FGFR2/GJA1/RPS15/TNC/BMPR1B/BMPR1A/JUND/GLI2/TOB1/DDX5/IL6ST/DDR2/ID1/MEF2C/ID4/WWTR1/SH3PXD2B/IL6R/VCAN/FBN2/HGF/PTCH1	23
BP	GO:0048145	regulation of fibroblast proliferation	13/442	46/5658	3.14717e-05	0.000319033	0.000190177	PDGFRB/AGT/ZMIZ1/FN1/PML/JUN/AQP1/DDR2/CDC73/S100A6/DACH1/MORC3/PDGFC	13
BP	GO:0032102	negative regulation of response to external stimulus	28/442	159/5658	3.15651e-05	0.000319184	0.000190266	APOE/GJA1/APOD/CCK/SEMA5A/CCL2/FGF2/DUSP1/PRKG1/NRP1/SERPINE2/CD9/CASK/ITCH/SEMA3E/UBASH3B/WFDC1/SOCS3/SEC14L1/NRXN1/NR1D1/APPL2/C5/HTRA1/ADAMTS18/HGF/ADORA1/DDT	28
BP	GO:0071277	cellular response to calcium ion	11/442	34/5658	3.20232e-05	0.000322214	0.000192073	FOS/NLGN1/JUND/JUN/FUS/SYT1/ADCY8/MEF2C/HSPA5/IQGAP1/PKD2	11
BP	GO:1901863	positive regulation of muscle tissue development	11/442	34/5658	3.20232e-05	0.000322214	0.000192073	FGFR2/GJA1/BMPR1A/FGF2/RBPJ/PPARGC1A/NRG1/YAP1/MEF2C/FGFR1/TGFBR3	11
BP	GO:0007254	JNK cascade	20/442	95/5658	3.22612e-05	0.000323807	0.000193022	MAP4K4/STK3/GADD45B/MINK1/TAOK3/MAP3K5/TNIK/ITCH/UBB/RPS27A/SPAG9/EPHB1/SH3RF1/SASH1/HIPK2/UBC/ADORA2B/TPD52L1/TIAM1/TAB2	20
BP	GO:0032835	glomerulus development	12/442	40/5658	3.29298e-05	0.000329703	0.000196537	PDGFRB/MYO1E/SULF1/EGR1/ANGPT1/PLCE1/MEF2C/WWTR1/IL6R/IQGAP1/COL4A3/CFLAR	12
BP	GO:0060485	mesenchyme development	27/442	151/5658	3.30439e-05	0.000330033	0.000196734	FGFR2/PDGFRB/LDLRAD4/SEMA5A/CFL1/ZFP36L1/BMPR1A/PHACTR4/NRP1/FN1/SOX9/DDX5/SEMA3E/TGFB2/RBPJ/NRG1/YAP1/MEF2C/HIF1A/WWTR1/STAT1/TIAM1/TGFB3/FGFR1/PKD2/HGF/TGFBR3	27
CC	GO:0098797	plasma membrane protein complex	38/441	259/5894	3.63284e-05	0.00034275	0.000221129	GJA1/PRKCA/GNA14/TFRC/APC/NLGN1/BMPR1B/LRP1/BMPR1A/TF/CNTFR/SLC3A2/CTNNA1/CDH13/TNK2/ABCD4/B2M/FAS/GNG7/RAMP1/NEO1/HIP1R/SORBS1/IL6ST/ITGA6/ITGB8/ITGAV/DLG1/HIP1/GNAO1/GNA12/C5/IL6R/UTRN/BIRC2/TGFBR3/CFLAR/HLA-E	38
BP	GO:0031032	actomyosin structure organization	19/442	88/5658	3.50316e-05	0.000348175	0.000207548	STMN1/PDGFRB/DLC1/ARHGEF10/AKAP13/ACTG1/NRP1/WASF2/MYO18A/SORBS1/ELN/MEF2C/SDC4/FRMD5/SH3PXD2B/S1PR1/TGFB3/ARHGEF10L/CFLAR	19
BP	GO:0032869	cellular response to insulin stimulus	19/442	88/5658	3.50316e-05	0.000348175	0.000207548	APC/AGT/ZFP36L1/CCND3/PHIP/PIK3C2A/GAB1/SMARCC1/KANK1/SORL1/TSC2/SOCS3/FOXO1/SORBS1/ATP6V0E1/STAT1/APPL2/KAT2B/CFLAR	19
BP	GO:0043542	endothelial cell migration	22/442	111/5658	3.53555e-05	0.000350537	0.000208956	APOE/HSPB1/TMSB4X/PRKCA/GLUL/SEMA5A/PTN/AGT/NR4A1/FGF2/CDH13/NRP1/PIK3C2A/FGF1/ANGPT1/ID1/MEF2C/HIF1A/SASH1/PTPRM/ADAMTS9/FGFR1	22
BP	GO:0007173	epidermal growth factor receptor signaling pathway	14/442	53/5658	3.61585e-05	0.000357626	0.000213182	AGT/CDH13/SOX9/PIK3C2A/GAB1/PTPRJ/EFEMP1/RPS6KA5/PLCE1/HIP1R/HIP1/IQGAP1/IFI6/ADORA1	14
BP	GO:0006352	DNA-templated transcription, initiation	18/442	81/5658	3.73812e-05	0.000367929	0.000219323	NR4A3/NR4A2/MAML2/NR4A1/SOX9/JUN/NCOA6/RBPJ/PPARGC1A/YAP1/WWTR1/NR1D1/POLR2L/POLR2J/KAT2B/AR/BAZ2A/NR1H2	18
BP	GO:0010950	positive regulation of endopeptidase activity	18/442	81/5658	3.73812e-05	0.000367929	0.000219323	CCK/DLC1/MAP3K5/FYN/F3/PML/FAS/GSN/STAT3/MBP/EGLN3/CRADD/HIP1R/HIP1/ST18/ASPH/CTSH/COL4A3	18
BP	GO:0002262	myeloid cell homeostasis	17/442	74/5658	3.90266e-05	0.000382272	0.000227874	HSPA1A/HSPA1B/ID2/SLC7A11/ZFP36L1/ZFP36/B2M/STAT3/RPS24/HIF1A/HIPK2/MERTK/RPS6/STAT1/BCL6/TGFBR3/PRDX1	17
BP	GO:1905475	regulation of protein localization to membrane	17/442	74/5658	3.90266e-05	0.000382272	0.000227874	GPC6/PTN/SLC7A11/LRP1/TMBIM1/FYN/GPC5/GSN/PRNP/LGALS3/ACTB/ADAM10/SORBS1/DLG1/YWHAE/PPP2R5A/AR	17
BP	GO:0032570	response to progesterone	10/442	29/5658	3.94726e-05	0.000385712	0.000229924	FOS/GABRB1/PTN/CD38/WBP2/TGFB2/YAP1/TXNIP/TGFB3/NCOA2	10
BP	GO:0010811	positive regulation of cell-substrate adhesion	16/442	67/5658	3.96244e-05	0.000386267	0.000230255	MAP4K4/PTN/DOCK1/LIMS1/PREX1/CDH13/NRP1/FN1/PTPRJ/DNM2/ITGA6/NEDD9/SDC4/UTRN/IQGAP1/DOCK5	16
BP	GO:0023061	signal release	28/442	161/5658	3.99442e-05	0.000388453	0.000231558	GJA1/PRKCA/GLUL/CAMK2G/MAP4K4/TCF7L2/CD38/NLGN1/AGT/ITPR2/LRP1/CPE/CASK/SYT1/RAP1B/ADCY8/NRXN1/WLS/MEF2C/HIF1A/ADORA2B/NR1D1/HMGN3/TIAM1/FGFR1/SRI/ADORA1/HSPA8	28
BP	GO:0048144	fibroblast proliferation	13/442	47/5658	4.04645e-05	0.000392574	0.000234014	PDGFRB/AGT/ZMIZ1/FN1/PML/JUN/AQP1/DDR2/CDC73/S100A6/DACH1/MORC3/PDGFC	13
BP	GO:0010594	regulation of endothelial cell migration	19/442	89/5658	4.13847e-05	0.000400545	0.000238766	APOE/HSPB1/TMSB4X/PRKCA/GLUL/SEMA5A/PTN/AGT/FGF2/NRP1/PIK3C2A/FGF1/ANGPT1/MEF2C/HIF1A/SASH1/PTPRM/ADAMTS9/FGFR1	19
BP	GO:0048534	hematopoietic or lymphoid organ development	56/442	423/5658	4.16858e-05	0.000402501	0.000239932	HSPA1A/HSPA1B/ID2/FGFR2/FOS/PRKCA/TFRC/NR4A3/PTPRZ1/PDGFRB/ETV6/PTN/MYO1E/STK3/TOB2/ZFP36L1/MEIS2/HES5/ZFP36/GAB2/GLI2/PREX1/ZMIZ1/B2M/PML/JUN/ITCH/PTPRJ/ZEB1/LGALS3/TGFB2/DTX1/STAT3/EGR1/WASF2/ANGPT1/UBASH3B/NCOA6/JARID2/RBPJ/ABI1/CDC73/SH3RF1/YAP1/MEF2C/HIF1A/HIPK2/MERTK/RPS6/ATM/STAT1/SIPA1L3/BCL6/KAT2B/AP3B1/TGFBR3	56
BP	GO:0001933	negative regulation of protein phosphorylation	30/442	179/5658	4.39603e-05	0.000423456	0.000252424	APOE/HSPB1/APC/PEBP1/LDLRAD4/GADD45B/TAOK3/DUSP1/JUN/ITCH/PTPRJ/PRNP/ANGPT1/UBASH3B/SORL1/TSC2/NDRG2/PARD3/RGN/SOCS3/FOXO1/PTPRT/PPARGC1A/CAMK2N1/WWTR1/DDIT4/DLG1/KAT2B/HGF/FBLN1	30
BP	GO:0060560	developmental growth involved in morphogenesis	20/442	97/5658	4.43107e-05	0.000425823	0.000253834	APOE/HSP90AA1/MT3/FGFR2/SEMA5A/TNC/LRP1/NRP1/FN1/SOX9/SEMA3E/DNM2/DSCAM/FGF1/SYT1/LHX2/YAP1/S1PR1/TIAM1/IQGAP1	20
BP	GO:0043112	receptor metabolic process	18/442	82/5658	4.45068e-05	0.000426698	0.000254356	APOE/TFRC/LRP1/CD63/CD9/ITCH/DNM2/RAMP1/OPHN1/ANGPT1/SORL1/FUT8/NRG1/HIF1A/ITGAV/ZNRF3/NR1D1/DNM3	18
BP	GO:0035690	cellular response to drug	28/442	162/5658	4.48466e-05	0.000428944	0.000255695	MT3/TFRC/NR4A3/ITPR2/MAP3K5/FYN/CTNNA1/SOX9/B2M/PSAP/DNM2/PRNP/EGR1/RAP1B/ACTB/ADCY8/GPR37L1/AQP1/FOXO1/PPARGC1A/ID1/MEF2C/ATP2B4/DDIT4/HSPA5/HNRNPD/HGF/CFLAR	28
BP	GO:0048010	vascular endothelial growth factor receptor signaling pathway	14/442	54/5658	4.53918e-05	0.00043314	0.000258196	HSPB1/HSP90AA1/MT3/DOCK1/FYN/SULF1/VAV3/NRP1/WASF2/ABI1/HIF1A/ITGAV/VAV2/EPN2	14
BP	GO:0038093	Fc receptor signaling pathway	17/442	75/5658	4.6902e-05	0.00044546	0.00026554	HSP90AA1/FOS/NR4A3/DOCK1/ACTG1/GAB2/FYN/VAV3/JUN/PTPRJ/MYO10/WASF2/ACTB/ABI1/VAV2/APPL2/TAB2	17
BP	GO:0051493	regulation of cytoskeleton organization	34/442	215/5658	4.72905e-05	0.000448102	0.000267115	HSPA1A/HSPA1B/TMSB4X/STMN1/APC/PDGFRB/SEMA5A/DLC1/CFL1/ARHGEF10/AKAP13/LRP1/PREX1/NRP1/TPR/SEMA3E/GSN/BST2/KANK1/WASF2/HIP1R/ID1/ELN/MEF2C/SDC4/DLG1/SH3PXD2B/S1PR1/ARHGAP17/RICTOR/KAT2B/TGFB3/ARHGEF10L/CAPN2	34
BP	GO:0034101	erythrocyte homeostasis	15/442	61/5658	4.78251e-05	0.000452114	0.000269507	HSPA1A/HSPA1B/ID2/ZFP36L1/ZFP36/B2M/STAT3/RPS24/HIF1A/HIPK2/RPS6/STAT1/BCL6/TGFBR3/PRDX1	15
CC	GO:0031252	cell leading edge	30/441	188/5894	5.1168e-05	0.000462644	0.00029848	APC/DLC1/CFL1/ANTXR1/GABRG1/PHACTR4/CTNNA1/MCC/PTPRJ/DNM2/GSN/MYO10/KANK1/WASF2/S100B/ARHGAP31/ABI1/HIP1R/SH3RF1/WLS/KSR1/ITGAV/NEDD9/PTPRM/S100A6/APPL2/TIAM1/IQGAP1/PKD2/ADORA1	30
MF	GO:0016772	transferase activity, transferring phosphorus-containing groups	44/438	302/5628	2.71518e-05	0.000477346	0.00033836	FGFR2/PRKCA/MMD2/CAMK2G/PDGFRB/MAP4K4/STK3/AKAP13/BMPR1B/BMPR1A/MINK1/TAOK3/CCL2/EPHA6/MAP3K5/FYN/TNIK/CCND3/LTBP1/PRKG1/TNK2/NRP1/PIK3C2A/RPS6KA2/CASK/EFEMP1/FGFR3/CSNK1A1/RPS6KA5/MAP3K14/EPHB1/DDR2/KSR1/HIPK2/MERTK/ATM/DLG1/POLR2L/JAK1/POLR2J/STK10/FGFR1/NEK7/TGFBR3	44
MF	GO:0019838	growth factor binding	18/438	80/5628	2.97099e-05	0.000505997	0.000358669	FGFR2/PDGFRB/PTN/BMPR1B/BMPR1A/DUSP1/LTBP1/NRP1/FGFR3/IL6ST/ITGA6/ITGAV/IL6R/HTRA1/TGFB3/FGFR1/TGFBR3/GHR	18
BP	GO:0001763	morphogenesis of a branching structure	22/442	114/5658	5.4266e-05	0.000510628	0.000304387	FGFR2/AGT/TNC/FGF2/GLI2/SULF1/NRP1/SOX9/PML/SEMA3E/LAMA1/FGF1/SOCS3/YAP1/DLG1/FGFR1/FRS2/PKD2/CTSH/HGF/AR/PTCH1	22
BP	GO:0060828	regulation of canonical Wnt signaling pathway	22/442	114/5658	5.4266e-05	0.000510628	0.000304387	APOE/FGFR2/APC/SEMA5A/TCF7L2/STK3/SMURF2/GPC5/SOX9/MCC/KANK1/CCNY/EGR1/CSNK1A1/FOXO1/RBPJ/WLS/YAP1/GPRC5B/ZNRF3/WWTR1/TBL1X	22
BP	GO:0048146	positive regulation of fibroblast proliferation	10/442	30/5658	5.51333e-05	0.000516398	0.000307826	PDGFRB/AGT/ZMIZ1/FN1/PML/JUN/AQP1/DDR2/S100A6/PDGFC	10
BP	GO:0048814	regulation of dendrite morphogenesis	10/442	30/5658	5.51333e-05	0.000516398	0.000307826	PTPRD/CFL1/NLGN1/IL1RAPL1/CUX1/TNIK/ADAM10/ID1/DNM3/TIAM1	10
MF	GO:0046332	SMAD binding	12/438	40/5628	3.16936e-05	0.000523425	0.000371023	FOS/LDLRAD4/BMPR1B/SMURF2/BMPR1A/PRDM16/TOB1/PML/JUN/DDX5/HIPK2/TGFBR3	12
BP	GO:0072073	kidney epithelium development	17/442	76/5658	5.61511e-05	0.000523648	0.000312148	FGFR2/MYO1E/AGT/HES5/FGF2/SOX9/FGF1/YAP1/MEF2C/WWTR1/SDC4/STAT1/DLG1/IQGAP1/FGFR1/PKD2/PTCH1	17
BP	GO:0002433	immune response-regulating cell surface receptor signaling pathway involved in phagocytosis	12/442	42/5658	5.64226e-05	0.000523648	0.000312148	HSP90AA1/DOCK1/ACTG1/FYN/VAV3/PTPRJ/MYO10/WASF2/ACTB/ABI1/VAV2/APPL2	12
BP	GO:0032092	positive regulation of protein binding	12/442	42/5658	5.64226e-05	0.000523648	0.000312148	APOE/TCF7L2/STK3/LRP1/NRP1/B2M/LGALS3/HIP1R/MEF2C/HIPK2/TIAM1/SPON1	12
BP	GO:0038096	Fc-gamma receptor signaling pathway involved in phagocytosis	12/442	42/5658	5.64226e-05	0.000523648	0.000312148	HSP90AA1/DOCK1/ACTG1/FYN/VAV3/PTPRJ/MYO10/WASF2/ACTB/ABI1/VAV2/APPL2	12
BP	GO:0008286	insulin receptor signaling pathway	14/442	55/5658	5.66239e-05	0.00052432	0.000312548	APC/AGT/CCND3/PHIP/PIK3C2A/GAB1/SMARCC1/KANK1/SORL1/TSC2/SOCS3/FOXO1/SORBS1/ATP6V0E1	14
BP	GO:0090066	regulation of anatomical structure size	33/442	208/5658	5.72984e-05	0.000529359	0.000315553	APOE/MT3/GJA1/TMSB4X/DOCK4/SEMA5A/CFL1/CD38/AGT/LRP1/PREX1/PRKG1/VAV3/NRP1/FN1/PIK3C2A/SEMA3E/DNM2/GSN/MSN/DSCAM/KANK1/AQP1/HIP1R/ELN/PTPRM/ADORA2B/DLG1/HP1BP3/VAV2/RICTOR/DOCK5/ADORA1	33
BP	GO:0001764	neuron migration	16/442	69/5658	5.82884e-05	0.000537284	0.000320276	GJA1/CCK/NR4A2/FYN/PRKG1/TUBB2B/DAB1/NRP1/STAT3/SH3RF1/NRG1/MEF2C/DDIT4/YWHAE/FGFR1/NRG3	16
BP	GO:0030902	hindbrain development	15/442	62/5658	5.86547e-05	0.000539438	0.00032156	DLC1/PTN/GLI2/NLGN4X/DAB1/SERPINE2/PTBP2/OPHN1/GPR37L1/PPARGC1A/WLS/HSPA5/HNRNPD/NFIB/MYO16	15
BP	GO:0044092	negative regulation of molecular function	61/442	479/5658	5.98553e-05	0.000549237	0.000327402	APOE/HSPB1/MT3/ID2/TMSB4X/STMN1/APC/PEBP1/PTN/TCF7L2/AGT/GADD45B/ZFP36/TAOK3/TMBIM1/DUSP1/TNK2/SERPINE2/B2M/JUN/ITCH/PTPRJ/PRNP/BST2/LGALS3/TGFB2/UBASH3B/ACTB/SORL1/FGF12/TSC2/WFDC1/RGN/SOCS3/AQP1/PTPRT/PPARGC1A/LHX2/SH3RF1/ID1/CAMK2N1/ID4/WWTR1/ATP2B4/HSPA5/C5/TXNIP/YWHAE/PPP2R5A/KAT2B/IQGAP1/IFI6/PKD2/PRMT2/SRI/BIRC2/HGF/CAST/PTCH1/COL4A3/CFLAR	61
BP	GO:0048762	mesenchymal cell differentiation	23/442	123/5658	6.18137e-05	0.000565127	0.000336874	FGFR2/LDLRAD4/SEMA5A/CFL1/BMPR1A/PHACTR4/NRP1/FN1/SOX9/DDX5/SEMA3E/TGFB2/RBPJ/NRG1/MEF2C/HIF1A/WWTR1/STAT1/TIAM1/TGFB3/FGFR1/HGF/TGFBR3	23
BP	GO:0060541	respiratory system development	21/442	107/5658	6.18651e-05	0.000565127	0.000336874	FGFR2/PDGFRB/PTN/TNC/SLC7A11/BMPR1A/CHI3L1/GLI2/SOX9/LAMA1/FGF1/SRSF6/RBPJ/ID1/YAP1/NFIB/TGFB3/FGFR1/TULP3/TNS3/CTSH	21
BP	GO:0002520	immune system development	57/442	439/5658	6.20486e-05	0.000565532	0.000337115	HSPA1A/HSPA1B/ID2/FGFR2/FOS/PRKCA/TFRC/NR4A3/PTPRZ1/PDGFRB/ETV6/PTN/MYO1E/STK3/TOB2/ZFP36L1/MEIS2/HES5/ZFP36/GAB2/GLI2/PREX1/ZMIZ1/B2M/PML/JUN/ITCH/PTPRJ/ZEB1/LGALS3/TGFB2/DTX1/STAT3/EGR1/WASF2/ANGPT1/UBASH3B/NCOA6/JARID2/RBPJ/ABI1/CDC73/SH3RF1/YAP1/MEF2C/HIF1A/HIPK2/MERTK/RPS6/ATM/STAT1/SIPA1L3/BCL6/KAT2B/AP3B1/TGFBR3/HLA-E	57
CC	GO:0030659	cytoplasmic vesicle membrane	44/441	325/5894	6.53227e-05	0.000578572	0.000373272	APOE/TFRC/CAMK2G/CD38/ITPR2/LRP1/TF/CPE/TMBIM1/TNK2/B2M/CD63/PSAP/CD9/PTPRJ/DNM2/BST2/LGALS3/UBB/RPS27A/SYT1/RAP1B/ADCY8/ADAM10/HIP1R/WLS/ABCC4/GPRC5B/ITGAV/ATP6V0E1/UBC/ARHGAP21/HIP1/APPL2/STK10/IQGAP1/PKD2/SRI/AP3B1/ARFGAP3/PTCH1/HSPA8/EPN2/HLA-E	44
BP	GO:0050865	regulation of cell activation	40/442	274/5658	6.68463e-05	0.000604193	0.000360161	APOE/ID2/PRKCA/TFRC/NR4A3/PDGFRB/PLSCR1/CD38/ZFP36L1/GAB2/CCL2/FYN/GLI2/ZMIZ1/PRKG1/VAV3/SERPINE2/CD9/ZEB1/GSN/PRNP/LGALS3/IL33/DTX1/UBASH3B/MYO18A/IL6ST/SH3RF1/MEF2C/MERTK/SDC4/ATM/ADORA2B/DLG1/NR1D1/IL6R/BCL6/AP3B1/ADAMTS18/HLA-E	40
BP	GO:0021915	neural tube development	17/442	77/5658	6.69747e-05	0.000604193	0.000360161	DLC1/CFL1/STK3/ZFP36L1/HES5/GLI2/PHACTR4/TGFB2/INTU/TSC2/LHX2/HIF1A/SDC4/TULP3/PKD2/PTCH1/ARID1A	17
BP	GO:0035148	tube formation	17/442	77/5658	6.69747e-05	0.000604193	0.000360161	FGFR2/DLC1/CFL1/STK3/HES5/PHACTR4/SOX9/TGFB2/TSC2/LHX2/HIF1A/SDC4/DICER1/NFIB/TULP3/PTCH1/ARID1A	17
BP	GO:0009755	hormone-mediated signaling pathway	19/442	92/5658	6.70335e-05	0.000604193	0.000360161	NR4A3/NR4A2/AKAP13/NR4A1/NCOR2/WBP2/SLC27A1/DDX5/SST/NCOA6/PPARGC1A/YAP1/TADA3/NR1D1/APPL2/PRMT2/AR/NR1H2/ARID1A	19
MF	GO:0060090	molecular adaptor activity	19/438	89/5628	3.92366e-05	0.00061097	0.000433078	AKAP13/GAB2/CUX1/TOB1/VAV3/GAB1/SPAG9/CRADD/HIP1R/SORBS1/SH3RF1/KSR1/SASH1/DLG1/HIP1/CHN2/IQGAP1/FRS2/HSPA8	19
BP	GO:0010977	negative regulation of neuron projection development	16/442	70/5658	7.02374e-05	0.000628234	0.000374492	APOE/MT3/MAP4K4/SEMA5A/CD38/NLGN1/LRP1/PMP22/DAB1/NRP1/B2M/SEMA3E/KANK1/PTPRG/ID1/DNM3	16
BP	GO:0048639	positive regulation of developmental growth	16/442	70/5658	7.02374e-05	0.000628234	0.000374492	FGFR2/SEMA5A/LRP1/BMPR1A/FGF2/NRP1/FN1/DSCAM/SYT1/RBPJ/YAP1/MEF2C/SH3PXD2B/FGFR1/TGFBR3/GHR	16
BP	GO:2001056	positive regulation of cysteine-type endopeptidase activity	16/442	70/5658	7.02374e-05	0.000628234	0.000374492	CCK/DLC1/MAP3K5/FYN/F3/PML/FAS/GSN/EGLN3/CRADD/HIP1R/HIP1/ST18/ASPH/CTSH/COL4A3	16
BP	GO:0031647	regulation of protein stability	21/442	108/5658	7.13468e-05	0.000631089	0.000376194	HSPA1A/HSP90AA1/MT3/HSPA1B/CLU/STK3/TF/GSN/PRNP/HIP1R/PPARGC1A/CDC73/ID1/TADA3/TBL1X/NR1D1/HIP1/ASPH/MORC3/CTSH/HSPA8	21
BP	GO:0050806	positive regulation of synaptic transmission	15/442	63/5658	7.15756e-05	0.000631089	0.000376194	APOE/GLUL/PTN/NLGN1/CCL2/SERPINE2/PRNP/SYT1/ADCY8/S100B/LGI1/NRXN1/SLC1A3/IGSF11/ADORA1	15
MF	GO:0035591	signaling adaptor activity	11/438	35/5628	4.19483e-05	0.000635051	0.000450147	AKAP13/GAB2/TOB1/VAV3/GAB1/SPAG9/SORBS1/SH3RF1/KSR1/CHN2/FRS2	11
BP	GO:0071396	cellular response to lipid	39/442	266/5658	7.50813e-05	0.000653545	0.00038958	FGFR2/PRKCA/CLU/NR4A3/PTN/NR4A2/TNC/ZFP36L1/AKAP13/ZFP36/NR4A1/CCL2/NCOR2/WBP2/SOX9/DDX5/MSN/ADCY8/NCOA6/AQP1/FOXO1/PPARGC1A/ABCA1/CDC73/YAP1/MEF2C/TADA3/SASH1/ATM/DDIT4/NR1D1/HNRNPD/PRMT2/CAPN2/AR/PTCH1/NR1H2/ARID1A/CFLAR	39
BP	GO:0050795	regulation of behavior	10/442	31/5658	7.57884e-05	0.000656886	0.000391572	APOE/GJA1/NR4A3/CCK/NLGN1/STAT3/NRXN1/MEF2C/NR1D1/ADORA1	10
BP	GO:1900034	regulation of cellular response to heat	10/442	31/5658	7.57884e-05	0.000656886	0.000391572	HSPA1A/HSP90AA1/HSPA1B/CAMK2G/DNAJB1/TPR/ATM/NUP160/YWHAE/HSPA8	10
MF	GO:0003682	chromatin binding	33/438	207/5628	4.80304e-05	0.000707475	0.000501484	FOS/TCF7L2/HES5/GLI2/NCOR2/WBP2/SOX9/JUN/TPR/DDX5/ZEB1/FUS/SMARCC1/STAT3/EGR1/ACTB/NCOA6/JARID2/FOXO1/RBPJ/PPARGC1A/LHX2/YAP1/MEF2C/STAT1/HP1BP3/HNRNPD/HMGN3/BCL6/KAT2B/AR/NCOA2/ARID1A	33
BP	GO:0034605	cellular response to heat	13/442	50/5658	8.21468e-05	0.000710483	0.000423521	HSPA1A/HSP90AA1/HSPA1B/CAMK2G/DNAJB1/TPR/FGF1/ATM/HSPA5/NUP160/YWHAE/ST8SIA1/HSPA8	13
BP	GO:0048568	embryonic organ development	33/442	212/5658	8.42748e-05	0.000725895	0.000432708	ID2/FGFR2/GJA1/NR4A3/STK3/ZFP36L1/BMPR1A/GLI2/PHACTR4/TUBB2B/SOX9/PRRX1/ZEB1/EFEMP1/TGFB2/RPL10/SOCS3/RBPJ/YAP1/MEF2C/HIF1A/HIPK2/DLG1/CHST11/TGFB3/FGFR1/TULP3/FRS2/PKD2/FBN2/PDGFC/PTCH1/ARID1A	33
BP	GO:0097696	STAT cascade	16/442	71/5658	8.4286e-05	0.000725895	0.000432708	AGT/HES5/CCL2/FYN/DAB1/FGFR3/STAT3/SOCS3/PTPRT/IL6ST/STAT1/STAMBP/IL6R/STAT2/PKD2/GHR	16
BP	GO:0051046	regulation of secretion	45/442	325/5658	8.63708e-05	0.000740705	0.000441536	APOE/GJA1/TMSB4X/PRKCA/GLUL/CADM1/CCK/MAP4K4/TCF7L2/CD38/NLGN1/AGT/IL1RAPL1/ITPR2/LRP1/GAB2/PPIA/FN1/PML/CASK/TGFB2/IL33/SYT1/RAP1B/ANGPT1/MBP/MYO18A/ADCY8/AQP1/HIP1R/NRG1/WLS/MEF2C/HIF1A/SDC4/ADORA2B/NR1D1/HMGN3/C5/TIAM1/TGFB3/FGFR1/SRI/ADORA1/HLA-E	45
BP	GO:0051592	response to calcium ion	14/442	57/5658	8.65497e-05	0.000740705	0.000441536	FOS/NLGN1/JUND/DUSP1/JUN/FUS/SYT1/ADCY8/MEF2C/HSPA5/HNRNPD/TXNIP/IQGAP1/PKD2	14
BP	GO:0022898	regulation of transmembrane transporter activity	18/442	86/5658	8.65523e-05	0.000740705	0.000441536	GJA1/TMSB4X/NLGN1/MINK1/CCL2/S100A1/DNM2/PRNP/ACTB/FGF12/RGN/PPARGC1A/MEF2C/DLG1/YWHAE/UTRN/PKD2/SRI	18
CC	GO:0098796	membrane protein complex	51/441	401/5894	9.00538e-05	0.000781667	0.000504301	GJA1/PRKCA/GNA14/TFRC/APC/GABRB1/NLGN1/BMPR1B/LRP1/BMPR1A/TF/CNTFR/MAP3K5/GABRG1/SLC3A2/CTNNA1/CDH13/TNK2/ABCD4/B2M/PIK3C2A/FAS/GNG7/RAMP1/NEO1/SOCS3/ADAM10/HIP1R/SORBS1/IL6ST/ITGA6/ITGB8/ITGAV/ATP6V0E1/DLG1/HIP1/GNAO1/GNA12/C5/UBAP1/IL6R/VPS28/UTRN/PKD2/AP3B1/BIRC2/TGFBR3/ARFGAP3/EPN2/CFLAR/HLA-E	51
BP	GO:1903530	regulation of secretion by cell	42/442	297/5658	9.25204e-05	0.000790116	0.00047099	APOE/GJA1/TMSB4X/PRKCA/GLUL/CADM1/CCK/MAP4K4/TCF7L2/CD38/NLGN1/AGT/IL1RAPL1/ITPR2/LRP1/GAB2/PPIA/FN1/PML/CASK/TGFB2/IL33/SYT1/RAP1B/ANGPT1/MBP/MYO18A/ADCY8/WLS/MEF2C/HIF1A/SDC4/ADORA2B/NR1D1/HMGN3/C5/TIAM1/TGFB3/FGFR1/SRI/ADORA1/HLA-E	42
BP	GO:0003012	muscle system process	32/442	204/5658	9.29383e-05	0.000792022	0.000472126	GJA1/PRKCA/NR4A3/CAMK2G/DOCK4/CD38/ENO1/AGT/AKAP13/SULF1/PRKG1/PIK3C2A/GSN/FGF12/PLCE1/JARID2/FOXO1/SORBS1/IL6ST/PPARGC1A/MEF2C/ATP2B4/ADORA2B/DLG1/GNAO1/TIAM1/UTRN/ASPH/SRI/DOCK5/ADORA1/CFLAR	32
BP	GO:0038094	Fc-gamma receptor signaling pathway	12/442	44/5658	9.31688e-05	0.000792325	0.000472307	HSP90AA1/DOCK1/ACTG1/FYN/VAV3/PTPRJ/MYO10/WASF2/ACTB/ABI1/VAV2/APPL2	12
BP	GO:0060326	cell chemotaxis	27/442	160/5658	9.39898e-05	0.000795053	0.000473934	HSPB1/TMSB4X/PDGFRB/DOCK4/SEMA5A/PTN/NR4A1/CCL2/CXCL14/FGF2/PREX1/DUSP1/VAV3/NRP1/GAB1/LGALS3/TGFB2/FGF1/ADAM10/EPHB1/C5/IL6R/S1PR1/TIAM1/FGFR1/HGF/DDT	27
BP	GO:0050921	positive regulation of chemotaxis	17/442	79/5658	9.42667e-05	0.000795053	0.000473934	HSPB1/TMSB4X/PDGFRB/SEMA5A/PTN/CXCL14/F3/FGF2/TUBB2B/CDH13/NRP1/DSCAM/ADAM10/IL6R/S1PR1/TIAM1/FGFR1	17
BP	GO:0110053	regulation of actin filament organization	21/442	110/5658	9.4272e-05	0.000795053	0.000473934	TMSB4X/STMN1/SEMA5A/DLC1/CFL1/ARHGEF10/PREX1/NRP1/GSN/KANK1/WASF2/HIP1R/ID1/ELN/SDC4/DLG1/SH3PXD2B/S1PR1/RICTOR/TGFB3/ARHGEF10L	21
BP	GO:0021549	cerebellum development	11/442	38/5658	0.000101094	0.000850038	0.00050671	PTN/GLI2/NLGN4X/DAB1/SERPINE2/PTBP2/OPHN1/PPARGC1A/HSPA5/HNRNPD/MYO16	11
BP	GO:0045732	positive regulation of protein catabolic process	18/442	87/5658	0.000101419	0.000850038	0.00050671	HSPA1A/APOE/HSP90AA1/HSPA1B/GJA1/CLU/APC/LRP1/SMURF2/SOX9/ITCH/MSN/IL33/CSNK1A1/SORL1/RGN/FOXO1/VPS28	18
BP	GO:0048588	developmental cell growth	18/442	87/5658	0.000101419	0.000850038	0.00050671	APOE/HSP90AA1/MT3/SEMA5A/AGT/AKAP13/LRP1/NRP1/FN1/SOX9/SEMA3E/DNM2/DSCAM/SYT1/LHX2/TIAM1/IQGAP1/PRMT2	18
BP	GO:0007611	learning or memory	19/442	95/5658	0.000105893	0.000883888	0.000526888	APOE/FOS/PTPRZ1/NRXN3/CCK/PTN/AGT/SLC7A11/MEIS2/FYN/NLGN4X/B2M/JUN/PRNP/ADCY8/S100B/NRXN1/MEF2C/HIF1A	19
BP	GO:0048015	phosphatidylinositol-mediated signaling	19/442	95/5658	0.000105893	0.000883888	0.000526888	PDGFRB/PREX2/AGT/ZFP36L1/GAB2/FYN/SERPINE2/SOX9/PIK3C2A/GAB1/GSN/TGFB2/ANGPT1/TSC2/PLCE1/STAMBP/FGFR1/PDGFC/HGF	19
BP	GO:0045766	positive regulation of angiogenesis	20/442	103/5658	0.000107975	0.000895755	0.000533962	HSPB1/PRKCA/SEMA5A/CHI3L1/F3/FGF2/NRP1/PIK3C2A/S100A1/GAB1/STAT3/FGF1/AQP1/ITGB8/HIF1A/SASH1/HIPK2/JAK1/CTSH/HGF	20
BP	GO:0002790	peptide secretion	38/442	262/5658	0.000117672	0.000974208	0.000580728	APOE/GJA1/TMSB4X/PRKCA/GLUL/CAMK2G/CADM1/MAP4K4/TCF7L2/CD38/AGT/ITPR2/LRP1/CHI3L1/CPE/PPIA/FN1/PML/TGFB2/IL33/ANGPT1/MBP/MYO18A/ADCY8/RBPJ/ABCA1/WLS/HIF1A/ITGAV/NR1D1/HMGN3/C5/TIAM1/TGFB3/SRI/ADORA1/ARFGAP3/HLA-E	38
BP	GO:0007044	cell-substrate junction assembly	12/442	45/5658	0.000118221	0.000974786	0.000581072	APOD/MAP4K4/DLC1/LIMS1/LRP1/NRP1/FN1/PTPRJ/SORBS1/ITGA6/SDC4/IQGAP1	12
BP	GO:0043618	regulation of transcription from RNA polymerase II promoter in response to stress	12/442	45/5658	0.000118221	0.000974786	0.000581072	HSPA1A/MT3/DNAJB1/JUN/UBB/RPS27A/EGR1/EGLN3/RBPJ/HIF1A/UBC/HSPA5	12
BP	GO:0030163	protein catabolic process	43/442	310/5658	0.000119801	0.00098581	0.000587644	HSPA1A/APOE/HSP90AA1/HSPA1B/GJA1/CLU/APC/GABARAPL2/LRP1/SMURF2/FYN/SERPINE2/SOX9/PML/ITCH/MSN/IL33/UBB/SMARCC1/RPS27A/RNF213/OPHN1/CSNK1A1/SORL1/RGN/FOXO1/NRG1/HIPK2/ZNRF3/UBC/WWTR1/ATM/TBL1X/HSPA5/NR1D1/GNA12/UBAP1/ADAMTS9/VPS28/CTSH/BIRC2/CAPN2/HSPA8	43
MF	GO:0031072	heat shock protein binding	12/438	43/5628	7.01488e-05	0.00100608	0.000713147	HSPA1A/HSPA1B/DNAJB1/ZFP36/TPR/FGF1/TSC2/KSR1/HIF1A/HSPA5/ADORA1/HSPA8	12
BP	GO:0007163	establishment or maintenance of cell polarity	19/442	96/5658	0.00012268	0.00100746	0.000600551	HSP90AA1/CFL1/HES5/CTNNA1/GSN/MSN/LAMA1/KANK1/RAP1B/OPHN1/MYO18A/PARD3/AQP1/EPHB1/LHX2/DLG1/MAP7/SIPA1L3/RICTOR	19
BP	GO:0048708	astrocyte differentiation	13/442	52/5658	0.000127204	0.00104251	0.000621442	MT3/ID2/HES5/LRP1/DAB1/SERPINE2/SOX9/STAT3/GPR37L1/S100B/IL6ST/ID4/NR1D1	13
BP	GO:0050796	regulation of insulin secretion	14/442	59/5658	0.000129374	0.00105603	0.000629504	GJA1/PRKCA/GLUL/MAP4K4/TCF7L2/CD38/ITPR2/LRP1/ADCY8/HIF1A/NR1D1/HMGN3/TIAM1/SRI	14
BP	GO:1990138	neuron projection extension	14/442	59/5658	0.000129374	0.00105603	0.000629504	APOE/HSP90AA1/MT3/SEMA5A/LRP1/NRP1/FN1/SEMA3E/DNM2/DSCAM/SYT1/LHX2/TIAM1/IQGAP1	14
CC	GO:0012506	vesicle membrane	44/441	334/5894	0.000125249	0.00106585	0.000687642	APOE/TFRC/CAMK2G/CD38/ITPR2/LRP1/TF/CPE/TMBIM1/TNK2/B2M/CD63/PSAP/CD9/PTPRJ/DNM2/BST2/LGALS3/UBB/RPS27A/SYT1/RAP1B/ADCY8/ADAM10/HIP1R/WLS/ABCC4/GPRC5B/ITGAV/ATP6V0E1/UBC/ARHGAP21/HIP1/APPL2/STK10/IQGAP1/PKD2/SRI/AP3B1/ARFGAP3/PTCH1/HSPA8/EPN2/HLA-E	44
BP	GO:0032103	positive regulation of response to external stimulus	28/442	172/5658	0.000133395	0.00107376	0.000640071	HSPB1/TMSB4X/PRKCA/PDGFRB/SEMA5A/PTN/AGT/LRP1/NEAT1/CXCL14/F3/FGF2/TUBB2B/CDH13/NRP1/DSCAM/IL33/ADAM10/IL6ST/GPRC5B/SASH1/ADORA2B/IL6R/S1PR1/TIAM1/FGFR1/DDT/HLA-E	28
BP	GO:0009306	protein secretion	36/442	245/5658	0.000136472	0.00108908	0.000649203	APOE/GJA1/TMSB4X/PRKCA/GLUL/CAMK2G/CADM1/MAP4K4/TCF7L2/CD38/AGT/ITPR2/LRP1/CHI3L1/PPIA/FN1/PML/TGFB2/IL33/ANGPT1/MBP/MYO18A/ADCY8/RBPJ/ABCA1/WLS/HIF1A/ITGAV/NR1D1/HMGN3/C5/TIAM1/TGFB3/SRI/ARFGAP3/HLA-E	36
BP	GO:0045844	positive regulation of striated muscle tissue development	10/442	33/5658	0.000137173	0.00108908	0.000649203	FGFR2/GJA1/BMPR1A/FGF2/RBPJ/NRG1/YAP1/MEF2C/FGFR1/TGFBR3	10
BP	GO:0048636	positive regulation of muscle organ development	10/442	33/5658	0.000137173	0.00108908	0.000649203	FGFR2/GJA1/BMPR1A/FGF2/RBPJ/NRG1/YAP1/MEF2C/FGFR1/TGFBR3	10
BP	GO:0055021	regulation of cardiac muscle tissue growth	10/442	33/5658	0.000137173	0.00108908	0.000649203	FGFR2/GJA1/BMPR1A/FGF2/JARID2/RBPJ/YAP1/MEF2C/FGFR1/TGFBR3	10
BP	GO:0009743	response to carbohydrate	18/442	89/5658	0.000138038	0.00109381	0.000652023	GJA1/GLUL/MAP4K4/TCF7L2/ZFP36L1/LRP1/EGR1/RAP1B/ADCY8/PPARGC1A/HIF1A/NR1D1/HMGN3/NAMPT/TXNIP/TIAM1/SRI/COL4A3	18
MF	GO:0019887	protein kinase regulator activity	16/438	71/5628	8.0501e-05	0.0011161	0.000791131	HSPB1/MT3/APC/STK3/TAOK3/CCND3/CCNY/SOCS3/ABI1/NRG1/GPRC5B/CAMK2N1/RPLP1/KAT2B/IQGAP1/NRG3	16
MF	GO:0060089	molecular transducer activity	61/438	486/5628	8.19155e-05	0.0011161	0.000791131	GPC6/FGFR2/PTPRD/NR4A3/PTPRZ1/PDGFRB/NRXN3/GABRB1/NR4A2/NLGN1/AKAP13/BMPR1B/LRP1/BMPR1A/ANTXR1/NR4A1/EPHA6/CNTFR/F3/CCND3/GABRG1/LTBP1/PRKG1/NLGN4X/NRP1/MCC/FAS/GFRA1/PRNP/EFEMP1/SLC20A2/FGFR3/RAMP1/NEO1/PTPRG/SORL1/GPR37L1/PTPRT/IL6ST/EPHB1/DDR2/ITGB8/NRXN1/ABCA1/GPRC5B/ITGAV/MERTK/PTPRM/SDC4/ADORA2B/NR1D1/IL6R/S1PR1/FGFR1/CTSH/AR/ADORA1/TGFBR3/PTCH1/NR1H2/GHR	61
BP	GO:0048017	inositol lipid-mediated signaling	19/442	97/5658	0.00014177	0.00111879	0.000666916	PDGFRB/PREX2/AGT/ZFP36L1/GAB2/FYN/SERPINE2/SOX9/PIK3C2A/GAB1/GSN/TGFB2/ANGPT1/TSC2/PLCE1/STAMBP/FGFR1/PDGFC/HGF	19
BP	GO:0000187	activation of MAPK activity	16/442	74/5658	0.000142258	0.00111879	0.000666916	MAP3K5/FGF2/UBB/RPS27A/FGF1/SPAG9/PLCE1/NRG1/UBC/ADORA2B/C5/TGFB3/FRS2/TAB2/HGF/GHR	16
BP	GO:0019827	stem cell population maintenance	16/442	74/5658	0.000142258	0.00111879	0.000666916	PTN/HES5/BMPR1A/PRDM16/FGF2/SOX9/PRRX1/TET1/STAT3/FOXO1/RBPJ/CDC73/YAP1/POLR2L/POLR2J/ARID1A	16
BP	GO:0031330	negative regulation of cellular catabolic process	20/442	105/5658	0.000142567	0.00111879	0.000666916	MT3/GABARAPL2/ZFP36/TOB1/WDR6/PML/SMARCC1/STAT3/OPHN1/SORL1/TSC2/RGN/PPARGC1A/HIPK2/ATP2B4/DDIT4/HNRNPD/NAMPT/TAB2/HGF	20
BP	GO:0045637	regulation of myeloid cell differentiation	20/442	105/5658	0.000142567	0.00111879	0.000666916	HSPA1A/HSPA1B/ID2/FOS/PRKCA/NR4A3/TOB2/ZFP36L1/MEIS2/ZFP36/B2M/JUN/LGALS3/STAT3/UBASH3B/CDC73/MEF2C/HIF1A/STAT1/KAT2B	20
BP	GO:0014706	striated muscle tissue development	28/442	173/5658	0.000147807	0.00115768	0.000690098	ID2/FGFR2/GJA1/FOS/PDGFRB/AGT/AKAP13/BMPR1A/FGF2/DDX5/TGFB2/EGR1/S100B/JARID2/RBPJ/EPHB1/NRG1/YAP1/ELN/MEF2C/ADAMTS9/S1PR1/MEGF10/FGFR1/FRS2/TGFBR3/ARID1A/CFLAR	28
BP	GO:0008543	fibroblast growth factor receptor signaling pathway	12/442	46/5658	0.000148839	0.00115906	0.000690919	FGFR2/FGF2/SULF1/HNRNPM/FGFR3/FGF1/FGF12/POLR2L/POLR2J/IQGAP1/FGFR1/FRS2	12
BP	GO:0055024	regulation of cardiac muscle tissue development	12/442	46/5658	0.000148839	0.00115906	0.000690919	FGFR2/GJA1/BMPR1A/FGF2/JARID2/RBPJ/NRG1/YAP1/MEF2C/FGFR1/FRS2/TGFBR3	12
BP	GO:0110020	regulation of actomyosin structure organization	12/442	46/5658	0.000148839	0.00115906	0.000690919	STMN1/DLC1/ARHGEF10/AKAP13/NRP1/WASF2/MEF2C/SDC4/SH3PXD2B/S1PR1/TGFB3/ARHGEF10L	12
BP	GO:0001659	temperature homeostasis	17/442	82/5658	0.000153477	0.00119289	0.000711086	GJA1/APC/ALDH1A1/PRDM16/ZNF423/SLC27A1/STAT3/EGR1/FOXO1/RBPJ/PPARGC1A/ID1/NR1D1/APPL2/PDGFC/ADORA1/NR1H2	17
MF	GO:1990782	protein tyrosine kinase binding	12/438	44/5628	8.97761e-05	0.00119337	0.000845901	HSP90AA1/GJA1/DOCK4/GAB2/TOB1/DSCAM/ANGPT1/NRG1/NEDD9/TIAM1/FRS2/NRG3	12
BP	GO:2001252	positive regulation of chromosome organization	13/442	53/5658	0.000156794	0.00121172	0.000722312	HMBOX1/HNRNPA2B1/WBP2/PML/TPR/TET1/RPS6KA5/JARID2/PPARGC1A/ATM/HNRNPD/BCL6/NEK7	13
BP	GO:0051223	regulation of protein transport	38/442	266/5658	0.000162702	0.001255	0.000748109	APOE/GJA1/TMSB4X/PRKCA/APOD/GLUL/CADM1/MAP4K4/TCF7L2/CD38/SLC7A11/ITPR2/LRP1/PPIA/FYN/FN1/PML/TPR/PRNP/TGFB2/IL33/ANGPT1/MBP/SORL1/MYO18A/ADCY8/WLS/HIF1A/NR1D1/HMGN3/C5/VPS28/YWHAE/TIAM1/TGFB3/SRI/HSPA8/HLA-E	38
BP	GO:0009746	response to hexose	16/442	75/5658	0.000168117	0.00128943	0.000768631	GJA1/GLUL/MAP4K4/TCF7L2/LRP1/EGR1/ADCY8/PPARGC1A/HIF1A/NR1D1/HMGN3/NAMPT/TXNIP/TIAM1/SRI/COL4A3	16
BP	GO:0051054	positive regulation of DNA metabolic process	16/442	75/5658	0.000168117	0.00128943	0.000768631	HSP90AA1/TFRC/PDGFRB/HMBOX1/HNRNPA2B1/FGF2/GLI2/PML/JUN/FUS/PPARGC1A/ATM/HNRNPD/FGFR1/NEK7/HGF	16
BP	GO:0007259	JAK-STAT cascade	15/442	68/5658	0.000180689	0.00136748	0.000815161	AGT/HES5/CCL2/FYN/DAB1/FGFR3/STAT3/SOCS3/IL6ST/STAT1/STAMBP/IL6R/STAT2/PKD2/GHR	15
BP	GO:0072175	epithelial tube formation	15/442	68/5658	0.000180689	0.00136748	0.000815161	FGFR2/DLC1/CFL1/STK3/HES5/PHACTR4/SOX9/TGFB2/TSC2/LHX2/HIF1A/SDC4/TULP3/PTCH1/ARID1A	15
BP	GO:0035272	exocrine system development	10/442	34/5658	0.000180985	0.00136748	0.000815161	FGFR2/NRP1/SOX9/LAMA1/TGFB2/WLS/NFIB/TGFB3/FGFR1/HGF	10
BP	GO:0048645	animal organ formation	10/442	34/5658	0.000180985	0.00136748	0.000815161	FGFR2/BMPR1A/GLI2/SULF1/FGF1/RBPJ/MEF2C/FGFR1/FRS2/AR	10
BP	GO:0060420	regulation of heart growth	10/442	34/5658	0.000180985	0.00136748	0.000815161	FGFR2/GJA1/BMPR1A/FGF2/JARID2/RBPJ/YAP1/MEF2C/FGFR1/TGFBR3	10
BP	GO:0043620	regulation of DNA-templated transcription in response to stress	12/442	47/5658	0.000185996	0.00140199	0.000835732	HSPA1A/MT3/DNAJB1/JUN/UBB/RPS27A/EGR1/EGLN3/RBPJ/HIF1A/UBC/HSPA5	12
BP	GO:0045927	positive regulation of growth	20/442	107/5658	0.000186588	0.00140199	0.000835732	FGFR2/SEMA5A/CD38/LRP1/BMPR1A/FGF2/NRP1/FN1/DSCAM/TGFB2/SYT1/ADAM10/RBPJ/LGI1/YAP1/MEF2C/SH3PXD2B/FGFR1/TGFBR3/GHR	20
BP	GO:0048738	cardiac muscle tissue development	20/442	107/5658	0.000186588	0.00140199	0.000835732	ID2/FGFR2/GJA1/PDGFRB/AGT/AKAP13/BMPR1A/FGF2/TGFB2/JARID2/RBPJ/NRG1/YAP1/MEF2C/ADAMTS9/S1PR1/FGFR1/FRS2/TGFBR3/ARID1A	20
BP	GO:0007229	integrin-mediated signaling pathway	14/442	61/5658	0.000189445	0.00142084	0.000846965	PTN/DOCK1/LIMS1/PHACTR4/CTNNA1/VAV3/NRP1/CD63/FUT8/ADAM10/ITGA6/ITGB8/ITGAV/NEDD9	14
BP	GO:0043401	steroid hormone mediated signaling pathway	16/442	76/5658	0.000197975	0.00147935	0.000881846	NR4A3/NR4A2/AKAP13/NR4A1/NCOR2/WBP2/DDX5/NCOA6/PPARGC1A/YAP1/TADA3/NR1D1/PRMT2/AR/NR1H2/ARID1A	16
BP	GO:0098727	maintenance of cell number	16/442	76/5658	0.000197975	0.00147935	0.000881846	PTN/HES5/BMPR1A/PRDM16/FGF2/SOX9/PRRX1/TET1/STAT3/FOXO1/RBPJ/CDC73/YAP1/POLR2L/POLR2J/ARID1A	16
BP	GO:0030500	regulation of bone mineralization	11/442	41/5658	0.000214134	0.00158675	0.000945867	GJA1/PTN/BMPR1B/BMPR1A/SOX9/DDR2/MEF2C/HIF1A/S1PR1/TGFB3/FBN2	11
BP	GO:0032409	regulation of transporter activity	18/442	92/5658	0.000214674	0.00158675	0.000945867	GJA1/TMSB4X/NLGN1/MINK1/CCL2/S100A1/DNM2/PRNP/ACTB/FGF12/RGN/PPARGC1A/MEF2C/DLG1/YWHAE/UTRN/PKD2/SRI	18
BP	GO:0006367	transcription initiation from RNA polymerase II promoter	15/442	69/5658	0.00021469	0.00158675	0.000945867	NR4A3/NR4A2/MAML2/NR4A1/SOX9/RBPJ/PPARGC1A/YAP1/WWTR1/NR1D1/POLR2L/POLR2J/KAT2B/AR/NR1H2	15
BP	GO:0030073	insulin secretion	15/442	69/5658	0.00021469	0.00158675	0.000945867	GJA1/PRKCA/GLUL/CAMK2G/MAP4K4/TCF7L2/CD38/ITPR2/LRP1/ADCY8/HIF1A/NR1D1/HMGN3/TIAM1/SRI	15
BP	GO:0042542	response to hydrogen peroxide	15/442	69/5658	0.00021469	0.00158675	0.000945867	NR4A3/PDGFRB/MAP3K5/FYN/DUSP1/JUN/PSAP/GPR37L1/AQP1/FOXO1/STAT1/GNAO1/TXNIP/CAPN2/HGF	15
BP	GO:0045667	regulation of osteoblast differentiation	15/442	69/5658	0.00021469	0.00158675	0.000945867	ID2/FGFR2/BMPR1B/BMPR1A/JUND/TOB1/DDX5/IL6ST/DDR2/ID1/MEF2C/IL6R/FBN2/HGF/PTCH1	15
BP	GO:0002684	positive regulation of immune system process	60/442	491/5658	0.000224934	0.00164453	0.000980308	HSPA1A/HSP90AA1/HSPA1B/ID2/FOS/PRKCA/CLU/TFRC/NR4A3/CADM1/PLSCR1/PTN/CD38/DOCK1/ZFP36L1/ACTG1/GAB2/CCL2/CXCL14/FYN/GLI2/ZMIZ1/VAV3/B2M/S100A1/JUN/ITCH/PTPRJ/PRNP/LGALS3/TGFB2/IL33/MYO10/UBB/RPS27A/STAT3/WASF2/ACTB/MYO18A/RPS6KA5/SEC14L1/ADAM10/ABI1/IL6ST/GPRC5B/MEF2C/HIF1A/UBC/ADORA2B/STAT1/VAV2/NR1D1/APPL2/C5/IL6R/BCL6/TAB2/AP3B1/BIRC2/HLA-E	60
BP	GO:0043280	positive regulation of cysteine-type endopeptidase activity involved in apoptotic process	14/442	62/5658	0.000227592	0.00165503	0.000986568	CCK/DLC1/MAP3K5/F3/PML/FAS/GSN/EGLN3/CRADD/HIP1R/HIP1/ST18/CTSH/COL4A3	14
BP	GO:0072009	nephron epithelium development	14/442	62/5658	0.000227592	0.00165503	0.000986568	MYO1E/AGT/HES5/FGF2/SOX9/FGF1/YAP1/MEF2C/WWTR1/STAT1/DLG1/IQGAP1/PKD2/PTCH1	14
BP	GO:1904019	epithelial cell apoptotic process	14/442	62/5658	0.000227592	0.00165503	0.000986568	SEMA5A/TCF7L2/STK3/ZFP36L1/ZFP36/CCL2/MAP3K5/GSN/SRSF6/ANGPT1/PPARGC1A/CAST/COL4A3/CFLAR	14
BP	GO:0030038	contractile actin filament bundle assembly	12/442	48/5658	0.000230788	0.00166339	0.000991554	STMN1/DLC1/ARHGEF10/NRP1/WASF2/SORBS1/ELN/SDC4/SH3PXD2B/S1PR1/TGFB3/ARHGEF10L	12
BP	GO:0043149	stress fiber assembly	12/442	48/5658	0.000230788	0.00166339	0.000991554	STMN1/DLC1/ARHGEF10/NRP1/WASF2/SORBS1/ELN/SDC4/SH3PXD2B/S1PR1/TGFB3/ARHGEF10L	12
BP	GO:0051591	response to cAMP	12/442	48/5658	0.000230788	0.00166339	0.000991554	FOS/ZFP36L1/ITPR2/JUND/DUSP1/JUN/RAP1B/AQP1/STAT1/HSPA5/PKD2/BIRC2	12
BP	GO:1901216	positive regulation of neuron death	12/442	48/5658	0.000230788	0.00166339	0.000991554	FOS/CLU/MAP3K5/FYN/JUN/PRNP/TGFB2/EGR1/ATM/DDIT4/CAPN2/ADORA1	12
BP	GO:1901888	regulation of cell junction assembly	12/442	48/5658	0.000230788	0.00166339	0.000991554	GJA1/APOD/MAP4K4/DLC1/AGT/LIMS1/LRP1/NRP1/PTPRJ/RAP1B/SDC4/IQGAP1	12
BP	GO:0034614	cellular response to reactive oxygen species	16/442	77/5658	0.000232336	0.00166725	0.000993851	MT3/FOS/NR4A3/MAP3K5/JUN/PSAP/DNM2/GPR37L1/RGN/AQP1/FOXO1/HNRNPD/PKD2/HGF/CFLAR/PRDX1	16
BP	GO:0030218	erythrocyte differentiation	13/442	55/5658	0.000234055	0.00166725	0.000993851	HSPA1A/HSPA1B/ID2/ZFP36L1/ZFP36/B2M/STAT3/HIF1A/HIPK2/RPS6/STAT1/BCL6/TGFBR3	13
BP	GO:0030901	midbrain development	10/442	35/5658	0.000235993	0.00167419	0.000997992	FGFR2/NR4A2/S100A1/MBP/ACTB/NDRG2/WLS/HSPA5/YWHAE/FGFR1	10
BP	GO:0048562	embryonic organ morphogenesis	23/442	134/5658	0.000238605	0.00168977	0.00100728	ID2/FGFR2/GJA1/NR4A3/GLI2/PHACTR4/SOX9/PRRX1/ZEB1/EFEMP1/YAP1/MEF2C/HIF1A/HIPK2/DLG1/CHST11/TGFB3/FGFR1/TULP3/FRS2/PKD2/FBN2/ARID1A	23
BP	GO:0097435	supramolecular fiber organization	41/442	300/5658	0.000240112	0.00169749	0.00101188	HSPA1A/APOE/HSPA1B/TMSB4X/STMN1/CLU/APC/PDGFRB/SEMA5A/DLC1/CFL1/ARHGEF10/AKAP13/ACTG1/PREX1/NRP1/B2M/GSN/TGFB2/KANK1/WASF2/ABI1/HIP1R/SORBS1/DDR2/ID1/ELN/MEF2C/NEDD9/SDC4/DLG1/HIP1/SH3PXD2B/S1PR1/ARHGAP17/DIAPH2/RICTOR/TGFB3/ARHGEF10L/HSPA8/CFLAR	41
BP	GO:0050803	regulation of synapse structure or activity	17/442	85/5658	0.000242936	0.00170352	0.00101547	APOE/PTPRD/PTN/CFL1/NLGN1/IL1RAPL1/SLC7A11/FYN/TUBA1A/DNM2/PRNP/ADAM10/EPHB1/NRXN1/MEF2C/DNM3/TIAM1	17
BP	GO:0090087	regulation of peptide transport	39/442	281/5658	0.000247398	0.00172804	0.00103009	APOE/GJA1/TMSB4X/PRKCA/APOD/GLUL/CADM1/MAP4K4/TCF7L2/CD38/SLC7A11/ITPR2/LRP1/PPIA/FYN/FN1/PML/TPR/PRNP/TGFB2/IL33/ANGPT1/MBP/SORL1/MYO18A/ADCY8/WLS/HIF1A/NR1D1/HMGN3/C5/VPS28/YWHAE/TIAM1/TGFB3/SRI/ADORA1/HSPA8/HLA-E	39
BP	GO:0031099	regeneration	18/442	93/5658	0.000247409	0.00172804	0.00103009	GJA1/APOD/NR4A3/MAP4K4/PTN/TNC/LRP1/CTNNA1/PRRX1/JUN/CD9/GSN/RGN/YAP1/HGF/TGFBR3/PTCH1/CFLAR	18
BP	GO:0003013	circulatory system process	34/442	234/5658	0.000260804	0.00180916	0.00107845	APOE/ID2/GJA1/DOCK4/CD38/AGT/ITPR2/AKAP13/FYN/PRKG1/PIK3C2A/S100A1/PTPRJ/TGFB2/ANGPT1/FGF12/GPR37L1/YAP1/ELN/PTPRM/WWTR1/ATP2B4/ADORA2B/STAT1/DLG1/GNAO1/NAMPT/YWHAE/ASPH/SRI/DOCK5/AR/ADORA1/COL4A3	34
BP	GO:0010638	positive regulation of organelle organization	34/442	234/5658	0.000260804	0.00180916	0.00107845	HSPA1A/HSPA1B/PDGFRB/SEMA5A/CFL1/ARHGEF10/HMBOX1/HNRNPA2B1/PHIP/NRP1/WBP2/PML/TPR/GSN/MSN/TET1/SYT1/RPS6KA5/JARID2/HIP1R/PPARGC1A/ID1/HIF1A/SDC4/ATM/DLG1/HNRNPD/SH3PXD2B/BCL6/YWHAE/RICTOR/TGFB3/ARHGEF10L/NEK7	34
BP	GO:0009896	positive regulation of catabolic process	27/442	170/5658	0.000266578	0.00184607	0.00110045	HSPA1A/APOE/HSP90AA1/HSPA1B/GJA1/CLU/APC/ZFP36L1/LRP1/SMURF2/ZFP36/TOB1/SOX9/ITCH/MSN/IL33/CSNK1A1/SORL1/TSC2/RGN/FOXO1/HIF1A/ATM/HNRNPD/VPS28/EPM2A/ADORA1	27
BP	GO:0006919	activation of cysteine-type endopeptidase activity involved in apoptotic process	11/442	42/5658	0.000270096	0.00186408	0.00111118	CCK/DLC1/F3/PML/FAS/EGLN3/CRADD/HIP1R/HIP1/CTSH/COL4A3	11
BP	GO:0022037	metencephalon development	11/442	42/5658	0.000270096	0.00186408	0.00111118	PTN/GLI2/NLGN4X/DAB1/SERPINE2/PTBP2/OPHN1/PPARGC1A/HSPA5/HNRNPD/MYO16	11
BP	GO:0014065	phosphatidylinositol 3-kinase signaling	16/442	78/5658	0.000271752	0.00186571	0.00111215	PDGFRB/PREX2/AGT/ZFP36L1/FYN/SERPINE2/SOX9/PIK3C2A/GAB1/TGFB2/ANGPT1/TSC2/STAMBP/FGFR1/PDGFC/HGF	16
BP	GO:0034284	response to monosaccharide	16/442	78/5658	0.000271752	0.00186571	0.00111215	GJA1/GLUL/MAP4K4/TCF7L2/LRP1/EGR1/ADCY8/PPARGC1A/HIF1A/NR1D1/HMGN3/NAMPT/TXNIP/TIAM1/SRI/COL4A3	16
BP	GO:0006518	peptide metabolic process	37/442	263/5658	0.000271863	0.00186571	0.00111215	APOE/HSPB1/HSP90AA1/RPS15/CLU/SLC7A11/ZFP36L1/ZFP36/RPL18/CPE/RPL8/TOB1/RPS25/TPR/PRNP/RPS27A/RPL28/STAT3/RPL10/RPL23A/SORL1/RPL37/ADAM10/RPLP2/RPS24/RPS6/RPL19/HNRNPD/RPS12/RPLP1/RPL12/SPON1/CTSH/RPL37A/RPS9/HSPA8/RPL31	37
BP	GO:0001838	embryonic epithelial tube formation	14/442	63/5658	0.000272168	0.00186571	0.00111215	DLC1/CFL1/STK3/HES5/PHACTR4/SOX9/TGFB2/TSC2/LHX2/HIF1A/SDC4/TULP3/PTCH1/ARID1A	14
CC	GO:0072562	blood microparticle	13/441	57/5894	0.000224044	0.00186691	0.00120446	HSPA1A/APOE/HSPA1B/CLU/TFRC/AGT/ACTG1/TF/FN1/GSN/MSN/ACTB/HSPA8	13
BP	GO:0050890	cognition	20/442	110/5658	0.000275005	0.00188198	0.00112185	APOE/FOS/PTPRZ1/NRXN3/CCK/PTN/AGT/SLC7A11/MEIS2/FYN/NLGN4X/B2M/JUN/PRNP/ADCY8/S100B/NRXN1/MEF2C/HIF1A/ADORA1	20
BP	GO:0060840	artery development	13/442	56/5658	0.000283589	0.00193746	0.00115493	APOE/PDGFRB/LRP1/BMPR1A/LTBP1/ZMIZ1/NRP1/PRRX1/DNM2/TGFB2/RBPJ/ADAMTS9/PKD2	13
CC	GO:0097060	synaptic membrane	24/441	149/5894	0.000249294	0.00196715	0.00126913	GABRB1/NLGN1/IL1RAPL1/MINK1/CPE/GABRG1/NLGN4X/NRP1/CASK/DNM2/SYT1/ADCY8/ADAM10/ABI1/HIP1R/NRXN1/CAMK2N1/ATP2B4/DLG1/HIP1/DNM3/TIAM1/UTRN/ADORA1	24
CC	GO:0001726	ruffle	17/441	89/5894	0.000260066	0.00201551	0.00130033	APC/DLC1/CFL1/PTPRJ/DNM2/GSN/MYO10/KANK1/WASF2/S100B/HIP1R/KSR1/ITGAV/S100A6/APPL2/TIAM1/IQGAP1	17
BP	GO:0002040	sprouting angiogenesis	15/442	71/5658	0.000299568	0.00204319	0.00121795	GLUL/SEMA5A/NR4A1/FGF2/CDH13/NRP1/PIK3C2A/S100A1/SEMA3E/FGF1/RNF213/ANGPT1/ADAMTS9/JAK1/EPN2	15
MF	GO:0038023	signaling receptor activity	58/438	466/5628	0.000157816	0.00204785	0.00145159	GPC6/FGFR2/PTPRD/NR4A3/PTPRZ1/PDGFRB/NRXN3/GABRB1/NR4A2/NLGN1/BMPR1B/LRP1/BMPR1A/ANTXR1/NR4A1/EPHA6/CNTFR/F3/GABRG1/LTBP1/NLGN4X/NRP1/MCC/FAS/GFRA1/PRNP/EFEMP1/SLC20A2/FGFR3/RAMP1/NEO1/PTPRG/SORL1/GPR37L1/PTPRT/IL6ST/EPHB1/DDR2/ITGB8/NRXN1/ABCA1/GPRC5B/ITGAV/MERTK/PTPRM/SDC4/ADORA2B/NR1D1/IL6R/S1PR1/FGFR1/CTSH/AR/ADORA1/TGFBR3/PTCH1/NR1H2/GHR	58
BP	GO:0010038	response to metal ion	24/442	145/5658	0.000309932	0.00211034	0.00125798	MT3/ID2/FOS/NLGN1/TF/JUND/DUSP1/B2M/JUN/FUS/GSN/PRNP/NDRG1/SYT1/ADCY8/AQP1/PPARGC1A/MEF2C/HIF1A/HSPA5/HNRNPD/TXNIP/IQGAP1/PKD2	24
BP	GO:0098609	cell-cell adhesion	52/442	414/5658	0.000311616	0.00211342	0.00125981	HSPB1/PRKCA/PTPRD/TFRC/NR4A3/NRXN3/CADM1/NLGN1/IL1RAPL1/LIMS1/SLC7A11/ZFP36L1/ACTG1/MINK1/CCL2/FYN/GLI2/ZMIZ1/PRKG1/NLGN4X/CTNNA1/CDH13/DAB1/SERPINE2/SOX9/CD9/MSN/PRNP/DSCAM/LGALS3/TGFB2/MYO10/DTX1/MBP/UBASH3B/ACTB/PTPRT/IL6ST/ITGA6/NRXN1/ITGAV/PTPRM/SDC4/DLG1/IGSF11/IL6R/BCL6/MEGF10/STK10/AP3B1/ADAMTS18/HLA-E	52
BP	GO:0030010	establishment of cell polarity	14/442	64/5658	0.000324038	0.00217362	0.0012957	HSP90AA1/CFL1/HES5/GSN/MSN/LAMA1/KANK1/RAP1B/OPHN1/MYO18A/PARD3/EPHB1/SIPA1L3/RICTOR	14
BP	GO:0030282	bone mineralization	13/442	57/5658	0.000341805	0.00228903	0.0013645	FGFR2/GJA1/PTN/BMPR1B/BMPR1A/SOX9/FGFR3/DDR2/MEF2C/HIF1A/S1PR1/TGFB3/FBN2	13
BP	GO:0007612	learning	12/442	50/5658	0.000348327	0.00231743	0.00138143	FOS/NRXN3/CCK/PTN/AGT/SLC7A11/MEIS2/FYN/NLGN4X/JUN/NRXN1/HIF1A	12
BP	GO:0030326	embryonic limb morphogenesis	12/442	50/5658	0.000348327	0.00231743	0.00138143	GJA1/BMPR1A/GLI2/PRRX1/TGFB2/INTU/CHST11/GNA12/FGFR1/TULP3/FBN2/PTCH1	12
BP	GO:0035113	embryonic appendage morphogenesis	12/442	50/5658	0.000348327	0.00231743	0.00138143	GJA1/BMPR1A/GLI2/PRRX1/TGFB2/INTU/CHST11/GNA12/FGFR1/TULP3/FBN2/PTCH1	12
BP	GO:0110110	positive regulation of animal organ morphogenesis	12/442	50/5658	0.000348327	0.00231743	0.00138143	FGFR2/PTN/AGT/SOX9/TGFB2/FGF1/SRSF6/RBPJ/FGFR1/FRS2/AR/CFLAR	12
BP	GO:0070201	regulation of establishment of protein localization	38/442	276/5658	0.000350333	0.00232478	0.00138581	APOE/GJA1/TMSB4X/PRKCA/APOD/GLUL/CADM1/MAP4K4/TCF7L2/CD38/SLC7A11/ITPR2/LRP1/PPIA/FYN/FN1/PML/TPR/PRNP/TGFB2/IL33/ANGPT1/MBP/SORL1/MYO18A/ADCY8/WLS/HIF1A/NR1D1/HMGN3/C5/VPS28/YWHAE/TIAM1/TGFB3/SRI/HSPA8/HLA-E	38
BP	GO:0050708	regulation of protein secretion	29/442	191/5658	0.000350576	0.00232478	0.00138581	APOE/GJA1/TMSB4X/PRKCA/GLUL/CADM1/MAP4K4/TCF7L2/CD38/ITPR2/LRP1/PPIA/FN1/PML/TGFB2/IL33/ANGPT1/MBP/MYO18A/ADCY8/WLS/HIF1A/NR1D1/HMGN3/C5/TIAM1/TGFB3/SRI/HLA-E	29
BP	GO:0062012	regulation of small molecule metabolic process	25/442	155/5658	0.00035181	0.00232591	0.00138648	APOE/TMSB4X/NR4A3/ENO1/SLC7A11/SQLE/NCOR2/TPR/STAT3/FGF1/EGR1/RGN/FOXO1/SORBS1/PPARGC1A/HIF1A/ATP2B4/ADORA2B/DDIT4/NR1D1/APPL2/NUP160/KAT2B/NCOA2/NR1H2	25
BP	GO:0009749	response to glucose	15/442	72/5658	0.000351891	0.00232591	0.00138648	GJA1/GLUL/MAP4K4/TCF7L2/LRP1/EGR1/ADCY8/PPARGC1A/HIF1A/NR1D1/HMGN3/TXNIP/TIAM1/SRI/COL4A3	15
BP	GO:0060070	canonical Wnt signaling pathway	23/442	138/5658	0.000371782	0.00244309	0.00145633	APOE/FGFR2/APC/SEMA5A/TCF7L2/NR4A2/STK3/SMURF2/GPC5/SOX9/MCC/KANK1/CCNY/EGR1/CSNK1A1/FOXO1/RBPJ/WLS/YAP1/GPRC5B/ZNRF3/WWTR1/TBL1X	23
BP	GO:1902905	positive regulation of supramolecular fiber organization	17/442	88/5658	0.000374682	0.00245263	0.00146202	HSPA1A/APOE/HSPA1B/CLU/SEMA5A/CFL1/ARHGEF10/NRP1/GSN/HIP1R/ID1/SDC4/DLG1/SH3PXD2B/RICTOR/TGFB3/ARHGEF10L	17
BP	GO:2000027	regulation of animal organ morphogenesis	21/442	121/5658	0.000378458	0.00247337	0.00147438	GPC6/FGFR2/PTN/AGT/SMURF2/BMPR1A/SULF1/SOX9/TGFB2/FGF1/SRSF6/RBPJ/ZNRF3/STAT1/NFIB/TIAM1/FGFR1/FRS2/HGF/AR/CFLAR	21
BP	GO:0045861	negative regulation of proteolysis	24/442	147/5658	0.000382508	0.00249451	0.00148699	MT3/PEBP1/AGT/GABARAPL2/SERPINE2/PML/PRNP/BST2/SMARCC1/OPHN1/SORL1/WFDC1/AQP1/SH3RF1/CAMK2N1/HIPK2/C5/YWHAE/IFI6/BIRC2/HGF/CAST/COL4A3/CFLAR	24
BP	GO:0060041	retina development in camera-type eye	14/442	65/5658	0.000384149	0.00249451	0.00148699	PDGFRB/PTN/BMPR1B/NRP1/SOX9/LAMA1/DSCAM/TGFB2/LHX2/HIF1A/HIPK2/MERTK/PTPRM/ATP2B4	14
BP	GO:0003300	cardiac muscle hypertrophy	10/442	37/5658	0.000388497	0.00250673	0.00149427	PRKCA/NR4A3/AGT/AKAP13/JARID2/FOXO1/IL6ST/MEF2C/ATP2B4/TIAM1	10
BP	GO:0007045	cell-substrate adherens junction assembly	10/442	37/5658	0.000388497	0.00250673	0.00149427	APOD/MAP4K4/DLC1/LIMS1/LRP1/NRP1/PTPRJ/SORBS1/SDC4/IQGAP1	10
BP	GO:0048041	focal adhesion assembly	10/442	37/5658	0.000388497	0.00250673	0.00149427	APOD/MAP4K4/DLC1/LIMS1/LRP1/NRP1/PTPRJ/SORBS1/SDC4/IQGAP1	10
BP	GO:0070527	platelet aggregation	10/442	37/5658	0.000388497	0.00250673	0.00149427	HSPB1/PRKCA/SLC7A11/ACTG1/PRKG1/SERPINE2/CD9/UBASH3B/ACTB/ADAMTS18	10
BP	GO:0051052	regulation of DNA metabolic process	22/442	130/5658	0.000398787	0.00256905	0.00153142	HSP90AA1/GJA1/TFRC/PDGFRB/HMBOX1/HNRNPA2B1/FGF2/GLI2/DUSP1/PML/JUN/FUS/TET1/RGN/PPARGC1A/ATM/DACH1/HNRNPD/BCL6/FGFR1/NEK7/HGF	22
BP	GO:1903706	regulation of hemopoiesis	31/442	211/5658	0.000399597	0.00257019	0.0015321	HSPA1A/HSPA1B/ID2/FOS/PRKCA/NR4A3/PTN/TOB2/ZFP36L1/MEIS2/HES5/ZFP36/GLI2/ZMIZ1/B2M/JUN/ITCH/ZEB1/LGALS3/DTX1/STAT3/UBASH3B/CDC73/SH3RF1/YAP1/MEF2C/HIF1A/STAT1/BCL6/KAT2B/AP3B1	31
BP	GO:0034446	substrate adhesion-dependent cell spreading	13/442	58/5658	0.000409898	0.00263228	0.00156911	DOCK1/LIMS1/ANTXR1/PREX1/NRP1/FN1/DNM2/KANK1/ITGAV/NEDD9/MERTK/DOCK5/FBLN1	13
MF	GO:0008092	cytoskeletal protein binding	49/438	379/5628	0.000213842	0.0026478	0.00187686	APOE/HSP90AA1/GJA1/TMSB4X/STMN1/CLU/APC/MAP4K4/CFL1/ARHGEF10/MYO1E/GABARAPL2/ANTXR1/FYN/PHACTR4/CTNNA1/CDH13/TPR/DNM2/FUS/GSN/MSN/PRNP/MYO10/NDRG1/WASF2/OPHN1/ACTB/MYO18A/SPAG9/ADCY8/S100B/ABI1/HIP1R/SORBS1/PPARGC1A/S100A6/DLG1/HIP1/FRMD5/DNM3/DIAPH2/TIAM1/UTRN/MYO9B/PKD2/TRAK1/CAPN2/MYO16	49
MF	GO:0019903	protein phosphatase binding	14/438	62/5628	0.000218626	0.0026478	0.00187686	PPP1R3C/MAP3K5/PHACTR4/LGALS3/STAT3/ADCY8/PARD3/FOXO1/PTPRT/ATP2B4/STAT1/JAK1/IQGAP1/AP3B1	14
BP	GO:0006909	phagocytosis	23/442	139/5658	0.000413871	0.00265361	0.00158182	HSP90AA1/DOCK1/LRP1/ACTG1/CCL2/FYN/VAV3/PTPRJ/DNM2/GSN/MYO10/WASF2/ACTB/MYO18A/ABI1/ABCA1/ITGAV/MERTK/MFGE8/VAV2/APPL2/MEGF10/ADORA1	23
BP	GO:0048844	artery morphogenesis	11/442	44/5658	0.00041949	0.0026854	0.00160077	APOE/PDGFRB/LRP1/BMPR1A/ZMIZ1/NRP1/PRRX1/TGFB2/RBPJ/ADAMTS9/PKD2	11
BP	GO:0008593	regulation of Notch signaling pathway	12/442	51/5658	0.000423949	0.00270542	0.00161271	HES5/MAML2/ZMIZ1/TGFB2/DTX1/STAT3/ADAM10/RBPJ/IL6ST/BCL6/KAT2B/EPN2	12
BP	GO:0043500	muscle adaptation	12/442	51/5658	0.000423949	0.00270542	0.00161271	PRKCA/NR4A3/CAMK2G/AGT/GSN/JARID2/FOXO1/IL6ST/PPARGC1A/MEF2C/ATP2B4/CFLAR	12
BP	GO:0010959	regulation of metal ion transport	27/442	175/5658	0.000430424	0.00271688	0.00161954	GJA1/CAMK2G/PDGFRB/AGT/TF/CCL2/FYN/SERPINE2/B2M/S100A1/PML/CD63/CASK/DNM2/PRNP/LGALS3/UBASH3B/FGF12/RGN/ATP2B4/DLG1/GNAO1/YWHAE/UTRN/PKD2/SRI/ADORA1	27
BP	GO:0009408	response to heat	14/442	66/5658	0.000453537	0.00285834	0.00170386	HSPA1A/HSP90AA1/HSPA1B/CAMK2G/DNAJB1/TPR/FGF1/SST/ATM/HSPA5/NUP160/YWHAE/ST8SIA1/HSPA8	14
MF	GO:0004674	protein serine/threonine kinase activity	25/438	152/5628	0.000243031	0.00287939	0.00204102	PRKCA/CAMK2G/MAP4K4/STK3/AKAP13/BMPR1B/BMPR1A/MINK1/TAOK3/MAP3K5/TNIK/CCND3/LTBP1/PRKG1/TNK2/RPS6KA2/CASK/CSNK1A1/RPS6KA5/MAP3K14/HIPK2/ATM/STK10/NEK7/TGFBR3	25
CC	GO:0030666	endocytic vesicle membrane	17/441	92/5894	0.00039229	0.00293541	0.00189381	APOE/CAMK2G/LRP1/B2M/CD9/DNM2/UBB/RPS27A/HIP1R/WLS/ATP6V0E1/UBC/HIP1/APPL2/PTCH1/EPN2/HLA-E	17
CC	GO:0099568	cytoplasmic region	26/441	173/5894	0.000430755	0.00302265	0.00195009	HSPB1/FGFR2/DLC1/CFL1/ENO1/ITPR2/AKAP13/GLI2/GSN/MYO10/FGF1/ACTB/PARD3/HIP1R/WLS/HIF1A/NEDD9/HIP1/UTRN/ASPH/MYO9B/TULP3/PKD2/AP3B1/TRAK1/CAPN2	26
BP	GO:0043086	negative regulation of catalytic activity	43/442	330/5658	0.000486015	0.00305811	0.00182295	APOE/HSPB1/MT3/APC/PEBP1/PTN/AGT/GADD45B/ZFP36/TAOK3/TMBIM1/DUSP1/TNK2/SERPINE2/PTPRJ/PRNP/BST2/LGALS3/TGFB2/UBASH3B/SORL1/TSC2/WFDC1/RGN/SOCS3/AQP1/PTPRT/SH3RF1/CAMK2N1/WWTR1/ATP2B4/C5/TXNIP/YWHAE/PPP2R5A/KAT2B/IQGAP1/IFI6/BIRC2/HGF/CAST/COL4A3/CFLAR	43
BP	GO:0002791	regulation of peptide secretion	30/442	204/5658	0.000486739	0.00305811	0.00182295	APOE/GJA1/TMSB4X/PRKCA/GLUL/CADM1/MAP4K4/TCF7L2/CD38/ITPR2/LRP1/PPIA/FN1/PML/TGFB2/IL33/ANGPT1/MBP/MYO18A/ADCY8/WLS/HIF1A/NR1D1/HMGN3/C5/TIAM1/TGFB3/SRI/ADORA1/HLA-E	30
BP	GO:0014897	striated muscle hypertrophy	10/442	38/5658	0.00049114	0.00307625	0.00183376	PRKCA/NR4A3/AGT/AKAP13/JARID2/FOXO1/IL6ST/MEF2C/ATP2B4/TIAM1	10
BP	GO:0036473	cell death in response to oxidative stress	10/442	38/5658	0.00049114	0.00307625	0.00183376	HSPB1/NR4A3/SLC7A11/MAP3K5/FYN/PML/PSAP/GPR37L1/HIF1A/HGF	10
BP	GO:0050807	regulation of synapse organization	16/442	82/5658	0.000492862	0.00308054	0.00183632	APOE/PTPRD/PTN/CFL1/NLGN1/IL1RAPL1/SLC7A11/FYN/TUBA1A/PRNP/ADAM10/EPHB1/NRXN1/MEF2C/DNM3/TIAM1	16
BP	GO:0007187	G protein-coupled receptor signaling pathway, coupled to cyclic nucleotide second messenger	17/442	90/5658	0.000493479	0.00308054	0.00183632	PRKCA/GNA14/AGT/AKAP13/CCL2/PSAP/RAMP1/WASF2/ADCY8/GPR37L1/ABCA1/ATP2B4/ADORA2B/GNAO1/GNA12/S1PR1/ADORA1	17
BP	GO:0050776	regulation of immune response	55/442	453/5658	0.000494099	0.00308054	0.00183632	HSPA1A/APOE/HSP90AA1/HSPA1B/FOS/CLU/TFRC/NR4A3/CADM1/PLSCR1/CD38/DOCK1/ACTG1/GAB2/FYN/VAV3/B2M/S100A1/JUN/ITCH/PTPRJ/PRNP/BST2/LGALS3/TGFB2/IL33/MYO10/UBB/RPS27A/WASF2/ANGPT1/ACTB/RPS6KA5/SOCS3/SEC14L1/ABI1/IL6ST/GPRC5B/MEF2C/UBC/ADORA2B/STAT1/VAV2/NR1D1/APPL2/C5/IL6R/JAK1/BCL6/TGFB3/TAB2/CTSH/BIRC2/NR1H2/HLA-E	55
BP	GO:0030855	epithelial cell differentiation	38/442	281/5658	0.000502921	0.00313074	0.00186624	ID2/FGFR2/GJA1/PTN/MYO1E/SLC7A11/ZFP36L1/HES5/ZFP36/NRP1/SOX9/JUN/PSAP/ZEB1/MSN/LAMA1/LGALS3/SRSF6/INTU/RAP1B/OPHN1/RBPJ/ID1/NRG1/YAP1/MEF2C/HIF1A/WWTR1/STAT1/NFIB/TXNIP/SIPA1L3/S1PR1/IQGAP1/FGFR1/FRS2/AR/PTCH1	38
BP	GO:0001501	skeletal system development	35/442	252/5658	0.000508506	0.00316067	0.00188408	FGFR2/GJA1/AKAP13/BMPR1B/HES5/BMPR1A/CHI3L1/FGF2/GLI2/SULF1/SOX9/PRRX1/ZEB1/EFEMP1/FGFR3/TGFB2/WASF2/NCAN/RGN/BCAN/ABI1/ITGB8/MEF2C/HIF1A/DLG1/CHST11/NFIB/SH3PXD2B/VCAN/TGFB3/FGFR1/TULP3/FBN2/PDGFC/PRDX1	35
BP	GO:0072080	nephron tubule development	12/442	52/5658	0.000512972	0.00317379	0.00189191	AGT/HES5/FGF2/SOX9/FGF1/YAP1/MEF2C/WWTR1/STAT1/DLG1/PKD2/PTCH1	12
CC	GO:0019897	extrinsic component of plasma membrane	15/441	77/5894	0.000476192	0.00328043	0.00211641	GNA14/APC/TF/FYN/CTNNA1/CDH13/SERPINE2/GNG7/S100A6/MFGE8/HIP1/GNAO1/GNA12/TIAM1/IQGAP1	15
BP	GO:0051047	positive regulation of secretion	28/442	187/5658	0.000556843	0.0033936	0.00202294	GJA1/GLUL/CADM1/CCK/TCF7L2/CD38/NLGN1/AGT/LRP1/GAB2/PPIA/TGFB2/IL33/SYT1/MBP/MYO18A/ADCY8/AQP1/WLS/HIF1A/SDC4/ADORA2B/C5/TGFB3/FGFR1/SRI/ADORA1/HLA-E	28
BP	GO:0021953	central nervous system neuron differentiation	15/442	75/5658	0.000558504	0.0033936	0.00202294	HSP90AA1/FGFR2/GABRB1/NR4A2/HES5/GLI2/NRP1/B2M/UBB/OPHN1/EPHB1/ID4/NFIB/TULP3/PTCH1	15
BP	GO:2001235	positive regulation of apoptotic signaling pathway	15/442	75/5658	0.000558504	0.0033936	0.00202294	STK3/AGT/BMPR1B/CTNNA1/PML/FAS/GSN/UBB/CRADD/PPP2R1B/HIP1R/TPD52L1/ST18/YWHAE/CTSH	15
MF	GO:0004714	transmembrane receptor protein tyrosine kinase activity	10/438	36/5628	0.000295037	0.00342118	0.00242506	FGFR2/PDGFRB/EPHA6/NRP1/EFEMP1/FGFR3/EPHB1/DDR2/MERTK/FGFR1	10
BP	GO:0006470	protein dephosphorylation	21/442	125/5658	0.000594609	0.00358087	0.00213456	PTPRD/PTPRZ1/CAMK2G/PDGFRB/DLC1/PTN/PPP1R3C/DUSP1/PHACTR4/PTPRJ/LGALS3/PTPRG/UBASH3B/PPP2R1B/RGN/PTPRT/PTPRM/DLG1/YWHAE/PPP2R5A/ADORA1	21
BP	GO:1904062	regulation of cation transmembrane transport	21/442	125/5658	0.000594609	0.00358087	0.00213456	TMSB4X/NLGN1/AGT/MINK1/CCL2/FYN/S100A1/CD63/DNM2/PRNP/UBASH3B/FGF12/RGN/PPARGC1A/MEF2C/ATP2B4/DLG1/YWHAE/UTRN/PKD2/SRI	21
BP	GO:0043269	regulation of ion transport	36/442	264/5658	0.000602784	0.00360871	0.00215116	APOE/GJA1/TMSB4X/CAMK2G/PDGFRB/CCK/NLGN1/AGT/MINK1/TF/CCL2/FYN/SERPINE2/B2M/S100A1/PML/CD63/CASK/DNM2/PRNP/LGALS3/SYT1/UBASH3B/FGF12/RGN/PPARGC1A/MEF2C/ATP2B4/DLG1/GNAO1/YWHAE/UTRN/FGFR1/PKD2/SRI/ADORA1	36
BP	GO:0014896	muscle hypertrophy	10/442	39/5658	0.0006153	0.00367283	0.00218938	PRKCA/NR4A3/AGT/AKAP13/JARID2/FOXO1/IL6ST/MEF2C/ATP2B4/TIAM1	10
BP	GO:0048259	regulation of receptor-mediated endocytosis	10/442	39/5658	0.0006153	0.00367283	0.00218938	CLU/TF/TNK2/B2M/CD63/DNM2/OPHN1/ANGPT1/HIP1R/HIP1	10
CC	GO:0016323	basolateral plasma membrane	18/441	103/5894	0.000541647	0.00367305	0.00236971	TFRC/CADM1/CD38/LRP1/TF/CASK/MSN/ADCY8/AQP1/ITGA6/ABCC4/ATP2B4/DLG1/MAP7/SLC4A4/IL6R/PKD2/ADORA1	18
CC	GO:0030139	endocytic vesicle	24/441	157/5894	0.00055302	0.00369247	0.00238224	APOE/HSP90AA1/CAMK2G/MYO1E/LRP1/ACTG1/TF/B2M/CD9/DNM2/GSN/UBB/RPS27A/HIP1R/ABCA1/WLS/ITGAV/ATP6V0E1/UBC/HIP1/APPL2/PTCH1/EPN2/HLA-E	24
BP	GO:0062013	positive regulation of small molecule metabolic process	14/442	68/5658	0.000624758	0.00372382	0.00221978	TMSB4X/NR4A3/ENO1/STAT3/FGF1/RGN/FOXO1/SORBS1/PPARGC1A/HIF1A/ADORA2B/NR1D1/KAT2B/NR1H2	14
BP	GO:0032231	regulation of actin filament bundle assembly	11/442	46/5658	0.000632654	0.00375436	0.00223799	STMN1/DLC1/ARHGEF10/NRP1/WASF2/ID1/SDC4/SH3PXD2B/S1PR1/TGFB3/ARHGEF10L	11
BP	GO:0045685	regulation of glial cell differentiation	11/442	46/5658	0.000632654	0.00375436	0.00223799	ID2/PTPRZ1/PTN/HES5/DAB1/SERPINE2/GPR37L1/IL6ST/ID4/DICER1/NR1D1	11
BP	GO:0046620	regulation of organ growth	11/442	46/5658	0.000632654	0.00375436	0.00223799	FGFR2/GJA1/STK3/BMPR1A/FGF2/JARID2/RBPJ/YAP1/MEF2C/FGFR1/TGFBR3	11
CC	GO:0030027	lamellipodium	17/441	95/5894	0.000579004	0.00380739	0.00245638	APC/CFL1/ANTXR1/PHACTR4/CTNNA1/MCC/DNM2/GSN/MYO10/WASF2/ARHGAP31/ABI1/SH3RF1/ITGAV/NEDD9/PTPRM/PKD2	17
BP	GO:0048754	branching morphogenesis of an epithelial tube	17/442	92/5658	0.000643382	0.00381246	0.00227262	FGFR2/AGT/TNC/FGF2/GLI2/NRP1/SOX9/PML/SEMA3E/LAMA1/FGF1/YAP1/DLG1/PKD2/CTSH/AR/PTCH1	17
BP	GO:0032412	regulation of ion transmembrane transporter activity	16/442	84/5658	0.000652103	0.00385851	0.00230007	TMSB4X/NLGN1/MINK1/CCL2/S100A1/DNM2/PRNP/FGF12/RGN/PPARGC1A/MEF2C/DLG1/YWHAE/UTRN/PKD2/SRI	16
BP	GO:0007015	actin filament organization	27/442	180/5658	0.0006773	0.00400178	0.00238547	TMSB4X/STMN1/SEMA5A/DLC1/CFL1/ARHGEF10/PREX1/NRP1/GSN/KANK1/WASF2/ABI1/HIP1R/SORBS1/ID1/ELN/NEDD9/SDC4/DLG1/HIP1/SH3PXD2B/S1PR1/ARHGAP17/DIAPH2/RICTOR/TGFB3/ARHGEF10L	27
MF	GO:0019207	kinase regulator activity	16/438	80/5628	0.000352626	0.00400377	0.00283802	HSPB1/MT3/APC/STK3/TAOK3/CCND3/CCNY/SOCS3/ABI1/NRG1/GPRC5B/CAMK2N1/RPLP1/KAT2B/IQGAP1/NRG3	16
BP	GO:0060249	anatomical structure homeostasis	24/442	153/5658	0.000697254	0.0041137	0.00245219	HSPB1/HSP90AA1/PRKCA/TFRC/CD38/HMBOX1/ACTG1/HNRNPA2B1/TF/SOX9/B2M/PML/UBASH3B/ACTB/YAP1/HIF1A/WWTR1/ATM/HNRNPD/S1PR1/NEK7/CTSH/ADORA1/PRDX1	24
BP	GO:0072593	reactive oxygen species metabolic process	20/442	118/5658	0.000710896	0.00416396	0.00248215	HSP90AA1/MT3/CLU/PDGFRB/AGT/FYN/PREX1/DNM2/STAT3/RGN/FOXO1/HIF1A/ATP2B4/DDIT4/SH3PXD2B/IFI6/PKD2/BIRC2/CFLAR/PRDX1	20
CC	GO:0009897	external side of plasma membrane	25/441	168/5894	0.000643316	0.00416715	0.00268849	TFRC/NLGN1/BMPR1A/ANTXR1/TF/CNTFR/MAP3K5/F3/CDH13/SERPINE2/B2M/CD9/GFRA1/PRNP/IL6ST/ITGA6/ABCA1/ITGAV/MFGE8/IL6R/S1PR1/CAPN2/TGFBR3/GHR/HLA-E	25
BP	GO:0061061	muscle structure development	40/442	306/5658	0.000718635	0.00420324	0.00250556	FGFR2/GJA1/FOS/PDGFRB/TCF7L2/AGT/ZFP36L1/AKAP13/BMPR1A/ACTG1/CNTFR/CXCL14/MAP3K5/FGF2/CTNNA1/SOX9/CD9/DDX5/ZEB1/TGFB2/EGR1/SPAG9/S100B/JARID2/RBPJ/EPHB1/NRG1/YAP1/ELN/MEF2C/S1PR1/MEGF10/UTRN/FGFR1/FRS2/SRI/CAPN2/TGFBR3/ARID1A/CFLAR	40
BP	GO:0032355	response to estradiol	14/442	69/5658	0.00072914	0.00425855	0.00253854	GJA1/PDGFRB/PTN/CD38/AGT/DUSP1/NCOR2/STAT3/WFDC1/PPARGC1A/HNRNPD/TXNIP/PTCH1/CFLAR	14
BP	GO:0001938	positive regulation of endothelial cell proliferation	12/442	54/5658	0.000738678	0.0043019	0.00256437	PRKCA/SEMA5A/NR4A1/F3/FGF2/CDH13/NRP1/JUN/STAT3/HIF1A/RICTOR/FGFR1	12
BP	GO:0061326	renal tubule development	12/442	54/5658	0.000738678	0.0043019	0.00256437	AGT/HES5/FGF2/SOX9/FGF1/YAP1/MEF2C/WWTR1/STAT1/DLG1/PKD2/PTCH1	12
BP	GO:1903532	positive regulation of secretion by cell	26/442	172/5658	0.000753431	0.00435661	0.00259699	GJA1/GLUL/CADM1/CCK/TCF7L2/CD38/NLGN1/AGT/LRP1/GAB2/PPIA/TGFB2/IL33/SYT1/MBP/MYO18A/ADCY8/WLS/HIF1A/SDC4/ADORA2B/C5/TGFB3/FGFR1/SRI/HLA-E	26
BP	GO:0007569	cell aging	10/442	40/5658	0.000764299	0.00438794	0.00261566	ID2/LIMS1/BMPR1A/ZMIZ1/B2M/PML/ATM/NAMPT/BCL6/MORC3	10
BP	GO:0061045	negative regulation of wound healing	10/442	40/5658	0.000764299	0.00438794	0.00261566	APOE/GJA1/FGF2/PRKG1/SERPINE2/CD9/CASK/UBASH3B/WFDC1/ADAMTS18	10
BP	GO:1900407	regulation of cellular response to oxidative stress	10/442	40/5658	0.000764299	0.00438794	0.00261566	HSPB1/NR4A3/SLC7A11/FYN/PSAP/GPR37L1/RGN/FUT8/HIF1A/HGF	10
BP	GO:0001656	metanephros development	11/442	47/5658	0.000769133	0.00439119	0.0026176	ID2/PDGFRB/HES5/SOX9/EGR1/YAP1/WWTR1/STAT1/PKD2/CTSH/PTCH1	11
BP	GO:0030510	regulation of BMP signaling pathway	11/442	47/5658	0.000769133	0.00439119	0.0026176	HES5/SMURF2/SULF1/TOB1/ZNF423/NEO1/SORL1/RBPJ/HIPK2/HTRA1/CHRDL1	11
BP	GO:0048675	axon extension	11/442	47/5658	0.000769133	0.00439119	0.0026176	APOE/HSP90AA1/MT3/SEMA5A/LRP1/NRP1/FN1/SEMA3E/DNM2/DSCAM/LHX2	11
BP	GO:0002764	immune response-regulating signaling pathway	34/442	248/5658	0.000774247	0.00441418	0.00263131	HSPA1A/HSP90AA1/HSPA1B/FOS/NR4A3/PLSCR1/CD38/DOCK1/ACTG1/GAB2/FYN/VAV3/S100A1/JUN/ITCH/PTPRJ/PRNP/LGALS3/MYO10/UBB/RPS27A/WASF2/ACTB/RPS6KA5/SEC14L1/ABI1/MEF2C/UBC/VAV2/NR1D1/APPL2/TAB2/CTSH/BIRC2	34
BP	GO:0010595	positive regulation of endothelial cell migration	13/442	62/5658	0.000809057	0.00459974	0.00274192	HSPB1/TMSB4X/PRKCA/SEMA5A/AGT/FGF2/NRP1/PIK3C2A/FGF1/ANGPT1/HIF1A/SASH1/FGFR1	13
BP	GO:0099504	synaptic vesicle cycle	13/442	62/5658	0.000809057	0.00459974	0.00274192	NLGN1/ACTG1/NLGN4X/CASK/DNM2/SYT1/RAP1B/OPHN1/ACTB/NRXN1/ADORA2B/DNM3/AP3B1	13
BP	GO:0010639	negative regulation of organelle organization	21/442	128/5658	0.000820549	0.00465857	0.00277698	HSPA1A/TMSB4X/STMN1/CLU/APC/DLC1/DUSP1/TPR/DNM2/GSN/TET1/KANK1/WASF2/TSC2/JARID2/HIP1R/PPARGC1A/ATM/S1PR1/KAT2B/HGF	21
CC	GO:0043197	dendritic spine	13/441	64/5894	0.000742034	0.00473592	0.00305543	MT3/DNAJB1/NLGN1/DNM2/FUS/OPHN1/ADAM10/HIP1R/NR1D1/DNM3/TIAM1/SRI/ADORA1	13
BP	GO:0000278	mitotic cell cycle	45/442	359/5658	0.000840002	0.00476235	0.00283885	HSPA1A/HSP90AA1/HSPA1B/ID2/STMN1/PRKCA/APC/PDGFRB/CFL1/ARHGEF10/ZFP36L1/MEIS2/TAOK3/CCL2/CCND3/DUSP1/PHIP/TUBB2B/CDH13/TUBA1A/PML/TPR/DNM2/CCNY/CRADD/TACC1/CDC73/TADA3/ID4/RPS6/ATM/DLG1/STAMBP/TPD52L1/BCL6/YWHAE/IQGAP1/FGFR1/PKD2/PRMT2/NEK7/TUBA1B/HGF/PTCH1/MYO16	45
BP	GO:0090257	regulation of muscle system process	19/442	111/5658	0.000848189	0.00480207	0.00286253	PRKCA/NR4A3/CAMK2G/DOCK4/ENO1/AGT/PRKG1/PLCE1/JARID2/FOXO1/IL6ST/PPARGC1A/ATP2B4/ADORA2B/DLG1/UTRN/SRI/DOCK5/ADORA1	19
BP	GO:0061351	neural precursor cell proliferation	15/442	78/5658	0.000860797	0.00486668	0.00290104	ID2/FGFR2/PTPRZ1/PTN/CTNNA1/PTBP2/GPR37L1/FOXO1/EPHB1/LHX2/HIF1A/ID4/APPL2/FGFR1/FRS2	15
BP	GO:0006939	smooth muscle contraction	12/442	55/5658	0.000879503	0.00494528	0.0029479	DOCK4/CD38/AGT/SULF1/PRKG1/PIK3C2A/PLCE1/ATP2B4/ADORA2B/DLG1/DOCK5/ADORA1	12
CC	GO:0030136	clathrin-coated vesicle	16/441	89/5894	0.000791983	0.00498146	0.00321384	APOE/TFRC/MYO1E/LRP1/TF/TNK2/PIK3C2A/CD9/DNM2/SYT1/ADCY8/HIP1R/HIP1/AP3B1/HSPA8/EPN2	16
MF	GO:0005178	integrin binding	15/438	74/5628	0.000461195	0.00502702	0.00356334	PRKCA/PTPRZ1/PTN/FGF2/FN1/CD9/FGF1/ADAM10/ITGB8/NRG1/ITGAV/MFGE8/FRMD5/UTRN/COL4A3	15
MF	GO:0019902	phosphatase binding	16/438	82/5628	0.000472268	0.00504679	0.00357735	PPP1R3C/MAP3K5/PHACTR4/LGALS3/STAT3/TSC2/ADCY8/PARD3/FOXO1/PTPRT/ATP2B4/STAT1/DLG1/JAK1/IQGAP1/AP3B1	16
BP	GO:0007596	blood coagulation	24/442	156/5658	0.00092606	0.00512866	0.00305721	APOE/HSPB1/PRKCA/GNA14/PLSCR1/DOCK1/SLC7A11/ITPR2/ACTG1/FYN/F3/PRKG1/VAV3/SERPINE2/CD9/UBASH3B/ACTB/ENTPD1/MERTK/VAV2/GNA12/AP3B1/ADAMTS18/FBLN1	24
BP	GO:0034109	homotypic cell-cell adhesion	11/442	48/5658	0.000929181	0.00513894	0.00306334	HSPB1/PRKCA/SLC7A11/ACTG1/PRKG1/SERPINE2/CD9/UBASH3B/ACTB/MEGF10/ADAMTS18	11
MF	GO:0005524	ATP binding	55/438	455/5628	0.000500368	0.0051782	0.0036705	HSPA1A/HSP90AA1/HSPA1B/FGFR2/PRKCA/GLUL/CAMK2G/PDGFRB/PEBP1/MAP4K4/MYO1E/STK3/BMPR1B/BMPR1A/ACTG1/MINK1/TAOK3/EPHA6/MAP3K5/FYN/TNIK/PRKG1/TNK2/ABCD4/PIK3C2A/RPS6KA2/CASK/DDX5/FGFR3/MYO10/CSNK1A1/ACTB/MYO18A/ADCY8/ENTPD1/RPS6KA5/MAP3K14/EPHB1/DDR2/ABCA1/ABCC4/KSR1/HIPK2/MERTK/ATP2B4/ATM/HSPA5/DICER1/JAK1/STK10/FGFR1/MYO9B/NEK7/HSPA8/MYO16	55
MF	GO:0004713	protein tyrosine kinase activity	14/438	67/5628	0.00051307	0.0051782	0.0036705	FGFR2/PDGFRB/EPHA6/FYN/TNK2/NRP1/EFEMP1/FGFR3/EPHB1/DDR2/HIPK2/MERTK/JAK1/FGFR1	14
BP	GO:0070374	positive regulation of ERK1 and ERK2 cascade	17/442	95/5658	0.000940743	0.00518038	0.00308804	APOE/MT3/FGFR2/PRKCA/PDGFRB/LRP1/CHI3L1/CCL2/FGF2/NRP1/JUN/FGFR3/RAP1B/ANGPT1/PDGFC/DDT/CFLAR	17
BP	GO:1903362	regulation of cellular protein catabolic process	17/442	95/5658	0.000940743	0.00518038	0.00308804	HSPA1A/APOE/HSP90AA1/HSPA1B/CLU/GABARAPL2/LRP1/PML/MSN/IL33/UBB/SMARCC1/OPHN1/CSNK1A1/RGN/HIPK2/GNA12	17
BP	GO:0034333	adherens junction assembly	10/442	41/5658	0.000941771	0.00518038	0.00308804	APOD/MAP4K4/DLC1/LIMS1/LRP1/NRP1/PTPRJ/SORBS1/SDC4/IQGAP1	10
BP	GO:0051492	regulation of stress fiber assembly	10/442	41/5658	0.000941771	0.00518038	0.00308804	STMN1/DLC1/ARHGEF10/NRP1/WASF2/SDC4/SH3PXD2B/S1PR1/TGFB3/ARHGEF10L	10
BP	GO:0045778	positive regulation of ossification	13/442	63/5658	0.000948647	0.00521115	0.00310638	PTN/TOB2/BMPR1B/BMPR1A/JUND/TGFB2/IL6ST/DDR2/MEF2C/IL6R/TGFB3/FBN2/HGF	13
CC	GO:0044309	neuron spine	13/441	65/5894	0.000865872	0.0053684	0.00346349	MT3/DNAJB1/NLGN1/DNM2/FUS/OPHN1/ADAM10/HIP1R/NR1D1/DNM3/TIAM1/SRI/ADORA1	13
BP	GO:0007626	locomotory behavior	14/442	71/5658	0.000982582	0.00539028	0.00321316	APOE/ID2/PREX2/NR4A2/DAB1/PSAP/DSCAM/EGR1/FGF12/ADCY8/NRG1/HIPK2/GNAO1/NCOA2	14
BP	GO:0040029	regulation of gene expression, epigenetic	20/442	121/5658	0.000986059	0.00540206	0.00322019	ZFP36/HNRNPA2B1/NEAT1/ZMIZ1/NCOR2/WBP2/TPR/DDX5/TET1/STAT3/ACTB/JARID2/LHX2/DICER1/POLR2L/NUP160/POLR2J/KAT2B/BAZ2A/ARID1A	20
BP	GO:1903827	regulation of cellular protein localization	28/442	194/5658	0.00100728	0.00548874	0.00327185	HSP90AA1/GPC6/APOD/GLUL/APC/PTN/TCF7L2/SLC7A11/LRP1/TMBIM1/FYN/GPC5/TPR/GSN/MSN/PRNP/LGALS3/ANGPT1/ACTB/SORL1/ADAM10/SORBS1/DLG1/VPS28/YWHAE/PPP2R5A/IQGAP1/AR	28
BP	GO:0001841	neural tube formation	12/442	56/5658	0.00104202	0.00564025	0.00336217	DLC1/CFL1/STK3/PHACTR4/TGFB2/TSC2/LHX2/HIF1A/SDC4/TULP3/PTCH1/ARID1A	12
BP	GO:0048167	regulation of synaptic plasticity	12/442	56/5658	0.00104202	0.00564025	0.00336217	APOE/PTN/CD38/NLGN1/AGT/SERPINE2/PRNP/ADCY8/S100B/MEF2C/IGSF11/ADORA1	12
CC	GO:0032587	ruffle membrane	11/441	50/5894	0.000935576	0.00571887	0.0036896	APC/DLC1/CFL1/PTPRJ/DNM2/KANK1/HIP1R/KSR1/ITGAV/APPL2/TIAM1	11
MF	GO:0008013	beta-catenin binding	11/438	46/5628	0.000612504	0.00575542	0.00407965	APC/TCF7L2/NR4A2/CTNNA1/SOX9/PTPRJ/KANK1/FOXO1/PTPRT/TBL1X/AR	11
BP	GO:0048863	stem cell differentiation	20/442	122/5658	0.00109612	0.00592515	0.003532	FGFR2/SEMA5A/PTN/CFL1/HES5/BMPR1A/PHACTR4/NRP1/FN1/SOX9/ITCH/SEMA3E/TGFB2/STAT3/JARID2/RBPJ/NRG1/YAP1/MEF2C/HIF1A	20
BP	GO:0050817	coagulation	24/442	158/5658	0.00111251	0.00600576	0.00358005	APOE/HSPB1/PRKCA/GNA14/PLSCR1/DOCK1/SLC7A11/ITPR2/ACTG1/FYN/F3/PRKG1/VAV3/SERPINE2/CD9/UBASH3B/ACTB/ENTPD1/MERTK/VAV2/GNA12/AP3B1/ADAMTS18/FBLN1	24
BP	GO:0031532	actin cytoskeleton reorganization	11/442	49/5658	0.00111582	0.00600767	0.00358119	ANTXR1/MINK1/TNIK/NRP1/GAB1/SEMA3E/GSN/NEDD9/S1PR1/RICTOR/THSD7A	11
BP	GO:0070167	regulation of biomineral tissue development	11/442	49/5658	0.00111582	0.00600767	0.00358119	GJA1/PTN/BMPR1B/BMPR1A/SOX9/DDR2/MEF2C/HIF1A/S1PR1/TGFB3/FBN2	11
BP	GO:0046328	regulation of JNK cascade	15/442	80/5658	0.00113138	0.00608343	0.00362635	MAP4K4/STK3/GADD45B/MINK1/TAOK3/MAP3K5/TNIK/ITCH/SPAG9/EPHB1/SH3RF1/SASH1/HIPK2/TPD52L1/TIAM1	15
BP	GO:0001890	placenta development	14/442	72/5658	0.00113482	0.0060858	0.00362776	FGFR2/GJA1/PTN/STK3/ZFP36L1/SOCS3/RBPJ/ITGB8/HIF1A/RPS6/HTRA1/PKD2/BIRC2/ARID1A	14
BP	GO:0007623	circadian rhythm	14/442	72/5658	0.00113482	0.0060858	0.00362776	ID2/NLGN1/JUND/PML/JUN/EGR1/PPARGC1A/ID1/ID4/NR1D1/HNRNPD/NAMPT/NCOA2/ADORA1	14
BP	GO:0051090	regulation of DNA-binding transcription factor activity	29/442	205/5658	0.00113785	0.006094	0.00363265	HSPA1A/HSPA1B/ID2/TMSB4X/FOS/CLU/TCF7L2/STK3/AGT/JUN/ITCH/PRNP/UBB/RPS27A/STAT3/ADCY8/RPS6KA5/PPARGC1A/DDR2/ID1/HIPK2/UBC/PKD2/PRMT2/SRI/TAB2/AR/PTCH1/CFLAR	29
BP	GO:1902882	regulation of response to oxidative stress	10/442	42/5658	0.00115167	0.00615992	0.00367194	HSPB1/NR4A3/SLC7A11/FYN/PSAP/GPR37L1/RGN/FUT8/HIF1A/HGF	10
BP	GO:0050878	regulation of body fluid levels	31/442	225/5658	0.00120915	0.00645887	0.00385015	APOE/HSPB1/GJA1/STMN1/PRKCA/GNA14/PLSCR1/DOCK1/SLC7A11/ITPR2/ACTG1/FYN/F3/PRKG1/VAV3/NCOR2/SERPINE2/CD9/UBASH3B/ACTB/ADCY8/ENTPD1/AQP1/HIF1A/MERTK/VAV2/GNA12/AP3B1/ADAMTS18/ADORA1/FBLN1	31
BP	GO:0007599	hemostasis	24/442	159/5658	0.00121732	0.00649396	0.00387107	APOE/HSPB1/PRKCA/GNA14/PLSCR1/DOCK1/SLC7A11/ITPR2/ACTG1/FYN/F3/PRKG1/VAV3/SERPINE2/CD9/UBASH3B/ACTB/ENTPD1/MERTK/VAV2/GNA12/AP3B1/ADAMTS18/FBLN1	24
BP	GO:0006812	cation transport	49/442	407/5658	0.00122506	0.00652668	0.00389057	MT3/GJA1/TMSB4X/TFRC/CAMK2G/PDGFRB/NLGN1/AGT/IL1RAPL1/ITPR2/MINK1/TF/CCL2/SLC9A9/FYN/FGF2/SLC3A2/SERPINE2/B2M/S100A1/PML/CD63/CASK/DNM2/PRNP/SLC20A2/LGALS3/RAMP1/SYT1/UBASH3B/FGF12/RGN/PLCE1/SEC14L1/AQP1/PPARGC1A/MEF2C/ITGAV/SLC1A3/ATP6V0E1/ATP2B4/DLG1/GNAO1/SLC4A4/YWHAE/UTRN/PKD2/SRI/ADORA1	49
BP	GO:0031347	regulation of defense response	43/442	345/5658	0.00123109	0.00655022	0.0039046	HSPA1A/APOE/HSPA1B/GJA1/TMSB4X/APOD/CLU/CADM1/CCK/PLSCR1/AGT/NEAT1/FYN/S100A1/ITCH/IL33/UBB/RPS27A/WFDC1/RPS6KA5/SOCS3/SEC14L1/IL6ST/GPRC5B/MEF2C/UBC/ATM/ADORA2B/STAT1/NR1D1/APPL2/C5/JAK1/BCL6/HTRA1/RICTOR/TAB2/BIRC2/HGF/ADORA1/DDT/NR1H2/HLA-E	43
BP	GO:0007188	adenylate cyclase-modulating G protein-coupled receptor signaling pathway	15/442	81/5658	0.00129155	0.00678315	0.00404346	PRKCA/GNA14/AKAP13/PSAP/RAMP1/WASF2/ADCY8/GPR37L1/ABCA1/ATP2B4/ADORA2B/GNAO1/GNA12/S1PR1/ADORA1	15
BP	GO:0090276	regulation of peptide hormone secretion	14/442	73/5658	0.00130636	0.00685208	0.00408455	GJA1/PRKCA/GLUL/MAP4K4/TCF7L2/CD38/ITPR2/LRP1/ADCY8/HIF1A/NR1D1/HMGN3/TIAM1/SRI	14
CC	GO:0098802	plasma membrane receptor complex	16/441	92/5894	0.00114865	0.00692383	0.00446699	TFRC/NLGN1/BMPR1B/BMPR1A/TF/CNTFR/B2M/RAMP1/SORBS1/IL6ST/ITGA6/ITGB8/ITGAV/DLG1/IL6R/BIRC2	16
BP	GO:0030001	metal ion transport	42/442	336/5658	0.00132384	0.00693479	0.00413385	MT3/GJA1/TFRC/CAMK2G/PDGFRB/AGT/IL1RAPL1/ITPR2/TF/CCL2/SLC9A9/FYN/FGF2/SLC3A2/SERPINE2/B2M/S100A1/PML/CD63/CASK/DNM2/PRNP/SLC20A2/LGALS3/RAMP1/UBASH3B/FGF12/RGN/PLCE1/AQP1/ITGAV/SLC1A3/ATP6V0E1/ATP2B4/DLG1/GNAO1/SLC4A4/YWHAE/UTRN/PKD2/SRI/ADORA1	42
BP	GO:0014033	neural crest cell differentiation	11/442	50/5658	0.00133229	0.00696111	0.00414954	SEMA5A/CFL1/BMPR1A/PHACTR4/NRP1/FN1/SOX9/SEMA3E/NRG1/MEF2C/HIF1A	11
BP	GO:0045185	maintenance of protein location	11/442	50/5658	0.00133229	0.00696111	0.00414954	TMSB4X/LTBP1/PML/GSN/SORL1/HSPA5/IGSF11/PKD2/MORC3/SRI/FBN2	11
CC	GO:0045211	postsynaptic membrane	18/441	110/5894	0.00120699	0.00717579	0.00462954	GABRB1/NLGN1/IL1RAPL1/MINK1/GABRG1/NLGN4X/NRP1/DNM2/ADCY8/ADAM10/ABI1/CAMK2N1/DLG1/HIP1/DNM3/TIAM1/UTRN/ADORA1	18
CC	GO:0031256	leading edge membrane	15/441	84/5894	0.00123077	0.00721829	0.00465696	APC/DLC1/CFL1/ANTXR1/GABRG1/PTPRJ/DNM2/KANK1/HIP1R/WLS/KSR1/ITGAV/APPL2/TIAM1/ADORA1	15
BP	GO:0060968	regulation of gene silencing	10/442	43/5658	0.00139826	0.00727778	0.0043383	ZFP36/NEAT1/NCOR2/TPR/DDX5/TET1/STAT3/POLR2L/NUP160/POLR2J	10
BP	GO:1903034	regulation of response to wounding	16/442	90/5658	0.00141737	0.00729544	0.00434883	APOE/GJA1/PRKCA/PTN/LRP1/F3/FGF2/PRKG1/SERPINE2/CD9/CASK/KANK1/SRSF6/UBASH3B/WFDC1/ADAMTS18	16
MF	GO:0045296	cadherin binding	23/438	146/5628	0.000800365	0.0073932	0.00524057	HSPA1A/DNAJB1/ENO1/SLC3A2/CTNNA1/CDH13/PTPRJ/NDRG1/WASF2/RPL23A/PTPRT/ABI1/ITGA6/PTPRM/STAT1/DLG1/HSPA5/YWHAE/IQGAP1/CAST/HSPA8/EPN2/PRDX1	23
BP	GO:0007389	pattern specification process	27/442	189/5658	0.00144247	0.00740356	0.00441329	FGFR2/GJA1/APC/BMPR1B/HES5/BMPR1A/GLI2/NRP1/ZEB1/FGF1/INTU/RBPJ/ABI1/LHX2/WLS/MEF2C/HIF1A/HIPK2/ATM/ASPH/FGFR1/TULP3/FRS2/PKD2/NRG3/AR/PTCH1	27
BP	GO:0048872	homeostasis of number of cells	19/442	116/5658	0.00146467	0.00750806	0.00447557	HSPA1A/HSPA1B/ID2/SLC7A11/ZFP36L1/ZFP36/SOX9/B2M/STAT3/RPS24/MEF2C/HIF1A/HIPK2/MERTK/RPS6/STAT1/BCL6/TGFBR3/PRDX1	19
BP	GO:0017038	protein import	13/442	66/5658	0.00149366	0.00762782	0.00454696	APOE/HSP90AA1/APOD/CLU/AGT/PML/TPR/STAT3/ANGPT1/TSC2/APPL2/TXNIP/HSPA8	13
BP	GO:0043534	blood vessel endothelial cell migration	13/442	66/5658	0.00149366	0.00762782	0.00454696	APOE/HSPB1/TMSB4X/PRKCA/NR4A1/FGF2/NRP1/PIK3C2A/ANGPT1/ID1/MEF2C/HIF1A/FGFR1	13
BP	GO:0072089	stem cell proliferation	13/442	66/5658	0.00149366	0.00762782	0.00454696	FGFR2/ETV6/PTN/ZFP36L1/FGF2/CTNNA1/YAP1/HIF1A/ZNRF3/ID4/FGFR1/FRS2/FBLN1	13
BP	GO:0021782	glial cell development	14/442	74/5658	0.00149908	0.0076363	0.00455202	MT3/ID2/CLU/ARHGEF10/HES5/LRP1/CD9/GSN/NDRG1/PARD3/NRG1/ID4/DICER1/NR1D1	14
BP	GO:0061041	regulation of wound healing	14/442	74/5658	0.00149908	0.0076363	0.00455202	APOE/GJA1/PRKCA/F3/FGF2/PRKG1/SERPINE2/CD9/CASK/KANK1/SRSF6/UBASH3B/WFDC1/ADAMTS18	14
BP	GO:0045165	cell fate commitment	21/442	134/5658	0.00150136	0.00763831	0.00455322	ID2/FGFR2/APC/TCF7L2/HES5/BMPR1A/FGF2/GLI2/NRP1/SOX9/PRRX1/PML/STAT3/RBPJ/CDC73/NRG1/MEF2C/SH3PXD2B/FGFR1/AR/PTCH1	21
BP	GO:0046777	protein autophosphorylation	17/442	99/5658	0.00151328	0.00768934	0.00458364	FGFR2/PDGFRB/MINK1/TAOK3/FYN/TNIK/TNK2/JUN/FGFR3/EPHB1/DDR2/ATM/PPP2R5A/STK10/IQGAP1/FGFR1/PDGFC	17
BP	GO:0016525	negative regulation of angiogenesis	11/442	51/5658	0.00158208	0.00799895	0.0047682	PTN/AGT/SULF1/PML/SEMA3E/TGFB2/PTPRM/STAT1/ADAMTS9/COL4A3/EPN2	11
BP	GO:0060993	kidney morphogenesis	11/442	51/5658	0.00158208	0.00799895	0.0047682	PDGFRB/AGT/HES5/FGF2/SOX9/FGF1/WWTR1/STAT1/DLG1/PKD2/PTCH1	11
BP	GO:1904035	regulation of epithelial cell apoptotic process	11/442	51/5658	0.00158208	0.00799895	0.0047682	SEMA5A/TCF7L2/ZFP36L1/ZFP36/CCL2/GSN/SRSF6/ANGPT1/PPARGC1A/CAST/CFLAR	11
BP	GO:2000181	negative regulation of blood vessel morphogenesis	11/442	51/5658	0.00158208	0.00799895	0.0047682	PTN/AGT/SULF1/PML/SEMA3E/TGFB2/PTPRM/STAT1/ADAMTS9/COL4A3/EPN2	11
BP	GO:0030072	peptide hormone secretion	16/442	91/5658	0.00159939	0.00807641	0.00481437	GJA1/PRKCA/GLUL/CAMK2G/MAP4K4/TCF7L2/CD38/ITPR2/LRP1/CPE/ADCY8/HIF1A/NR1D1/HMGN3/TIAM1/SRI	16
BP	GO:0030177	positive regulation of Wnt signaling pathway	12/442	59/5658	0.00168573	0.00842034	0.00501939	FGFR2/SEMA5A/SMURF2/SULF1/GPC5/KANK1/RBPJ/CDC73/WLS/YAP1/GPRC5B/TBL1X	12
BP	GO:0031644	regulation of neurological system process	12/442	59/5658	0.00168573	0.00842034	0.00501939	CCK/NLGN1/AGT/NLGN4X/FGF12/S100B/PARD3/NRXN1/DICER1/IGSF11/HGF/ADORA1	12
BP	GO:0099003	vesicle-mediated transport in synapse	12/442	59/5658	0.00168573	0.00842034	0.00501939	NLGN1/ACTG1/NLGN4X/CASK/DNM2/SYT1/RAP1B/OPHN1/ACTB/ADORA2B/DNM3/AP3B1	12
BP	GO:0010771	negative regulation of cell morphogenesis involved in differentiation	10/442	44/5658	0.00168614	0.00842034	0.00501939	MT3/SEMA5A/NLGN1/DAB1/NRP1/SEMA3E/KANK1/ID1/DNM3/FBLN1	10
BP	GO:0043502	regulation of muscle adaptation	10/442	44/5658	0.00168614	0.00842034	0.00501939	PRKCA/NR4A3/CAMK2G/AGT/JARID2/FOXO1/IL6ST/PPARGC1A/ATP2B4/UTRN	10
BP	GO:0072028	nephron morphogenesis	10/442	44/5658	0.00168614	0.00842034	0.00501939	PDGFRB/AGT/HES5/FGF2/SOX9/FGF1/STAT1/DLG1/PKD2/PTCH1	10
BP	GO:1903426	regulation of reactive oxygen species biosynthetic process	10/442	44/5658	0.00168614	0.00842034	0.00501939	HSP90AA1/CLU/AGT/FYN/DNM2/STAT3/RGN/ATP2B4/PKD2/CFLAR	10
BP	GO:0010951	negative regulation of endopeptidase activity	17/442	100/5658	0.00169534	0.00844552	0.0050344	MT3/PEBP1/AGT/SERPINE2/BST2/SORL1/WFDC1/AQP1/SH3RF1/C5/YWHAE/IFI6/BIRC2/HGF/CAST/COL4A3/CFLAR	17
BP	GO:0046883	regulation of hormone secretion	17/442	100/5658	0.00169534	0.00844552	0.0050344	GJA1/PRKCA/GLUL/MAP4K4/TCF7L2/CD38/AGT/ITPR2/LRP1/ADCY8/HIF1A/NR1D1/HMGN3/TIAM1/FGFR1/SRI/ADORA1	17
BP	GO:0014066	regulation of phosphatidylinositol 3-kinase signaling	13/442	67/5658	0.00172485	0.00854023	0.00509086	PDGFRB/AGT/FYN/SERPINE2/SOX9/GAB1/TGFB2/ANGPT1/TSC2/STAMBP/FGFR1/PDGFC/HGF	13
CC	GO:0030135	coated vesicle	19/441	121/5894	0.00147986	0.00856348	0.00552482	APOE/TFRC/MYO1E/LRP1/TF/TNK2/B2M/PIK3C2A/CD9/DNM2/SYT1/ADCY8/HIP1R/HIP1/AP3B1/ARFGAP3/HSPA8/EPN2/HLA-E	19
BP	GO:0050778	positive regulation of immune response	43/442	351/5658	0.00173873	0.00859846	0.00512556	HSPA1A/HSP90AA1/HSPA1B/CLU/TFRC/NR4A3/CADM1/PLSCR1/CD38/DOCK1/ACTG1/GAB2/FYN/VAV3/B2M/S100A1/ITCH/PTPRJ/PRNP/LGALS3/TGFB2/IL33/MYO10/UBB/RPS27A/WASF2/ACTB/RPS6KA5/SEC14L1/ABI1/IL6ST/GPRC5B/MEF2C/UBC/ADORA2B/VAV2/NR1D1/APPL2/C5/IL6R/TAB2/BIRC2/HLA-E	43
BP	GO:0045444	fat cell differentiation	18/442	109/5658	0.00176133	0.00869964	0.00518588	ID2/NR4A3/TCF7L2/NR4A2/STK3/ZFP36L1/ZFP36/PRDM16/NR4A1/WIF1/FOXO1/PPARGC1A/ITGA6/ID4/WWTR1/ZBTB7C/NR1D1/SH3PXD2B	18
BP	GO:0032535	regulation of cellular component size	23/442	154/5658	0.00176733	0.00871869	0.00519724	APOE/MT3/TMSB4X/SEMA5A/CFL1/LRP1/PREX1/VAV3/NRP1/FN1/SEMA3E/DNM2/GSN/MSN/DSCAM/KANK1/AQP1/HIP1R/ELN/DLG1/HP1BP3/VAV2/RICTOR	23
BP	GO:0007224	smoothened signaling pathway	11/442	52/5658	0.00186891	0.00906579	0.00540414	FGFR2/HES5/GLI2/CTNNA1/SERPINE2/PRRX1/INTU/GPR37L1/HIPK2/TULP3/PTCH1	11
BP	GO:0090100	positive regulation of transmembrane receptor protein serine/threonine kinase signaling pathway	11/442	52/5658	0.00186891	0.00906579	0.00540414	HES5/BMPR1A/RBPMS/SULF1/ZNF423/TGFB2/NEO1/RBPJ/HIPK2/TGFB3/TGFBR3	11
BP	GO:2000177	regulation of neural precursor cell proliferation	11/442	52/5658	0.00186891	0.00906579	0.00540414	ID2/PTPRZ1/PTN/GLI2/CTNNA1/PTBP2/GPR37L1/FOXO1/LHX2/HIF1A/APPL2	11
BP	GO:0043062	extracellular structure organization	32/442	241/5658	0.00188177	0.00910642	0.00542836	APOE/MYO1E/AGT/TNC/LRP1/ANTXR1/FGF2/SULF1/FN1/SOX9/LAMA1/TGFB2/HPSE2/NCAN/BCAN/ADAM10/DDR2/ITGA6/ITGB8/ABCA1/ELN/ITGAV/SDC4/SH3PXD2B/ADAMTS9/HTRA1/VCAN/FBN2/CAPN2/FBLN1/COL4A3/CFLAR	32
BP	GO:0044257	cellular protein catabolic process	32/442	241/5658	0.00188177	0.00910642	0.00542836	HSPA1A/APOE/HSP90AA1/HSPA1B/CLU/GABARAPL2/LRP1/SMURF2/PML/ITCH/MSN/IL33/UBB/SMARCC1/RPS27A/RNF213/OPHN1/CSNK1A1/RGN/HIPK2/ZNRF3/UBC/WWTR1/TBL1X/HSPA5/NR1D1/GNA12/UBAP1/VPS28/CTSH/BIRC2/CAPN2	32
MF	GO:0032559	adenyl ribonucleotide binding	55/438	470/5628	0.00110383	0.00911498	0.00646103	HSPA1A/HSP90AA1/HSPA1B/FGFR2/PRKCA/GLUL/CAMK2G/PDGFRB/PEBP1/MAP4K4/MYO1E/STK3/BMPR1B/BMPR1A/ACTG1/MINK1/TAOK3/EPHA6/MAP3K5/FYN/TNIK/PRKG1/TNK2/ABCD4/PIK3C2A/RPS6KA2/CASK/DDX5/FGFR3/MYO10/CSNK1A1/ACTB/MYO18A/ADCY8/ENTPD1/RPS6KA5/MAP3K14/EPHB1/DDR2/ABCA1/ABCC4/KSR1/HIPK2/MERTK/ATP2B4/ATM/HSPA5/DICER1/JAK1/STK10/FGFR1/MYO9B/NEK7/HSPA8/MYO16	55
BP	GO:0051017	actin filament bundle assembly	14/442	76/5658	0.00195607	0.00943019	0.00562136	STMN1/DLC1/ARHGEF10/NRP1/WASF2/SORBS1/ID1/ELN/NEDD9/SDC4/SH3PXD2B/S1PR1/TGFB3/ARHGEF10L	14
BP	GO:0051099	positive regulation of binding	14/442	76/5658	0.00195607	0.00943019	0.00562136	APOE/STMN1/TCF7L2/STK3/HMBOX1/LRP1/NRP1/B2M/LGALS3/HIP1R/MEF2C/HIPK2/TIAM1/SPON1	14
BP	GO:0061572	actin filament bundle organization	14/442	76/5658	0.00195607	0.00943019	0.00562136	STMN1/DLC1/ARHGEF10/NRP1/WASF2/SORBS1/ID1/ELN/NEDD9/SDC4/SH3PXD2B/S1PR1/TGFB3/ARHGEF10L	14
BP	GO:0051216	cartilage development	18/442	110/5658	0.00195795	0.00943019	0.00562136	BMPR1B/HES5/BMPR1A/CHI3L1/FGF2/GLI2/SULF1/SOX9/PRRX1/ZEB1/EFEMP1/FGFR3/ITGB8/MEF2C/HIF1A/CHST11/NFIB/FGFR1	18
BP	GO:0034332	adherens junction organization	13/442	68/5658	0.00198488	0.00954855	0.00569192	APOD/CADM1/MAP4K4/DLC1/LIMS1/LRP1/CTNNA1/CDH13/NRP1/PTPRJ/SORBS1/SDC4/IQGAP1	13
BP	GO:0046879	hormone secretion	19/442	119/5658	0.00199229	0.0095729	0.00570643	GJA1/PRKCA/GLUL/CAMK2G/MAP4K4/TCF7L2/CD38/AGT/ITPR2/LRP1/CPE/ADCY8/HIF1A/NR1D1/HMGN3/TIAM1/FGFR1/SRI/ADORA1	19
BP	GO:0014032	neural crest cell development	10/442	45/5658	0.00202019	0.00969548	0.0057795	SEMA5A/CFL1/BMPR1A/PHACTR4/NRP1/FN1/SOX9/SEMA3E/NRG1/HIF1A	10
MF	GO:0017124	SH3 domain binding	13/438	65/5628	0.00124424	0.0101211	0.0071742	GJA1/DOCK4/PLSCR1/DOCK1/DNM2/DTX1/WASF2/FUT8/ARHGAP31/ADAM10/ABI1/HIP1R/ARHGAP17	13
BP	GO:2000377	regulation of reactive oxygen species metabolic process	15/442	85/5658	0.00213571	0.0101898	0.00607415	HSP90AA1/MT3/CLU/PDGFRB/AGT/FYN/DNM2/STAT3/RGN/FOXO1/HIF1A/ATP2B4/PKD2/BIRC2/CFLAR	15
MF	GO:0030554	adenyl nucleotide binding	55/438	473/5628	0.00128295	0.0102824	0.00728856	HSPA1A/HSP90AA1/HSPA1B/FGFR2/PRKCA/GLUL/CAMK2G/PDGFRB/PEBP1/MAP4K4/MYO1E/STK3/BMPR1B/BMPR1A/ACTG1/MINK1/TAOK3/EPHA6/MAP3K5/FYN/TNIK/PRKG1/TNK2/ABCD4/PIK3C2A/RPS6KA2/CASK/DDX5/FGFR3/MYO10/CSNK1A1/ACTB/MYO18A/ADCY8/ENTPD1/RPS6KA5/MAP3K14/EPHB1/DDR2/ABCA1/ABCC4/KSR1/HIPK2/MERTK/ATP2B4/ATM/HSPA5/DICER1/JAK1/STK10/FGFR1/MYO9B/NEK7/HSPA8/MYO16	55
BP	GO:0003007	heart morphogenesis	21/442	138/5658	0.00218499	0.0103399	0.00616364	ID2/FGFR2/GJA1/DLC1/BMPR1A/CPE/ZMIZ1/NRP1/SOX9/JUN/TGFB2/RBPJ/NRG1/YAP1/ELN/MEF2C/HIF1A/S1PR1/PKD2/TGFBR3/PTCH1	21
BP	GO:0014020	primary neural tube formation	11/442	53/5658	0.00219674	0.0103714	0.0061824	DLC1/CFL1/PHACTR4/TGFB2/TSC2/LHX2/HIF1A/SDC4/TULP3/PTCH1/ARID1A	11
BP	GO:0035195	gene silencing by miRNA	11/442	53/5658	0.00219674	0.0103714	0.0061824	ZFP36/HNRNPA2B1/NEAT1/NCOR2/TPR/DDX5/STAT3/DICER1/POLR2L/NUP160/POLR2J	11
BP	GO:0031214	biomineral tissue development	14/442	77/5658	0.00222463	0.0104787	0.00624639	FGFR2/GJA1/PTN/BMPR1B/BMPR1A/SOX9/FGFR3/FOXO1/DDR2/MEF2C/HIF1A/S1PR1/TGFB3/FBN2	14
BP	GO:1903050	regulation of proteolysis involved in cellular protein catabolic process	14/442	77/5658	0.00222463	0.0104787	0.00624639	HSPA1A/APOE/HSPA1B/CLU/GABARAPL2/PML/IL33/UBB/SMARCC1/OPHN1/CSNK1A1/RGN/HIPK2/GNA12	14
BP	GO:0050900	leukocyte migration	29/442	214/5658	0.00223046	0.010494	0.00625551	APOD/PTN/SLC7A11/CCL2/CXCL14/PPIA/FYN/PREX1/DUSP1/SLC3A2/VAV3/FN1/CD9/MSN/LGALS3/TGFB2/IL33/ANGPT1/ADAM10/ITGA6/ITGAV/MERTK/SDC4/C5/IL6R/S1PR1/STK10/ADORA1/DDT	29
CC	GO:0005769	early endosome	21/441	142/5894	0.00185392	0.0105869	0.00683025	APOE/GJA1/TFRC/LDLRAD4/LRP1/TF/ZFYVE16/NRP1/B2M/PML/ITCH/WASF2/SORL1/EPHB1/WLS/STAMBP/APPL2/DIAPH2/VPS28/TRAK1/HLA-E	21
BP	GO:0048878	chemical homeostasis	51/442	440/5658	0.00225617	0.0106027	0.00632029	APOE/MT3/GJA1/STMN1/TFRC/CCK/MAP4K4/TCF7L2/CD38/AGT/SLC7A11/ITPR2/LRP1/TF/SLC9A9/FYN/FGF2/B2M/PML/PRNP/STAT3/NEO1/UBASH3B/FGF12/ADCY8/RGN/PLCE1/AQP1/FOXO1/PPARGC1A/ABCA1/HIF1A/ITGAV/ATP6V0E1/ATP2B4/RPS6/STAT1/NR1D1/HMGN3/APPL2/SLC4A4/S1PR1/YWHAE/TIAM1/IFI6/PKD2/SRI/CTSH/ADORA1/PTCH1/NR1H2	51
BP	GO:0014074	response to purine-containing compound	13/442	69/5658	0.00227639	0.010673	0.00636222	FOS/ZFP36L1/ITPR2/JUND/DUSP1/JUN/RAP1B/AQP1/PPARGC1A/STAT1/HSPA5/PKD2/BIRC2	13
BP	GO:0071236	cellular response to antibiotic	13/442	69/5658	0.00227639	0.010673	0.00636222	CLU/NR4A3/ITPR2/MAP3K5/PSAP/EGR1/ADCY8/GPR37L1/AQP1/FOXO1/MEF2C/HSPA5/HGF	13
CC	GO:0005938	cell cortex	20/441	133/5894	0.00192584	0.0107209	0.00691673	FGFR2/DLC1/CFL1/ENO1/ITPR2/AKAP13/GSN/MYO10/FGF1/ACTB/PARD3/HIP1R/NEDD9/HIP1/UTRN/ASPH/MYO9B/PKD2/TRAK1/CAPN2	20
BP	GO:0010466	negative regulation of peptidase activity	17/442	103/5658	0.00235574	0.0109943	0.00655376	MT3/PEBP1/AGT/SERPINE2/BST2/SORL1/WFDC1/AQP1/SH3RF1/C5/YWHAE/IFI6/BIRC2/HGF/CAST/COL4A3/CFLAR	17
BP	GO:0030705	cytoskeleton-dependent intracellular transport	10/442	46/5658	0.00240562	0.0111933	0.00667236	HSPB1/TUBA1A/MYO10/UBB/HIF1A/ARHGAP21/TUBA1B/AP3B1/TRAK1/HSPA8	10
BP	GO:0033500	carbohydrate homeostasis	15/442	86/5658	0.00240663	0.0111933	0.00667236	MAP4K4/TCF7L2/LRP1/STAT3/ADCY8/FOXO1/PPARGC1A/HIF1A/RPS6/NR1D1/HMGN3/APPL2/TIAM1/SRI/PTCH1	15
BP	GO:0042593	glucose homeostasis	15/442	86/5658	0.00240663	0.0111933	0.00667236	MAP4K4/TCF7L2/LRP1/STAT3/ADCY8/FOXO1/PPARGC1A/HIF1A/RPS6/NR1D1/HMGN3/APPL2/TIAM1/SRI/PTCH1	15
BP	GO:0009914	hormone transport	19/442	121/5658	0.00242669	0.0112737	0.0067203	GJA1/PRKCA/GLUL/CAMK2G/MAP4K4/TCF7L2/CD38/AGT/ITPR2/LRP1/CPE/ADCY8/HIF1A/NR1D1/HMGN3/TIAM1/FGFR1/SRI/ADORA1	19
BP	GO:0007186	G protein-coupled receptor signaling pathway	42/442	347/5658	0.00247538	0.0114086	0.00680071	APOE/STMN1/PRKCA/GNA14/PDGFRB/CCK/GABRB1/PREX2/AGT/AKAP13/LRP1/CPE/CCL2/RGS20/PREX1/GABRG1/VAV3/RGS6/PSAP/PDE1A/GNG7/RAMP1/SST/WASF2/ADCY8/GPR37L1/RGS16/PARD3/PLCE1/ABCA1/GPRC5B/ATP2B4/ADORA2B/VAV2/GNAO1/GNA12/C5/S1PR1/TIAM1/TULP3/FRS2/ADORA1	42
CC	GO:0005768	endosome	43/441	370/5894	0.00213577	0.0115866	0.00747521	APOE/GJA1/TFRC/LDLRAD4/LRP1/ANTXR1/TF/TMBIM1/SLC9A9/FYN/ZFYVE16/TNIK/TNK2/NRP1/TUBA1A/B2M/PML/CD63/PSAP/ITCH/DNM2/BST2/UBB/RPS27A/NDRG1/WASF2/SORL1/EPHB1/ABCA1/WLS/ATP6V0E1/UBC/STAMBP/APPL2/UBAP1/JAK1/S1PR1/DIAPH2/VPS28/TAB2/CTSH/TRAK1/HLA-E	43
CC	GO:0030662	coated vesicle membrane	14/441	80/5894	0.00216476	0.0115988	0.00748311	APOE/TFRC/TF/B2M/CD9/SYT1/ADCY8/HIP1R/HIP1/AP3B1/ARFGAP3/HSPA8/EPN2/HLA-E	14
BP	GO:0019058	viral life cycle	21/442	140/5658	0.00261563	0.0120006	0.00715359	HSPA1A/APOE/HSPA1B/TFRC/PLSCR1/CCL2/PPIA/PML/TPR/ITCH/DDX5/GSN/SLC20A2/BST2/UBB/RPS27A/ITGAV/UBC/UBAP1/NUP160/VPS28	21
BP	GO:0046330	positive regulation of JNK cascade	12/442	62/5658	0.00262569	0.0120196	0.00716492	STK3/GADD45B/MINK1/TAOK3/MAP3K5/TNIK/SPAG9/SH3RF1/SASH1/HIPK2/TPD52L1/TIAM1	12
BP	GO:1902904	negative regulation of supramolecular fiber organization	12/442	62/5658	0.00262569	0.0120196	0.00716492	APOE/TMSB4X/STMN1/CLU/APC/DLC1/GSN/KANK1/WASF2/HIP1R/S1PR1/HSPA8	12
BP	GO:0043254	regulation of protein complex assembly	23/442	159/5658	0.00270327	0.0123608	0.00736833	HSPA1A/APOE/HSP90AA1/HSPA1B/TMSB4X/STMN1/CLU/LDLRAD4/CCK/PREX1/JUN/GSN/MSN/KANK1/SORL1/HIP1R/ABCA1/ELN/ATM/DLG1/RICTOR/BIRC2/HSPA8	23
BP	GO:0030198	extracellular matrix organization	29/442	217/5658	0.00275468	0.0125818	0.00750002	MYO1E/AGT/TNC/LRP1/ANTXR1/FGF2/SULF1/FN1/SOX9/LAMA1/TGFB2/HPSE2/NCAN/BCAN/ADAM10/DDR2/ITGA6/ITGB8/ELN/ITGAV/SH3PXD2B/ADAMTS9/HTRA1/VCAN/FBN2/CAPN2/FBLN1/COL4A3/CFLAR	29
BP	GO:0008015	blood circulation	30/442	227/5658	0.00278156	0.0126903	0.00756471	APOE/ID2/GJA1/DOCK4/CD38/AGT/ITPR2/PRKG1/PIK3C2A/S100A1/PTPRJ/TGFB2/ANGPT1/FGF12/GPR37L1/ELN/PTPRM/ATP2B4/ADORA2B/STAT1/DLG1/GNAO1/NAMPT/YWHAE/ASPH/SRI/DOCK5/AR/ADORA1/COL4A3	30
MF	GO:0008083	growth factor activity	14/438	75/5628	0.00165362	0.0126932	0.00899743	PTN/AGT/FGF2/EFEMP1/TGFB2/FGF1/FGF12/OSGIN2/NRG1/IL6R/TGFB3/PDGFC/HGF/NRG3	14
BP	GO:0033044	regulation of chromosome organization	16/442	96/5658	0.00283047	0.012899	0.00768911	APC/HMBOX1/HNRNPA2B1/DUSP1/WBP2/PML/TPR/TET1/RPS6KA5/JARID2/PPARGC1A/TADA3/ATM/HNRNPD/BCL6/NEK7	16
BP	GO:0048864	stem cell development	10/442	47/5658	0.00284791	0.0129349	0.00771054	SEMA5A/CFL1/BMPR1A/PHACTR4/NRP1/FN1/SOX9/SEMA3E/NRG1/HIF1A	10
BP	GO:0090263	positive regulation of canonical Wnt signaling pathway	10/442	47/5658	0.00284791	0.0129349	0.00771054	FGFR2/SEMA5A/SMURF2/GPC5/KANK1/RBPJ/WLS/YAP1/GPRC5B/TBL1X	10
BP	GO:1903035	negative regulation of response to wounding	10/442	47/5658	0.00284791	0.0129349	0.00771054	APOE/GJA1/FGF2/PRKG1/SERPINE2/CD9/CASK/UBASH3B/WFDC1/ADAMTS18	10
BP	GO:0016441	posttranscriptional gene silencing	11/442	55/5658	0.00299229	0.0135453	0.00807437	ZFP36/HNRNPA2B1/NEAT1/NCOR2/TPR/DDX5/STAT3/DICER1/POLR2L/NUP160/POLR2J	11
BP	GO:0035194	posttranscriptional gene silencing by RNA	11/442	55/5658	0.00299229	0.0135453	0.00807437	ZFP36/HNRNPA2B1/NEAT1/NCOR2/TPR/DDX5/STAT3/DICER1/POLR2L/NUP160/POLR2J	11
BP	GO:0043535	regulation of blood vessel endothelial cell migration	11/442	55/5658	0.00299229	0.0135453	0.00807437	APOE/HSPB1/TMSB4X/PRKCA/FGF2/NRP1/PIK3C2A/ANGPT1/MEF2C/HIF1A/FGFR1	11
MF	GO:0017048	Rho GTPase binding	15/438	84/5628	0.00182025	0.0135895	0.00963274	DOCK4/PREX2/ARHGEF10/DOCK1/AKAP13/PREX1/VAV3/SRGAP1/VAV2/ARHGAP17/DIAPH2/TIAM1/IQGAP1/ARHGEF10L/MYO9B	15
BP	GO:0008037	cell recognition	12/442	63/5658	0.00302028	0.0136265	0.00812278	CADM1/SEMA5A/NRP1/CD9/MSN/DSCAM/LGALS3/EPHB1/MFGE8/DLG1/MEGF10/VCAN	12
BP	GO:0046683	response to organophosphorus	12/442	63/5658	0.00302028	0.0136265	0.00812278	FOS/ZFP36L1/ITPR2/JUND/DUSP1/JUN/RAP1B/AQP1/STAT1/HSPA5/PKD2/BIRC2	12
BP	GO:0043603	cellular amide metabolic process	40/442	330/5658	0.0030442	0.0137191	0.00817802	APOE/HSPB1/HSP90AA1/RPS15/CLU/SLC7A11/ZFP36L1/ZFP36/RPL18/CPE/RPL8/TOB1/RPS25/PSAP/TPR/PRNP/RPS27A/RPL28/STAT3/RPL10/RPL23A/SORL1/RPL37/ADAM10/RPLP2/ITGB8/RPS24/RPS6/RPL19/HNRNPD/RPS12/RPLP1/RPL12/SPON1/CTSH/RPL37A/ACER3/RPS9/HSPA8/RPL31	40
MF	GO:0002020	protease binding	12/438	60/5628	0.00189916	0.0139871	0.00991454	LRP1/F3/FN1/PSAP/PRNP/MBP/CRADD/ITGAV/UBC/SRI/CAST/CFLAR	12
BP	GO:0006816	calcium ion transport	25/442	180/5658	0.00315996	0.0140693	0.00838673	GJA1/CAMK2G/PDGFRB/AGT/IL1RAPL1/ITPR2/CCL2/FYN/FGF2/SLC3A2/S100A1/PML/CASK/PRNP/LGALS3/RAMP1/UBASH3B/RGN/PLCE1/ITGAV/ATP2B4/GNAO1/YWHAE/PKD2/SRI	25
BP	GO:0034622	cellular protein-containing complex assembly	38/442	310/5658	0.00316442	0.0140737	0.00838938	HSPA1A/HSP90AA1/HSPA1B/TMSB4X/STMN1/RPS15/CLU/LDLRAD4/PREX1/SOX9/PIK3C2A/GSN/UBB/RPS27A/KANK1/RPL10/SRSF6/PTBP2/ANGPT1/RPL23A/SF1/HIP1R/CDC73/NRG1/ELN/UBC/ATM/DLG1/HP1BP3/DICER1/HIP1/RPL12/RICTOR/PDGFC/NRG3/TGFBR3/BAZ2A/PRPF6	38
MF	GO:0031267	small GTPase binding	24/438	166/5628	0.00210781	0.014652	0.0103859	DOCK4/PREX2/ARHGEF10/DOCK1/AKAP13/RIN2/TBC1D22A/PREX1/VAV3/SRGAP1/NDRG1/GDI2/SORL1/TSC2/PLCE1/ABCA1/VAV2/ARHGAP17/DIAPH2/TIAM1/IQGAP1/ARHGEF10L/MYO9B/RGL3	24
BP	GO:0001678	cellular glucose homeostasis	10/442	48/5658	0.00335284	0.0147984	0.00882134	MAP4K4/LRP1/ADCY8/FOXO1/PPARGC1A/HIF1A/NR1D1/HMGN3/TIAM1/SRI	10
BP	GO:0007034	vacuolar transport	10/442	48/5658	0.00335284	0.0147984	0.00882134	HSPA1A/CLU/LRP1/ZFYVE16/PSAP/SORL1/VPS28/AP3B1/TRAK1/HSPA8	10
BP	GO:0014031	mesenchymal cell development	10/442	48/5658	0.00335284	0.0147984	0.00882134	SEMA5A/CFL1/BMPR1A/PHACTR4/NRP1/FN1/SOX9/SEMA3E/NRG1/HIF1A	10
BP	GO:0071322	cellular response to carbohydrate stimulus	10/442	48/5658	0.00335284	0.0147984	0.00882134	MAP4K4/ZFP36L1/LRP1/ADCY8/PPARGC1A/HIF1A/NR1D1/HMGN3/TIAM1/SRI	10
BP	GO:0051603	proteolysis involved in cellular protein catabolic process	29/442	220/5658	0.00338075	0.0149054	0.00888514	HSPA1A/APOE/HSPA1B/CLU/GABARAPL2/SMURF2/PML/ITCH/IL33/UBB/SMARCC1/RPS27A/RNF213/OPHN1/CSNK1A1/RGN/HIPK2/ZNRF3/UBC/WWTR1/TBL1X/HSPA5/NR1D1/GNA12/UBAP1/VPS28/CTSH/BIRC2/CAPN2	29
BP	GO:0042476	odontogenesis	12/442	64/5658	0.00346161	0.0152449	0.00908754	FGFR2/TNC/BMPR1A/GLI2/CTNNA1/TGFB2/AQP1/FOXO1/ITGA6/GNAO1/HTRA1/TGFB3	12
BP	GO:0030534	adult behavior	11/442	56/5658	0.00346902	0.0152449	0.00908754	ID2/NR4A3/NRXN3/PREX2/NR4A2/SLC7A11/NLGN4X/DAB1/FGF12/NRXN1/HIPK2	11
BP	GO:1904375	regulation of protein localization to cell periphery	11/442	56/5658	0.00346902	0.0152449	0.00908754	GPC6/LRP1/TMBIM1/PRNP/LGALS3/ACTB/ADAM10/SORBS1/DLG1/PPP2R5A/AR	11
BP	GO:0001818	negative regulation of cytokine production	20/442	134/5658	0.00347712	0.0152641	0.00909894	TMSB4X/APOD/ZFP36/FN1/PML/ITCH/PRNP/BST2/TGFB2/IL33/ANGPT1/NDRG2/RPS6KA5/MERTK/DICER1/APPL2/BCL6/TGFB3/FGFR1/HGF	20
BP	GO:0097237	cellular response to toxic substance	17/442	107/5658	0.0035588	0.0156057	0.00930263	APOE/MT3/NR4A3/ITPR2/MAP3K5/B2M/PSAP/DNM2/EGR1/ACTB/GPR37L1/RGN/AQP1/FOXO1/PPARGC1A/HGF/PRDX1	17
BP	GO:0051222	positive regulation of protein transport	24/442	172/5658	0.00356907	0.0156339	0.00931942	GJA1/GLUL/CADM1/TCF7L2/CD38/LRP1/PPIA/FYN/TPR/PRNP/TGFB2/IL33/MBP/SORL1/MYO18A/ADCY8/WLS/HIF1A/C5/VPS28/YWHAE/TGFB3/SRI/HLA-E	24
BP	GO:0071496	cellular response to external stimulus	22/442	153/5658	0.00357554	0.0156454	0.00932626	GJA1/FOS/GLUL/PTN/NR4A2/AGT/TNC/GABARAPL2/MAP3K5/FYN/SOX9/JUN/FAS/CRADD/MAP3K14/AQP1/FOXO1/ITGA6/ADORA2B/HSPA5/NAMPT/HSPA8	22
BP	GO:0048592	eye morphogenesis	14/442	81/5658	0.00362153	0.0158296	0.00943606	PTN/PHACTR4/SOX9/ZEB1/EFEMP1/DSCAM/STAT3/EPHB1/HIF1A/HIPK2/PTPRM/FRS2/FBN2/ARID1A	14
BP	GO:0007517	muscle organ development	25/442	182/5658	0.00366903	0.0159685	0.00951889	FGFR2/GJA1/FOS/BMPR1A/CNTFR/FGF2/DDX5/TGFB2/EGR1/S100B/JARID2/RBPJ/EPHB1/NRG1/YAP1/ELN/MEF2C/S1PR1/MEGF10/UTRN/FGFR1/FRS2/SRI/TGFBR3/CFLAR	25
BP	GO:0050877	nervous system process	42/442	355/5658	0.00378601	0.0163772	0.00976247	APOE/FOS/NR4A3/PTPRZ1/NRXN3/CCK/GABRB1/PTN/NLGN1/AGT/SLC7A11/MEIS2/CCL2/FYN/GABRG1/NLGN4X/SERPINE2/B2M/JUN/PSAP/PRNP/EFEMP1/RLBP1/MBP/FGF12/ADCY8/RGS16/S100B/PARD3/EPHB1/NRXN1/MEF2C/HIF1A/SLC1A3/TBL1X/DICER1/IGSF11/S1PR1/FGFR1/HGF/ADORA1/COL4A3	42
BP	GO:0009126	purine nucleoside monophosphate metabolic process	13/442	73/5658	0.00381529	0.0163772	0.00976247	HSPA1A/HSPA1B/TMSB4X/ENO1/CASK/TPR/STAT3/PPARGC1A/HIF1A/DDIT4/DLG1/NUP160/HSPA8	13
BP	GO:0009167	purine ribonucleoside monophosphate metabolic process	13/442	73/5658	0.00381529	0.0163772	0.00976247	HSPA1A/HSPA1B/TMSB4X/ENO1/CASK/TPR/STAT3/PPARGC1A/HIF1A/DDIT4/DLG1/NUP160/HSPA8	13
BP	GO:0014013	regulation of gliogenesis	13/442	73/5658	0.00381529	0.0163772	0.00976247	ID2/PTPRZ1/PTN/HES5/LRP1/DAB1/SERPINE2/GPR37L1/IL6ST/ID4/DICER1/NR1D1/TIAM1	13
BP	GO:0032874	positive regulation of stress-activated MAPK cascade	13/442	73/5658	0.00381529	0.0163772	0.00976247	STK3/GADD45B/MINK1/TAOK3/MAP3K5/TNIK/TGFB2/SPAG9/SH3RF1/SASH1/HIPK2/TPD52L1/TIAM1	13
BP	GO:1990845	adaptive thermogenesis	13/442	73/5658	0.00381529	0.0163772	0.00976247	GJA1/APC/ALDH1A1/PRDM16/ZNF423/SORL1/RBPJ/PPARGC1A/ID1/NR1D1/APPL2/PDGFC/NR1H2	13
BP	GO:0001819	positive regulation of cytokine production	28/442	212/5658	0.00384113	0.0164707	0.00981822	HSPA1A/HSPB1/HSPA1B/CLU/NR4A3/CADM1/AGT/LRP1/SULF1/B2M/PTPRJ/IL33/STAT3/EGR1/MBP/SEC14L1/IL6ST/GPRC5B/HIF1A/ADORA2B/STAT1/POLR2L/C5/IL6R/BIRC2/HGF/DDT/HLA-E	28
BP	GO:0002793	positive regulation of peptide secretion	19/442	126/5658	0.00387198	0.0165506	0.00986584	GJA1/GLUL/CADM1/TCF7L2/CD38/LRP1/PPIA/TGFB2/IL33/MBP/MYO18A/ADCY8/WLS/HIF1A/C5/TGFB3/SRI/ADORA1/HLA-E	19
BP	GO:0048839	inner ear development	16/442	99/5658	0.00388901	0.0166059	0.00989883	FGFR2/NR4A3/PDGFRB/HES5/CXCL14/GLI2/SOX9/PRRX1/PSAP/ZEB1/TGFB2/ADAM10/RBPJ/SDC4/TGFB3/FGFR1	16
BP	GO:0001708	cell fate specification	10/442	49/5658	0.00392643	0.016713	0.00996269	APC/BMPR1A/FGF2/GLI2/NRP1/SOX9/RBPJ/FGFR1/AR/PTCH1	10
BP	GO:0015980	energy derivation by oxidation of organic compounds	10/442	49/5658	0.00392643	0.016713	0.00996269	MT3/NR4A3/PRDM16/PPP1R3C/SORBS1/IL6ST/PPARGC1A/GBE1/HIF1A/NR1D1	10
BP	GO:0030518	intracellular steroid hormone receptor signaling pathway	10/442	49/5658	0.00392643	0.016713	0.00996269	NCOR2/WBP2/DDX5/NCOA6/PPARGC1A/YAP1/TADA3/PRMT2/AR/ARID1A	10
MF	GO:0005088	Ras guanyl-nucleotide exchange factor activity	11/438	54/5628	0.0024935	0.0168374	0.011935	PREX2/ARHGEF10/DOCK1/AKAP13/RIN2/PREX1/VAV3/VAV2/TIAM1/ARHGEF10L/RGL3	11
BP	GO:0008277	regulation of G protein-coupled receptor signaling pathway	11/442	57/5658	0.00400473	0.016993	0.0101295	STMN1/PRKCA/RGS20/RGS6/DNM2/GNG7/RAMP1/RGS16/PLCE1/ATP2B4/TULP3	11
BP	GO:0034249	negative regulation of cellular amide metabolic process	11/442	57/5658	0.00400473	0.016993	0.0101295	APOE/CLU/ZFP36L1/ZFP36/TOB1/TPR/PRNP/STAT3/SORL1/HNRNPD/SPON1	11
BP	GO:1901343	negative regulation of vasculature development	11/442	57/5658	0.00400473	0.016993	0.0101295	PTN/AGT/SULF1/PML/SEMA3E/TGFB2/PTPRM/STAT1/ADAMTS9/COL4A3/EPN2	11
BP	GO:0006412	translation	26/442	193/5658	0.0040226	0.017051	0.0101641	HSPB1/RPS15/ZFP36L1/ZFP36/RPL18/RPL8/TOB1/RPS25/TPR/RPS27A/RPL28/STAT3/RPL10/RPL23A/RPL37/RPLP2/RPS24/RPS6/RPL19/HNRNPD/RPS12/RPLP1/RPL12/RPL37A/RPS9/RPL31	26
BP	GO:0002694	regulation of leukocyte activation	32/442	253/5658	0.00408331	0.0172903	0.0103068	ID2/TFRC/NR4A3/PLSCR1/CD38/ZFP36L1/GAB2/CCL2/FYN/GLI2/ZMIZ1/VAV3/ZEB1/GSN/PRNP/LGALS3/IL33/DTX1/MYO18A/IL6ST/SH3RF1/MEF2C/MERTK/SDC4/ATM/ADORA2B/DLG1/NR1D1/IL6R/BCL6/AP3B1/HLA-E	32
CC	GO:0005911	cell-cell junction	28/441	219/5894	0.00334971	0.0173068	0.0111657	GJA1/APC/CADM1/CFL1/MYO1E/LIMS1/PMP22/CTNNA1/CDH13/GAB1/CASK/PTPRJ/LAMA1/NDRG1/WASF2/RAP1B/PARD3/SORBS1/ITGA6/PTPRM/DLG1/IGSF11/SIPA1L3/ARHGAP17/TIAM1/IQGAP1/FRS2/PKD2	28
BP	GO:0007346	regulation of mitotic cell cycle	31/442	243/5658	0.00410969	0.0173839	0.0103626	HSPA1A/HSP90AA1/HSPA1B/ID2/PRKCA/APC/PDGFRB/ZFP36L1/MEIS2/TAOK3/CCL2/CCND3/DUSP1/PHIP/TUBA1A/PML/TPR/CRADD/CDC73/RPS6/ATM/DLG1/BCL6/YWHAE/IQGAP1/FGFR1/PKD2/PRMT2/NEK7/PTCH1/MYO16	31
CC	GO:0005740	mitochondrial envelope	14/441	84/5894	0.00345984	0.0176167	0.0113656	MT3/GJA1/PRKCA/CLU/SLC27A1/LGALS3/UBB/RPS27A/STAT3/UBC/TXNIP/IFI6/TRAK1/CAPN2	14
BP	GO:0030178	negative regulation of Wnt signaling pathway	15/442	91/5658	0.00422336	0.0178276	0.0106271	APOE/APC/TCF7L2/STK3/LRP1/SOX9/MCC/WIF1/EGR1/RNF213/CSNK1A1/TSC2/FOXO1/ZNRF3/WWTR1	15
BP	GO:0071229	cellular response to acid chemical	15/442	91/5658	0.00422336	0.0178276	0.0106271	FGFR2/TNC/FYN/SOX9/ZEB1/EGR1/AQP1/PPARGC1A/ABCA1/YAP1/ATM/HNRNPD/PKD2/CAPN2/PDGFC	15
BP	GO:0050714	positive regulation of protein secretion	18/442	118/5658	0.00430057	0.0180282	0.0107466	GJA1/GLUL/CADM1/TCF7L2/CD38/LRP1/PPIA/TGFB2/IL33/MBP/MYO18A/ADCY8/WLS/HIF1A/C5/TGFB3/SRI/HLA-E	18
BP	GO:0007219	Notch signaling pathway	16/442	100/5658	0.00430685	0.0180282	0.0107466	HES5/MAML2/ZMIZ1/SOX9/ZNF423/ITCH/TGFB2/DTX1/STAT3/ADAM10/RBPJ/IL6ST/STAT1/BCL6/KAT2B/EPN2	16
BP	GO:0003231	cardiac ventricle development	13/442	74/5658	0.00430891	0.0180282	0.0107466	ID2/FGFR2/BMPR1A/CPE/LTBP1/DNM2/TGFB2/RBPJ/NRG1/MEF2C/HIF1A/FRS2/TGFBR3	13
BP	GO:0030879	mammary gland development	13/442	74/5658	0.00430891	0.0180282	0.0107466	ID2/FGFR2/GJA1/GLI2/NCOR2/SOX9/PML/NRG1/HIF1A/TGFB3/NRG3/AR/PTCH1	13
BP	GO:0070304	positive regulation of stress-activated protein kinase signaling cascade	13/442	74/5658	0.00430891	0.0180282	0.0107466	STK3/GADD45B/MINK1/TAOK3/MAP3K5/TNIK/TGFB2/SPAG9/SH3RF1/SASH1/HIPK2/TPD52L1/TIAM1	13
BP	GO:0043043	peptide biosynthetic process	27/442	204/5658	0.00436347	0.018118	0.0108002	HSPB1/RPS15/SLC7A11/ZFP36L1/ZFP36/RPL18/RPL8/TOB1/RPS25/TPR/RPS27A/RPL28/STAT3/RPL10/RPL23A/RPL37/RPLP2/RPS24/RPS6/RPL19/HNRNPD/RPS12/RPLP1/RPL12/RPL37A/RPS9/RPL31	27
BP	GO:0016311	dephosphorylation	24/442	175/5658	0.00446986	0.0184093	0.0109738	PTPRD/PTPRZ1/CAMK2G/PDGFRB/DLC1/PTN/PPP1R3C/DUSP1/PHACTR4/PTPRJ/LGALS3/TGFB2/PTPRG/UBASH3B/PPP2R1B/RGN/PTPRT/MEF2C/PTPRM/DLG1/YWHAE/PPP2R5A/IQGAP1/ADORA1	24
BP	GO:0022411	cellular component disassembly	24/442	175/5658	0.00446986	0.0184093	0.0109738	STMN1/PRKCA/APC/SEMA5A/CFL1/GABARAPL2/LRP1/GSN/SMARCC1/CSNK1A1/TSC2/ADAM10/PPARGC1A/DDR2/HIF1A/DDIT4/DICER1/SH3PXD2B/HTRA1/ASPH/TGFB3/CAPN2/HSPA8/ARID1A	24
BP	GO:0021761	limbic system development	10/442	50/5658	0.00457497	0.0188041	0.0112092	FGFR2/NR4A3/DAB1/NRP1/UBB/BCAN/ID4/ATP2B4/YWHAE/FGFR1	10
BP	GO:0045639	positive regulation of myeloid cell differentiation	10/442	50/5658	0.00457497	0.0188041	0.0112092	HSPA1A/HSPA1B/ID2/FOS/PRKCA/ZFP36L1/JUN/STAT3/HIF1A/STAT1	10
BP	GO:0090596	sensory organ morphogenesis	19/442	128/5658	0.00462214	0.0189788	0.0113133	FGFR2/NR4A3/PTN/GLI2/PHACTR4/SOX9/PRRX1/ZEB1/EFEMP1/DSCAM/STAT3/EPHB1/HIF1A/HIPK2/PTPRM/FGFR1/FRS2/FBN2/ARID1A	19
MF	GO:0004721	phosphoprotein phosphatase activity	13/438	71/5628	0.0028676	0.0190591	0.0135098	PTPRD/PTPRZ1/CAMK2G/PPP1R3C/DUSP1/PTPRJ/PTPRG/UBASH3B/PPP2R1B/PTPRT/PTPRM/DLG1/PPP2R5A	13
CC	GO:0043202	lysosomal lumen	10/441	51/5894	0.00390747	0.019284	0.0124413	HSP90AA1/GPC6/PDGFRB/GPC5/PSAP/NCAN/BCAN/SDC4/VCAN/HSPA8	10
CC	GO:0044451	nucleoplasm part	43/441	382/5894	0.00391012	0.019284	0.0124413	HSPA1A/HSPA1B/TCF7L2/NR4A2/HMBOX1/DOCK1/SMURF2/MAML2/HNRNPA2B1/NEAT1/GLI2/ZMIZ1/NCOR2/PML/FAS/HNRNPM/DTX1/SRSF6/CSNK1A1/ACTB/NCOA6/JARID2/SF1/PPARGC1A/CDC73/MEF2C/TADA3/HIF1A/HIPK2/WWTR1/TBL1X/HP1BP3/NR1D1/POLR2L/NAMPT/EAF2/POLR2J/KAT2B/MORC3/AR/NCOA2/BAZ2A/PRPF6	43
CC	GO:0030141	secretory granule	39/441	339/5894	0.00407465	0.0198696	0.0128191	HSPA1A/HSP90AA1/HSPA1B/TMSB4X/CLU/CD38/ITPR2/LRP1/TF/CHI3L1/CPE/TMBIM1/PPIA/CTNNA1/SERPINE2/FN1/B2M/CD63/PSAP/CD9/PTPRJ/GSN/BST2/LGALS3/TGFB2/SYT1/RAP1B/GDI2/SPAG9/ADAM10/ABCC4/ITGAV/STK10/TGFB3/IQGAP1/SRI/CTSH/HGF/HSPA8	39
MF	GO:0005539	glycosaminoglycan binding	17/438	106/5628	0.00309297	0.0200675	0.0142246	APOE/FGFR2/SEMA5A/PTN/FGF2/SULF1/NRP1/SERPINE2/FN1/PRNP/FGF1/NCAN/BCAN/VCAN/FGFR1/TGFBR3/PTCH1	17
BP	GO:0002757	immune response-activating signal transduction	30/442	236/5658	0.00497856	0.0202379	0.0120638	HSPA1A/HSP90AA1/HSPA1B/NR4A3/PLSCR1/CD38/DOCK1/ACTG1/FYN/VAV3/S100A1/ITCH/PTPRJ/PRNP/LGALS3/MYO10/UBB/RPS27A/WASF2/ACTB/RPS6KA5/SEC14L1/ABI1/MEF2C/UBC/VAV2/NR1D1/APPL2/TAB2/BIRC2	30
CC	GO:0016604	nuclear body	34/441	286/5894	0.00428697	0.0206727	0.0133373	HSPA1A/HSPA1B/TCF7L2/NR4A2/HMBOX1/DOCK1/SMURF2/MAML2/HNRNPA2B1/NEAT1/GLI2/ZMIZ1/NCOR2/PML/FAS/HNRNPM/DTX1/SRSF6/CSNK1A1/SF1/PPARGC1A/MEF2C/HIF1A/HIPK2/WWTR1/HP1BP3/NR1D1/NAMPT/EAF2/MORC3/AR/NCOA2/BAZ2A/PRPF6	34
BP	GO:0051235	maintenance of location	21/442	148/5658	0.0051204	0.0207551	0.0123722	APOE/TMSB4X/ITPR2/SQLE/FGF2/LTBP1/PML/GSN/UBASH3B/SORL1/PLCE1/ABCA1/ITGAV/HSPA5/ARHGAP21/IGSF11/PKD2/MORC3/SRI/FBN2/NR1H2	21
CC	GO:0030665	clathrin-coated vesicle membrane	11/441	60/5894	0.00435417	0.020766	0.0133974	APOE/TFRC/TF/CD9/SYT1/ADCY8/HIP1R/HIP1/AP3B1/HSPA8/EPN2	11
BP	GO:0021537	telencephalon development	18/442	120/5658	0.00515515	0.0208307	0.0124172	ID2/NR4A3/SLC7A11/HES5/LRP1/DAB1/NRP1/BCAN/TACC1/AQP1/LHX2/NRG1/HIF1A/ID4/ATP2B4/NFIB/YWHAE/NRG3	18
BP	GO:0001894	tissue homeostasis	15/442	93/5658	0.00520928	0.0209617	0.0124953	HSPB1/PRKCA/TFRC/CD38/ACTG1/TF/SOX9/B2M/UBASH3B/ACTB/YAP1/WWTR1/S1PR1/CTSH/PRDX1	15
BP	GO:0031503	protein-containing complex localization	15/442	93/5658	0.00520928	0.0209617	0.0124953	GPC6/RPS15/NLGN1/HNRNPA2B1/TPR/DNM2/SRSF6/OPHN1/ADAM10/LGI1/ATM/DLG1/HIP1/NUP160/DNM3	15
BP	GO:0051495	positive regulation of cytoskeleton organization	15/442	93/5658	0.00520928	0.0209617	0.0124953	HSPA1A/HSPA1B/SEMA5A/CFL1/ARHGEF10/NRP1/GSN/HIP1R/ID1/SDC4/DLG1/SH3PXD2B/RICTOR/TGFB3/ARHGEF10L	15
BP	GO:0031047	gene silencing by RNA	11/442	59/5658	0.00527331	0.0209617	0.0124953	ZFP36/HNRNPA2B1/NEAT1/NCOR2/TPR/DDX5/STAT3/DICER1/POLR2L/NUP160/POLR2J	11
BP	GO:0043488	regulation of mRNA stability	11/442	59/5658	0.00527331	0.0209617	0.0124953	HSPA1A/HSPB1/PRKCA/ZFP36L1/ZFP36/HNRNPM/UBB/RPS27A/UBC/HNRNPD/HSPA8	11
MF	GO:0051020	GTPase binding	27/438	201/5628	0.00336209	0.0215569	0.0152803	HSP90AA1/DOCK4/PREX2/ARHGEF10/ENO1/DOCK1/AKAP13/RIN2/TBC1D22A/PREX1/VAV3/SRGAP1/NDRG1/GDI2/SORL1/TSC2/PLCE1/ABCA1/VAV2/ARHGAP17/DIAPH2/TIAM1/IQGAP1/ARHGEF10L/MYO9B/DOCK5/RGL3	27
BP	GO:0001701	in utero embryonic development	23/442	168/5658	0.00544625	0.021595	0.0128729	FGFR2/GJA1/MYO1E/STK3/ZFP36L1/BMPR1A/GLI2/ZMIZ1/TET1/ANGPT1/SOCS3/FUT8/ADAM10/RBPJ/HIF1A/CHST11/GNA12/TGFB3/FGFR1/PKD2/CAPN2/AR/PTCH1	23
BP	GO:0002768	immune response-regulating cell surface receptor signaling pathway	23/442	168/5658	0.00544625	0.021595	0.0128729	HSP90AA1/FOS/NR4A3/PLSCR1/CD38/DOCK1/ACTG1/GAB2/FYN/VAV3/JUN/PTPRJ/PRNP/LGALS3/MYO10/WASF2/ACTB/RPS6KA5/ABI1/MEF2C/VAV2/APPL2/TAB2	23
BP	GO:0050770	regulation of axonogenesis	13/442	76/5658	0.00545055	0.021595	0.0128729	APOE/MT3/SEMA5A/LRP1/TUBB2B/DAB1/NRP1/FN1/SEMA3E/DNM2/DSCAM/TIAM1/TRAK1	13
CC	GO:0015629	actin cytoskeleton	29/441	235/5894	0.00478782	0.0218728	0.0141115	DLC1/CFL1/MYO1E/AKAP13/ACTG1/FYN/CTNNA1/CASK/GSN/MYO10/WASF2/OPHN1/ACTB/MYO18A/ADCY8/HIP1R/SORBS1/DDR2/ARHGAP21/HIP1/SH3PXD2B/SIPA1L3/UTRN/KAT2B/IQGAP1/MYO9B/PKD2/CAPN2/MYO16	29
BP	GO:0017144	drug metabolic process	30/442	238/5658	0.00562763	0.0220814	0.0131628	HSPA1A/HSP90AA1/MT3/HSPA1B/TMSB4X/CLU/ALDH1A1/NR4A2/ENO1/AGT/FYN/ABCD4/TPR/DNM2/TGFB2/STAT3/EGR1/NCAN/RGN/BCAN/PPARGC1A/HIF1A/ATP2B4/DDIT4/NUP160/VCAN/PKD2/CTSH/HSPA8/PRDX1	30
BP	GO:0006091	generation of precursor metabolites and energy	17/442	112/5658	0.00573533	0.0224606	0.0133888	MT3/NR4A3/ALDH1A1/ENO1/PRDM16/PPP1R3C/TPR/STAT3/SORBS1/IL6ST/PPARGC1A/GBE1/HIF1A/DDIT4/NR1D1/NUP160/ASPH	17
BP	GO:0033673	negative regulation of kinase activity	17/442	112/5658	0.00573533	0.0224606	0.0133888	APOE/HSPB1/APC/GADD45B/TAOK3/DUSP1/PTPRJ/UBASH3B/SORL1/TSC2/RGN/SOCS3/PTPRT/CAMK2N1/WWTR1/PPP2R5A/KAT2B	17
MF	GO:0005543	phospholipid binding	23/438	163/5628	0.00355236	0.022512	0.0159574	APOE/PEBP1/MYO1E/ITPR2/AGAP1/GAB2/ZFYVE16/F3/PREX1/PIK3C2A/PSAP/MYO10/SYT1/OPHN1/PARD3/HIP1R/ABCA1/MFGE8/HIP1/APPL2/SH3PXD2B/IQGAP1/TULP3	23
BP	GO:0106106	cold-induced thermogenesis	12/442	68/5658	0.00577451	0.0225706	0.0134544	GJA1/APC/ALDH1A1/PRDM16/ZNF423/RBPJ/PPARGC1A/ID1/NR1D1/APPL2/PDGFC/NR1H2	12
BP	GO:0120161	regulation of cold-induced thermogenesis	12/442	68/5658	0.00577451	0.0225706	0.0134544	GJA1/APC/ALDH1A1/PRDM16/ZNF423/RBPJ/PPARGC1A/ID1/NR1D1/APPL2/PDGFC/NR1H2	12
BP	GO:0035150	regulation of tube size	11/442	60/5658	0.00601669	0.0229995	0.0137101	APOE/GJA1/DOCK4/CD38/AGT/PRKG1/PIK3C2A/PTPRM/ADORA2B/DOCK5/ADORA1	11
BP	GO:0035296	regulation of tube diameter	11/442	60/5658	0.00601669	0.0229995	0.0137101	APOE/GJA1/DOCK4/CD38/AGT/PRKG1/PIK3C2A/PTPRM/ADORA2B/DOCK5/ADORA1	11
BP	GO:0050880	regulation of blood vessel size	11/442	60/5658	0.00601669	0.0229995	0.0137101	APOE/GJA1/DOCK4/CD38/AGT/PRKG1/PIK3C2A/PTPRM/ADORA2B/DOCK5/ADORA1	11
BP	GO:0097746	regulation of blood vessel diameter	11/442	60/5658	0.00601669	0.0229995	0.0137101	APOE/GJA1/DOCK4/CD38/AGT/PRKG1/PIK3C2A/PTPRM/ADORA2B/DOCK5/ADORA1	11
BP	GO:1904892	regulation of STAT cascade	11/442	60/5658	0.00601669	0.0229995	0.0137101	AGT/HES5/FYN/DAB1/FGFR3/STAT3/SOCS3/PTPRT/IL6ST/IL6R/GHR	11
BP	GO:0008361	regulation of cell size	13/442	77/5658	0.00610582	0.0232616	0.0138663	APOE/MT3/SEMA5A/LRP1/VAV3/NRP1/FN1/SEMA3E/DNM2/MSN/DSCAM/AQP1/VAV2	13
BP	GO:0009161	ribonucleoside monophosphate metabolic process	13/442	77/5658	0.00610582	0.0232616	0.0138663	HSPA1A/HSPA1B/TMSB4X/ENO1/CASK/TPR/STAT3/PPARGC1A/HIF1A/DDIT4/DLG1/NUP160/HSPA8	13
BP	GO:0051348	negative regulation of transferase activity	18/442	122/5658	0.00614424	0.0233861	0.0139405	APOE/HSPB1/APC/GADD45B/ZFP36/TAOK3/DUSP1/PTPRJ/UBASH3B/SORL1/TSC2/RGN/SOCS3/PTPRT/CAMK2N1/WWTR1/PPP2R5A/KAT2B	18
CC	GO:0044448	cell cortex part	12/441	70/5894	0.00522089	0.0236028	0.0152276	DLC1/CFL1/ENO1/AKAP13/GSN/ACTB/HIP1R/HIP1/UTRN/ASPH/PKD2/CAPN2	12
BP	GO:0016579	protein deubiquitination	14/442	86/5658	0.00629654	0.0239434	0.0142727	APC/SMURF2/ITCH/IL33/UBB/RPS27A/ACTB/TADA3/HIF1A/UBC/STAMBP/KAT2B/BIRC2/AR	14
BP	GO:0006259	DNA metabolic process	36/442	302/5658	0.00635512	0.0241435	0.014392	HSP90AA1/GJA1/FOS/TFRC/PDGFRB/TCF7L2/HMBOX1/HNRNPA2B1/TAOK3/PPIA/FGF2/GLI2/DUSP1/PML/JUN/FUS/UBB/TET1/RPS27A/MYO18A/NCOA6/RGN/PPARGC1A/UBC/ATM/DACH1/DICER1/HNRNPD/NFIB/POLR2L/BCL6/POLR2J/FGFR1/NEK7/HGF/BAZ2A	36
BP	GO:1904951	positive regulation of establishment of protein localization	24/442	180/5658	0.00639057	0.0242555	0.0144588	GJA1/GLUL/CADM1/TCF7L2/CD38/LRP1/PPIA/FYN/TPR/PRNP/TGFB2/IL33/MBP/SORL1/MYO18A/ADCY8/WLS/HIF1A/C5/VPS28/YWHAE/TGFB3/SRI/HLA-E	24
MF	GO:0046982	protein heterodimerization activity	24/438	174/5628	0.00395248	0.0244784	0.0173512	FOS/NR4A2/RALGAPA2/NR4A1/TUBB2B/CTNNA1/SOX9/JUN/TGFB2/SYT1/ADCY8/HIP1R/YAP1/MEF2C/HIF1A/HIP1/TPD52L1/YWHAE/TGFB3/SRI/CAPN2/HGF/ADORA1/CFLAR	24
BP	GO:0070838	divalent metal ion transport	26/442	200/5658	0.00647653	0.0245371	0.0146266	MT3/GJA1/CAMK2G/PDGFRB/AGT/IL1RAPL1/ITPR2/CCL2/FYN/FGF2/SLC3A2/S100A1/PML/CASK/PRNP/LGALS3/RAMP1/UBASH3B/RGN/PLCE1/ITGAV/ATP2B4/GNAO1/YWHAE/PKD2/SRI	26
BP	GO:0009991	response to extracellular stimulus	27/442	210/5658	0.00647682	0.0245371	0.0146266	APOE/MT3/FOS/GLUL/CCK/PTN/NR4A2/TNC/GABARAPL2/ZFP36/MAP3K5/FYN/JUN/FAS/GSN/SST/SORL1/FOXO1/PPARGC1A/ITGA6/ABCA1/ADORA2B/STAT1/HSPA5/APPL2/NAMPT/HSPA8	27
BP	GO:0061013	regulation of mRNA catabolic process	12/442	69/5658	0.00651096	0.0246434	0.01469	HSPA1A/HSPB1/PRKCA/ZFP36L1/ZFP36/TOB1/HNRNPM/UBB/RPS27A/UBC/HNRNPD/HSPA8	12
BP	GO:0006898	receptor-mediated endocytosis	18/442	123/5658	0.00669387	0.0251861	0.0150135	APOE/HSP90AA1/CLU/TFRC/LRP1/TF/TNK2/B2M/CD63/CD9/DNM2/RAMP1/OPHN1/ANGPT1/SORL1/HIP1R/HIP1/DNM3	18
BP	GO:1903047	mitotic cell cycle process	36/442	303/5658	0.00669771	0.0251861	0.0150135	HSPA1A/HSP90AA1/HSPA1B/ID2/STMN1/PRKCA/APC/PDGFRB/CFL1/ARHGEF10/ZFP36L1/TAOK3/CCL2/CCND3/DUSP1/PHIP/TUBA1A/PML/TPR/DNM2/CCNY/CRADD/TACC1/CDC73/ID4/RPS6/ATM/DLG1/STAMBP/TPD52L1/BCL6/YWHAE/FGFR1/PKD2/PRMT2/MYO16	36
BP	GO:0003018	vascular process in circulatory system	13/442	78/5658	0.00682238	0.0256312	0.0152789	APOE/GJA1/DOCK4/CD38/AGT/PRKG1/PIK3C2A/PTPRJ/ANGPT1/PTPRM/ADORA2B/DOCK5/ADORA1	13
BP	GO:0001889	liver development	11/442	61/5658	0.00684006	0.0256739	0.0153043	PTN/SOX9/JUN/RGN/JARID2/HNRNPD/PKD2/HGF/TGFBR3/PTCH1/CFLAR	11
BP	GO:0003015	heart process	17/442	114/5658	0.00686496	0.0257199	0.0153317	GJA1/AGT/ITPR2/AKAP13/FYN/S100A1/TGFB2/FGF12/YAP1/WWTR1/ATP2B4/DLG1/GNAO1/YWHAE/ASPH/SRI/ADORA1	17
BP	GO:0051924	regulation of calcium ion transport	17/442	114/5658	0.00686496	0.0257199	0.0153317	GJA1/CAMK2G/PDGFRB/AGT/CCL2/FYN/S100A1/PML/CASK/PRNP/LGALS3/UBASH3B/RGN/GNAO1/YWHAE/PKD2/SRI	17
BP	GO:0022407	regulation of cell-cell adhesion	26/442	201/5658	0.00691183	0.0258478	0.015408	PRKCA/TFRC/NR4A3/MINK1/CCL2/FYN/GLI2/ZMIZ1/PRKG1/SERPINE2/CD9/PRNP/LGALS3/MYO10/DTX1/MBP/UBASH3B/IL6ST/ITGA6/SDC4/DLG1/IL6R/BCL6/AP3B1/ADAMTS18/HLA-E	26
BP	GO:0034762	regulation of transmembrane transport	26/442	201/5658	0.00691183	0.0258478	0.015408	GJA1/TMSB4X/NR4A3/NLGN1/AGT/MINK1/CCL2/FYN/S100A1/CD63/DNM2/PRNP/UBASH3B/ACTB/FGF12/RGN/SORBS1/PPARGC1A/MEF2C/ATP2B4/DLG1/APPL2/YWHAE/UTRN/PKD2/SRI	26
BP	GO:0006469	negative regulation of protein kinase activity	16/442	105/5658	0.00698286	0.0260744	0.015543	APOE/HSPB1/APC/GADD45B/TAOK3/DUSP1/PTPRJ/UBASH3B/SORL1/TSC2/RGN/SOCS3/PTPRT/CAMK2N1/WWTR1/KAT2B	16
BP	GO:0016458	gene silencing	14/442	87/5658	0.00698525	0.0260744	0.015543	ZFP36/HNRNPA2B1/NEAT1/NCOR2/TPR/DDX5/TET1/STAT3/DICER1/POLR2L/NUP160/POLR2J/BAZ2A/ARID1A	14
BP	GO:1903409	reactive oxygen species biosynthetic process	10/442	53/5658	0.00703614	0.0260837	0.0155486	HSP90AA1/CLU/AGT/FYN/DNM2/STAT3/RGN/ATP2B4/PKD2/CFLAR	10
MF	GO:0030674	protein binding, bridging	12/438	66/5628	0.00436367	0.0264244	0.0187306	GAB2/CUX1/TOB1/VAV3/GAB1/CRADD/HIP1R/SORBS1/HIP1/CHN2/FRS2/HSPA8	12
BP	GO:0006954	inflammatory response	43/442	379/5658	0.0072681	0.0267374	0.0159382	APOE/GJA1/TMSB4X/FOS/APOD/CLU/PLSCR1/PTN/AGT/BMPR1B/LRP1/CHI3L1/NEAT1/CCL2/F3/FN1/JUN/ITCH/IL33/STAT3/ADCY8/WFDC1/RPS6KA5/SOCS3/RBPJ/IL6ST/GPRC5B/HIF1A/ATM/ADORA2B/NR1D1/APPL2/NAMPT/C5/IL6R/BCL6/RICTOR/ACER3/BIRC2/HGF/ADORA1/DDT/HLA-E	43
BP	GO:0001505	regulation of neurotransmitter levels	18/442	124/5658	0.00728279	0.0267672	0.015956	HSP90AA1/CLU/GLUL/NLGN1/AGT/SLC7A11/CASK/DNM2/SYT1/RAP1B/RGN/NRXN1/MEF2C/SLC1A3/ATP2B4/ADORA2B/PKD2/HSPA8	18
BP	GO:0072511	divalent inorganic cation transport	26/442	202/5658	0.00737107	0.0270672	0.0161348	MT3/GJA1/CAMK2G/PDGFRB/AGT/IL1RAPL1/ITPR2/CCL2/FYN/FGF2/SLC3A2/S100A1/PML/CASK/PRNP/LGALS3/RAMP1/UBASH3B/RGN/PLCE1/ITGAV/ATP2B4/GNAO1/YWHAE/PKD2/SRI	26
BP	GO:0009123	nucleoside monophosphate metabolic process	13/442	79/5658	0.00760413	0.027757	0.016546	HSPA1A/HSPA1B/TMSB4X/ENO1/CASK/TPR/STAT3/PPARGC1A/HIF1A/DDIT4/DLG1/NUP160/HSPA8	13
BP	GO:0045216	cell-cell junction organization	13/442	79/5658	0.00760413	0.027757	0.016546	GJA1/PRKCA/APC/AGT/LIMS1/NLGN4X/CTNNA1/CDH13/CD9/TGFB2/PARD3/DLG1/TGFB3	13
BP	GO:0050866	negative regulation of cell activation	16/442	106/5658	0.00765205	0.027757	0.016546	APOE/ID2/PRKG1/SERPINE2/CD9/PRNP/LGALS3/DTX1/UBASH3B/MERTK/SDC4/ATM/DLG1/NR1D1/BCL6/ADAMTS18	16
BP	GO:0070661	leukocyte proliferation	22/442	163/5658	0.0076713	0.027757	0.016546	GJA1/CLU/TFRC/CD38/FYN/CCND3/VAV3/MSN/PRNP/BST2/LGALS3/IL33/IL6ST/SH3RF1/MEF2C/RPS6/SDC4/ATM/DLG1/IL6R/BCL6/HLA-E	22
BP	GO:0003205	cardiac chamber development	15/442	97/5658	0.00773935	0.027757	0.016546	ID2/FGFR2/BMPR1A/CPE/LTBP1/NRP1/DNM2/TGFB2/RBPJ/NRG1/MEF2C/HIF1A/FRS2/TGFBR3/ARID1A	15
BP	GO:0043487	regulation of RNA stability	11/442	62/5658	0.00774904	0.027757	0.016546	HSPA1A/HSPB1/PRKCA/ZFP36L1/ZFP36/HNRNPM/UBB/RPS27A/UBC/HNRNPD/HSPA8	11
BP	GO:0046034	ATP metabolic process	11/442	62/5658	0.00774904	0.027757	0.016546	HSPA1A/HSPA1B/TMSB4X/ENO1/TPR/STAT3/PPARGC1A/HIF1A/DDIT4/NUP160/HSPA8	11
BP	GO:0048593	camera-type eye morphogenesis	11/442	62/5658	0.00774904	0.027757	0.016546	PTN/PHACTR4/SOX9/ZEB1/DSCAM/EPHB1/HIF1A/HIPK2/PTPRM/FRS2/ARID1A	11
BP	GO:0050821	protein stabilization	11/442	62/5658	0.00774904	0.027757	0.016546	HSPA1A/HSP90AA1/MT3/HSPA1B/CLU/STK3/HIP1R/PPARGC1A/TBL1X/HIP1/MORC3	11
BP	GO:0046649	lymphocyte activation	38/442	327/5658	0.00776667	0.027757	0.016546	ID2/GJA1/TFRC/CD38/ZFP36L1/CCL2/FYN/GLI2/PREX1/CCND3/ZMIZ1/VAV3/B2M/PTPRJ/ZEB1/GSN/MSN/PRNP/BST2/LGALS3/DTX1/STAT3/EGR1/RBPJ/IL6ST/EPHB1/SH3RF1/MEF2C/MERTK/RPS6/SDC4/ATM/DLG1/IL6R/BCL6/AP3B1/PRDX1/HLA-E	38
BP	GO:0031331	positive regulation of cellular catabolic process	20/442	144/5658	0.00788851	0.0280304	0.016709	HSPA1A/APOE/HSP90AA1/HSPA1B/CLU/ZFP36L1/LRP1/ZFP36/TOB1/ITCH/MSN/IL33/CSNK1A1/TSC2/RGN/FOXO1/HIF1A/ATM/HNRNPD/EPM2A	20
BP	GO:0098655	cation transmembrane transport	33/442	275/5658	0.00799516	0.0281501	0.0167804	TMSB4X/NLGN1/AGT/IL1RAPL1/ITPR2/MINK1/TF/CCL2/SLC9A9/FYN/FGF2/SLC3A2/S100A1/CD63/DNM2/PRNP/SLC20A2/UBASH3B/FGF12/RGN/PLCE1/AQP1/PPARGC1A/MEF2C/ITGAV/SLC1A3/ATP6V0E1/ATP2B4/DLG1/YWHAE/UTRN/PKD2/SRI	33
BP	GO:0001657	ureteric bud development	10/442	54/5658	0.00805123	0.028214	0.0168185	FGFR2/AGT/FGF2/SOX9/FGF1/SDC4/DLG1/FGFR1/PKD2/PTCH1	10
BP	GO:0003151	outflow tract morphogenesis	10/442	54/5658	0.00805123	0.028214	0.0168185	FGFR2/BMPR1A/NRP1/JUN/TGFB2/RBPJ/ELN/MEF2C/HIF1A/TGFBR3	10
BP	GO:0014068	positive regulation of phosphatidylinositol 3-kinase signaling	10/442	54/5658	0.00805123	0.028214	0.0168185	PDGFRB/AGT/FYN/SOX9/GAB1/TGFB2/ANGPT1/FGFR1/PDGFC/HGF	10
BP	GO:0072163	mesonephric epithelium development	10/442	54/5658	0.00805123	0.028214	0.0168185	FGFR2/AGT/FGF2/SOX9/FGF1/SDC4/DLG1/FGFR1/PKD2/PTCH1	10
BP	GO:0072164	mesonephric tubule development	10/442	54/5658	0.00805123	0.028214	0.0168185	FGFR2/AGT/FGF2/SOX9/FGF1/SDC4/DLG1/FGFR1/PKD2/PTCH1	10
BP	GO:0019935	cyclic-nucleotide-mediated signaling	12/442	71/5658	0.00820533	0.0286306	0.0170668	APOE/PRKCA/AKAP13/PRKG1/SOX9/RAMP1/ADCY8/AQP1/ABCA1/KSR1/ATP2B4/ADORA2B	12
BP	GO:0051147	regulation of muscle cell differentiation	12/442	71/5658	0.00820533	0.0286306	0.0170668	FGFR2/AKAP13/CTNNA1/ZEB1/SPAG9/RBPJ/NRG1/MEF2C/MEGF10/FRS2/CAPN2/CFLAR	12
MF	GO:0042623	ATPase activity, coupled	12/438	67/5628	0.00495221	0.0293365	0.0207947	HSPA1A/HSP90AA1/HSPA1B/MYO1E/ABCD4/MYO10/ABCA1/ABCC4/ATP6V0E1/ATP2B4/HSPA5/HSPA8	12
BP	GO:1903320	regulation of protein modification by small protein conjugation or removal	13/442	80/5658	0.00845501	0.0294765	0.017571	HSPA1A/HSP90AA1/HSPA1B/FYN/ITCH/UBB/EGR1/ANGPT1/SASH1/HSPA5/VPS28/DCUN1D1/BIRC2	13
MF	GO:0004857	enzyme inhibitor activity	21/438	149/5628	0.0053032	0.0301067	0.0213407	HSPB1/MT3/PEBP1/PTN/AGT/TAOK3/TNK2/SERPINE2/BST2/LGALS3/WFDC1/SOCS3/CAMK2N1/ATP2B4/C5/TXNIP/KAT2B/IQGAP1/BIRC2/CAST/COL4A3	21
BP	GO:0061008	hepaticobiliary system development	11/442	63/5658	0.00874936	0.0303275	0.0180783	PTN/SOX9/JUN/RGN/JARID2/HNRNPD/PKD2/HGF/TGFBR3/PTCH1/CFLAR	11
BP	GO:0002697	regulation of immune effector process	25/442	195/5658	0.00894238	0.0308319	0.018379	CLU/TFRC/NR4A3/CADM1/GAB2/B2M/ITCH/PTPRJ/BST2/LGALS3/TGFB2/IL33/ANGPT1/MYO18A/SEC14L1/GPRC5B/ADORA2B/STAT1/APPL2/C5/BCL6/HTRA1/TGFB3/BIRC2/HLA-E	25
CC	GO:0005667	transcription factor complex	20/441	149/5894	0.007244	0.0311277	0.0200824	FOS/NR4A3/TCF7L2/NR4A2/NR4A1/JUND/SOX9/JUN/ZEB1/STAT3/NCOA6/RBPJ/YAP1/TADA3/HIF1A/HIPK2/WWTR1/DACH1/NR1D1/NR1H2	20
BP	GO:0007005	mitochondrion organization	16/442	108/5658	0.00914454	0.0315022	0.0187785	HSPA1A/HSP90AA1/CLU/CCK/GABARAPL2/JUN/STAT3/TSC2/HIP1R/PPARGC1A/HIF1A/YWHAE/STAT2/IFI6/TRAK1/HGF	16
BP	GO:0001823	mesonephros development	10/442	55/5658	0.00917544	0.0315285	0.0187942	FGFR2/AGT/FGF2/SOX9/FGF1/SDC4/DLG1/FGFR1/PKD2/PTCH1	10
BP	GO:0010565	regulation of cellular ketone metabolic process	10/442	55/5658	0.00917544	0.0315285	0.0187942	NR4A3/SLC7A11/NCOR2/EGR1/RGN/PPARGC1A/ATP2B4/NR1D1/APPL2/NR1H2	10
BP	GO:1903364	positive regulation of cellular protein catabolic process	10/442	55/5658	0.00917544	0.0315285	0.0187942	HSPA1A/APOE/HSP90AA1/HSPA1B/CLU/LRP1/MSN/IL33/CSNK1A1/RGN	10
BP	GO:0010498	proteasomal protein catabolic process	21/442	156/5658	0.0093474	0.0320381	0.019098	HSPA1A/APOE/HSPA1B/CLU/GABARAPL2/SMURF2/PML/ITCH/IL33/UBB/SMARCC1/RPS27A/OPHN1/CSNK1A1/UBC/WWTR1/TBL1X/HSPA5/NR1D1/GNA12/BIRC2	21
BP	GO:0070555	response to interleukin-1	14/442	90/5658	0.00941769	0.0321435	0.0191608	PRKCA/CD38/CHI3L1/CCL2/SOX9/UBB/RPS27A/EGR1/RPS6KA5/HIF1A/UBC/NR1D1/ST18/TAB2	14
BP	GO:0034765	regulation of ion transmembrane transport	22/442	166/5658	0.00946606	0.0322815	0.0192431	GJA1/TMSB4X/NLGN1/AGT/MINK1/CCL2/FYN/S100A1/CD63/DNM2/PRNP/UBASH3B/FGF12/RGN/PPARGC1A/MEF2C/ATP2B4/DLG1/YWHAE/UTRN/PKD2/SRI	22
BP	GO:0002576	platelet degranulation	11/442	64/5658	0.00984682	0.0335518	0.0200003	TMSB4X/CLU/TF/FN1/CD63/PSAP/CD9/TGFB2/ABCC4/TGFB3/HGF	11
BP	GO:0003002	regionalization	20/442	147/5658	0.0098662	0.0335897	0.0200229	FGFR2/BMPR1B/HES5/BMPR1A/GLI2/NRP1/FGF1/INTU/RBPJ/ABI1/LHX2/WLS/MEF2C/HIPK2/ATM/FGFR1/TULP3/FRS2/AR/PTCH1	20
BP	GO:0031668	cellular response to extracellular stimulus	16/442	109/5658	0.0099731	0.0339252	0.0202229	FOS/GLUL/PTN/NR4A2/TNC/GABARAPL2/MAP3K5/FYN/JUN/FAS/FOXO1/ITGA6/ADORA2B/HSPA5/NAMPT/HSPA8	16
BP	GO:0006109	regulation of carbohydrate metabolic process	12/442	73/5658	0.0102266	0.0347174	0.0206952	TPR/STAT3/RGN/FOXO1/SORBS1/PPARGC1A/HIF1A/DDIT4/NR1D1/NUP160/KAT2B/NCOA2	12
BP	GO:0045598	regulation of fat cell differentiation	12/442	73/5658	0.0102266	0.0347174	0.0206952	ID2/STK3/ZFP36L1/ZFP36/PRDM16/WIF1/FOXO1/ID4/WWTR1/ZBTB7C/NR1D1/SH3PXD2B	12
BP	GO:0070646	protein modification by small protein removal	14/442	91/5658	0.0103621	0.0347507	0.020715	APC/SMURF2/ITCH/IL33/UBB/RPS27A/ACTB/TADA3/HIF1A/UBC/STAMBP/KAT2B/BIRC2/AR	14
BP	GO:0031349	positive regulation of defense response	27/442	218/5658	0.0105553	0.0353146	0.0210512	HSPA1A/HSPA1B/GJA1/CADM1/CCK/PLSCR1/AGT/NEAT1/FYN/S100A1/ITCH/IL33/UBB/RPS27A/RPS6KA5/SEC14L1/IL6ST/GPRC5B/MEF2C/UBC/ADORA2B/NR1D1/APPL2/TAB2/BIRC2/DDT/HLA-E	27
CC	GO:0030667	secretory granule membrane	18/441	131/5894	0.00833576	0.0354678	0.0228825	CD38/ITPR2/CPE/TMBIM1/CD63/PSAP/CD9/PTPRJ/BST2/LGALS3/SYT1/RAP1B/ADAM10/ABCC4/ITGAV/STK10/IQGAP1/SRI	18
BP	GO:0019932	second-messenger-mediated signaling	22/442	168/5658	0.0108414	0.0356919	0.021276	APOE/PRKCA/AGT/ITPR2/AKAP13/PRKG1/CDH13/SOX9/PTPRJ/PRNP/RAMP1/ADCY8/RGN/PLCE1/AQP1/ABCA1/NRG1/KSR1/ATP2B4/ADORA2B/PKD2/SRI	22
BP	GO:0002274	myeloid leukocyte activation	35/442	302/5658	0.0108634	0.0356919	0.021276	HSPA1A/HSP90AA1/HSPA1B/CLU/NR4A3/PLSCR1/GAB2/CHI3L1/TMBIM1/PPIA/PREX1/B2M/JUN/CD63/PSAP/PTPRJ/GSN/BST2/LGALS3/IL33/NDRG1/RAP1B/GDI2/MYO18A/ADAM10/RBPJ/ITGAV/ATM/ADORA2B/NR1D1/NAMPT/STK10/IQGAP1/CTSH/HSPA8	35
BP	GO:0002685	regulation of leukocyte migration	15/442	101/5658	0.0111663	0.0363129	0.0216462	APOD/PTN/CCL2/CXCL14/DUSP1/CD9/MSN/LGALS3/IL33/ADAM10/C5/IL6R/STK10/ADORA1/DDT	15
BP	GO:1905330	regulation of morphogenesis of an epithelium	12/442	74/5658	0.011372	0.0369461	0.0220237	GPC6/AGT/SMURF2/SULF1/SOX9/FGF1/ZNRF3/STAT1/TIAM1/FGFR1/HGF/AR	12
BP	GO:0031348	negative regulation of defense response	14/442	92/5658	0.0113792	0.0369461	0.0220237	APOE/APOD/CCK/ITCH/WFDC1/SOCS3/SEC14L1/NR1D1/APPL2/HTRA1/HGF/ADORA1/NR1H2/HLA-E	14
BP	GO:0035303	regulation of dephosphorylation	13/442	83/5658	0.0114631	0.0371887	0.0221683	PDGFRB/DLC1/PTN/PHACTR4/LGALS3/TGFB2/PPP2R1B/RGN/MEF2C/YWHAE/PPP2R5A/IQGAP1/ADORA1	13
CC	GO:0009898	cytoplasmic side of plasma membrane	11/441	66/5894	0.00910252	0.0372688	0.0240444	GNA14/FYN/GNG7/S100A6/DLG1/HIP1/GNAO1/GNA12/TIAM1/IQGAP1/BIRC2	11
CC	GO:0090575	RNA polymerase II transcription factor complex	11/441	66/5894	0.00910252	0.0372688	0.0240444	FOS/TCF7L2/JUND/JUN/STAT3/YAP1/TADA3/HIF1A/HIPK2/NR1D1/NR1H2	11
CC	GO:0098793	presynapse	22/441	173/5894	0.00938878	0.0375555	0.0242293	MT3/GLUL/CCK/PTN/NLGN1/ACTG1/TNIK/NLGN4X/CASK/DNM2/SYT1/OPHN1/ACTB/ADCY8/ADAM10/NRXN1/ATP2B4/HIP1/DNM3/SRI/ADORA1/HSPA8	22
BP	GO:0010817	regulation of hormone levels	23/442	179/5658	0.0115925	0.0375784	0.0224006	GJA1/PRKCA/GLUL/CAMK2G/MAP4K4/ALDH1A1/TCF7L2/CD38/AGT/ITPR2/LRP1/CPE/EGR1/ADCY8/PPARGC1A/HIF1A/NR1D1/HMGN3/TIAM1/FGFR1/SRI/ADORA1/GHR	23
BP	GO:0046425	regulation of JAK-STAT cascade	10/442	57/5658	0.0117801	0.0381561	0.022745	AGT/HES5/FYN/DAB1/FGFR3/STAT3/SOCS3/IL6ST/IL6R/GHR	10
CC	GO:0098562	cytoplasmic side of membrane	12/441	76/5894	0.0101338	0.0389209	0.0251103	GNA14/FYN/GNG7/S100A6/DLG1/HIP1/GNAO1/GNA12/TIAM1/IQGAP1/PKD2/BIRC2	12
BP	GO:0051091	positive regulation of DNA-binding transcription factor activity	17/442	121/5658	0.012306	0.0396449	0.0236324	HSPA1A/HSPA1B/CLU/STK3/AGT/UBB/RPS27A/STAT3/ADCY8/RPS6KA5/PPARGC1A/DDR2/HIPK2/UBC/TAB2/AR/CFLAR	17
BP	GO:0043903	regulation of symbiosis, encompassing mutualism through parasitism	14/442	93/5658	0.0124726	0.0400801	0.0238918	APOE/PLSCR1/CFL1/ZFP36/PPIA/PML/JUN/DDX5/GSN/BST2/ITGAV/STAT1/POLR2L/POLR2J	14
BP	GO:0051604	protein maturation	18/442	131/5658	0.0126771	0.040513	0.0241499	CLU/ENO1/CPE/F3/SERPINE2/GSN/PRNP/SORL1/ADAM10/C5/ASPH/KAT2B/SPON1/CTSH/BIRC2/CAPN2/CAST/PTCH1	18
BP	GO:0043583	ear development	16/442	112/5658	0.0128205	0.0409389	0.0244038	FGFR2/NR4A3/PDGFRB/HES5/CXCL14/GLI2/SOX9/PRRX1/PSAP/ZEB1/TGFB2/ADAM10/RBPJ/SDC4/TGFB3/FGFR1	16
BP	GO:0034220	ion transmembrane transport	43/442	392/5658	0.0128777	0.0410894	0.0244935	GJA1/TMSB4X/GABRB1/NLGN1/AGT/IL1RAPL1/SLC7A11/ITPR2/MINK1/TF/CCL2/SLC9A9/FYN/FGF2/GABRG1/SLC3A2/ABCD4/S100A1/CD63/DNM2/PRNP/SLC20A2/UBASH3B/FGF12/RGN/PLCE1/AQP1/PPARGC1A/ABCA1/ABCC4/MEF2C/ITGAV/SLC1A3/ATP6V0E1/S100A6/ATP2B4/DLG1/SLC4A4/YWHAE/UTRN/ASPH/PKD2/SRI	43
MF	GO:0005085	guanyl-nucleotide exchange factor activity	14/438	88/5628	0.00748372	0.0416187	0.0295008	DOCK4/PREX2/ARHGEF10/DOCK1/AKAP13/RIN2/PREX1/VAV3/PLCE1/VAV2/TIAM1/ARHGEF10L/DOCK5/RGL3	14
MF	GO:0017111	nucleoside-triphosphatase activity	32/438	265/5628	0.00773008	0.042129	0.0298625	HSPA1A/HSP90AA1/HSPA1B/GNA14/MYO1E/AGAP1/RGS20/TUBB2B/RGS6/ABCD4/TUBA1A/DDX5/DNM2/GNG7/MYO10/RNF213/RAP1B/RGS16/ABCA1/ABCC4/ATP6V0E1/ATP2B4/HSPA5/DICER1/GNAO1/GNA12/RERG/DNM3/MYO9B/TUBA1B/HSPA8/MYO16	32
MF	GO:0000978	RNA polymerase II proximal promoter sequence-specific DNA binding	31/438	255/5628	0.00789448	0.0421813	0.0298996	FOS/NR4A3/ETV6/TCF7L2/NR4A2/MEIS2/NR4A1/JUND/GLI2/WBP2/SOX9/PRRX1/JUN/ZEB1/SMARCC1/STAT3/ACTB/RBPJ/LHX2/YAP1/MEF2C/HIF1A/STAT1/DACH1/NR1D1/NFIB/ST18/STAT2/AR/NCOA2/NR1H2	31
BP	GO:0048771	tissue remodeling	14/442	94/5658	0.013646	0.0430674	0.0256726	GJA1/PRKCA/TFRC/PTN/CD38/AGT/TMBIM1/UBASH3B/RBPJ/MEF2C/HIF1A/MERTK/S1PR1/TGFB3	14
BP	GO:0070925	organelle assembly	32/442	275/5658	0.0137638	0.0433925	0.0258664	HSPA1A/HSP90AA1/HSPA1B/RPS15/PTPRD/PDGFRB/ARHGEF10/NLGN1/AKAP13/GABARAPL2/ACTG1/SQLE/TUBA1A/TPR/DNM2/GSN/MSN/RPL10/INTU/RPL23A/NRXN1/ABCC4/MEF2C/WWTR1/SDC4/SH3PXD2B/VPS28/YWHAE/RPL12/KAT2B/NEK7/CFLAR	32
BP	GO:0061136	regulation of proteasomal protein catabolic process	11/442	67/5658	0.013781	0.0433925	0.0258664	HSPA1A/APOE/HSPA1B/CLU/GABARAPL2/IL33/UBB/SMARCC1/OPHN1/CSNK1A1/GNA12	11
BP	GO:1901136	carbohydrate derivative catabolic process	11/442	67/5658	0.013781	0.0433925	0.0258664	GPC6/FGF2/GPC5/PSAP/PDE1A/HPSE2/NCAN/BCAN/SDC4/ADAMTS9/VCAN	11
MF	GO:0005126	cytokine receptor binding	18/438	126/5628	0.00826498	0.0437322	0.030999	SMURF2/TMBIM1/CCL2/CNTFR/CXCL14/ITCH/TGFB2/STAT3/IL6ST/STAT1/C5/IL6R/JAK1/TGFB3/FRS2/TGFBR3/DDT/CFLAR	18
BP	GO:0030203	glycosaminoglycan metabolic process	12/442	76/5658	0.0139568	0.0438781	0.0261559	GPC6/PDGFRB/FGF2/GPC5/HPSE2/ANGPT1/NCAN/BCAN/SDC4/CHST11/VCAN/HGF	12
BP	GO:1902115	regulation of organelle assembly	12/442	76/5658	0.0139568	0.0438781	0.0261559	HSPA1A/HSPA1B/PTPRD/AKAP13/TPR/DNM2/GSN/MSN/NRXN1/MEF2C/SDC4/KAT2B	12
BP	GO:0002253	activation of immune response	32/442	276/5658	0.0144627	0.0450849	0.0268753	HSPA1A/HSP90AA1/HSPA1B/CLU/NR4A3/PLSCR1/CD38/DOCK1/ACTG1/FYN/VAV3/S100A1/ITCH/PTPRJ/PRNP/LGALS3/MYO10/UBB/RPS27A/WASF2/ACTB/RPS6KA5/SEC14L1/ABI1/MEF2C/UBC/VAV2/NR1D1/APPL2/C5/TAB2/BIRC2	32
BP	GO:0010608	posttranscriptional regulation of gene expression	25/442	203/5658	0.0145272	0.0452167	0.0269538	HSPA1A/HSPB1/PRKCA/ZFP36L1/ZFP36/HNRNPA2B1/NEAT1/TOB1/NCOR2/TPR/DDX5/HNRNPM/UBB/RPS27A/STAT3/RPL10/UBC/DICER1/HNRNPD/POLR2L/NUP160/POLR2J/RPLP1/RPS9/HSPA8	25
BP	GO:0051051	negative regulation of transport	25/442	203/5658	0.0145272	0.0452167	0.0269538	HSPA1A/APOE/TMSB4X/APOD/MAP4K4/IL1RAPL1/SERPINE2/FN1/PML/TPR/BST2/LGALS3/IL33/RAP1B/ANGPT1/FGF12/NRG1/ITGAV/APPL2/GNAO1/YWHAE/PKD2/SRI/ADORA1/NR1H2	25
CC	GO:0016324	apical plasma membrane	18/441	136/5894	0.0121317	0.0453894	0.0292835	GJA1/PDGFRB/TF/CNTFR/TNIK/SLC3A2/FN1/CD9/MSN/BST2/ADCY8/PARD3/AQP1/HIP1R/DDR2/DLG1/IL6R/SIPA1L3	18
BP	GO:0002367	cytokine production involved in immune response	10/442	59/5658	0.014908	0.0459795	0.0274085	NR4A3/B2M/BST2/TGFB2/ANGPT1/GPRC5B/DLG1/BCL6/TGFB3/HLA-E	10
BP	GO:0035304	regulation of protein dephosphorylation	10/442	59/5658	0.014908	0.0459795	0.0274085	PDGFRB/DLC1/PTN/PHACTR4/LGALS3/PPP2R1B/RGN/YWHAE/PPP2R5A/ADORA1	10
BP	GO:2001257	regulation of cation channel activity	10/442	59/5658	0.014908	0.0459795	0.0274085	NLGN1/MINK1/CCL2/S100A1/FGF12/PPARGC1A/MEF2C/DLG1/PKD2/SRI	10
BP	GO:0016485	protein processing	16/442	114/5658	0.0150479	0.0463758	0.0276447	CLU/ENO1/CPE/F3/SERPINE2/GSN/PRNP/ADAM10/C5/ASPH/SPON1/CTSH/BIRC2/CAPN2/CAST/PTCH1	16
BP	GO:0006887	exocytosis	40/442	363/5658	0.0150897	0.0464693	0.0277005	HSPA1A/HSP90AA1/HSPA1B/TMSB4X/CLU/NR4A3/NLGN1/IL1RAPL1/TF/GAB2/CHI3L1/TMBIM1/PPIA/FN1/B2M/PIK3C2A/CD63/PSAP/CD9/CASK/PTPRJ/GSN/BST2/LGALS3/TGFB2/SYT1/RAP1B/GDI2/ADAM10/ABCC4/ITGAV/SDC4/ADORA2B/ARHGAP17/STK10/TGFB3/IQGAP1/CTSH/HGF/HSPA8	40
BP	GO:0002698	negative regulation of immune effector process	11/442	68/5658	0.0153261	0.0471261	0.028092	ITCH/BST2/LGALS3/TGFB2/IL33/ANGPT1/SEC14L1/BCL6/HTRA1/TGFB3/HLA-E	11
BP	GO:0006457	protein folding	11/442	68/5658	0.0153261	0.0471261	0.028092	HSPA1A/HSPB1/HSP90AA1/HSPA1B/CLU/DNAJB1/PPIA/B2M/HSPA5/GNAO1/HSPA8	11
MF	GO:0061134	peptidase regulator activity	14/438	90/5628	0.00911951	0.0473346	0.0335525	MT3/PEBP1/AGT/SERPINE2/FN1/BST2/WFDC1/C5/CTSH/BIRC2/CAST/FBLN1/COL4A3/CFLAR	14
BP	GO:0051100	negative regulation of binding	12/442	77/5658	0.0154062	0.0473366	0.0282175	ID2/TMSB4X/STMN1/B2M/JUN/ACTB/SORL1/LHX2/ID1/ID4/HSPA5/SRI	12
BP	GO:0045055	regulated exocytosis	37/442	331/5658	0.0154714	0.0475011	0.0283155	HSPA1A/HSP90AA1/HSPA1B/TMSB4X/CLU/NR4A3/NLGN1/TF/GAB2/CHI3L1/TMBIM1/PPIA/FN1/B2M/CD63/PSAP/CD9/CASK/PTPRJ/GSN/BST2/LGALS3/TGFB2/SYT1/RAP1B/GDI2/ADAM10/ABCC4/ITGAV/ADORA2B/ARHGAP17/STK10/TGFB3/IQGAP1/CTSH/HGF/HSPA8	37
CC	GO:0036464	cytoplasmic ribonucleoprotein granule	11/441	70/5894	0.0140137	0.049852	0.0321626	ZFP36L1/ZFP36/RBPMS/TUBA1A/RPL28/ACTB/RPS6/DCP1B/IQGAP1/CTSH/GHR	11
BP	GO:0009607	response to biotic stimulus	45/442	420/5658	0.0164142	0.049977	0.0297914	HSPB1/FGFR2/GJA1/STMN1/FOS/PRKCA/CLU/PLSCR1/CFL1/ENO1/ZFP36/CCL2/JUND/B2M/PML/JUN/ITCH/BST2/IL33/MAP3K14/SEC14L1/RBPJ/PPARGC1A/ABCA1/CDC73/MEF2C/SASH1/DDIT4/STAT1/IFIT3/HSPA5/NR1D1/NFIB/ADAMTS9/TXNIP/IL6R/HTRA1/STAT2/IFI6/TAB2/BIRC2/CAPN2/NR1H2/CFLAR/HLA-E	45
BP	GO:0120031	plasma membrane bounded cell projection assembly	24/442	195/5658	0.0165592	0.0500746	0.0298496	HSP90AA1/APC/NLGN1/PMP22/TNIK/CDH13/VAV3/NRP1/TUBA1A/DNM2/GSN/MYO10/KANK1/WASF2/INTU/OPHN1/ITGA6/ABCC4/WWTR1/VAV2/S1PR1/DNM3/YWHAE/TGFB3	24
BP	GO:0051346	negative regulation of hydrolase activity	23/442	185/5658	0.0167887	0.0505527	0.0301346	MT3/PEBP1/PTN/AGT/TNK2/SERPINE2/BST2/LGALS3/TGFB2/SORL1/WFDC1/RGN/AQP1/SH3RF1/C5/YWHAE/IQGAP1/IFI6/BIRC2/HGF/CAST/COL4A3/CFLAR	23
BP	GO:0007249	I-kappaB kinase/NF-kappaB signaling	18/442	135/5658	0.0169484	0.0509939	0.0303976	HSPB1/GJA1/AKAP13/FYN/BST2/UBB/RPS27A/ANGPT1/S100B/MAP3K14/WLS/GPRC5B/UBC/STAT1/NR1D1/TAB2/BIRC2/CFLAR	18
BP	GO:0051092	positive regulation of NF-kappaB transcription factor activity	12/442	78/5658	0.0169669	0.0509939	0.0303976	HSPA1A/HSPA1B/CLU/AGT/UBB/RPS27A/STAT3/RPS6KA5/UBC/TAB2/AR/CFLAR	12
BP	GO:0002700	regulation of production of molecular mediator of immune response	11/442	69/5658	0.016998	0.0509939	0.0303976	TFRC/NR4A3/B2M/BST2/TGFB2/IL33/ANGPT1/GPRC5B/BCL6/TGFB3/HLA-E	11
BP	GO:0009205	purine ribonucleoside triphosphate metabolic process	11/442	69/5658	0.016998	0.0509939	0.0303976	HSPA1A/HSPA1B/TMSB4X/ENO1/TPR/STAT3/PPARGC1A/HIF1A/DDIT4/NUP160/HSPA8	11
BP	GO:0031396	regulation of protein ubiquitination	11/442	69/5658	0.016998	0.0509939	0.0303976	HSPA1A/HSP90AA1/HSPA1B/FYN/UBB/ANGPT1/SASH1/HSPA5/VPS28/DCUN1D1/BIRC2	11
CC	GO:0044429	mitochondrial part	14/441	99/5894	0.014838	0.0517278	0.0333728	MT3/GJA1/PRKCA/CLU/SLC27A1/LGALS3/UBB/RPS27A/STAT3/UBC/TXNIP/IFI6/TRAK1/CAPN2	14
CC	GO:0031966	mitochondrial membrane	12/441	80/5894	0.0150177	0.0517278	0.0333728	MT3/GJA1/PRKCA/CLU/SLC27A1/LGALS3/UBB/RPS27A/STAT3/UBC/IFI6/TRAK1	12
BP	GO:0050801	ion homeostasis	35/442	312/5658	0.0173818	0.052107	0.0310611	APOE/MT3/GJA1/TFRC/CCK/CD38/AGT/SLC7A11/ITPR2/LRP1/TF/SLC9A9/FYN/FGF2/B2M/PML/PRNP/NEO1/UBASH3B/FGF12/ADCY8/RGN/PLCE1/ABCA1/HIF1A/ITGAV/ATP6V0E1/ATP2B4/SLC4A4/S1PR1/YWHAE/IFI6/PKD2/SRI/ADORA1	35
BP	GO:0043270	positive regulation of ion transport	16/442	116/5658	0.0175649	0.0526169	0.0313651	APOE/TMSB4X/PDGFRB/CCK/AGT/CCL2/S100A1/CASK/DNM2/LGALS3/FGF12/RGN/DLG1/PKD2/SRI/ADORA1	16
MF	GO:0017016	Ras GTPase binding	21/438	158/5628	0.0103232	0.0530768	0.0376228	DOCK4/PREX2/ARHGEF10/DOCK1/AKAP13/RIN2/TBC1D22A/PREX1/VAV3/SRGAP1/NDRG1/GDI2/PLCE1/VAV2/ARHGAP17/DIAPH2/TIAM1/IQGAP1/ARHGEF10L/MYO9B/RGL3	21
MF	GO:0000987	proximal promoter sequence-specific DNA binding	31/438	261/5628	0.0109373	0.0546863	0.0387636	FOS/NR4A3/ETV6/TCF7L2/NR4A2/MEIS2/NR4A1/JUND/GLI2/WBP2/SOX9/PRRX1/JUN/ZEB1/SMARCC1/STAT3/ACTB/RBPJ/LHX2/YAP1/MEF2C/HIF1A/STAT1/DACH1/NR1D1/NFIB/ST18/STAT2/AR/NCOA2/NR1H2	31
CC	GO:0099081	supramolecular polymer	35/441	324/5894	0.0162708	0.0551682	0.0355924	HSPB1/MT3/GJA1/STMN1/APC/ENO1/AKAP13/ACTG1/FYN/LTBP1/TUBB2B/NRP1/TUBA1A/S100A1/DNM2/NDRG1/CSNK1A1/ELN/ATP2B4/SDC4/DLG1/MAP7/DNM3/TIAM1/PPP2R5A/KAT2B/IQGAP1/MYO9B/PKD2/NEK7/TUBA1B/SRI/FBN2/FBLN1/COL4A3	35
CC	GO:0045177	apical part of cell	20/441	161/5894	0.0164333	0.0552873	0.0356692	GJA1/PDGFRB/LRP1/TF/CNTFR/TNIK/SLC3A2/DAB1/FN1/CD9/MSN/BST2/ADCY8/PARD3/AQP1/HIP1R/DDR2/DLG1/IL6R/SIPA1L3	20
BP	GO:0007416	synapse assembly	10/442	61/5658	0.0186169	0.0556032	0.0331452	PTPRD/NLGN1/IL1RAPL1/NLGN4X/DSCAM/EPHB1/NRXN1/NRG1/MEF2C/DNM3	10
BP	GO:0006022	aminoglycan metabolic process	12/442	79/5658	0.0186438	0.0556032	0.0331452	GPC6/PDGFRB/FGF2/GPC5/HPSE2/ANGPT1/NCAN/BCAN/SDC4/CHST11/VCAN/HGF	12
BP	GO:0043409	negative regulation of MAPK cascade	12/442	79/5658	0.0186438	0.0556032	0.0331452	APOE/PEBP1/TAOK3/DUSP1/ITCH/PTPRJ/SORL1/NDRG2/FOXO1/CAMK2N1/DLG1/FBLN1	12
MF	GO:0008289	lipid binding	33/438	283/5628	0.011467	0.0557993	0.0395526	APOE/APOD/PEBP1/DLC1/MYO1E/ITPR2/AGAP1/GAB2/ZFYVE16/F3/PREX1/PIK3C2A/PSAP/LAMA1/MYO10/RLBP1/SYT1/OPHN1/PARD3/HIP1R/ABCA1/MFGE8/HIP1/APPL2/SH3PXD2B/S1PR1/TIAM1/PGGT1B/IQGAP1/TULP3/AR/PTCH1/EPN2	33
MF	GO:0016817	hydrolase activity, acting on acid anhydrides	33/438	283/5628	0.011467	0.0557993	0.0395526	HSPA1A/HSP90AA1/HSPA1B/GNA14/MYO1E/AGAP1/RGS20/TUBB2B/RGS6/ABCD4/TUBA1A/DDX5/DNM2/GNG7/MYO10/RNF213/RAP1B/ENTPD1/RGS16/ABCA1/ABCC4/ATP6V0E1/ATP2B4/HSPA5/DICER1/GNAO1/GNA12/RERG/DNM3/MYO9B/TUBA1B/HSPA8/MYO16	33
MF	GO:0016818	hydrolase activity, acting on acid anhydrides, in phosphorus-containing anhydrides	33/438	283/5628	0.011467	0.0557993	0.0395526	HSPA1A/HSP90AA1/HSPA1B/GNA14/MYO1E/AGAP1/RGS20/TUBB2B/RGS6/ABCD4/TUBA1A/DDX5/DNM2/GNG7/MYO10/RNF213/RAP1B/ENTPD1/RGS16/ABCA1/ABCC4/ATP6V0E1/ATP2B4/HSPA5/DICER1/GNAO1/GNA12/RERG/DNM3/MYO9B/TUBA1B/HSPA8/MYO16	33
BP	GO:0055082	cellular chemical homeostasis	34/442	303/5658	0.018839	0.0558645	0.033301	APOE/MT3/GJA1/TFRC/MAP4K4/CD38/AGT/ITPR2/LRP1/TF/SLC9A9/FYN/FGF2/PML/PRNP/UBASH3B/ADCY8/RGN/PLCE1/FOXO1/PPARGC1A/HIF1A/ITGAV/ATP6V0E1/ATP2B4/NR1D1/HMGN3/SLC4A4/S1PR1/YWHAE/TIAM1/PKD2/SRI/ADORA1	34
BP	GO:1903311	regulation of mRNA metabolic process	16/442	117/5658	0.018939	0.0559622	0.0333592	HSPA1A/HSPB1/PRKCA/ZFP36L1/ZFP36/HNRNPA2B1/TOB1/DDX5/HNRNPM/UBB/RPS27A/SRSF6/CDC73/UBC/HNRNPD/HSPA8	16
CC	GO:0099080	supramolecular complex	35/441	325/5894	0.0169921	0.0562747	0.0363063	HSPB1/MT3/GJA1/STMN1/APC/ENO1/AKAP13/ACTG1/FYN/LTBP1/TUBB2B/NRP1/TUBA1A/S100A1/DNM2/NDRG1/CSNK1A1/ELN/ATP2B4/SDC4/DLG1/MAP7/DNM3/TIAM1/PPP2R5A/KAT2B/IQGAP1/MYO9B/PKD2/NEK7/TUBA1B/SRI/FBN2/FBLN1/COL4A3	35
MF	GO:0048018	receptor ligand activity	24/438	190/5628	0.0117544	0.0566915	0.040185	CCK/SEMA5A/PTN/AGT/CCL2/CXCL14/FGF2/SEMA3E/EFEMP1/LGALS3/TGFB2/IL33/FGF1/SST/FGF12/OSGIN2/NRG1/NAMPT/C5/IL6R/TGFB3/PDGFC/HGF/NRG3	24
BP	GO:0002429	immune response-activating cell surface receptor signaling pathway	20/442	157/5658	0.0194822	0.056834	0.0338789	HSP90AA1/NR4A3/PLSCR1/CD38/DOCK1/ACTG1/FYN/VAV3/PTPRJ/PRNP/LGALS3/MYO10/WASF2/ACTB/RPS6KA5/ABI1/MEF2C/VAV2/APPL2/TAB2	20
BP	GO:0006936	muscle contraction	20/442	157/5658	0.0194822	0.056834	0.0338789	GJA1/DOCK4/CD38/ENO1/AGT/SULF1/PRKG1/PIK3C2A/FGF12/PLCE1/SORBS1/ATP2B4/ADORA2B/DLG1/GNAO1/UTRN/ASPH/SRI/DOCK5/ADORA1	20
BP	GO:0050792	regulation of viral process	13/442	89/5658	0.0199048	0.0577538	0.0344272	APOE/PLSCR1/CFL1/ZFP36/PPIA/PML/JUN/DDX5/GSN/BST2/STAT1/POLR2L/POLR2J	13
BP	GO:0050727	regulation of inflammatory response	23/442	188/5658	0.0200002	0.0579891	0.0345674	APOE/TMSB4X/APOD/CLU/AGT/NEAT1/IL33/WFDC1/SOCS3/IL6ST/GPRC5B/ATM/ADORA2B/NR1D1/APPL2/C5/BCL6/RICTOR/BIRC2/HGF/ADORA1/DDT/HLA-E	23
BP	GO:0043207	response to external biotic stimulus	43/442	403/5658	0.0200531	0.0580596	0.0346095	HSPB1/FGFR2/GJA1/STMN1/FOS/PRKCA/CLU/PLSCR1/CFL1/ENO1/ZFP36/CCL2/JUND/B2M/PML/JUN/ITCH/BST2/IL33/MAP3K14/SEC14L1/RBPJ/PPARGC1A/ABCA1/CDC73/MEF2C/SASH1/DDIT4/STAT1/IFIT3/NR1D1/NFIB/ADAMTS9/IL6R/HTRA1/STAT2/IFI6/TAB2/BIRC2/CAPN2/NR1H2/CFLAR/HLA-E	43
BP	GO:0051707	response to other organism	43/442	403/5658	0.0200531	0.0580596	0.0346095	HSPB1/FGFR2/GJA1/STMN1/FOS/PRKCA/CLU/PLSCR1/CFL1/ENO1/ZFP36/CCL2/JUND/B2M/PML/JUN/ITCH/BST2/IL33/MAP3K14/SEC14L1/RBPJ/PPARGC1A/ABCA1/CDC73/MEF2C/SASH1/DDIT4/STAT1/IFIT3/NR1D1/NFIB/ADAMTS9/IL6R/HTRA1/STAT2/IFI6/TAB2/BIRC2/CAPN2/NR1H2/CFLAR/HLA-E	43
BP	GO:0001837	epithelial to mesenchymal transition	12/442	80/5658	0.0204419	0.05885	0.0350806	FGFR2/LDLRAD4/SOX9/DDX5/TGFB2/RBPJ/HIF1A/WWTR1/TIAM1/TGFB3/HGF/TGFBR3	12
BP	GO:0007369	gastrulation	12/442	80/5658	0.0204419	0.05885	0.0350806	FGFR2/NR4A3/BMPR1A/FN1/MBP/CDC73/WLS/ITGAV/RPS6/FGFR1/FRS2/ARID1A	12
BP	GO:0071347	cellular response to interleukin-1	12/442	80/5658	0.0204419	0.05885	0.0350806	CHI3L1/CCL2/SOX9/UBB/RPS27A/EGR1/RPS6KA5/HIF1A/UBC/NR1D1/ST18/TAB2	12
BP	GO:0051494	negative regulation of cytoskeleton organization	10/442	62/5658	0.0207068	0.0595706	0.0355102	TMSB4X/STMN1/APC/DLC1/GSN/KANK1/WASF2/HIP1R/S1PR1/KAT2B	10
MF	GO:0001012	RNA polymerase II regulatory region DNA binding	40/438	360/5628	0.0124836	0.0596806	0.0423037	FOS/NR4A3/ETV6/TCF7L2/NR4A2/ENO1/MEIS2/HES5/NR4A1/CUX1/JUND/GLI2/NCOR2/WBP2/SOX9/PRRX1/JUN/ZEB1/SMARCC1/STAT3/EGR1/ACTB/JARID2/RBPJ/LHX2/YAP1/MEF2C/HIF1A/STAT1/DACH1/NR1D1/NFIB/EAF2/BCL6/ST18/KAT2B/STAT2/AR/NCOA2/NR1H2	40
BP	GO:1903708	positive regulation of hemopoiesis	14/442	99/5658	0.0208394	0.0598714	0.0356895	HSPA1A/HSPA1B/ID2/FOS/PRKCA/ZFP36L1/GLI2/ZMIZ1/JUN/STAT3/HIF1A/STAT1/BCL6/AP3B1	14
BP	GO:0046651	lymphocyte proliferation	19/442	148/5658	0.0208409	0.0598714	0.0356895	GJA1/TFRC/CD38/FYN/CCND3/VAV3/MSN/PRNP/LGALS3/IL6ST/SH3RF1/MEF2C/RPS6/SDC4/ATM/DLG1/IL6R/BCL6/HLA-E	19
BP	GO:0051249	regulation of lymphocyte activation	25/442	210/5658	0.021439	0.0615463	0.0366879	ID2/TFRC/CD38/ZFP36L1/CCL2/FYN/GLI2/ZMIZ1/VAV3/ZEB1/GSN/PRNP/LGALS3/DTX1/IL6ST/SH3RF1/MEF2C/MERTK/SDC4/ATM/DLG1/IL6R/BCL6/AP3B1/HLA-E	25
CC	GO:0005913	cell-cell adherens junction	10/441	64/5894	0.019426	0.0619917	0.0399947	GJA1/APC/CTNNA1/CDH13/NDRG1/PARD3/SORBS1/ITGA6/PTPRM/FRS2	10
MF	GO:0005516	calmodulin binding	14/438	94/5628	0.0132286	0.0621515	0.0440553	CAMK2G/MYO1E/CASK/DDX5/FAS/PDE1A/MYO10/SYT1/MBP/ADCY8/RGS16/ATP2B4/IQGAP1/MYO9B	14
BP	GO:0030031	cell projection assembly	24/442	200/5658	0.0219342	0.0627462	0.0374032	HSP90AA1/APC/NLGN1/PMP22/TNIK/CDH13/VAV3/NRP1/TUBA1A/DNM2/GSN/MYO10/KANK1/WASF2/INTU/OPHN1/ITGA6/ABCC4/WWTR1/VAV2/S1PR1/DNM3/YWHAE/TGFB3	24
BP	GO:0009314	response to radiation	19/442	149/5658	0.0222217	0.0634347	0.0378136	ID2/FOS/CCK/PTN/SLC7A11/MEIS2/JUND/DUSP1/PML/JUN/DNM2/EGR1/AQP1/YAP1/HIF1A/SLC1A3/ATM/HSPA5/NAMPT	19
BP	GO:0009615	response to virus	19/442	149/5658	0.0222217	0.0634347	0.0378136	HSPB1/STMN1/CLU/PLSCR1/CFL1/ENO1/PML/ITCH/BST2/IL33/MAP3K14/SEC14L1/DDIT4/STAT1/IFIT3/HTRA1/STAT2/IFI6/BIRC2	19
BP	GO:0032943	mononuclear cell proliferation	19/442	149/5658	0.0222217	0.0634347	0.0378136	GJA1/TFRC/CD38/FYN/CCND3/VAV3/MSN/PRNP/LGALS3/IL6ST/SH3RF1/MEF2C/RPS6/SDC4/ATM/DLG1/IL6R/BCL6/HLA-E	19
BP	GO:0046890	regulation of lipid biosynthetic process	12/442	81/5658	0.0223658	0.0636261	0.0379277	APOE/SQLE/SLC27A1/FGF1/EGR1/RGN/SF1/SORBS1/PPARGC1A/NR1D1/CAPN2/NR1H2	12
BP	GO:0042110	T cell activation	27/442	232/5658	0.0225542	0.0640689	0.0381917	GJA1/TFRC/ZFP36L1/CCL2/FYN/GLI2/PREX1/CCND3/ZMIZ1/B2M/ZEB1/GSN/MSN/PRNP/LGALS3/DTX1/STAT3/EGR1/IL6ST/SH3RF1/RPS6/SDC4/DLG1/IL6R/BCL6/AP3B1/HLA-E	27
BP	GO:0002062	chondrocyte differentiation	11/442	72/5658	0.022832	0.0647225	0.0385813	BMPR1B/BMPR1A/GLI2/SULF1/SOX9/EFEMP1/FGFR3/MEF2C/CHST11/NFIB/FGFR1	11
BP	GO:0055123	digestive system development	11/442	72/5658	0.022832	0.0647225	0.0385813	ID2/FGFR2/GLI2/DAB1/TGFB2/HIP1R/ITGA6/WLS/HIF1A/TGFB3/PDGFC	11
BP	GO:0090090	negative regulation of canonical Wnt signaling pathway	11/442	72/5658	0.022832	0.0647225	0.0385813	APOE/APC/TCF7L2/STK3/SOX9/MCC/EGR1/CSNK1A1/FOXO1/ZNRF3/WWTR1	11
BP	GO:0048709	oligodendrocyte differentiation	10/442	63/5658	0.0229629	0.0650484	0.0387755	ID2/CLU/PTPRZ1/PTN/HES5/SOX9/CD9/GSN/NRG1/ID4	10
CC	GO:0005730	nucleolus	33/441	307/5894	0.0206433	0.0651147	0.0420095	ETV6/DOCK4/DNAJB1/PLSCR1/RPL18/GLI2/RPS25/PML/CASK/DDX5/HNRNPM/MYO10/RPS27A/FGF1/RNF213/RPL23A/MAP3K14/RBPJ/NRXN1/GPRC5B/RPS6/ATM/STAT1/NFIB/POLR2L/DIAPH2/RPL12/FGFR1/TULP3/PRMT2/RPS9/BAZ2A/HSPA8	33
CC	GO:0035770	ribonucleoprotein granule	11/441	74/5894	0.0207047	0.0651147	0.0420095	ZFP36L1/ZFP36/RBPMS/TUBA1A/RPL28/ACTB/RPS6/DCP1B/IQGAP1/CTSH/GHR	11
BP	GO:1903522	regulation of blood circulation	15/442	110/5658	0.0231801	0.0656179	0.039115	GJA1/DOCK4/CD38/AGT/ITPR2/S100A1/TGFB2/ATP2B4/DLG1/GNAO1/YWHAE/ASPH/SRI/DOCK5/ADORA1	15
CC	GO:0099512	supramolecular fiber	34/441	319/5894	0.0212813	0.0664465	0.0428687	HSPB1/MT3/GJA1/STMN1/APC/ENO1/AKAP13/ACTG1/FYN/LTBP1/TUBB2B/NRP1/TUBA1A/S100A1/DNM2/NDRG1/CSNK1A1/ELN/ATP2B4/SDC4/DLG1/MAP7/DNM3/TIAM1/PPP2R5A/KAT2B/IQGAP1/MYO9B/PKD2/NEK7/TUBA1B/SRI/FBN2/FBLN1	34
BP	GO:0006836	neurotransmitter transport	13/442	91/5658	0.0235609	0.0666494	0.0397299	GLUL/NLGN1/SLC7A11/CASK/SYT1/RAP1B/SEC14L1/AQP1/NRXN1/MEF2C/SLC1A3/ADORA2B/HSPA8	13
BP	GO:0034504	protein localization to nucleus	14/442	101/5658	0.0244038	0.0688421	0.0410369	APOD/GLUL/AGT/FYN/SOX9/PML/TPR/STAT3/ANGPT1/TSC2/APPL2/TXNIP/YWHAE/MORC3	14
BP	GO:0031667	response to nutrient levels	23/442	192/5658	0.0250066	0.0696481	0.0415174	APOE/MT3/GLUL/CCK/PTN/TNC/GABARAPL2/ZFP36/MAP3K5/FYN/JUN/FAS/GSN/SST/SORL1/FOXO1/PPARGC1A/ABCA1/STAT1/HSPA5/APPL2/NAMPT/HSPA8	23
BP	GO:0009144	purine nucleoside triphosphate metabolic process	11/442	73/5658	0.0250685	0.0696481	0.0415174	HSPA1A/HSPA1B/TMSB4X/ENO1/TPR/STAT3/PPARGC1A/HIF1A/DDIT4/NUP160/HSPA8	11
BP	GO:0009199	ribonucleoside triphosphate metabolic process	11/442	73/5658	0.0250685	0.0696481	0.0415174	HSPA1A/HSPA1B/TMSB4X/ENO1/TPR/STAT3/PPARGC1A/HIF1A/DDIT4/NUP160/HSPA8	11
BP	GO:0006913	nucleocytoplasmic transport	16/442	121/5658	0.0252728	0.0700777	0.0417735	RPS15/APOD/TCF7L2/AGT/AKAP13/HNRNPA2B1/PML/TPR/STAT3/SRSF6/ANGPT1/TSC2/APPL2/TXNIP/NUP160/YWHAE	16
BP	GO:0051169	nuclear transport	16/442	121/5658	0.0252728	0.0700777	0.0417735	RPS15/APOD/TCF7L2/AGT/AKAP13/HNRNPA2B1/PML/TPR/STAT3/SRSF6/ANGPT1/TSC2/APPL2/TXNIP/NUP160/YWHAE	16
BP	GO:0030307	positive regulation of cell growth	10/442	64/5658	0.0253919	0.0703599	0.0419417	SEMA5A/CD38/LRP1/NRP1/FN1/DSCAM/TGFB2/SYT1/ADAM10/LGI1	10
MF	GO:0003714	transcription corepressor activity	14/438	96/5628	0.0157587	0.0703976	0.0499004	HSPA1A/DNAJB1/TOB2/MEIS2/TOB1/NCOR2/ZEB1/SF1/YAP1/HIPK2/ID4/WWTR1/TBL1X/NR1D1	14
BP	GO:0006511	ubiquitin-dependent protein catabolic process	22/442	182/5658	0.0255432	0.0706618	0.0421217	HSPA1A/HSPA1B/CLU/SMURF2/PML/ITCH/IL33/UBB/SMARCC1/RPS27A/RNF213/CSNK1A1/HIPK2/ZNRF3/UBC/WWTR1/TBL1X/HSPA5/GNA12/UBAP1/VPS28/BIRC2	22
CC	GO:0044798	nuclear transcription factor complex	12/441	85/5894	0.0234162	0.0714236	0.0460798	FOS/TCF7L2/JUND/SOX9/JUN/STAT3/YAP1/TADA3/HIF1A/HIPK2/NR1D1/NR1H2	12
CC	GO:0010008	endosome membrane	24/441	210/5894	0.0235336	0.0714236	0.0460798	TFRC/LDLRAD4/ANTXR1/TF/TMBIM1/SLC9A9/ZFYVE16/B2M/PML/CD63/ITCH/UBB/RPS27A/NDRG1/SORL1/EPHB1/WLS/ATP6V0E1/UBC/APPL2/UBAP1/VPS28/TAB2/HLA-E	24
BP	GO:0022402	cell cycle process	47/442	455/5658	0.026172	0.0717875	0.0427927	HSPA1A/HSP90AA1/HSPA1B/ID2/STMN1/PRKCA/APC/PDGFRB/CFL1/TCF7L2/ARHGEF10/ZFP36L1/TAOK3/CCL2/CCND3/DUSP1/PHIP/WDR6/TUBA1A/SOX9/PML/TPR/DNM2/PRNP/TGFB2/UBB/CCNY/CRADD/TACC1/CDC73/ID4/ATP2B4/RPS6/ATM/DACH1/DLG1/CGRRF1/STAMBP/TPD52L1/BCL6/YWHAE/KAT2B/FGFR1/PKD2/PRMT2/NEK7/MYO16	47
BP	GO:0044706	multi-multicellular organism process	14/442	102/5658	0.0263476	0.0722204	0.0430508	GJA1/FOS/PTN/CD38/AGT/SMURF2/SERPINE2/NAMPT/SH3PXD2B/TGFB3/CAPN2/AR/FBLN1/ARID1A	14
BP	GO:0032271	regulation of protein polymerization	12/442	83/5658	0.0266104	0.0728918	0.043451	HSPA1A/HSP90AA1/HSPA1B/TMSB4X/STMN1/PREX1/GSN/KANK1/HIP1R/ELN/DLG1/RICTOR	12
BP	GO:0045787	positive regulation of cell cycle	18/442	142/5658	0.0270223	0.0739703	0.0440939	ID2/FGFR2/PRKCA/NR4A3/PDGFRB/MEIS2/CCND3/PHIP/PML/TPR/TGFB2/CCNY/CRADD/CDC73/ATM/PGGT1B/FGFR1/PKD2	18
CC	GO:0099503	secretory vesicle	40/441	392/5894	0.0252055	0.074926	0.0483394	HSPA1A/HSP90AA1/MT3/HSPA1B/TMSB4X/CLU/CD38/ITPR2/LRP1/TF/CHI3L1/CPE/TMBIM1/PPIA/CTNNA1/SERPINE2/FN1/B2M/CD63/PSAP/CD9/PTPRJ/GSN/BST2/LGALS3/TGFB2/SYT1/RAP1B/GDI2/SPAG9/ADAM10/ABCC4/ITGAV/STK10/TGFB3/IQGAP1/SRI/CTSH/HGF/HSPA8	40
CC	GO:0044440	endosomal part	25/441	223/5894	0.0260793	0.076996	0.0496749	TFRC/LDLRAD4/ANTXR1/TF/TMBIM1/SLC9A9/ZFYVE16/B2M/PML/CD63/ITCH/UBB/RPS27A/NDRG1/SORL1/EPHB1/WLS/ATP6V0E1/UBC/APPL2/UBAP1/VPS28/TAB2/CTSH/HLA-E	25
MF	GO:0016462	pyrophosphatase activity	32/438	281/5628	0.0174945	0.0771029	0.0546533	HSPA1A/HSP90AA1/HSPA1B/GNA14/MYO1E/AGAP1/RGS20/TUBB2B/RGS6/ABCD4/TUBA1A/DDX5/DNM2/GNG7/MYO10/RNF213/RAP1B/RGS16/ABCA1/ABCC4/ATP6V0E1/ATP2B4/HSPA5/DICER1/GNAO1/GNA12/RERG/DNM3/MYO9B/TUBA1B/HSPA8/MYO16	32
BP	GO:0019941	modification-dependent protein catabolic process	22/442	184/5658	0.0285187	0.0775962	0.0462553	HSPA1A/HSPA1B/CLU/SMURF2/PML/ITCH/IL33/UBB/SMARCC1/RPS27A/RNF213/CSNK1A1/HIPK2/ZNRF3/UBC/WWTR1/TBL1X/HSPA5/GNA12/UBAP1/VPS28/BIRC2	22
BP	GO:0045088	regulation of innate immune response	22/442	184/5658	0.0285187	0.0775962	0.0462553	HSPA1A/APOE/HSPA1B/CADM1/PLSCR1/FYN/S100A1/ITCH/UBB/RPS27A/RPS6KA5/SOCS3/SEC14L1/UBC/STAT1/NR1D1/APPL2/JAK1/TAB2/BIRC2/NR1H2/HLA-E	22
BP	GO:0008360	regulation of cell shape	12/442	84/5658	0.0289403	0.0786905	0.0469076	DLC1/PTN/CCL2/FYN/PHIP/FN1/SEMA3E/MSN/MYO10/S100B/DLG1/GNA12	12
MF	GO:0000977	RNA polymerase II regulatory region sequence-specific DNA binding	39/438	358/5628	0.0182798	0.079262	0.0561838	FOS/NR4A3/ETV6/TCF7L2/NR4A2/ENO1/MEIS2/HES5/NR4A1/CUX1/JUND/GLI2/WBP2/SOX9/PRRX1/JUN/ZEB1/SMARCC1/STAT3/EGR1/ACTB/JARID2/RBPJ/LHX2/YAP1/MEF2C/HIF1A/STAT1/DACH1/NR1D1/NFIB/EAF2/BCL6/ST18/KAT2B/STAT2/AR/NCOA2/NR1H2	39
MF	GO:0001085	RNA polymerase II transcription factor binding	11/438	70/5628	0.0183248	0.079262	0.0561838	ID2/FOS/TCF7L2/ZMIZ1/JUN/STAT3/RBPJ/ID1/HIPK2/ID4/AR	11
BP	GO:0051259	protein complex oligomerization	23/442	195/5658	0.0293561	0.0793434	0.0472968	APOE/GJA1/CLU/GLUL/APC/CAMK2G/CCK/NLGN1/LIMS1/CTNNA1/B2M/FUS/PRNP/RNF213/SYT1/SORL1/SPAG9/ADCY8/LGI1/APPL2/PKD2/BIRC2/AR	23
MF	GO:0016887	ATPase activity	14/438	98/5628	0.0186445	0.0800097	0.0567138	HSPA1A/HSP90AA1/HSPA1B/MYO1E/ABCD4/MYO10/RNF213/ABCA1/ABCC4/ATP6V0E1/ATP2B4/HSPA5/MYO9B/HSPA8	14
BP	GO:0043632	modification-dependent macromolecule catabolic process	22/442	185/5658	0.0301019	0.0808319	0.0481841	HSPA1A/HSPA1B/CLU/SMURF2/PML/ITCH/IL33/UBB/SMARCC1/RPS27A/RNF213/CSNK1A1/HIPK2/ZNRF3/UBC/WWTR1/TBL1X/HSPA5/GNA12/UBAP1/VPS28/BIRC2	22
BP	GO:0042391	regulation of membrane potential	18/442	144/5658	0.0305963	0.081646	0.0486694	GJA1/CCK/GABRB1/PTN/NLGN1/GABRG1/NLGN4X/JUN/UBB/FGF12/NRXN1/MEF2C/DLG1/IGSF11/YWHAE/IFI6/SRI/ADORA1	18
CC	GO:0005739	mitochondrion	27/441	248/5894	0.0297655	0.0849883	0.0548312	HSPA1A/MT3/HSPA1B/GJA1/PRKCA/CLU/GLUL/FYN/SLC27A1/LGALS3/UBB/RPS27A/STAT3/JARID2/FOXO1/HIP1R/PPARGC1A/UBC/DDIT4/IFIT3/HSPA5/TXNIP/YWHAE/IFI6/SRI/TRAK1/CAPN2	27
BP	GO:0043900	regulation of multi-organism process	21/442	176/5658	0.0325368	0.0857732	0.0511296	APOE/PRKCA/PLSCR1/CFL1/SMURF2/ZFP36/PPIA/PML/JUN/ITCH/DDX5/GSN/BST2/SEC14L1/ITGAV/SASH1/STAT1/POLR2L/HTRA1/POLR2J/BIRC2	21
BP	GO:0007548	sex differentiation	15/442	115/5658	0.0330938	0.087012	0.0518681	GJA1/PDGFRB/BMPR1B/BMPR1A/CNTFR/CTNNA1/SOX9/TGFB2/UBB/SF1/MERTK/ATM/DACH1/HSPA5/AR	15
BP	GO:0051260	protein homooligomerization	15/442	115/5658	0.0330938	0.087012	0.0518681	APOE/CLU/GLUL/APC/NLGN1/B2M/FUS/PRNP/RNF213/SYT1/SPAG9/ADCY8/LGI1/APPL2/PKD2	15
BP	GO:0043604	amide biosynthetic process	27/442	240/5658	0.033133	0.087012	0.0518681	HSPB1/RPS15/SLC7A11/ZFP36L1/ZFP36/RPL18/RPL8/TOB1/RPS25/TPR/RPS27A/RPL28/STAT3/RPL10/RPL23A/RPL37/RPLP2/RPS24/RPS6/RPL19/HNRNPD/RPS12/RPLP1/RPL12/RPL37A/RPS9/RPL31	27
BP	GO:0042594	response to starvation	10/442	67/5658	0.033778	0.0885856	0.0528061	GLUL/GABARAPL2/ZFP36/MAP3K5/JUN/FAS/FOXO1/PPARGC1A/HSPA5/HSPA8	10
BP	GO:0051480	regulation of cytosolic calcium ion concentration	19/442	156/5658	0.0339363	0.0889434	0.0530194	GJA1/CD38/AGT/ITPR2/LRP1/FYN/FGF2/PML/PRNP/UBASH3B/ADCY8/PLCE1/ITGAV/ATP2B4/S1PR1/YWHAE/PKD2/SRI/ADORA1	19
BP	GO:1901991	negative regulation of mitotic cell cycle phase transition	13/442	96/5658	0.0348522	0.0907986	0.0541253	APC/ZFP36L1/TAOK3/CCL2/DUSP1/PML/TPR/CRADD/CDC73/ATM/PKD2/PRMT2/MYO16	13
CC	GO:0044427	chromosomal part	31/441	295/5894	0.0322336	0.0914339	0.0589896	APC/TCF7L2/HMBOX1/HNRNPA2B1/JUND/NCOR2/WBP2/PML/JUN/TPR/SMARCC1/STAT3/CSNK1A1/ACTB/PPARGC1A/CDC73/MEF2C/HIF1A/ATM/STAT1/HP1BP3/NR1D1/HMGN3/BCL6/NUP160/PPP2R5A/KAT2B/CAPN2/AR/BAZ2A/ARID1A	31
BP	GO:0042098	T cell proliferation	14/442	106/5658	0.0352791	0.0914601	0.0545196	GJA1/TFRC/FYN/CCND3/MSN/PRNP/LGALS3/IL6ST/SH3RF1/RPS6/SDC4/DLG1/IL6R/HLA-E	14
BP	GO:0051607	defense response to virus	14/442	106/5658	0.0352791	0.0914601	0.0545196	PLSCR1/PML/ITCH/BST2/IL33/MAP3K14/SEC14L1/DDIT4/STAT1/IFIT3/HTRA1/STAT2/IFI6/BIRC2	14
BP	GO:0060348	bone development	15/442	116/5658	0.0354001	0.0917153	0.0546717	FGFR2/GJA1/AKAP13/BMPR1B/SULF1/SOX9/FGFR3/WASF2/RGN/ABI1/MEF2C/SH3PXD2B/TGFB3/TULP3/PDGFC	15
BP	GO:0030856	regulation of epithelial cell differentiation	11/442	77/5658	0.0356156	0.0922149	0.0549696	ZFP36L1/HES5/ZFP36/SOX9/ZEB1/SRSF6/ID1/YAP1/WWTR1/STAT1/PTCH1	11
MF	GO:0035091	phosphatidylinositol binding	14/438	100/5628	0.0219146	0.0925849	0.0656276	MYO1E/ITPR2/GAB2/ZFYVE16/PIK3C2A/MYO10/SYT1/PARD3/HIP1R/HIP1/APPL2/SH3PXD2B/IQGAP1/TULP3	14
BP	GO:0044772	mitotic cell cycle phase transition	23/442	199/5658	0.0360223	0.0932084	0.0555618	HSP90AA1/ID2/APC/ZFP36L1/TAOK3/CCL2/CCND3/DUSP1/TUBA1A/PML/TPR/DNM2/CCNY/CRADD/CDC73/ID4/RPS6/ATM/TPD52L1/YWHAE/PKD2/PRMT2/MYO16	23
BP	GO:0060538	skeletal muscle organ development	10/442	68/5658	0.0369594	0.0946451	0.0564182	FOS/CNTFR/DDX5/EGR1/S100B/EPHB1/ELN/MEF2C/MEGF10/CFLAR	10
BP	GO:0006914	autophagy	20/442	168/5658	0.0371381	0.0946451	0.0564182	HSPB1/HSP90AA1/MT3/CLU/GABARAPL2/WDR6/PSAP/STAT3/TSC2/FOXO1/PPARGC1A/HIF1A/ATP6V0E1/ATM/NAMPT/VPS28/TAB2/EPM2A/HGF/HSPA8	20
BP	GO:0061919	process utilizing autophagic mechanism	20/442	168/5658	0.0371381	0.0946451	0.0564182	HSPB1/HSP90AA1/MT3/CLU/GABARAPL2/WDR6/PSAP/STAT3/TSC2/FOXO1/PPARGC1A/HIF1A/ATP6V0E1/ATM/NAMPT/VPS28/TAB2/EPM2A/HGF/HSPA8	20
BP	GO:0019725	cellular homeostasis	37/442	353/5658	0.0377525	0.0950829	0.0566792	APOE/MT3/GJA1/TFRC/MAP4K4/CD38/AGT/ITPR2/LRP1/TF/CCL2/SLC9A9/FYN/FGF2/PML/PRNP/UBASH3B/ADCY8/RGN/PLCE1/AQP1/FOXO1/PPARGC1A/HIF1A/ITGAV/ATP6V0E1/ATP2B4/NR1D1/HMGN3/SLC4A4/S1PR1/YWHAE/TIAM1/PKD2/SRI/ADORA1/PRDX1	37
BP	GO:0043122	regulation of I-kappaB kinase/NF-kappaB signaling	15/442	117/5658	0.0378208	0.095196	0.0567466	HSPB1/GJA1/AKAP13/FYN/BST2/ANGPT1/S100B/MAP3K14/WLS/GPRC5B/STAT1/NR1D1/TAB2/BIRC2/CFLAR	15
BP	GO:0098662	inorganic cation transmembrane transport	27/442	243/5658	0.0379495	0.0954019	0.0568693	TMSB4X/IL1RAPL1/ITPR2/TF/SLC9A9/FYN/FGF2/SLC3A2/S100A1/CD63/DNM2/PRNP/SLC20A2/UBASH3B/FGF12/RGN/PLCE1/AQP1/ITGAV/SLC1A3/ATP6V0E1/ATP2B4/DLG1/YWHAE/UTRN/PKD2/SRI	27
BP	GO:0070647	protein modification by small protein conjugation or removal	34/442	320/5658	0.038317	0.095985	0.0572169	HSPA1A/HSP90AA1/HSPA1B/APC/SMURF2/FYN/ZMIZ1/TPR/ITCH/IL33/UBB/RPS27A/DTX1/EGR1/RNF213/ANGPT1/ACTB/SOCS3/CDC73/SH3RF1/TADA3/HIF1A/SASH1/ZNRF3/UBC/WWTR1/HSPA5/STAMBP/NUP160/VPS28/DCUN1D1/KAT2B/BIRC2/AR	34
BP	GO:0044770	cell cycle phase transition	24/442	211/5658	0.0384697	0.095985	0.0572169	HSP90AA1/ID2/APC/ZFP36L1/TAOK3/CCL2/CCND3/DUSP1/TUBA1A/PML/TPR/DNM2/CCNY/CRADD/CDC73/ID4/ATP2B4/RPS6/ATM/TPD52L1/YWHAE/PKD2/PRMT2/MYO16	24
BP	GO:0009141	nucleoside triphosphate metabolic process	11/442	78/5658	0.0386773	0.095985	0.0572169	HSPA1A/HSPA1B/TMSB4X/ENO1/TPR/STAT3/PPARGC1A/HIF1A/DDIT4/NUP160/HSPA8	11
BP	GO:1902806	regulation of cell cycle G1/S phase transition	11/442	78/5658	0.0386773	0.095985	0.0572169	ID2/CCL2/CCND3/PML/CRADD/CDC73/ATP2B4/ATM/PKD2/PRMT2/MYO16	11
BP	GO:0051276	chromosome organization	36/442	343/5658	0.0394154	0.0977568	0.0582731	HSP90AA1/MT3/PRKCA/APC/TCF7L2/HMBOX1/PRDM16/HNRNPA2B1/DUSP1/ZMIZ1/WBP2/SOX9/PML/TPR/UBB/TET1/SMARCC1/RPS27A/ACTB/RPS6KA5/JARID2/PPARGC1A/CDC73/TADA3/UBC/ATM/TBL1X/HP1BP3/HNRNPD/HMGN3/BCL6/KAT2B/PRMT2/NEK7/BAZ2A/ARID1A	36
BP	GO:0043161	proteasome-mediated ubiquitin-dependent protein catabolic process	17/442	138/5658	0.039462	0.0978128	0.0583065	HSPA1A/HSPA1B/CLU/SMURF2/PML/ITCH/IL33/UBB/SMARCC1/RPS27A/CSNK1A1/UBC/WWTR1/TBL1X/HSPA5/GNA12/BIRC2	17
BP	GO:0032984	protein-containing complex disassembly	12/442	88/5658	0.0397438	0.0984512	0.0586871	STMN1/APC/SEMA5A/CFL1/GABARAPL2/GSN/SMARCC1/CSNK1A1/DDIT4/ASPH/HSPA8/ARID1A	12
BP	GO:0032504	multicellular organism reproduction	28/442	255/5658	0.0398828	0.0985622	0.0587532	GJA1/CADM1/ETV6/GABRB1/PTN/TOB2/BMPR1B/ZMIZ1/NCOR2/SERPINE2/SOX9/CD9/DNM2/TGFB2/UBB/EGR1/RGN/ADAM10/MERTK/ATP2B4/RPS6/ATM/HSPA5/SH3PXD2B/BCL6/DIAPH2/TGFB3/AR	28
BP	GO:0009416	response to light stimulus	13/442	98/5658	0.0403079	0.0993296	0.0592106	ID2/FOS/CCK/PTN/SLC7A11/MEIS2/JUND/DUSP1/PML/DNM2/AQP1/HIF1A/SLC1A3	13
BP	GO:0018105	peptidyl-serine phosphorylation	13/442	98/5658	0.0403079	0.0993296	0.0592106	HSP90AA1/PRKCA/PRKG1/ANGPT1/CSNK1A1/RPS6KA5/HIPK2/ATP2B4/ATM/DDIT4/RICTOR/MORC3/HGF	13
BP	GO:0042180	cellular ketone metabolic process	10/442	69/5658	0.0403427	0.0993296	0.0592106	NR4A3/SLC7A11/NCOR2/EGR1/RGN/PPARGC1A/ATP2B4/NR1D1/APPL2/NR1H2	10
BP	GO:0051384	response to glucocorticoid	10/442	69/5658	0.0403427	0.0993296	0.0592106	FOS/ZFP36L1/AKAP13/ZFP36/DUSP1/S100B/AQP1/FOXO1/DDIT4/CFLAR	10
MF	GO:1901681	sulfur compound binding	14/438	101/5628	0.0237027	0.0993692	0.0704365	APOE/FGFR2/SEMA5A/PTN/LRP1/FGF2/NRP1/SERPINE2/FN1/HPSE2/FGF1/FGFR1/TGFBR3/PTCH1	14
BP	GO:0048705	skeletal system morphogenesis	14/442	108/5658	0.0404837	0.0996164	0.0593816	FGFR2/BMPR1B/SOX9/PRRX1/ZEB1/FGFR3/MEF2C/DLG1/CHST11/SH3PXD2B/TGFB3/FGFR1/TULP3/FBN2	14

## Sheet: IN-PV
ONTOLOGY	ID	Description	GeneRatio	BgRatio	pvalue	p.adjust	qvalue	geneID	Count
CC	GO:0045211	postsynaptic membrane	20/127	110/5894	8.93705e-14	2.413e-11	1.83445e-11	CAMK2N1/KCNC2/ERBB4/SLC6A1/ADCY8/GRM7/GRIN3A/PCDH17/SHISA6/ADRA1A/SORCS3/GRIK3/NRGN/GRIK1/GRID1/DCC/GRIN2D/CLSTN2/SLC6A11/GABRA2	20
CC	GO:0097060	synaptic membrane	22/127	149/5894	4.02465e-13	5.43328e-11	4.13056e-11	CAMK2N1/GAD2/KCNC2/ERBB4/SLC6A1/ADCY8/GRM7/GRIN3A/PCDH17/SHISA6/ADRA1A/SORCS3/GRIK3/NRGN/GRIK1/GRID1/DCC/SNCAIP/GRIN2D/CLSTN2/SLC6A11/GABRA2	22
CC	GO:0045202	synapse	33/127	434/5894	6.25835e-11	5.63251e-09	4.28203e-09	CAMK2N1/GAD2/KCNC2/ERBB4/UNC5C/NRG1/SLC6A1/C1QL1/ADCY8/DSCAML1/GRM7/SLC17A7/GRIN3A/PCDH17/SHISA6/ADRA1A/SORCS3/GRIK3/NRGN/GRIK1/GRID1/LGI3/DCC/MT3/SNCAIP/BCAN/GRIN2D/CLSTN2/KCNK2/SLC6A11/GABRA2/COL4A5/IL1RAPL2	33
CC	GO:0034703	cation channel complex	13/127	61/5894	3.17726e-10	2.14465e-08	1.63043e-08	KCNIP4/KCNC2/DPP6/GRIN3A/KCNAB1/KCNQ5/SHISA6/KCNQ1/GRIK3/GRIK1/GRIN2D/KCNK2/RYR3	13
CC	GO:0043005	neuron projection	32/127	447/5894	6.27654e-10	2.601e-08	1.97737e-08	CAMK2N1/KIRREL3/GAD2/KCNC2/DNER/UNC5C/NRG1/SLC6A1/C1QL1/ADCY8/DSCAML1/GRM7/SLC17A7/GRIN3A/TTLL7/CRH/KCNAB1/SHISA6/GNAO1/GRIK3/NRGN/LGI3/DCC/SLC1A4/TAC1/MT3/HTR2C/BRINP3/KCNK2/FEZ1/SLC6A11/GABRA2	32
CC	GO:0044456	synapse part	27/127	324/5894	6.51992e-10	2.601e-08	1.97737e-08	CAMK2N1/GAD2/KCNC2/ERBB4/SLC6A1/C1QL1/ADCY8/GRM7/SLC17A7/GRIN3A/PCDH17/SHISA6/ADRA1A/SORCS3/GRIK3/NRGN/GRIK1/GRID1/LGI3/DCC/MT3/SNCAIP/GRIN2D/CLSTN2/KCNK2/SLC6A11/GABRA2	27
CC	GO:0098794	postsynapse	22/127	215/5894	6.74334e-10	2.601e-08	1.97737e-08	CAMK2N1/KCNC2/ERBB4/SLC6A1/ADCY8/GRM7/SLC17A7/GRIN3A/PCDH17/SHISA6/ADRA1A/SORCS3/GRIK3/NRGN/GRIK1/GRID1/DCC/MT3/GRIN2D/CLSTN2/SLC6A11/GABRA2	22
CC	GO:0036477	somatodendritic compartment	25/127	289/5894	1.43878e-09	4.85587e-08	3.6916e-08	CAMK2N1/KIRREL3/KCNC2/DNER/UNC5C/ADCY8/GRM7/GRIN3A/TTLL7/ASTN2/CRH/KCNAB1/SHISA6/GNAO1/GRIK3/NRGN/SLC1A4/TAC1/MT3/SNCAIP/HTR2C/BRINP3/KCNK2/FEZ1/GABRA2	25
BP	GO:0099536	synaptic signaling	25/123	241/5658	3.22798e-11	6.68132e-08	6.07537e-08	GAD2/NRG1/SLC6A1/ADCY8/GRM7/SLC17A7/GRIN3A/CRH/PCDH17/PLP1/SHISA6/ADRA1A/SORCS3/GRIK3/NRGN/GRIK1/GRID1/DCC/SLC1A4/TAC1/SNCAIP/HTR2C/GRIN2D/CLSTN2/GABRA2	25
BP	GO:0007268	chemical synaptic transmission	24/123	232/5658	9.03695e-11	6.68132e-08	6.07537e-08	GAD2/SLC6A1/ADCY8/GRM7/SLC17A7/GRIN3A/CRH/PCDH17/PLP1/SHISA6/ADRA1A/SORCS3/GRIK3/NRGN/GRIK1/GRID1/DCC/SLC1A4/TAC1/SNCAIP/HTR2C/GRIN2D/CLSTN2/GABRA2	24
BP	GO:0098916	anterograde trans-synaptic signaling	24/123	232/5658	9.03695e-11	6.68132e-08	6.07537e-08	GAD2/SLC6A1/ADCY8/GRM7/SLC17A7/GRIN3A/CRH/PCDH17/PLP1/SHISA6/ADRA1A/SORCS3/GRIK3/NRGN/GRIK1/GRID1/DCC/SLC1A4/TAC1/SNCAIP/HTR2C/GRIN2D/CLSTN2/GABRA2	24
CC	GO:0042734	presynaptic membrane	12/127	58/5894	2.28468e-09	6.85405e-08	5.21068e-08	GAD2/KCNC2/ERBB4/SLC6A1/ADCY8/GRM7/PCDH17/ADRA1A/GRIK3/GRIK1/SNCAIP/SLC6A11	12
CC	GO:0099055	integral component of postsynaptic membrane	10/127	37/5894	3.21716e-09	7.89667e-08	6.00332e-08	ERBB4/SLC6A1/PCDH17/SHISA6/ADRA1A/SORCS3/GRID1/DCC/CLSTN2/SLC6A11	10
BP	GO:0099537	trans-synaptic signaling	24/123	238/5658	1.55044e-10	8.5972e-08	7.81749e-08	GAD2/SLC6A1/ADCY8/GRM7/SLC17A7/GRIN3A/CRH/PCDH17/PLP1/SHISA6/ADRA1A/SORCS3/GRIK3/NRGN/GRIK1/GRID1/DCC/SLC1A4/TAC1/SNCAIP/HTR2C/GRIN2D/CLSTN2/GABRA2	24
CC	GO:0034702	ion channel complex	14/127	90/5894	5.11029e-09	1.14439e-07	8.70002e-08	KCNIP4/KCNC2/DPP6/GRIN3A/KCNAB1/KCNQ5/SHISA6/KCNQ1/GRIK3/GRIK1/GRIN2D/KCNK2/GABRA2/RYR3	14
CC	GO:0099699	integral component of synaptic membrane	11/127	50/5894	5.51001e-09	1.14439e-07	8.70002e-08	ERBB4/SLC6A1/ADCY8/PCDH17/SHISA6/ADRA1A/SORCS3/GRID1/DCC/CLSTN2/SLC6A11	11
CC	GO:0098936	intrinsic component of postsynaptic membrane	10/127	40/5894	7.41207e-09	1.42947e-07	1.08673e-07	ERBB4/SLC6A1/PCDH17/SHISA6/ADRA1A/SORCS3/GRID1/DCC/CLSTN2/SLC6A11	10
CC	GO:1902495	transmembrane transporter complex	14/127	99/5894	1.82387e-08	3.28297e-07	2.49583e-07	KCNIP4/KCNC2/DPP6/GRIN3A/KCNAB1/KCNQ5/SHISA6/KCNQ1/GRIK3/GRIK1/GRIN2D/KCNK2/GABRA2/RYR3	14
CC	GO:1990351	transporter complex	14/127	100/5894	2.08252e-08	3.47966e-07	2.64536e-07	KCNIP4/KCNC2/DPP6/GRIN3A/KCNAB1/KCNQ5/SHISA6/KCNQ1/GRIK3/GRIK1/GRIN2D/KCNK2/GABRA2/RYR3	14
CC	GO:0098793	presynapse	18/127	173/5894	2.1909e-08	3.47966e-07	2.64536e-07	GAD2/KCNC2/ERBB4/SLC6A1/C1QL1/ADCY8/GRM7/SLC17A7/PCDH17/ADRA1A/GRIK3/GRIK1/LGI3/MT3/SNCAIP/KCNK2/SLC6A11/GABRA2	18
CC	GO:0099240	intrinsic component of synaptic membrane	11/127	57/5894	2.39519e-08	3.55233e-07	2.7006e-07	ERBB4/SLC6A1/ADCY8/PCDH17/SHISA6/ADRA1A/SORCS3/GRID1/DCC/CLSTN2/SLC6A11	11
CC	GO:0030424	axon	20/127	216/5894	2.49979e-08	3.55233e-07	2.7006e-07	KIRREL3/GAD2/KCNC2/UNC5C/NRG1/SLC6A1/C1QL1/ADCY8/DSCAML1/GRM7/SLC17A7/CRH/KCNAB1/GRIK3/NRGN/DCC/TAC1/MT3/KCNK2/FEZ1	20
CC	GO:0043025	neuronal cell body	18/127	181/5894	4.46234e-08	6.02417e-07	4.57977e-07	CAMK2N1/KCNC2/DNER/UNC5C/ADCY8/GRIN3A/TTLL7/ASTN2/CRH/KCNAB1/GRIK3/NRGN/SLC1A4/TAC1/SNCAIP/BRINP3/KCNK2/FEZ1	18
CC	GO:0044297	cell body	19/127	208/5894	7.24507e-08	9.07292e-07	6.89754e-07	CAMK2N1/KCNC2/DNER/UNC5C/ADCY8/GRIN3A/TTLL7/ASTN2/CRH/KCNAB1/GNAO1/GRIK3/NRGN/SLC1A4/TAC1/SNCAIP/BRINP3/KCNK2/FEZ1	19
CC	GO:0030425	dendrite	19/127	213/5894	1.06143e-07	1.24602e-06	9.4727e-07	CAMK2N1/KIRREL3/KCNC2/DNER/UNC5C/ADCY8/GRM7/TTLL7/KCNAB1/SHISA6/GNAO1/GRIK3/NRGN/SLC1A4/MT3/HTR2C/BRINP3/FEZ1/GABRA2	19
CC	GO:0097447	dendritic tree	19/127	214/5894	1.14407e-07	1.28708e-06	9.78483e-07	CAMK2N1/KIRREL3/KCNC2/DNER/UNC5C/ADCY8/GRM7/TTLL7/KCNAB1/SHISA6/GNAO1/GRIK3/NRGN/SLC1A4/MT3/HTR2C/BRINP3/FEZ1/GABRA2	19
BP	GO:0050804	modulation of chemical synaptic transmission	18/123	158/5658	5.70362e-09	2.08277e-06	1.89388e-06	SLC6A1/ADCY8/GRM7/GRIN3A/CRH/PCDH17/SHISA6/ADRA1A/SORCS3/GRIK3/NRGN/GRIK1/GRID1/DCC/TAC1/SNCAIP/GRIN2D/CLSTN2	18
BP	GO:0099177	regulation of trans-synaptic signaling	18/123	159/5658	6.31652e-09	2.08277e-06	1.89388e-06	SLC6A1/ADCY8/GRM7/GRIN3A/CRH/PCDH17/SHISA6/ADRA1A/SORCS3/GRIK3/NRGN/GRIK1/GRID1/DCC/TAC1/SNCAIP/GRIN2D/CLSTN2	18
BP	GO:0007420	brain development	25/123	309/5658	6.57321e-09	2.08277e-06	1.89388e-06	KIRREL3/KCNC2/ERBB4/ZEB2/UNC5C/NRG1/SLIT2/DSCAML1/SEMA6D/SLC17A7/PRKG1/CRH/MAFB/KCNAB1/RFX4/PLP1/GNAO1/NRGN/CA10/MT3/BCAN/GRIN2D/FEZ1/SLC6A11/DLX1	25
CC	GO:0098978	glutamatergic synapse	14/127	121/5894	2.43355e-07	2.34664e-06	1.78399e-06	ERBB4/NRG1/ADCY8/GRIN3A/PCDH17/SHISA6/ADRA1A/SORCS3/GRIK3/NRGN/GRID1/BCAN/CLSTN2/IL1RAPL2	14
BP	GO:0007417	central nervous system development	30/123	440/5658	8.94218e-09	2.47922e-06	2.25437e-06	KIRREL3/KCNC2/DNER/ERBB4/NAV2/ZEB2/UNC5C/NRG1/SLIT2/DSCAML1/SEMA6D/SLC17A7/PRKG1/CRH/MAFB/KCNAB1/RFX4/PLP1/GNAO1/NRGN/CA10/GRIK1/DCC/MT3/BCAN/GRIN2D/FEZ1/SLC6A11/DLX1/IL1RAPL2	30
CC	GO:0032279	asymmetric synapse	13/127	111/5894	5.83877e-07	5.4361e-06	4.13271e-06	CAMK2N1/ERBB4/ADCY8/GRM7/GRIN3A/SHISA6/SORCS3/NRGN/GRID1/DCC/MT3/GRIN2D/CLSTN2	13
BP	GO:0060322	head development	25/123	333/5658	3.00989e-08	7.41771e-06	6.74498e-06	KIRREL3/KCNC2/ERBB4/ZEB2/UNC5C/NRG1/SLIT2/DSCAML1/SEMA6D/SLC17A7/PRKG1/CRH/MAFB/KCNAB1/RFX4/PLP1/GNAO1/NRGN/CA10/MT3/BCAN/GRIN2D/FEZ1/SLC6A11/DLX1	25
CC	GO:0098984	neuron to neuron synapse	13/127	118/5894	1.19021e-06	1.07119e-05	8.14353e-06	CAMK2N1/ERBB4/ADCY8/GRM7/GRIN3A/SHISA6/SORCS3/NRGN/GRID1/DCC/MT3/GRIN2D/CLSTN2	13
MF	GO:0022839	ion gated channel activity	14/118	109/5628	4.39086e-08	1.26022e-05	1.0109e-05	KCNIP4/KCNC2/SLC17A7/GRIN3A/KCNAB1/KCNQ5/KCNQ1/GRIK3/GRIK1/GRID1/GRIN2D/KCNK2/GABRA2/RYR3	14
MF	GO:0022836	gated channel activity	14/118	114/5628	7.84145e-08	1.26022e-05	1.0109e-05	KCNIP4/KCNC2/SLC17A7/GRIN3A/KCNAB1/KCNQ5/KCNQ1/GRIK3/GRIK1/GRID1/GRIN2D/KCNK2/GABRA2/RYR3	14
BP	GO:0007610	behavior	20/123	229/5658	7.50778e-08	1.66523e-05	1.5142e-05	KIRREL3/NAV2/NRG1/SLC6A1/C1QL1/ADCY8/SLC17A7/CRH/PCDH17/KCNAB1/GNAO1/JUN/SORCS3/NRGN/GRID1/TAC1/HTR2C/GRIN2D/KCNK2/DACH1	20
MF	GO:0005216	ion channel activity	15/118	143/5628	2.19095e-07	1.81849e-05	1.45871e-05	KCNIP4/KCNC2/SLC17A7/GRIN3A/KCNAB1/KCNQ5/KCNQ1/GRIK3/GRIK1/GRID1/SLC1A4/GRIN2D/KCNK2/GABRA2/RYR3	15
MF	GO:0022838	substrate-specific channel activity	15/118	147/5628	3.15617e-07	2.0957e-05	1.68107e-05	KCNIP4/KCNC2/SLC17A7/GRIN3A/KCNAB1/KCNQ5/KCNQ1/GRIK3/GRIK1/GRID1/SLC1A4/GRIN2D/KCNK2/GABRA2/RYR3	15
CC	GO:0098590	plasma membrane region	27/127	482/5894	2.72135e-06	2.22656e-05	1.6927e-05	CAMK2N1/GAD2/KCNC2/ERBB4/SLC6A1/ADCY8/GRM7/GRIN3A/PCDH17/SHISA6/ADRA1A/KCNQ1/SORCS3/GRIK3/NRGN/GRIK1/GRID1/DCC/SNCAIP/DUOX1/HHIP/GRIN2D/CLSTN2/KCNK2/SLC6A11/GABRA2/PARD3B	27
CC	GO:0014069	postsynaptic density	12/127	109/5894	3.16355e-06	2.51223e-05	1.90988e-05	CAMK2N1/ERBB4/ADCY8/GRIN3A/SHISA6/SORCS3/NRGN/GRID1/DCC/MT3/GRIN2D/CLSTN2	12
MF	GO:0015267	channel activity	15/118	155/5628	6.3165e-07	2.59955e-05	2.08524e-05	KCNIP4/KCNC2/SLC17A7/GRIN3A/KCNAB1/KCNQ5/KCNQ1/GRIK3/GRIK1/GRID1/SLC1A4/GRIN2D/KCNK2/GABRA2/RYR3	15
MF	GO:0022803	passive transmembrane transporter activity	15/118	155/5628	6.3165e-07	2.59955e-05	2.08524e-05	KCNIP4/KCNC2/SLC17A7/GRIN3A/KCNAB1/KCNQ5/KCNQ1/GRIK3/GRIK1/GRID1/SLC1A4/GRIN2D/KCNK2/GABRA2/RYR3	15
CC	GO:0099572	postsynaptic specialization	12/127	116/5894	6.11015e-06	4.58261e-05	3.48386e-05	CAMK2N1/ERBB4/ADCY8/GRIN3A/SHISA6/SORCS3/NRGN/GRID1/DCC/MT3/GRIN2D/CLSTN2	12
MF	GO:0046873	metal ion transmembrane transporter activity	14/118	148/5628	2.02871e-06	5.4083e-05	4.3383e-05	KCNIP4/KCNC2/SLC6A1/SLC17A7/GRIN3A/KCNAB1/KCNQ5/KCNQ1/GRIK3/GRIK1/GRIN2D/KCNK2/SLC6A11/RYR3	14
CC	GO:0098797	plasma membrane protein complex	18/127	259/5894	9.01062e-06	6.23812e-05	4.74243e-05	KCNIP4/KCNC2/DPP6/NPNT/GRIN3A/KCNAB1/KCNQ5/SHISA6/GNAO1/KCNQ1/CDH4/GRIK3/GRIK1/DUOX1/GRIN2D/RAMP1/KCNK2/HLA-A	18
BP	GO:0050877	nervous system process	24/123	355/5658	4.32467e-07	8.72011e-05	7.92925e-05	CEMIP/NAV2/SLC6A1/C1QL1/ADCY8/GRM7/SLC17A7/GRIN3A/CRH/KCNAB1/SHISA6/CSMD1/JUN/ADRA1A/KCNQ1/CCDC50/SORCS3/NRGN/SLC1A4/TAC1/HTR2C/GRIN2D/KCNK2/GABRA2	24
MF	GO:0005261	cation channel activity	11/118	102/5628	7.69182e-06	0.000141871	0.000113803	KCNIP4/KCNC2/GRIN3A/KCNAB1/KCNQ5/KCNQ1/GRIK3/GRIK1/GRIN2D/KCNK2/RYR3	11
MF	GO:0008324	cation transmembrane transporter activity	15/118	192/5628	9.38592e-06	0.000164007	0.000131559	KCNIP4/KCNC2/SLC6A1/SLC17A7/GRIN3A/KCNAB1/KCNQ5/KCNQ1/GRIK3/GRIK1/SLC1A4/GRIN2D/KCNK2/SLC6A11/RYR3	15
MF	GO:0015077	monovalent inorganic cation transmembrane transporter activity	11/118	105/5628	1.02022e-05	0.000169356	0.00013585	KCNIP4/KCNC2/SLC6A1/SLC17A7/KCNAB1/KCNQ5/KCNQ1/GRIK3/GRIK1/KCNK2/SLC6A11	11
MF	GO:0015075	ion transmembrane transporter activity	18/118	273/5628	1.22514e-05	0.000193688	0.000155368	KCNIP4/KCNC2/SLC6A1/SLC17A7/GRIN3A/KCNAB1/KCNQ5/KCNQ1/GRIK3/GRIK1/GRID1/SLC1A4/SLCO3A1/GRIN2D/KCNK2/SLC6A11/GABRA2/RYR3	18
MF	GO:0022890	inorganic cation transmembrane transporter activity	14/118	179/5628	1.88409e-05	0.000271965	0.000218158	KCNIP4/KCNC2/SLC6A1/SLC17A7/GRIN3A/KCNAB1/KCNQ5/KCNQ1/GRIK3/GRIK1/GRIN2D/KCNK2/SLC6A11/RYR3	14
MF	GO:0015318	inorganic molecular entity transmembrane transporter activity	17/118	260/5628	2.44982e-05	0.000312823	0.000250933	KCNIP4/KCNC2/SLC6A1/SLC17A7/GRIN3A/KCNAB1/KCNQ5/KCNQ1/GRIK3/GRIK1/GRID1/SLC1A4/GRIN2D/KCNK2/SLC6A11/GABRA2/RYR3	17
BP	GO:0006836	neurotransmitter transport	11/123	91/5658	3.55588e-06	0.000557516	0.000506953	GAD2/SLC6A1/SLC17A7/GRIN3A/GPM6B/CRH/ADRA1A/SNCAIP/HTR2C/SLC6A11/GABRA2	11
BP	GO:0050890	cognition	12/123	110/5658	3.7704e-06	0.000557516	0.000506953	SLC6A1/C1QL1/ADCY8/SLC17A7/CRH/KCNAB1/JUN/SORCS3/NRGN/SLC1A4/TAC1/KCNK2	12
BP	GO:0007611	learning or memory	11/123	95/5658	5.45124e-06	0.000711227	0.000646723	SLC6A1/C1QL1/ADCY8/SLC17A7/CRH/KCNAB1/JUN/SORCS3/NRGN/TAC1/KCNK2	11
BP	GO:0050808	synapse organization	14/123	158/5658	6.82734e-06	0.000841281	0.000764982	KIRREL3/DNER/ERBB4/NRG1/C1QL1/PCDH17/SHISA6/NFIA/NTN1/BCAN/CLSTN2/GABRA2/COL4A5/IL1RAPL2	14
MF	GO:0022857	transmembrane transporter activity	18/118	319/5628	9.80707e-05	0.00105031	0.000842509	KCNIP4/KCNC2/SLC6A1/SLC17A7/GRIN3A/KCNAB1/KCNQ5/KCNQ1/GRIK3/GRIK1/GRID1/SLC1A4/SLCO3A1/GRIN2D/KCNK2/SLC6A11/GABRA2/RYR3	18
BP	GO:0042391	regulation of membrane potential	13/123	144/5658	1.21361e-05	0.00141673	0.00128824	KCNC2/SLC17A7/GRIN3A/JUN/ADRA1A/KCNQ1/GRIK3/GRIK1/GRID1/TAC1/GRIN2D/KCNK2/GABRA2	13
MF	GO:0004888	transmembrane signaling receptor activity	19/118	367/5628	0.000193334	0.00200584	0.001609	SORCS1/DNER/ERBB4/UNC5C/GRM7/GRIN3A/PTPRT/ADRA1A/SORCS3/GRIK3/GRIK1/GRID1/DCC/UNC5B/HTR2C/GRIN2D/RAMP1/GABRA2/IL1RAPL2	19
CC	GO:0098796	membrane protein complex	20/127	401/5894	0.00031995	0.00200899	0.0015273	KCNIP4/KCNC2/DPP6/NPNT/GRIN3A/KCNAB1/KCNQ5/SHISA6/GNAO1/KCNQ1/CDH4/GRIK3/GRIK1/DUOX1/GRIN2D/RAMP1/KCNK2/GABRA2/RYR3/HLA-A	20
MF	GO:0005215	transporter activity	18/118	348/5628	0.000293816	0.00295596	0.00237114	KCNIP4/KCNC2/SLC6A1/SLC17A7/GRIN3A/KCNAB1/KCNQ5/KCNQ1/GRIK3/GRIK1/GRID1/SLC1A4/SLCO3A1/GRIN2D/KCNK2/SLC6A11/GABRA2/RYR3	18
CC	GO:0044463	cell projection part	22/127	482/5894	0.000541256	0.00317694	0.00241521	CAMK2N1/KIRREL3/KCNC2/DNER/UNC5C/ADCY8/GRM7/TTLL7/CRH/KCNAB1/SHISA6/GNAO1/GRIK3/NRGN/SLC1A4/MT3/HTR2C/HHIP/BRINP3/KCNK2/FEZ1/GABRA2	22
CC	GO:0120038	plasma membrane bounded cell projection part	22/127	482/5894	0.000541256	0.00317694	0.00241521	CAMK2N1/KIRREL3/KCNC2/DNER/UNC5C/ADCY8/GRM7/TTLL7/CRH/KCNAB1/SHISA6/GNAO1/GRIK3/NRGN/SLC1A4/MT3/HTR2C/HHIP/BRINP3/KCNK2/FEZ1/GABRA2	22
BP	GO:0030900	forebrain development	14/123	182/5658	3.44627e-05	0.00363992	0.00330981	KIRREL3/KCNC2/ERBB4/ZEB2/NRG1/SLIT2/PRKG1/CRH/RFX4/GNAO1/NRGN/BCAN/FEZ1/DLX1	14
BP	GO:0006812	cation transport	22/123	407/5658	5.1748e-05	0.0049903	0.00453772	KCNIP4/KCNC2/CEMIP/DPP6/NKAIN2/SLC17A7/GRIN3A/GPM6B/CRH/KCNAB1/KCNQ5/SHISA6/GNAO1/ADRA1A/KCNQ1/SLC1A4/MT3/HTR2C/GRIN2D/RAMP1/KCNK2/RYR3	22
BP	GO:0030001	metal ion transport	19/123	336/5658	9.91087e-05	0.00879292	0.00799546	KCNIP4/KCNC2/CEMIP/DPP6/NKAIN2/SLC17A7/GRIN3A/CRH/KCNAB1/KCNQ5/GNAO1/ADRA1A/KCNQ1/MT3/HTR2C/GRIN2D/RAMP1/KCNK2/RYR3	19
BP	GO:0048666	neuron development	22/123	453/5658	0.000250913	0.0180125	0.0163789	KIRREL3/ZEB2/CSMD3/UNC5C/SLIT2/C1QL1/DSCAML1/SEMA6D/GRIN3A/DGKG/PRKG1/GPM6B/PLP1/GNAO1/JUN/CDH4/PRKD1/DCC/NTN1/MT3/UNC5B/FEZ1	22
BP	GO:0021537	telencephalon development	10/123	120/5658	0.000251837	0.0180125	0.0163789	KIRREL3/ERBB4/ZEB2/NRG1/SLIT2/RFX4/NRGN/BCAN/FEZ1/DLX1	10
BP	GO:0034220	ion transmembrane transport	20/123	392/5658	0.000260617	0.0180125	0.0163789	KCNIP4/KCNC2/CEMIP/DPP6/SLC17A7/GRIN3A/CRH/KCNAB1/KCNQ5/SHISA6/KCNQ1/GRIK3/GRIK1/GRID1/SLC1A4/HTR2C/GRIN2D/KCNK2/GABRA2/RYR3	20
BP	GO:0098655	cation transmembrane transport	16/123	275/5658	0.000267995	0.0180125	0.0163789	KCNIP4/KCNC2/CEMIP/DPP6/SLC17A7/GRIN3A/CRH/KCNAB1/KCNQ5/SHISA6/KCNQ1/SLC1A4/HTR2C/GRIN2D/KCNK2/RYR3	16
BP	GO:0031175	neuron projection development	20/123	399/5658	0.00032954	0.0203033	0.018462	KIRREL3/ZEB2/CSMD3/UNC5C/SLIT2/DSCAML1/SEMA6D/GRIN3A/PRKG1/GPM6B/PLP1/GNAO1/JUN/CDH4/PRKD1/DCC/NTN1/MT3/UNC5B/FEZ1	20
MF	GO:0060089	molecular transducer activity	20/118	486/5628	0.00242892	0.0217946	0.0174827	SORCS1/DNER/ERBB4/UNC5C/GRM7/GRIN3A/PRKG1/PTPRT/ADRA1A/SORCS3/GRIK3/GRIK1/GRID1/DCC/UNC5B/HTR2C/GRIN2D/RAMP1/GABRA2/IL1RAPL2	20
BP	GO:1901135	carbohydrate derivative metabolic process	20/123	407/5658	0.000427465	0.0231248	0.0210276	CEMIP/HS6ST3/ST8SIA4/XYLT1/HSPA1A/ADCY8/HPSE2/TET2/FUT9/PDE8A/SPOCK3/SCD5/GPC5/HS3ST4/MT3/HSPA1B/AATF/BCAN/RAMP1/PTHLH	20
BP	GO:0007186	G protein-coupled receptor signaling pathway	18/123	347/5658	0.000448392	0.0236794	0.0215318	SORCS1/VAV3/ADCY8/GRM7/PDE8A/DGKG/CRH/GNAO1/ADRA1A/SORCS3/GRIK3/TAC1/HTR2C/RAMP1/FRMPD1/KCNK2/GABRA2/PTHLH	18
MF	GO:0038023	signaling receptor activity	19/118	466/5628	0.0034906	0.0275924	0.0221334	SORCS1/DNER/ERBB4/UNC5C/GRM7/GRIN3A/PTPRT/ADRA1A/SORCS3/GRIK3/GRIK1/GRID1/DCC/UNC5B/HTR2C/GRIN2D/RAMP1/GABRA2/IL1RAPL2	19
BP	GO:0061564	axon development	13/123	211/5658	0.000608428	0.029466	0.0267936	ZEB2/UNC5C/SLIT2/DSCAML1/SEMA6D/PLP1/JUN/CDH4/DCC/NTN1/MT3/UNC5B/FEZ1	13
BP	GO:0098660	inorganic ion transmembrane transport	15/123	272/5658	0.00074222	0.0316585	0.0287873	KCNIP4/KCNC2/CEMIP/DPP6/SLC17A7/GRIN3A/KCNAB1/KCNQ5/KCNQ1/SLC1A4/HTR2C/GRIN2D/KCNK2/GABRA2/RYR3	15
MF	GO:0005509	calcium ion binding	13/118	276/5628	0.00486219	0.0350923	0.0281495	KCNIP4/DNER/SLIT2/NPNT/SPOCK3/DGKG/ASTN2/PCDH17/CDH4/DUOX1/NELL1/CLSTN2/RYR3	13
CC	GO:0043235	receptor complex	10/127	196/5894	0.00937152	0.0468576	0.0356227	ERBB4/NPNT/GRM7/GRIN3A/SHISA6/GRIK3/GRIK1/GRIN2D/RAMP1/GABRA2	10
BP	GO:0051960	regulation of nervous system development	19/123	410/5658	0.00123109	0.047693	0.0433676	ERBB4/ZEB2/CSMD3/NRG1/SLIT2/SEMA6D/RFX4/CDH4/PRKD1/DCC/NTN1/BHLHE41/MT3/BRINP3/CLSTN2/MMD2/FEZ1/DLX1/IL1RAPL2	19
BP	GO:0009101	glycoprotein biosynthetic process	10/123	152/5658	0.00162017	0.0538277	0.0489459	HS6ST3/ST8SIA4/XYLT1/TET2/FUT9/HS3ST4/MT3/AATF/BCAN/RAMP1	10
BP	GO:0043269	regulation of ion transport	14/123	264/5658	0.00163541	0.0538277	0.0489459	KCNIP4/KCNC2/CEMIP/DPP6/SLC6A1/NKAIN2/GRM7/GPM6B/CRH/KCNAB1/KCNQ5/SHISA6/GNAO1/KCNQ1	14
BP	GO:0042493	response to drug	19/123	420/5658	0.00163559	0.0538277	0.0489459	GAD2/KCNC2/VAV3/SLC6A1/SLIT2/ADCY8/PDE8A/SLC17A7/GRIN3A/CRH/GNAO1/JUN/ADRA1A/KCNQ1/TAC1/MT3/HTR2C/SLC6A11/RYR3	19
BP	GO:0009100	glycoprotein metabolic process	11/123	183/5658	0.00197281	0.0607734	0.0552616	HS6ST3/ST8SIA4/XYLT1/TET2/FUT9/SPOCK3/HS3ST4/MT3/AATF/BCAN/RAMP1	11
BP	GO:0098662	inorganic cation transmembrane transport	13/123	243/5658	0.00222636	0.0643524	0.0585161	KCNIP4/KCNC2/CEMIP/DPP6/SLC17A7/GRIN3A/KCNAB1/KCNQ5/KCNQ1/HTR2C/GRIN2D/KCNK2/RYR3	13
BP	GO:1901137	carbohydrate derivative biosynthetic process	14/123	275/5658	0.00239893	0.0643524	0.0585161	CEMIP/HS6ST3/ST8SIA4/XYLT1/ADCY8/TET2/FUT9/SCD5/GPC5/HS3ST4/MT3/AATF/BCAN/RAMP1	14
BP	GO:0007409	axonogenesis	11/123	191/5658	0.00276386	0.0704626	0.0640721	ZEB2/UNC5C/SLIT2/DSCAML1/SEMA6D/CDH4/DCC/NTN1/MT3/UNC5B/FEZ1	11
BP	GO:0019932	second-messenger-mediated signaling	10/123	168/5658	0.00338943	0.0827865	0.0752783	KCNC2/NRG1/ADCY8/PRKG1/CRH/ADRA1A/HTR2C/GRIN2D/RAMP1/PTHLH	10

## Sheet: L2_3
ONTOLOGY	ID	Description	GeneRatio	BgRatio	pvalue	p.adjust	qvalue	geneID	Count
CC	GO:0045202	synapse	179/1131	434/5894	1.52113e-28	7.08847e-26	4.99571e-26	CCK/CAMK2N1/SLC17A7/GPM6A/PRNP/NRXN1/RPL8/NPTXR/NLGN1/HSPA8/SV2C/NRG3/GABRB1/KCND2/ERBB4/GRM7/GRID2/CNTN5/ZNF804A/SYT1/TSC2/CADM1/PTPRD/GPC6/LRRTM4/CNR1/SORCS3/NLGN4Y/GRIA4/PKP4/NRGN/RGS12/SPARCL1/DNM2/KCNC2/FUS/TUBA1A/HIP1/RPS9/DCC/CHRM3/AKAP12/RPL38/GAK/NRG1/APBB2/RABAC1/CACNB2/GRID1/RPLP2/SDK1/RPS18/GABRA2/DSCAML1/IL1RAPL1/GRIK1/GRIP1/MT3/PCDH15/CDH10/SLC4A7/CDH9/ACTB/DNAJC6/LRRC4C/RPS23/ATP2B…	179
BP	GO:0045047	protein targeting to ER	53/1100	65/5658	2.53991e-27	3.55224e-24	3.2514e-24	RPS15/RPL8/RPL13/RPS27A/RPL37A/SRP14/RPL37/RPL18/RPS6/RPL31/RPS9/RPS24/RPL38/RPLP2/RPS18/RPS23/RPS29/RPL28/RPL35/RPS4X/RPL24/RPL32/RPS25/RPS28/RPS4Y1/RPL29/RPS19/RPL11/RPLP1/RPL41/RPS12/RPL27A/RPL36/RPS8/RPS17/RPS20/RPL10/RPL19/RPSA/HSPA5/RPL30/RPL27/RPS13/RPL23A/RPS16/UBA52/RPS3/RPL23/RPS2/RPS11/SRP54/SSR3/RPL12	53
BP	GO:0000184	nuclear-transcribed mRNA catabolic process, nonsense-mediated decay	52/1100	63/5658	2.54155e-27	3.55224e-24	3.2514e-24	RPS15/RPL8/RPL13/RPS27A/RPL37A/RPL37/RPL18/RPS6/RPL31/RPS9/RPS24/RPL38/UPF3B/RPLP2/RPS18/UPF3A/RPS23/RPS29/RPL28/RPL35/RPS4X/RPL24/RPL32/RPS25/RPS28/RPS4Y1/RPL29/RPS19/RPL11/RPLP1/RPL41/RPS12/RPL27A/RPL36/RPS8/RPS17/RPS20/RPL10/RPL19/RPSA/RPL30/RPL27/RPS13/RPL23A/RPS16/UBA52/RPS3/RPL23/RPS2/RPS11/RPL12/EIF3E	52
BP	GO:0006614	SRP-dependent cotranslational protein targeting to membrane	52/1100	63/5658	2.54155e-27	3.55224e-24	3.2514e-24	RPS15/RPL8/RPL13/RPS27A/RPL37A/SRP14/RPL37/RPL18/RPS6/RPL31/RPS9/RPS24/RPL38/RPLP2/RPS18/RPS23/RPS29/RPL28/RPL35/RPS4X/RPL24/RPL32/RPS25/RPS28/RPS4Y1/RPL29/RPS19/RPL11/RPLP1/RPL41/RPS12/RPL27A/RPL36/RPS8/RPS17/RPS20/RPL10/RPL19/RPSA/RPL30/RPL27/RPS13/RPL23A/RPS16/UBA52/RPS3/RPL23/RPS2/RPS11/SRP54/SSR3/RPL12	52
CC	GO:0022626	cytosolic ribosome	52/1131	65/5894	2.43009e-26	5.6621e-24	3.99046e-24	RPS15/RPL8/RPL13/RPS27A/RPL37A/RPL37/RPL18/RPS6/RPL31/RPS9/RPS24/RPL38/RPLP2/RPS18/RPS23/RPS29/RPL28/RPL35/RPS4X/RPL24/RPL32/RPS25/RPS28/RPS4Y1/RPL29/RPS19/RPL11/RPLP1/RPL41/RPS12/RPL27A/RPL36/RPS8/RPS17/RPS20/RPL10/RPL19/RPSA/RPL30/RPL27/RPS13/RPL23A/RPS16/UBA52/RPS3/RPL23/RPS2/RPS11/APOD/RPL36AL/RPL12/PPARGC1A	52
BP	GO:0072599	establishment of protein localization to endoplasmic reticulum	53/1100	66/5658	1.05281e-26	9.28018e-24	8.49424e-24	RPS15/RPL8/RPL13/RPS27A/RPL37A/SRP14/RPL37/RPL18/RPS6/RPL31/RPS9/RPS24/RPL38/RPLP2/RPS18/RPS23/RPS29/RPL28/RPL35/RPS4X/RPL24/RPL32/RPS25/RPS28/RPS4Y1/RPL29/RPS19/RPL11/RPLP1/RPL41/RPS12/RPL27A/RPL36/RPS8/RPS17/RPS20/RPL10/RPL19/RPSA/HSPA5/RPL30/RPL27/RPS13/RPL23A/RPS16/UBA52/RPS3/RPL23/RPS2/RPS11/SRP54/SSR3/RPL12	53
BP	GO:0006613	cotranslational protein targeting to membrane	52/1100	64/5658	1.10663e-26	9.28018e-24	8.49424e-24	RPS15/RPL8/RPL13/RPS27A/RPL37A/SRP14/RPL37/RPL18/RPS6/RPL31/RPS9/RPS24/RPL38/RPLP2/RPS18/RPS23/RPS29/RPL28/RPL35/RPS4X/RPL24/RPL32/RPS25/RPS28/RPS4Y1/RPL29/RPS19/RPL11/RPLP1/RPL41/RPS12/RPL27A/RPL36/RPS8/RPS17/RPS20/RPL10/RPL19/RPSA/RPL30/RPL27/RPS13/RPL23A/RPS16/UBA52/RPS3/RPL23/RPS2/RPS11/SRP54/SSR3/RPL12	52
MF	GO:0003735	structural constituent of ribosome	50/1089	63/5628	6.50376e-25	3.85673e-22	3.46411e-22	RPS15/RPL8/RPL13/RPS27A/RPL37A/RPL37/RPL18/RPS6/RPL31/RPS9/RPS24/RPL38/RPLP2/RPS18/RPS23/RPS29/RPL28/RPL35/RPS4X/RPL24/RPL32/RPS25/RPS28/RPS4Y1/RPL29/RPS19/RPL11/RPLP1/RPL41/RPS12/RPL27A/RPL36/RPS8/RPS17/RPS20/RPL10/RPL19/RPSA/RPL30/RPL27/RPS13/RPL23A/RPS16/UBA52/RPS3/RPL23/RPS2/RPS11/RPL36AL/RPL12	50
BP	GO:0070972	protein localization to endoplasmic reticulum	55/1100	74/5658	1.14237e-24	7.98329e-22	7.30719e-22	RPS15/RPL8/RPL13/RPS27A/RPL37A/SRP14/RPL37/RPL18/RPS6/RPL31/RPS9/RPS24/RPL38/RPLP2/RPS18/RPS23/RPS29/RPL28/RPL35/RPS4X/RPL24/RPL32/RPS25/RPS28/RPS4Y1/RPL29/RPS19/RPL11/RPLP1/RPL41/RPS12/OS9/RPL27A/RPL36/RPS8/RPS17/RPS20/RPL10/LRRK2/RPL19/RPSA/HSPA5/RPL30/RPL27/RPS13/RPL23A/RPS16/UBA52/RPS3/RPL23/RPS2/RPS11/SRP54/SSR3/RPL12	55
CC	GO:0044391	ribosomal subunit	50/1131	65/5894	6.00036e-24	9.32056e-22	6.56882e-22	RPS15/RPL8/RPL13/RPS27A/RPL37A/RPL37/RPL18/RPS6/RPL31/RPS9/RPS24/RPL38/RPLP2/RPS18/RPS23/RPS29/RPL28/RPL35/RPS4X/RPL24/RPL32/RPS25/RPS28/RPS4Y1/RPL29/RPS19/RPL11/RPLP1/RPL41/RPS12/RPL27A/RPL36/RPS8/RPS17/RPS20/RPL10/RPL19/RPSA/RPL30/RPL27/RPS13/RPL23A/RPS16/UBA52/RPS3/RPL23/RPS2/RPS11/RPL36AL/RPL12	50
CC	GO:0005840	ribosome	56/1131	79/5894	1.13529e-23	1.32261e-21	9.32134e-22	RPS15/RPL8/RPL13/RPS27A/RPL37A/RPL37/RPL18/RPS6/RPL31/RPS9/RPS24/RPL38/RPLP2/RPS18/MT3/RPS23/SF1/RPS29/RPL28/RPL35/RPS4X/RPL24/RPL32/RPS25/RPS28/RPS4Y1/RPL29/RPS19/RPL11/RPLP1/RPL41/RPS12/RPL27A/RPL36/RPS8/RPS17/RPS20/RPL10/RPL19/RPSA/RPL30/RPL27/RPS13/RPL23A/RPS16/UBA52/CANX/RPS3/RPL23/RPS2/RPS11/BTF3/APOD/RPL36AL/RPL12/PPARGC1A	56
CC	GO:0098794	postsynapse	104/1131	215/5894	5.26379e-23	4.90585e-21	3.45748e-21	CAMK2N1/SLC17A7/GPM6A/PRNP/RPL8/NLGN1/HSPA8/GABRB1/KCND2/ERBB4/GRM7/GRID2/ZNF804A/TSC2/LRRTM4/SORCS3/NLGN4Y/GRIA4/PKP4/NRGN/DNM2/KCNC2/FUS/HIP1/DCC/CHRM3/RPL38/GRID1/RPS18/GABRA2/IL1RAPL1/GRIK1/GRIP1/MT3/CDH10/CDH9/ACTB/DNAJC6/LRRC4C/DNM3/PCDH17/KCTD8/SRGAP2/NLGN4X/GRIK4/CRYAB/NSMF/RPS25/CTTNBP2/LAMA2/NRP1/OPHN1/GRIK2/GIPC1/RPS19/APC2/SRCIN1/PDE4B/SYAP1/LRRK2/GRM3/SH3GL3/CADPS2/ADD1/DLGAP1/STX4/R…	104
BP	GO:0000956	nuclear-transcribed mRNA catabolic process	60/1100	91/5658	2.10083e-22	1.22277e-19	1.11922e-19	RPS15/RPL8/RPL13/RPS27A/RPL37A/RPL37/RPL18/RPS6/RPL31/RPS9/DDX5/LSM7/RPS24/RPL38/UPF3B/RPLP2/RPS18/UPF3A/RPS23/RPS29/RPL28/RPL35/RPS4X/RPL24/RPL32/RPS25/RPS28/RPS4Y1/RPL29/RPS19/RPL11/RPLP1/RPL41/RPS12/RPL27A/RPL36/RPS8/RPS17/RPS20/RPL10/ZFP36L1/RPL19/ATM/RPSA/RPL30/LSM2/RPL27/RPS13/RPL23A/RPS16/UBA52/RPS3/RPL23/DXO/RPS2/RPS11/CNOT2/CNOT1/RPL12/EIF3E	60
BP	GO:0006605	protein targeting	82/1100	150/5658	2.33298e-22	1.22277e-19	1.11922e-19	RPS15/PRNP/RPL8/RPL13/NLGN1/HSPA8/RPS27A/RPL37A/SRP14/RPL37/RPL18/RPS6/UBB/RPL31/RPS9/AKAP12/RPS24/RPL38/RPLP2/RPS18/HSP90AA1/RPS23/RPS29/RPL28/RPL35/RPS4X/RPL24/RPL32/CLU/MICALL2/SREBF2/ARIH2/RPS25/RPS28/UBC/RPS4Y1/GIPC1/RPL29/RPS19/RPL11/RPLP1/RPL41/RPS12/PEX5L/ZFYVE16/PEX16/OS9/RPL27A/RPL36/RPS8/RPS17/RPS20/RPL10/LRRK2/TIMM23B/SORL1/RPL19/UBL5/STXBP4/RPSA/HSPA5/RPL30/RPL27/RPS13/RPL23A/RPS16/U…	82
BP	GO:0016071	mRNA metabolic process	136/1100	328/5658	2.2119e-21	1.0305e-18	9.43228e-19	RPS15/HSPB1/CIRBP/SNRNP70/CELF2/RPL8/KHDRBS3/RPL13/HSPA8/HSPA1A/MBNL1/RPS27A/RPL37A/SON/RPL37/CLASRP/RPL18/RPS6/UBB/SRRM2/RPL31/FUS/PRKCA/RPS9/DDX5/LSM7/RPS24/RPL38/HSPA1B/PCBP1/UPF3B/RPLP2/RPS18/SRSF2/SRRM1/BCAS2/NOVA1/PSME4/UPF3A/RPS23/SF1/RPS29/RPL28/RPL35/RPS4X/RPL24/RPL32/RNH1/HNRNPM/SAFB2/PRPF4B/POLR2L/RPS25/RPS28/ATF4/HNRNPK/UBC/RPS4Y1/DDX39A/RPL29/RPS19/RPL11/RPLP1/HNRNPU/HNRNPA2B1/RPL41/…	136
BP	GO:0006413	translational initiation	56/1100	85/5658	5.8802e-21	2.46557e-18	2.25676e-18	RPS15/HSPB1/RPL8/EIF1/RPL13/RPS27A/RPL37A/RPL37/RPL18/RPS6/RPL31/RPS9/RPS24/RPL38/RPLP2/RPS18/RPS23/RPS29/RPL28/RPL35/RPS4X/RPL24/RPL32/RPS25/RPS28/ATF4/RPS4Y1/EIF2S2/RPL29/RPS19/RPL11/RPLP1/RPL41/RPS12/RPL27A/RPL36/RPS8/RPS17/RPS20/RPL10/EIF3G/RPS6KB2/RPL19/RPSA/RPL30/RPL27/RPS13/RPL23A/RPS16/UBA52/RPS3/RPL23/RPS2/RPS11/RPL12/EIF3E	56
BP	GO:0006612	protein targeting to membrane	58/1100	93/5658	6.46274e-20	2.46348e-17	2.25485e-17	RPS15/PRNP/RPL8/RPL13/RPS27A/RPL37A/SRP14/RPL37/RPL18/RPS6/RPL31/RPS9/RPS24/RPL38/RPLP2/RPS18/RPS23/RPS29/RPL28/RPL35/RPS4X/RPL24/RPL32/RPS25/RPS28/RPS4Y1/RPL29/RPS19/RPL11/RPLP1/RPL41/RPS12/PEX16/RPL27A/RPL36/RPS8/RPS17/RPS20/RPL10/RPL19/RPSA/HSPA5/RPL30/RPL27/RPS13/RPL23A/RPS16/UBA52/CIB1/RPS3/SDCBP/RPL23/RPS2/RPS11/SRP54/SSR3/AKT2/RPL12	58
CC	GO:0098984	neuron to neuron synapse	66/1131	118/5894	3.40284e-19	2.64287e-17	1.86261e-17	CAMK2N1/PRNP/RPL8/NLGN1/KCND2/ERBB4/GRM7/GRID2/SYT1/TSC2/SORCS3/NLGN4Y/PKP4/NRGN/DNM2/DCC/CHRM3/RPL38/GRID1/RPS18/MT3/DNAJC6/LRRC4C/DNM3/SRGAP2/NLGN4X/GRIK4/CRYAB/NSMF/RPS25/GRIK2/RPS19/SRCIN1/PDE4B/GRM3/SH3GL3/ADD1/DLGAP1/RPL30/MINK1/CLSTN2/ADCY8/PSD3/HNRNPA3/ADD3/HIP1R/DAB1/RPS13/ABI1/CTNNB1/SYT11/RPS3/RPL23/MAP4/TNIK/SLC6A9/SYNDIG1/DNAJB1/SPOCK1/STAT3/ADAM10/SORCS2/GRIN3A/RPL12/PCBP2/PENK	66
CC	GO:0044456	synapse part	129/1131	324/5894	5.93588e-19	3.9516e-17	2.78496e-17	CCK/CAMK2N1/SLC17A7/GPM6A/PRNP/NRXN1/RPL8/NLGN1/HSPA8/SV2C/GABRB1/KCND2/ERBB4/GRM7/GRID2/CNTN5/ZNF804A/SYT1/TSC2/LRRTM4/CNR1/SORCS3/NLGN4Y/GRIA4/PKP4/NRGN/DNM2/KCNC2/FUS/HIP1/DCC/CHRM3/RPL38/GAK/RABAC1/CACNB2/GRID1/RPS18/GABRA2/IL1RAPL1/GRIK1/GRIP1/MT3/CDH10/CDH9/ACTB/DNAJC6/LRRC4C/ATP2B4/DNM3/PCDH17/KCTD8/SRGAP2/NLGN4X/GRIK4/CRYAB/GRM8/NSMF/RPS25/CTTNBP2/LAMA2/NRP1/OPHN1/GRIK2/GIPC1/RPS19/APC2/S…	129
CC	GO:0032279	asymmetric synapse	63/1131	111/5894	8.15657e-19	4.7512e-17	3.34849e-17	CAMK2N1/PRNP/RPL8/NLGN1/KCND2/ERBB4/GRM7/GRID2/TSC2/SORCS3/NLGN4Y/PKP4/NRGN/DNM2/DCC/CHRM3/RPL38/GRID1/RPS18/MT3/DNAJC6/LRRC4C/DNM3/SRGAP2/NLGN4X/CRYAB/NSMF/RPS25/GRIK2/RPS19/SRCIN1/PDE4B/GRM3/SH3GL3/ADD1/DLGAP1/RPL30/MINK1/CLSTN2/ADCY8/PSD3/HNRNPA3/ADD3/HIP1R/DAB1/RPS13/ABI1/CTNNB1/SYT11/RPS3/RPL23/MAP4/TNIK/SLC6A9/SYNDIG1/DNAJB1/SPOCK1/STAT3/ADAM10/SORCS2/GRIN3A/RPL12/PCBP2	63
CC	GO:0014069	postsynaptic density	62/1131	109/5894	1.3395e-18	6.93565e-17	4.88801e-17	CAMK2N1/PRNP/RPL8/NLGN1/KCND2/ERBB4/GRID2/TSC2/SORCS3/NLGN4Y/PKP4/NRGN/DNM2/DCC/CHRM3/RPL38/GRID1/RPS18/MT3/DNAJC6/LRRC4C/DNM3/SRGAP2/NLGN4X/CRYAB/NSMF/RPS25/GRIK2/RPS19/SRCIN1/PDE4B/GRM3/SH3GL3/ADD1/DLGAP1/RPL30/MINK1/CLSTN2/ADCY8/PSD3/HNRNPA3/ADD3/HIP1R/DAB1/RPS13/ABI1/CTNNB1/SYT11/RPS3/RPL23/MAP4/TNIK/SLC6A9/SYNDIG1/DNAJB1/SPOCK1/STAT3/ADAM10/SORCS2/GRIN3A/RPL12/PCBP2	62
CC	GO:0098978	glutamatergic synapse	66/1131	121/5894	2.05154e-18	8.9482e-17	6.30639e-17	GPM6A/NRXN1/NPTXR/NLGN1/NRG3/KCND2/ERBB4/GRID2/SYT1/PTPRD/GPC6/CNR1/SORCS3/NLGN4Y/NRGN/SPARCL1/DNM2/HIP1/CHRM3/NRG1/GRID1/IL1RAPL1/GRIP1/CDH10/ACTB/LRRC4C/ATP2B4/DNM3/IL1RAPL2/PCDH17/CBLN2/ARHGAP22/NLGN4X/CTTNBP2/NRP1/OPHN1/GRIK2/GIPC1/EPHB1/LRRK2/NTNG1/GRM3/SH3GL3/CADPS2/APOE/SLC1A2/CTBP2/PFN1/STX4/CLSTN2/ADCY8/CANX/EPS15/TNIK/TNR/DNAJB1/CSPG5/DGKB/YWHAE/PLCG1/STAT3/SPARC/ADAM10/IL1RAP/GRIN3A/BC…	66
CC	GO:0043005	neuron projection	161/1131	447/5894	2.11224e-18	8.9482e-17	6.30639e-17	CCK/CAMK2N1/CNTNAP2/SLC17A7/HSPB1/BRINP3/GPM6A/PRNP/TUBB4A/NPTXR/NLGN1/ROBO2/HSPA8/CKB/CNTN4/SV2C/GABRB1/KCND2/STMN1/GRM7/GRID2/ZNF804A/PCDH9/SYT1/EPHA6/TENM3/CNR1/KIRREL3/RPS6/UBB/GRIA4/NCAM2/GNAS/NRGN/RGS12/DNM2/DOCK4/KCNC2/ACAP3/NAV1/FUS/NFIB/DCC/CHRM3/PTPRK/SNCG/NRG1/APBB2/CAMK2D/GNAO1/GABRA2/KCNAB1/MYO1D/DSCAML1/IL1RAPL1/UBXN1/GRIP1/MT3/PAM/PCDH15/SLC4A7/ACTB/HSP90AA1/ALCAM/LRP1/ATP2B4/RPL28…	161
CC	GO:0099572	postsynaptic specialization	63/1131	116/5894	1.67744e-17	6.51408e-16	4.5909e-16	CAMK2N1/PRNP/RPL8/NLGN1/KCND2/ERBB4/GRID2/TSC2/SORCS3/NLGN4Y/PKP4/NRGN/DNM2/DCC/CHRM3/RPL38/GRID1/RPS18/MT3/CDH10/DNAJC6/LRRC4C/DNM3/SRGAP2/NLGN4X/CRYAB/NSMF/RPS25/GRIK2/RPS19/SRCIN1/PDE4B/GRM3/SH3GL3/ADD1/DLGAP1/RPL30/MINK1/CLSTN2/ADCY8/PSD3/HNRNPA3/ADD3/HIP1R/DAB1/RPS13/ABI1/CTNNB1/SYT11/RPS3/RPL23/MAP4/TNIK/SLC6A9/SYNDIG1/DNAJB1/SPOCK1/STAT3/ADAM10/SORCS2/GRIN3A/RPL12/PCBP2	63
BP	GO:0006402	mRNA catabolic process	74/1100	146/5658	9.11908e-18	3.18636e-15	2.91651e-15	RPS15/HSPB1/CIRBP/RPL8/RPL13/HSPA8/HSPA1A/RPS27A/RPL37A/RPL37/RPL18/RPS6/UBB/RPL31/PRKCA/RPS9/DDX5/LSM7/RPS24/RPL38/HSPA1B/UPF3B/RPLP2/RPS18/PSME4/UPF3A/RPS23/RPS29/RPL28/RPL35/RPS4X/RPL24/RPL32/RNH1/HNRNPM/RPS25/RPS28/UBC/RPS4Y1/RPL29/RPS19/RPL11/RPLP1/HNRNPU/RPL41/RPS12/RPL27A/RPL36/RPS8/RPS17/RPS20/RPL10/ZFP36L1/RPL19/ATM/RPSA/RPL30/LSM2/RPL27/RPS13/RPL23A/RPS16/ANP32A/UBA52/RPS3/RPL23/DXO/RPS…	74
BP	GO:0019080	viral gene expression	58/1100	102/5658	3.36287e-17	1.08465e-14	9.92794e-15	RPS15/RPL8/RPL13/RPS27A/RPL37A/RPL37/RPL18/RPS6/RPL31/RPS9/RPS24/RPL38/RPLP2/RPS18/RPS23/RPS29/RPL28/RPL35/RPS4X/RPL24/RPL32/POLR2L/RPS25/RPS28/RPS4Y1/RPL29/RPS19/RPL11/RPLP1/RPL41/RPS12/RPL27A/RPL36/RPS8/RPS17/RPS20/RPL10/CHD1/EIF3G/RPL19/POLR2F/RPSA/RPL30/NELFE/RPL27/PTBP1/RPS13/RPL23A/RPS16/UBA52/RPS3/POLR2J/RPL23/RPS2/RPS11/POLR2I/RPL12/PCBP2	58
CC	GO:0036477	somatodendritic compartment	113/1131	289/5894	5.42497e-16	1.94464e-14	1.37052e-14	CCK/CAMK2N1/CNTNAP2/BRINP3/GPM6A/PRNP/TUBB4A/NRXN1/NPTXR/NLGN1/HSPA8/CKB/GABRB1/KCND2/GRM7/GRID2/ZNF804A/KIRREL3/RPS6/UBB/GRIA4/GNAS/NRGN/RGS12/DNM2/KCNC2/FUS/CHRM3/AKAP12/PTPRK/SNCG/GNAO1/GABRA2/KCNAB1/MYO1D/IL1RAPL1/UBXN1/MT3/PAM/ASTN2/HSP90AA1/ALCAM/LRP1/RPL28/DNM3/ELOVL5/PDE1A/SRGAP2/NLGN4X/CLU/CRYAB/NSMF/BMPR1B/UNC5C/CTTNBP2/ATF4/LAMA2/SPG11/NRP1/OPHN1/SST/GRIK2/COBL/GIPC1/HNRNPU/TGFB1/SRCIN…	113
CC	GO:0030424	axon	92/1131	216/5894	6.7004e-16	2.23028e-14	1.57182e-14	CCK/CNTNAP2/SLC17A7/HSPB1/GPM6A/TUBB4A/NPTXR/ROBO2/HSPA8/CNTN4/GRM7/ZNF804A/PCDH9/SYT1/TENM3/CNR1/KIRREL3/NCAM2/NRGN/DNM2/KCNC2/ACAP3/NAV1/NFIB/DCC/CHRM3/PTPRK/SNCG/NRG1/APBB2/KCNAB1/MYO1D/DSCAML1/IL1RAPL1/MT3/ACTB/HSP90AA1/ALCAM/LRP1/DNM3/STMN4/CRYAB/UNC5C/SPG11/NRP1/OPHN1/GRIK2/COBL/TGFB1/SRCIN1/SIRT2/ROGDI/SYAP1/PALLD/EPHB1/IQGAP1/KLHL24/LRRK2/GRM3/SLC1A2/DSCAM/UNC13C/MINK1/ADCY8/PSEN1/SCN1A/A…	92
CC	GO:0097060	synaptic membrane	71/1131	149/5894	1.46814e-15	4.56103e-14	3.21446e-14	CAMK2N1/GPM6A/NRXN1/NLGN1/GABRB1/KCND2/ERBB4/GRM7/GRID2/CNTN5/SYT1/LRRTM4/CNR1/SORCS3/NLGN4Y/GRIA4/NRGN/DNM2/KCNC2/HIP1/DCC/CHRM3/GRID1/GABRA2/IL1RAPL1/GRIK1/GRIP1/CDH10/CDH9/LRRC4C/ATP2B4/DNM3/PCDH17/KCTD8/SRGAP2/NLGN4X/GRIK4/CRYAB/GRM8/NSMF/NRP1/GRIK2/SRCIN1/ROGDI/SYAP1/NTNG1/GRM3/CADPS2/SLC1A2/DLGAP1/UNC13C/STX4/MINK1/CLSTN2/ADCY8/PSD3/PSEN1/HIP1R/ABI1/TENM2/SLC8A1/CTNNB1/SYT11/CANX/CNTNAP4/SL…	71
BP	GO:0090150	establishment of protein localization to membrane	66/1100	128/5658	1.87849e-16	5.62608e-14	5.14961e-14	RPS15/PRNP/RPL8/RPL13/RPS27A/RPL37A/SRP14/RPL37/RPL18/RPS6/RPL31/RPS9/ATP1B1/RPS24/RPL38/RPLP2/RPS18/GRIP1/HSP90AA1/RPS23/RPS29/RPL28/RPL35/RPS4X/RPL24/RPL32/RPS25/NPC1/RPS28/RPS4Y1/RPL29/RPS19/RPL11/RPLP1/RPL41/RPS12/PEX16/RAB31/RPL27A/RPL36/RPS8/RPS17/RPS20/RPL10/ARFRP1/RPL19/RPSA/HSPA5/RPL30/RPL27/RPS13/RPL23A/RPS16/UBA52/CIB1/RPS3/SDCBP/RPL23/RPS2/RPS11/ACSL3/YWHAE/SRP54/SSR3/AKT2/RPL12	66
CC	GO:0030425	dendrite	90/1131	213/5894	2.56962e-15	7.48402e-14	5.27449e-14	CCK/CAMK2N1/CNTNAP2/BRINP3/GPM6A/PRNP/NPTXR/NLGN1/HSPA8/CKB/GABRB1/KCND2/GRM7/GRID2/ZNF804A/KIRREL3/RPS6/GRIA4/GNAS/NRGN/RGS12/DNM2/KCNC2/FUS/CHRM3/PTPRK/GNAO1/GABRA2/KCNAB1/MYO1D/IL1RAPL1/UBXN1/MT3/HSP90AA1/ALCAM/LRP1/RPL28/DNM3/ELOVL5/SRGAP2/NLGN4X/CLU/CRYAB/NSMF/BMPR1B/UNC5C/CTTNBP2/ATF4/LAMA2/SPG11/OPHN1/GRIK2/COBL/GIPC1/HNRNPU/SRCIN1/PDE4B/ROGDI/SYAP1/EPHB1/LRRK2/GRM3/APOE/DSCAM/STX4/MINK1/A…	90
BP	GO:0019083	viral transcription	55/1100	97/5658	2.70082e-16	7.54968e-14	6.9103e-14	RPS15/RPL8/RPL13/RPS27A/RPL37A/RPL37/RPL18/RPS6/RPL31/RPS9/RPS24/RPL38/RPLP2/RPS18/RPS23/RPS29/RPL28/RPL35/RPS4X/RPL24/RPL32/POLR2L/RPS25/RPS28/RPS4Y1/RPL29/RPS19/RPL11/RPLP1/RPL41/RPS12/RPL27A/RPL36/RPS8/RPS17/RPS20/RPL10/CHD1/RPL19/POLR2F/RPSA/RPL30/NELFE/RPL27/RPS13/RPL23A/RPS16/UBA52/RPS3/POLR2J/RPL23/RPS2/RPS11/POLR2I/RPL12	55
CC	GO:0097447	dendritic tree	90/1131	214/5894	3.63498e-15	9.96412e-14	7.02238e-14	CCK/CAMK2N1/CNTNAP2/BRINP3/GPM6A/PRNP/NPTXR/NLGN1/HSPA8/CKB/GABRB1/KCND2/GRM7/GRID2/ZNF804A/KIRREL3/RPS6/GRIA4/GNAS/NRGN/RGS12/DNM2/KCNC2/FUS/CHRM3/PTPRK/GNAO1/GABRA2/KCNAB1/MYO1D/IL1RAPL1/UBXN1/MT3/HSP90AA1/ALCAM/LRP1/RPL28/DNM3/ELOVL5/SRGAP2/NLGN4X/CLU/CRYAB/NSMF/BMPR1B/UNC5C/CTTNBP2/ATF4/LAMA2/SPG11/OPHN1/GRIK2/COBL/GIPC1/HNRNPU/SRCIN1/PDE4B/ROGDI/SYAP1/EPHB1/LRRK2/GRM3/APOE/DSCAM/STX4/MINK1/A…	90
CC	GO:0044445	cytosolic part	57/1131	110/5894	9.71919e-15	2.51619e-13	1.77333e-13	RPS15/RPL8/RPL13/HSPA8/RPS27A/RPL37A/RPL37/TSC2/RPL18/RPS6/RPL31/RPS9/RPS24/RPL38/RPLP2/RPS18/RPS23/RPS29/RPL28/RPL35/RPS4X/RPL24/RPL32/RPS25/RPS28/RPS4Y1/RPL29/RPS19/RPL11/RPLP1/RPL41/RPS12/RPL27A/RPL36/RPS8/RPS17/RPS20/RPL10/LRRK2/RPL19/CTBP2/RPSA/RPL30/RPL27/RPS13/RPL23A/RPS16/UBA52/RPS3/RPL23/RPS2/RPS11/ENO1/APOD/RPL36AL/RPL12/PPARGC1A	57
CC	GO:0015934	large ribosomal subunit	27/1131	33/5894	1.13578e-14	2.64636e-13	1.86507e-13	RPL8/RPL13/RPL37A/RPL37/RPL18/RPL31/RPL38/RPLP2/RPL28/RPL35/RPL24/RPL32/RPL29/RPL11/RPLP1/RPL41/RPL27A/RPL36/RPL10/RPL19/RPL30/RPL27/RPL23A/UBA52/RPL23/RPL36AL/RPL12	27
CC	GO:0022625	cytosolic large ribosomal subunit	27/1131	33/5894	1.13578e-14	2.64636e-13	1.86507e-13	RPL8/RPL13/RPL37A/RPL37/RPL18/RPL31/RPL38/RPLP2/RPL28/RPL35/RPL24/RPL32/RPL29/RPL11/RPLP1/RPL41/RPL27A/RPL36/RPL10/RPL19/RPL30/RPL27/RPL23A/UBA52/RPL23/RPL36AL/RPL12	27
CC	GO:1990904	ribonucleoprotein complex	114/1131	304/5894	1.36487e-14	3.02872e-13	2.13454e-13	RPS15/CIRBP/MEG3/SNRNP70/CELF2/RPL8/EIF1/RPL13/HSPA8/HSPA1A/MBNL1/RPS27A/RPL37A/SRP14/RPL37/RPL18/RPS6/SRRM2/RPL31/FUS/TUBA1A/RPS9/DDX5/LSM7/RPS24/RPL38/HSPA1B/PCBP1/RPLP2/RPS18/SRSF2/SRRM1/BCAS2/MT3/ACTB/RPS23/SF1/RPS29/RPL28/RPL35/RPS4X/RPL24/RPL32/HNRNPM/PRPF4B/CPEB2/RPS25/RPS28/HNRNPK/RPS4Y1/RPL29/RPS19/RPL11/RPLP1/HNRNPU/HNRNPA2B1/RPL41/RPS12/RPL27A/RPL36/RPS8/SQSTM1/RPS17/RPS20/RPL10/IQGAP1…	114
BP	GO:0006401	RNA catabolic process	74/1100	159/5658	3.58803e-15	9.40288e-13	8.60655e-13	RPS15/HSPB1/CIRBP/RPL8/RPL13/HSPA8/HSPA1A/RPS27A/RPL37A/RPL37/RPL18/RPS6/UBB/RPL31/PRKCA/RPS9/DDX5/LSM7/RPS24/RPL38/HSPA1B/UPF3B/RPLP2/RPS18/PSME4/UPF3A/RPS23/RPS29/RPL28/RPL35/RPS4X/RPL24/RPL32/RNH1/HNRNPM/RPS25/RPS28/UBC/RPS4Y1/RPL29/RPS19/RPL11/RPLP1/HNRNPU/RPL41/RPS12/RPL27A/RPL36/RPS8/RPS17/RPS20/RPL10/ZFP36L1/RPL19/ATM/RPSA/RPL30/LSM2/RPL27/RPS13/RPL23A/RPS16/ANP32A/UBA52/RPS3/RPL23/DXO/RPS…	74
BP	GO:0072594	establishment of protein localization to organelle	81/1100	184/5658	8.74363e-15	2.15659e-12	1.97395e-12	RPS15/RPL8/RPL13/HSPA8/RPS27A/RPL37A/SRP14/RPL37/RANBP17/TSC2/RPL18/RPS6/UBB/RPL31/RPS9/RPS24/RPL38/RPLP2/RPS18/VPS28/HSP90AA1/RPS23/RPS29/RPL28/RPL35/RPS4X/RPL24/RPL32/CLU/MICALL2/SREBF2/ARIH2/RPS25/RPS28/UBC/RPS4Y1/RPL29/RPS19/RPL11/RPLP1/RPL41/RPS12/TGFB1/PEX5L/ZFYVE16/PEX16/RPL27A/RPL36/RPS8/DMAP1/RPS17/RPS20/RPL10/LRRK2/TIMM23B/SORL1/RPL19/UBL5/RPSA/HSPA5/RPL30/RPL27/PSEN1/RPS13/RPL23A/RPS16…	81
CC	GO:0044463	cell projection part	156/1131	482/5894	4.00849e-13	8.12155e-12	5.72379e-12	CCK/CAMK2N1/CNTNAP2/HSPB1/BRINP3/GPM6A/PRNP/TUBB4A/CFL1/NPTXR/NLGN1/ROBO2/HSPA8/CKB/GABRB1/KCND2/GRM7/GRID2/ZNF804A/PCDH9/SYT1/CNR1/KIRREL3/RPS6/GRIA4/GNAS/NRGN/RGS12/DNM2/KCNC2/ACAP3/NAV1/FUS/CHRM3/PTPRK/MYO6/APBB2/GNAO1/GABRA2/KCNAB1/MYO1D/EEF1A1/IL1RAPL1/UBXN1/MT3/PCDH15/ACTB/HSP90AA1/ALCAM/LRP1/ATP2B4/RPL28/DNM3/ELOVL5/SRGAP2/STMN4/NLGN4X/CLU/CRYAB/NSMF/BMPR1B/UNC5C/CTTNBP2/TTYH1/ARHGEF4/ATF4…	156
CC	GO:0120038	plasma membrane bounded cell projection part	156/1131	482/5894	4.00849e-13	8.12155e-12	5.72379e-12	CCK/CAMK2N1/CNTNAP2/HSPB1/BRINP3/GPM6A/PRNP/TUBB4A/CFL1/NPTXR/NLGN1/ROBO2/HSPA8/CKB/GABRB1/KCND2/GRM7/GRID2/ZNF804A/PCDH9/SYT1/CNR1/KIRREL3/RPS6/GRIA4/GNAS/NRGN/RGS12/DNM2/KCNC2/ACAP3/NAV1/FUS/CHRM3/PTPRK/MYO6/APBB2/GNAO1/GABRA2/KCNAB1/MYO1D/EEF1A1/IL1RAPL1/UBXN1/MT3/PCDH15/ACTB/HSP90AA1/ALCAM/LRP1/ATP2B4/RPL28/DNM3/ELOVL5/SRGAP2/STMN4/NLGN4X/CLU/CRYAB/NSMF/BMPR1B/UNC5C/CTTNBP2/TTYH1/ARHGEF4/ATF4…	156
BP	GO:0048812	neuron projection morphogenesis	100/1100	255/5658	5.45401e-14	1.27048e-11	1.16288e-11	CCK/CNTNAP2/GPM6A/NRXN1/CFL1/NLGN1/ROBO2/CNTN4/STMN1/UNC5D/SYT1/EPHA6/PTPRD/KIRREL3/UBB/MEF2A/NRXN3/ZEB2/DNM2/PRKCA/NFIB/DCC/SEMA6D/APBB2/CHN1/IRS2/DSCAML1/IL1RAPL1/SLIT2/GRIP1/MT3/ACTB/HSP90AA1/LRRC4C/S100A6/ALCAM/LRP1/DNM3/IFRD1/RPL24/SRGAP2/NSMF/BMPR1B/UNC5C/LAMA2/SPG11/NRP1/OPHN1/COBL/UST/SRCIN1/PTPRZ1/PALLD/ETV1/EPHB1/IQGAP1/LRRK2/NTNG1/KLF7/APOE/SYT17/DSCAM/PTPRM/GAB1/MINK1/PSEN1/POU3F2/DAB…	100
CC	GO:0045211	postsynaptic membrane	54/1131	110/5894	8.86802e-13	1.72187e-11	1.21352e-11	CAMK2N1/NLGN1/GABRB1/KCND2/ERBB4/GRM7/GRID2/LRRTM4/SORCS3/NLGN4Y/GRIA4/NRGN/DNM2/KCNC2/HIP1/DCC/CHRM3/GRID1/GABRA2/IL1RAPL1/GRIK1/GRIP1/CDH10/CDH9/LRRC4C/DNM3/PCDH17/KCTD8/SRGAP2/NLGN4X/GRIK4/NSMF/NRP1/GRIK2/SRCIN1/SYAP1/GRM3/CADPS2/DLGAP1/MINK1/CLSTN2/ADCY8/PSD3/ABI1/TENM2/SLC8A1/CTNNB1/CANX/SLC6A9/SYNDIG1/CSPG5/ADAM10/GRIN3A/SHC4	54
BP	GO:0032990	cell part morphogenesis	104/1100	271/5658	8.70806e-14	1.92173e-11	1.75898e-11	CCK/CNTNAP2/GPM6A/NRXN1/CFL1/NLGN1/ROBO2/CNTN4/STMN1/UNC5D/SYT1/EPHA6/PTPRD/KIRREL3/UBB/MEF2A/NRXN3/ZEB2/DNM2/PRKCA/NFIB/DCC/SEMA6D/PID1/APBB2/CHN1/IRS2/DSCAML1/IL1RAPL1/SLIT2/GRIP1/MT3/ACTB/HSP90AA1/LRRC4C/S100A6/ALCAM/LRP1/DNM3/IFRD1/RPL24/SRGAP2/NSMF/BMPR1B/UNC5C/LAMA2/SPG11/NRP1/OPHN1/COBL/UST/SRCIN1/PTPRZ1/PALLD/ETV1/EPHB1/IQGAP1/LRRK2/NTNG1/KLF7/APOE/SYT17/DSCAM/PTPRM/GAB1/MINK1/PSEN1/POU3F…	104
BP	GO:0099536	synaptic signaling	95/1100	241/5658	1.69139e-13	3.546e-11	3.24569e-11	SLC17A7/PRNP/NRXN1/NPTXR/NLGN1/HSPA8/CNTN4/SV2C/NRG3/GABRB1/KCND2/GRM7/GRID2/SYT1/PTPRD/CNR1/SORCS3/NLGN4Y/NRGN/DCC/CHRM3/AKAP12/FGF12/SNCG/PLP1/NRG1/KAT2A/CACNB2/GRID1/PLCL1/GABRA2/SLC24A2/IL1RAPL1/NOVA1/GRIK1/GNAI1/LRRC4C/PCDH17/FGF14/NLGN4X/GRIK4/GRM8/NSMF/LAMA2/SPG11/OPHN1/PXK/SST/GRIK2/GIPC1/SQSTM1/PDE7B/EPHB1/LRRK2/NTNG1/GRM3/FAM107A/CADPS2/APOE/SLC1A2/SYT17/CTBP2/DLGAP1/UNC13C/STX4/MINK1/C…	95
BP	GO:0034655	nucleobase-containing compound catabolic process	94/1100	238/5658	1.99532e-13	3.8029e-11	3.48083e-11	RPS15/HSPB1/CIRBP/RPL8/RPL13/HSPA8/HSPA1A/RPS27A/RPL37A/ALDOA/RPL37/RPL18/RPS6/UBB/RPL31/PRKCA/RPS9/DDX5/LSM7/RPS24/RPL38/DPYD/HSPA1B/UPF3B/RPLP2/RPS18/PSME4/UPF3A/RPS23/RPS29/RPL28/RPL35/RPS4X/RPL24/PDE1A/RPL32/RNH1/HNRNPM/PFKFB3/RPS25/RPS28/UBC/RPS4Y1/RPL29/RPS19/RPL11/RPLP1/HNRNPU/RPL41/RPS12/PDE4B/RPL27A/RPL36/RPS8/PDE7B/DNPH1/RPS17/RPS20/RPL10/ZFP36L1/CECR2/RPL19/ATM/NT5C2/RPSA/RPL30/LSM2/RP…	94
BP	GO:0099537	trans-synaptic signaling	94/1100	238/5658	1.99532e-13	3.8029e-11	3.48083e-11	SLC17A7/PRNP/NRXN1/NPTXR/NLGN1/HSPA8/CNTN4/SV2C/NRG3/GABRB1/KCND2/GRM7/GRID2/SYT1/PTPRD/CNR1/SORCS3/NLGN4Y/NRGN/DCC/CHRM3/AKAP12/FGF12/SNCG/PLP1/KAT2A/CACNB2/GRID1/PLCL1/GABRA2/SLC24A2/IL1RAPL1/NOVA1/GRIK1/GNAI1/LRRC4C/PCDH17/FGF14/NLGN4X/GRIK4/GRM8/NSMF/LAMA2/SPG11/OPHN1/PXK/SST/GRIK2/GIPC1/SQSTM1/PDE7B/EPHB1/LRRK2/NTNG1/GRM3/FAM107A/CADPS2/APOE/SLC1A2/SYT17/CTBP2/DLGAP1/UNC13C/STX4/MINK1/CLSTN2…	94
BP	GO:0072657	protein localization to membrane	98/1100	254/5658	3.26925e-13	5.95998e-11	5.45523e-11	RPS15/PRNP/NRXN1/RPL8/RPL13/NLGN1/RPS27A/RPL37A/SORBS1/SRP14/RPL37/PACS2/GPC6/RPL18/RPS6/RPL31/RPS9/ATP1B1/RPS24/RPL38/PID1/GAK/CACNB2/RPLP2/RPS18/GRIP1/ACTB/HSP90AA1/RPS23/LRP1/RAMP1/RPS29/RPL28/RPL35/RPS4X/RPL24/RPL32/RPS25/NPC1/RPS28/KCNIP4/RPS4Y1/GRIK2/RPL29/RPS19/RPL11/RPLP1/RPL41/RPS12/TGFB1/PEX16/RAB31/RPL27A/RPL36/RPS8/SQSTM1/RPS17/RPS20/RPL10/DPP10/STX8/APOE/ARFRP1/RPL19/RPSA/HSPA5/STX4/…	98
CC	GO:0022627	cytosolic small ribosomal subunit	24/1131	31/5894	3.31148e-12	6.17259e-11	4.35023e-11	RPS15/RPS27A/RPS6/RPS9/RPS24/RPS18/RPS23/RPS29/RPS4X/RPS25/RPS28/RPS4Y1/RPS19/RPS12/RPS8/RPS17/RPS20/RPSA/RPS13/RPS16/UBA52/RPS3/RPS2/RPS11	24
BP	GO:0048858	cell projection morphogenesis	102/1100	269/5658	3.76433e-13	6.5766e-11	6.01963e-11	CCK/CNTNAP2/GPM6A/NRXN1/CFL1/NLGN1/ROBO2/CNTN4/STMN1/UNC5D/SYT1/EPHA6/PTPRD/KIRREL3/UBB/MEF2A/NRXN3/ZEB2/DNM2/PRKCA/NFIB/DCC/SEMA6D/APBB2/CHN1/IRS2/DSCAML1/IL1RAPL1/SLIT2/GRIP1/MT3/ACTB/HSP90AA1/LRRC4C/S100A6/ALCAM/LRP1/DNM3/IFRD1/RPL24/SRGAP2/NSMF/BMPR1B/UNC5C/LAMA2/SPG11/NRP1/OPHN1/COBL/UST/SRCIN1/PTPRZ1/PALLD/ETV1/EPHB1/IQGAP1/LRRK2/NTNG1/KLF7/APOE/SYT17/DSCAM/PTPRM/GAB1/MINK1/PSEN1/POU3F2/DAB…	102
BP	GO:0050808	synapse organization	70/1100	158/5658	4.30583e-13	6.88052e-11	6.29781e-11	GPM6A/PRNP/NRXN1/CFL1/NLGN1/ROBO2/ERBB4/GRID2/CNTN5/ZNF804A/PTPRD/KIRREL3/LINGO2/NLGN4Y/SPARCL1/TUBA1A/NFIA/SNCG/NRG1/CAST/CACNB2/SDK1/GABRA2/IL1RAPL1/CDH9/ACTB/LRRC4C/DNM3/IL1RAPL2/PCDH17/CBLN2/ARHGAP22/NLGN4X/CTTNBP2/NRP1/OPHN1/SRCIN1/SEZ6L/EPHB1/LRRK2/NTNG1/SPOCK2/APOE/CTBP2/DSCAM/UNC13C/PFN1/CLSTN2/PSEN1/INSR/PDZRN3/CTNNB1/ASIC2/TNR/SYNDIG1/CYFIP1/DGKB/DOCK10/ANAPC2/SEMA3E/WNT7B/NTN1/SPARC/AC…	70
BP	GO:0044265	cellular macromolecule catabolic process	136/1100	398/5658	4.33553e-13	6.88052e-11	6.29781e-11	RPS15/HSPB1/CIRBP/ENC1/RPL8/RPL13/HSPA8/HSPA1A/RPS27A/GABARAPL2/RPL37A/RPL37/RPL18/RPS6/UBB/USP32/RPL31/PRKCA/RPS9/DDX5/LSM7/RPS24/RPL38/HSPA1B/UPF3B/RPLP2/RPS18/CDK5RAP3/UBXN1/SPSB3/RNF213/VPS28/PSME4/UPF3A/HSP90AA1/RPS23/LRP1/RPS29/RPL28/ANKZF1/RPL35/RPS4X/RPL24/RYBP/RPL32/RNH1/CLU/HNRNPM/ARIH2/RPS25/RPS28/CTSF/UBC/RPS4Y1/OPHN1/GIPC1/RPL29/RPS19/RPL11/RPLP1/HNRNPU/RPL41/RPS12/NELL1/WWTR1/SIRT2/…	136
BP	GO:0120039	plasma membrane bounded cell projection morphogenesis	101/1100	266/5658	4.49037e-13	6.88052e-11	6.29781e-11	CCK/CNTNAP2/GPM6A/NRXN1/CFL1/NLGN1/ROBO2/CNTN4/STMN1/UNC5D/SYT1/EPHA6/PTPRD/KIRREL3/UBB/MEF2A/NRXN3/ZEB2/DNM2/PRKCA/NFIB/DCC/SEMA6D/APBB2/CHN1/IRS2/DSCAML1/IL1RAPL1/SLIT2/GRIP1/MT3/ACTB/HSP90AA1/LRRC4C/S100A6/ALCAM/LRP1/DNM3/IFRD1/RPL24/SRGAP2/NSMF/BMPR1B/UNC5C/LAMA2/SPG11/NRP1/OPHN1/COBL/UST/SRCIN1/PTPRZ1/PALLD/ETV1/EPHB1/IQGAP1/LRRK2/NTNG1/KLF7/APOE/SYT17/DSCAM/PTPRM/GAB1/MINK1/PSEN1/POU3F2/DAB…	101
BP	GO:0006886	intracellular protein transport	130/1100	375/5658	4.59467e-13	6.88052e-11	6.29781e-11	RPS15/HSPB1/PRNP/RPL8/RPL13/NLGN1/HSPA8/RPS27A/RPL37A/SRP14/RPL37/RANBP17/TSC2/RPL18/RPS6/UBB/RPL31/HIP1/RPS9/ATP1B1/AKAP12/RPS24/RPL38/MYO6/UPF3B/RPLP2/RPS18/SRSF2/SRRM1/GRIP1/VPS28/HSP90AA1/RPS23/RAMP1/RAB40B/TBC1D22A/RPS29/RPL28/RPL35/RPS4X/RPL24/RPL32/ASPSCR1/CLU/MICALL2/SREBF2/ARIH2/RPS25/RPS28/UBC/RPS4Y1/DDX39A/GIPC1/RPL29/RPS19/RPL11/RPLP1/HNRNPU/HNRNPA2B1/RAB33A/RPL41/RPS12/TGFB1/PEX5L/ZF…	130
BP	GO:0007268	chemical synaptic transmission	91/1100	232/5658	7.99236e-13	1.11707e-10	1.02246e-10	SLC17A7/PRNP/NRXN1/NPTXR/NLGN1/HSPA8/CNTN4/SV2C/NRG3/GABRB1/KCND2/GRM7/GRID2/SYT1/CNR1/SORCS3/NLGN4Y/NRGN/DCC/CHRM3/AKAP12/FGF12/SNCG/PLP1/KAT2A/CACNB2/GRID1/PLCL1/GABRA2/SLC24A2/NOVA1/GRIK1/GNAI1/LRRC4C/PCDH17/FGF14/NLGN4X/GRIK4/GRM8/NSMF/LAMA2/SPG11/OPHN1/PXK/SST/GRIK2/GIPC1/SQSTM1/PDE7B/EPHB1/LRRK2/NTNG1/GRM3/FAM107A/CADPS2/APOE/SLC1A2/SYT17/CTBP2/DLGAP1/UNC13C/STX4/MINK1/CLSTN2/ADCY8/PSEN1/PP…	91
BP	GO:0098916	anterograde trans-synaptic signaling	91/1100	232/5658	7.99236e-13	1.11707e-10	1.02246e-10	SLC17A7/PRNP/NRXN1/NPTXR/NLGN1/HSPA8/CNTN4/SV2C/NRG3/GABRB1/KCND2/GRM7/GRID2/SYT1/CNR1/SORCS3/NLGN4Y/NRGN/DCC/CHRM3/AKAP12/FGF12/SNCG/PLP1/KAT2A/CACNB2/GRID1/PLCL1/GABRA2/SLC24A2/NOVA1/GRIK1/GNAI1/LRRC4C/PCDH17/FGF14/NLGN4X/GRIK4/GRM8/NSMF/LAMA2/SPG11/OPHN1/PXK/SST/GRIK2/GIPC1/SQSTM1/PDE7B/EPHB1/LRRK2/NTNG1/GRM3/FAM107A/CADPS2/APOE/SLC1A2/SYT17/CTBP2/DLGAP1/UNC13C/STX4/MINK1/CLSTN2/ADCY8/PSEN1/PP…	91
BP	GO:0048667	cell morphogenesis involved in neuron differentiation	91/1100	233/5658	1.07167e-12	1.44952e-10	1.32676e-10	CCK/NRXN1/CFL1/NLGN1/ROBO2/CNTN4/STMN1/UNC5D/EPHA6/PTPRD/MEF2A/NRXN3/ZEB2/DNM2/PRKCA/NFIB/DCC/SEMA6D/APBB2/CHN1/IRS2/DSCAML1/IL1RAPL1/SLIT2/MT3/ACTB/HSP90AA1/LRRC4C/S100A6/ALCAM/LRP1/DNM3/IFRD1/RPL24/NSMF/BMPR1B/UNC5C/LAMA2/SPG11/NRP1/OPHN1/COBL/UST/SRCIN1/PTPRZ1/PALLD/ETV1/EPHB1/LRRK2/NTNG1/KLF7/APOE/DSCAM/PTPRM/GAB1/MINK1/PSEN1/POU3F2/DAB1/ZSWIM8/ABI1/SZT2/BSG/C12orf57/TNIK/STK11/TNR/ZSWIM6/CYF…	91
BP	GO:0031175	neuron projection development	135/1100	399/5658	1.24674e-12	1.62545e-10	1.48779e-10	CCK/CNTNAP2/CSMD3/GPM6A/NRXN1/CFL1/NPTXR/NLGN1/ROBO2/CNTN4/STMN1/GRID2/ZNF804A/UNC5D/SYT1/EPHA6/PTPRD/TENM3/CNR1/KIRREL3/UBB/MEF2A/NCAM2/NRXN3/ZEB2/LGALS1/DNM2/ACAP3/PRKCA/NFIB/DCC/PTPRK/SEMA6D/ITM2C/PLP1/GAK/APBB2/CHN1/SDK1/GNAO1/IRS2/DSCAML1/IL1RAPL1/SLIT2/GRIP1/MT3/ACTB/HSP90AA1/LRRC4C/S100A6/ALCAM/LRP1/DNM3/IFRD1/RPL24/SRGAP2/STMN4/PTPRG/MICALL2/NSMF/BMPR1B/UNC5C/LAMA2/SPG11/GPM6B/NRP1/OPHN1/…	135
BP	GO:0044270	cellular nitrogen compound catabolic process	95/1100	248/5658	1.27927e-12	1.62545e-10	1.48779e-10	RPS15/HSPB1/CIRBP/RPL8/RPL13/HSPA8/HSPA1A/RPS27A/RPL37A/ALDOA/RPL37/RPL18/RPS6/UBB/RPL31/PRKCA/RPS9/DDX5/LSM7/RPS24/RPL38/DPYD/HSPA1B/UPF3B/RPLP2/RPS18/PSME4/UPF3A/RPS23/RPS29/RPL28/RPL35/RPS4X/RPL24/PDE1A/RPL32/RNH1/HNRNPM/PFKFB3/RPS25/RPS28/UBC/RPS4Y1/RPL29/RPS19/RPL11/RPLP1/HNRNPU/RPL41/RPS12/PDE4B/RPL27A/RPL36/RPS8/PDE7B/DNPH1/RPS17/RPS20/RPL10/ZFP36L1/TET2/CECR2/RPL19/ATM/NT5C2/RPSA/RPL30/LS…	95
BP	GO:0046700	heterocycle catabolic process	95/1100	251/5658	2.93034e-12	3.61379e-10	3.30774e-10	RPS15/HSPB1/CIRBP/RPL8/RPL13/HSPA8/HSPA1A/RPS27A/RPL37A/ALDOA/RPL37/RPL18/RPS6/UBB/RPL31/PRKCA/RPS9/DDX5/LSM7/RPS24/RPL38/DPYD/HSPA1B/UPF3B/RPLP2/RPS18/PSME4/UPF3A/RPS23/RPS29/RPL28/RPL35/RPS4X/RPL24/PDE1A/RPL32/RNH1/HNRNPM/PFKFB3/RPS25/RPS28/UBC/RPS4Y1/RPL29/RPS19/RPL11/RPLP1/HNRNPU/RPL41/RPS12/PDE4B/RPL27A/RPL36/RPS8/PDE7B/DNPH1/RPS17/RPS20/RPL10/ZFP36L1/TET2/CECR2/RPL19/ATM/NT5C2/RPSA/RPL30/LS…	95
BP	GO:0019439	aromatic compound catabolic process	96/1100	255/5658	3.22245e-12	3.86049e-10	3.53355e-10	RPS15/HSPB1/CIRBP/RPL8/RPL13/HSPA8/HSPA1A/RPS27A/RPL37A/ALDOA/RPL37/RPL18/RPS6/UBB/RPL31/PRKCA/RPS9/DDX5/LSM7/RPS24/RPL38/DPYD/HSPA1B/UPF3B/RPLP2/RPS18/PSME4/UPF3A/RPS23/RPS29/RPL28/ASRGL1/RPL35/RPS4X/RPL24/PDE1A/RPL32/RNH1/HNRNPM/PFKFB3/RPS25/RPS28/UBC/RPS4Y1/RPL29/RPS19/RPL11/RPLP1/HNRNPU/RPL41/RPS12/PDE4B/RPL27A/RPL36/RPS8/PDE7B/DNPH1/RPS17/RPS20/RPL10/ZFP36L1/TET2/CECR2/RPL19/ATM/NT5C2/RPSA/R…	96
CC	GO:0042734	presynaptic membrane	34/1131	58/5894	2.91613e-11	5.22661e-10	3.68354e-10	GPM6A/NRXN1/ERBB4/GRM7/CNTN5/SYT1/CNR1/KCNC2/HIP1/CHRM3/GRIK1/CDH10/CDH9/ATP2B4/PCDH17/KCTD8/GRIK4/GRM8/GRIK2/ROGDI/SYAP1/NTNG1/GRM3/CADPS2/SLC1A2/UNC13C/STX4/ADCY8/PSEN1/CTNNB1/SYT11/CANX/CNTNAP4/SLC6A9	34
BP	GO:0048666	neuron development	147/1100	453/5658	4.54351e-12	5.29193e-10	4.84376e-10	CCK/CNTNAP2/CSMD3/GPM6A/NRXN1/CFL1/NPTXR/NLGN1/ROBO2/CNTN4/GABRB1/STMN1/GRID2/ZNF804A/UNC5D/SYT1/EPHA6/PTPRD/TENM3/CNR1/KIRREL3/UBB/MEF2A/NCAM2/NRXN3/ZEB2/LGALS1/DNM2/ACAP3/PRKCA/NFIB/DCC/PTPRK/SEMA6D/ITM2C/DCLK2/PLP1/GAK/APBB2/CHN1/SDK1/GNAO1/IRS2/DSCAML1/IL1RAPL1/SLIT2/LGI4/RUNX1/GRIP1/MT3/SLC4A7/ACTB/HSP90AA1/LRRC4C/S100A6/ALCAM/LRP1/DNM3/IFRD1/RPL24/SRGAP2/STMN4/PTPRG/MICALL2/NSMF/BMPR1B/UNC5…	147
CC	GO:0015935	small ribosomal subunit	24/1131	33/5894	3.25972e-11	5.62604e-10	3.96504e-10	RPS15/RPS27A/RPS6/RPS9/RPS24/RPS18/RPS23/RPS29/RPS4X/RPS25/RPS28/RPS4Y1/RPS19/RPS12/RPS8/RPS17/RPS20/RPSA/RPS13/RPS16/UBA52/RPS3/RPS2/RPS11	24
BP	GO:1901361	organic cyclic compound catabolic process	98/1100	264/5658	5.001e-12	5.66735e-10	5.18738e-10	RPS15/HSPB1/CIRBP/RPL8/RPL13/HSPA8/HSPA1A/RPS27A/RPL37A/ALDOA/RPL37/RPL18/RPS6/UBB/RPL31/PRKCA/RPS9/DDX5/LSM7/RPS24/RPL38/DPYD/HSPA1B/UPF3B/RPLP2/RPS18/PSME4/MT3/UPF3A/RPS23/RPS29/RPL28/ASRGL1/RPL35/RPS4X/RPL24/PDE1A/RPL32/RNH1/HNRNPM/PFKFB3/RPS25/RPS28/UBC/RPS4Y1/RPL29/RPS19/RPL11/RPLP1/HNRNPU/RPL41/RPS12/PDE4B/RPL27A/RPL36/RPS8/PDE7B/DNPH1/RPS17/RPS20/RPL10/ZFP36L1/TET2/CECR2/APOE/RPL19/ATM/NT5…	98
BP	GO:0006412	translation	77/1100	193/5658	1.89913e-11	2.09554e-09	1.91807e-09	RPS15/HSPB1/CIRBP/ENC1/RPL8/EIF1/RPL13/RPS27A/RPL37A/RPL37/RPL18/RPS6/RPL31/RPS9/IGFBP5/RPS24/RPL38/UPF3B/RPLP2/RPS18/EEF1A1/UPF3A/RPS23/RPS29/RPL28/RPL35/RPS4X/RPL24/RPL32/PER1/CPEB2/RPS25/RPS28/ATF4/RPS4Y1/EIF2S2/RPL29/RPS19/RPL11/RPLP1/RPL41/RPS12/QKI/RPL27A/RPL36/RPS8/RPS17/RPS20/RPL10/EIF3G/ZFP36L1/RPS6KB2/EEF1D/FOXO3/RPL19/RPSA/RPL30/RPL27/RPS13/RPL23A/RPS16/UBA52/RPS3/RPL23/RPS2/RBM4B/SOX4…	77
CC	GO:0098793	presynapse	69/1131	173/5894	1.26253e-10	2.10121e-09	1.48086e-09	CCK/SLC17A7/GPM6A/NRXN1/NLGN1/HSPA8/SV2C/ERBB4/GRM7/CNTN5/ZNF804A/SYT1/CNR1/NLGN4Y/DNM2/KCNC2/HIP1/CHRM3/GAK/RABAC1/CACNB2/GABRA2/GRIK1/MT3/CDH10/CDH9/ACTB/DNAJC6/ATP2B4/DNM3/PCDH17/KCTD8/NLGN4X/GRIK4/GRM8/CTTNBP2/OPHN1/GRIK2/GIPC1/PDE4B/ROGDI/SYAP1/LRRK2/NTNG1/GRM3/SH3GL3/CADPS2/SLC1A2/SYNPR/SYT17/CTBP2/UNC13C/STX4/ADCY8/PSEN1/PPFIA1/SYNJ2/CTNNB1/SYT11/CANX/CNTNAP4/TNIK/SLC6A9/SYNDIG1/CYFIP1/ACT…	69
CC	GO:0043025	neuronal cell body	71/1131	181/5894	1.65458e-10	2.65874e-09	1.87379e-09	CCK/CAMK2N1/CNTNAP2/BRINP3/GPM6A/TUBB4A/NRXN1/NPTXR/CKB/KCND2/ZNF804A/UBB/GRIA4/NRGN/KCNC2/FUS/AKAP12/PTPRK/SNCG/KCNAB1/MYO1D/UBXN1/PAM/ASTN2/HSP90AA1/ALCAM/LRP1/ELOVL5/PDE1A/CRYAB/NSMF/BMPR1B/UNC5C/NRP1/SST/GRIK2/COBL/TGFB1/SRCIN1/SIRT2/ROGDI/SYAP1/SEZ6L/KLHL24/LRRK2/APOE/DSCAM/ADCY8/PSEN1/FABP7/SCN1A/HIP1R/DAB1/INSR/CIB1/CANX/MBP/ASIC2/LRP6/CYFIP1/BMPR1A/DNAJB1/FEZ1/HSP90AA2P/SLC1A3/APOD/ADAM10…	71
BP	GO:0043043	peptide biosynthetic process	79/1100	204/5658	5.99335e-11	6.44361e-09	5.8979e-09	RPS15/HSPB1/CIRBP/ENC1/RPL8/EIF1/RPL13/RPS27A/RPL37A/RPL37/RPL18/RPS6/RPL31/RPS9/IGFBP5/RPS24/RPL38/UPF3B/RPLP2/RPS18/EEF1A1/PCSK5/UPF3A/RPS23/RPS29/RPL28/RPL35/RPS4X/RPL24/RPL32/PER1/CPEB2/RPS25/RPS28/ATF4/RPS4Y1/EIF2S2/RPL29/RPS19/RPL11/RPLP1/RPL41/AASDH/RPS12/QKI/RPL27A/RPL36/RPS8/RPS17/RPS20/RPL10/EIF3G/ZFP36L1/RPS6KB2/EEF1D/FOXO3/RPL19/RPSA/RPL30/RPL27/RPS13/RPL23A/RPS16/UBA52/RPS3/RPL23/RPS…	79
CC	GO:0033267	axon part	56/1131	134/5894	9.40269e-10	1.46055e-08	1.02935e-08	CCK/CNTNAP2/HSPB1/GPM6A/TUBB4A/NPTXR/ROBO2/HSPA8/ZNF804A/PCDH9/CNR1/DNM2/KCNC2/ACAP3/NAV1/CHRM3/APBB2/KCNAB1/MYO1D/ACTB/HSP90AA1/LRP1/STMN4/UNC5C/NRP1/OPHN1/GRIK2/COBL/SIRT2/SYAP1/PALLD/IQGAP1/LRRK2/SLC1A2/DSCAM/UNC13C/PSEN1/SCN1A/ABI1/MYH14/TENM2/SYT11/CIB1/MBP/CYFIP1/TRAK1/FEZ1/SPOCK1/YWHAE/DICER1/ACTG1/RAB5A/KIF13B/PENK/DOCK7/IQCJ-SCHIP1	56
MF	GO:0005198	structural molecule activity	98/1089	275/5628	5.79289e-11	1.71759e-08	1.54274e-08	RPS15/TUBB4A/RPL8/RPL13/RPS27A/RPL37A/EDIL3/RPL37/TUBB2A/COL16A1/RPL18/RPS6/RPL31/TUBA1A/HIP1/RPS9/RPS24/RPL38/COL21A1/PLP1/UPF3B/RPLP2/COL11A1/RPS18/AKAP13/GRIP1/COL5A2/ACTB/UPF3A/RPS23/RPS29/RPL28/DNM3/RPL35/RPS4X/RPL24/RPL32/CRYAB/RPS25/RPS28/LAMA2/RPS4Y1/SNTG1/RPL29/RPS19/RPL11/RPLP1/RPL41/RPS12/CTNNA1/TUBA1B/RPL27A/RPL36/RPS8/RPS17/RPS20/RPL10/LRRK2/EPB41L2/SPAG9/APOE/ADD1/CRYBG3/CLDN11/RPL1…	98
CC	GO:0044297	cell body	76/1131	208/5894	1.81e-09	2.72084e-08	1.91756e-08	CCK/CAMK2N1/CNTNAP2/BRINP3/GPM6A/TUBB4A/NRXN1/NPTXR/CKB/KCND2/ZNF804A/RPS6/UBB/GRIA4/NRGN/KCNC2/FUS/AKAP12/PTPRK/SNCG/GNAO1/KCNAB1/MYO1D/UBXN1/PAM/ASTN2/HSP90AA1/ALCAM/LRP1/RPL28/ELOVL5/PDE1A/CRYAB/NSMF/BMPR1B/UNC5C/NRP1/SST/GRIK2/COBL/TGFB1/SRCIN1/SIRT2/ROGDI/SYAP1/SEZ6L/KLHL24/LRRK2/APOE/DSCAM/ADCY8/PSEN1/FABP7/SCN1A/HIP1R/DAB1/INSR/SYT11/CIB1/CANX/MBP/ASIC2/LRP6/SYNDIG1/CYFIP1/BMPR1A/DNAJB1/FE…	76
BP	GO:0006518	peptide metabolic process	93/1100	263/5658	3.94465e-10	4.13498e-08	3.78479e-08	RPS15/HSPB1/CIRBP/PRNP/SNRNP70/ENC1/RPL8/EIF1/RPL13/HSPA8/RPS27A/RPL37A/RPL37/RPL18/RPS6/RPL31/RPS9/IGFBP5/RPS24/RPL38/UPF3B/RPLP2/RPS18/EEF1A1/PCSK5/PAM/UPF3A/HSP90AA1/RPS23/RPS29/RPL28/RPL35/RPS4X/RPL24/RPL32/CLU/PER1/CPEB2/RPS25/RPS28/ATF4/RPS4Y1/EIF2S2/RPL29/RPS19/RPL11/RPLP1/RPL41/AASDH/RPS12/QKI/RPL27A/RPL36/RPS8/RPS17/RPS20/RPL10/EIF3G/ZFP36L1/RPS6KB2/CPM/EEF1D/FOXO3/APOE/SORL1/RPL19/RPSA/…	93
CC	GO:0099699	integral component of synaptic membrane	28/1131	50/5894	6.98073e-09	1.01657e-07	7.16443e-08	GPM6A/NRXN1/NLGN1/KCND2/ERBB4/GRID2/CNR1/SORCS3/DCC/CHRM3/GRID1/CDH10/CDH9/LRRC4C/ATP2B4/PCDH17/GRIK4/NRP1/GRM3/SLC1A2/CLSTN2/ADCY8/PSEN1/SLC8A1/SYT11/CANX/SLC6A9/CSPG5	28
CC	GO:0042788	polysomal ribosome	15/1131	18/5894	7.40623e-09	1.04585e-07	7.3708e-08	RPL8/RPL18/RPL31/RPL38/RPS23/RPS29/RPL24/RPL32/RPS28/RPL11/RPL41/RPL36/RPL19/RPL30/BTF3	15
BP	GO:0000902	cell morphogenesis	140/1100	456/5658	1.27846e-09	1.30746e-07	1.19673e-07	CCK/CNTNAP2/GPM6A/NRXN1/CFL1/NLGN1/ROBO2/FMNL2/CNTN4/STMN1/CAPZB/ALDOA/UNC5D/SYT1/CDH12/EPHA6/PTPRD/KIRREL3/UBB/MEF2A/NRXN3/ZEB2/SS18/DNM2/PRKCA/NFIB/DCC/SEMA6D/COL21A1/NRG1/APBB2/CHN1/IRS2/DSCAML1/IL1RAPL1/SLIT2/GRIP1/MT3/CDH10/CDH9/ACTB/HSP90AA1/LRRC4C/S100A6/ALCAM/LRP1/ZNF135/DNM3/CDH13/IFRD1/RPL24/SRGAP2/CLU/SHROOM3/MICALL2/NSMF/BMPR1B/UNC5C/STRIP2/LIMS2/LAMA2/SPG11/NRP1/OPHN1/COBL/UST/NEDD9/…	140
BP	GO:0050804	modulation of chemical synaptic transmission	63/1100	158/5658	1.42634e-09	1.42396e-07	1.30336e-07	PRNP/NRXN1/NPTXR/NLGN1/CNTN4/NRG3/GRM7/GRID2/SYT1/CNR1/SORCS3/NLGN4Y/NRGN/DCC/AKAP12/SNCG/KAT2A/CACNB2/GRID1/PLCL1/SLC24A2/GRIK1/GNAI1/LRRC4C/PCDH17/FGF14/NLGN4X/GRIK4/GRM8/NSMF/LAMA2/OPHN1/PXK/GRIK2/GIPC1/SQSTM1/EPHB1/LRRK2/NTNG1/GRM3/FAM107A/APOE/UNC13C/STX4/CLSTN2/ADCY8/PSEN1/SYT11/SERPINE2/CNTNAP4/SLC6A9/TNR/CYFIP1/CSPG5/DGKB/ANAPC2/PLCG1/STAT3/SLC1A3/MEF2C/SORCS2/RAB5A/GRIN3A	63
CC	GO:0005844	polysome	21/1131	32/5894	1.09746e-08	1.50416e-07	1.06008e-07	RPL8/RPL18/RPS6/RPL31/FUS/RPL38/RPS23/RPS29/RPS4X/RPL24/RPL32/RPS28/RPS4Y1/RPL11/RPL41/RPL36/RPL19/RPL30/RPS3/BTF3/MSI2	21
CC	GO:0070161	anchoring junction	99/1131	306/5894	1.23094e-08	1.63891e-07	1.15505e-07	RPS15/HSPB1/KAZN/RPL8/CFL1/HSPA8/HSPA1A/RPL37A/SORBS1/CDH12/RPL18/PKP4/DNM2/RPL31/RPS9/AKAP12/FRMD4A/PTPRK/RPL38/HSPA1B/GAK/SVIL/PLEKHA7/RPLP2/RPS18/CDH10/CDH9/ACTB/ITGB8/UBA1/ALCAM/LRP1/RPS29/CDH13/ARHGAP22/RPS4X/SHROOM3/MARCKS/LIMS2/HNRNPK/NRP1/TNK2/PPIA/RPS19/RPLP1/CTNNA1/NEDD9/TMEM47/CYTH1/FRMD5/RPS8/FRMD4B/PALLD/RPS17/IQGAP1/KLHL24/CTNNA3/EPB41L2/FAM107A/ADD1/RPL19/STXBP6/MYO1E/PTPRM/HSPA5/P…	99
BP	GO:0007409	axonogenesis	72/1100	191/5658	1.79449e-09	1.72923e-07	1.58278e-07	CCK/NRXN1/ROBO2/CNTN4/STMN1/UNC5D/EPHA6/NRXN3/ZEB2/DNM2/PRKCA/NFIB/DCC/SEMA6D/APBB2/CHN1/IRS2/DSCAML1/SLIT2/MT3/ACTB/HSP90AA1/LRRC4C/S100A6/ALCAM/LRP1/IFRD1/RPL24/BMPR1B/UNC5C/LAMA2/SPG11/NRP1/OPHN1/COBL/UST/PTPRZ1/PALLD/ETV1/EPHB1/NTNG1/KLF7/APOE/DSCAM/PTPRM/GAB1/PSEN1/POU3F2/DAB1/ZSWIM8/SZT2/BSG/C12orf57/STK11/TNR/ZSWIM6/CYFIP1/TRAK1/FEZ1/ANAPC2/PLCG1/SEMA3E/NEO1/DOK5/NTN1/RPS6KA5/SEMA5A/ROBO1/…	72
BP	GO:0008380	RNA splicing	67/1100	173/5658	1.8146e-09	1.72923e-07	1.58278e-07	CIRBP/SNRNP70/CELF2/KHDRBS3/HSPA8/HSPA1A/MBNL1/SON/CLASRP/SRRM2/FUS/DDX5/LSM7/PCBP1/UPF3B/SRSF2/SRRM1/BCAS2/NOVA1/SF1/TMBIM6/HNRNPM/PRPF4B/POLR2L/HNRNPK/DDX39A/HNRNPU/HNRNPA2B1/QKI/NONO/RTCB/MBNL2/RBMX/UBL5/SRRT/SFSWAP/PRPF38B/DAZAP1/POLR2F/RBFOX1/LSM2/HNRNPA3/PTBP1/RBM19/RPS13/CLK1/SNRPD2/SRSF6/POLR2J/RBM4B/IWS1/PRPF6/RBM22/PRPF3/POLR2I/PPP4R2/XAB2/YTHDC1/TRA2A/SF3B1/ZNF326/SCAF11/SF3B5/KHSRP/PC…	67
BP	GO:0099177	regulation of trans-synaptic signaling	63/1100	159/5658	1.92749e-09	1.79599e-07	1.64389e-07	PRNP/NRXN1/NPTXR/NLGN1/CNTN4/NRG3/GRM7/GRID2/SYT1/CNR1/SORCS3/NLGN4Y/NRGN/DCC/AKAP12/SNCG/KAT2A/CACNB2/GRID1/PLCL1/SLC24A2/GRIK1/GNAI1/LRRC4C/PCDH17/FGF14/NLGN4X/GRIK4/GRM8/NSMF/LAMA2/OPHN1/PXK/GRIK2/GIPC1/SQSTM1/EPHB1/LRRK2/NTNG1/GRM3/FAM107A/APOE/UNC13C/STX4/CLSTN2/ADCY8/PSEN1/SYT11/SERPINE2/CNTNAP4/SLC6A9/TNR/CYFIP1/CSPG5/DGKB/ANAPC2/PLCG1/STAT3/SLC1A3/MEF2C/SORCS2/RAB5A/GRIN3A	63
BP	GO:0000904	cell morphogenesis involved in differentiation	105/1100	317/5658	2.01678e-09	1.83833e-07	1.68265e-07	CCK/NRXN1/CFL1/NLGN1/ROBO2/CNTN4/STMN1/UNC5D/EPHA6/PTPRD/MEF2A/NRXN3/ZEB2/DNM2/PRKCA/NFIB/DCC/SEMA6D/COL21A1/APBB2/CHN1/IRS2/DSCAML1/IL1RAPL1/SLIT2/MT3/ACTB/HSP90AA1/LRRC4C/S100A6/ALCAM/LRP1/DNM3/IFRD1/RPL24/SRGAP2/MICALL2/NSMF/BMPR1B/UNC5C/LIMS2/LAMA2/SPG11/NRP1/OPHN1/COBL/UST/NEDD9/SRCIN1/PTPRZ1/PALLD/ETV1/EPHB1/LRRK2/NTNG1/KLF7/APOE/DSCAM/PTPRM/GAB1/MINK1/PSEN1/POU3F2/LIMS1/DAB1/ZSWIM8/ABI1/SI…	105
CC	GO:0099240	intrinsic component of synaptic membrane	30/1131	57/5894	1.42631e-08	1.84628e-07	1.30119e-07	GPM6A/NRXN1/NLGN1/KCND2/ERBB4/GRID2/CNTN5/CNR1/SORCS3/DCC/CHRM3/GRID1/CDH10/CDH9/LRRC4C/ATP2B4/PCDH17/GRIK4/NRP1/NTNG1/GRM3/SLC1A2/CLSTN2/ADCY8/PSEN1/SLC8A1/SYT11/CANX/SLC6A9/CSPG5	30
BP	GO:0043604	amide biosynthetic process	85/1100	240/5658	2.15606e-09	1.92348e-07	1.76058e-07	RPS15/HSPB1/CIRBP/ENC1/RPL8/EIF1/RPL13/RPS27A/RPL37A/RPL37/RPL18/RPS6/RPL31/RPS9/IGFBP5/RPS24/RPL38/HSD17B12/UPF3B/RPLP2/RPS18/EEF1A1/PCSK5/UPF3A/RPS23/RPS29/RPL28/RPL35/RPS4X/RPL24/ELOVL5/RPL32/PER1/CPEB2/RPS25/RPS28/ATF4/RPS4Y1/ST3GAL5/EIF2S2/RPL29/RPS19/RPL11/RPLP1/RPL41/AASDH/RPS12/QKI/RPL27A/RPL36/RPS8/RPS17/RPS20/RPL10/EIF3G/ST6GALNAC3/ZFP36L1/RPS6KB2/EEF1D/FOXO3/RPL19/SGMS1/RPSA/RPL30/RPL2…	85
BP	GO:0033365	protein localization to organelle	103/1100	310/5658	2.40298e-09	2.09911e-07	1.92133e-07	RPS15/RPL8/RPL13/HSPA8/RPS27A/RPL37A/SRP14/RPL37/RANBP17/TSC2/GPC6/RPL18/RPS6/UBB/RPL31/RPS9/RPS24/RPL38/DCLK2/GAK/RPLP2/RPS18/LAMTOR4/CDK5RAP3/VPS28/HSP90AA1/RPS23/RPS29/RPL28/RPL35/RPS4X/RPL24/RPL32/CLU/MICALL2/SREBF2/ARIH2/RPS25/RPS28/UBC/RPS4Y1/NRP1/RPL29/RPS19/RPL11/RPLP1/HNRNPU/RPL41/RPS12/TGFB1/PEX5L/ZFYVE16/PEX16/OS9/RPL27A/RPL36/RPS8/DMAP1/RPS17/RPS20/RPL10/MAU2/LRRK2/TIMM23B/SORL1/ARFRP…	103
BP	GO:0099504	synaptic vesicle cycle	33/1100	62/5658	2.57101e-09	2.20005e-07	2.01373e-07	SLC17A7/NRXN1/NLGN1/SYT1/CNR1/NLGN4Y/DNM2/GAK/CACNB2/ACTB/DNAJC6/DNM3/PCDH17/FGF14/NLGN4X/OPHN1/GIPC1/LRRK2/CADPS2/SYT17/CTBP2/UNC13C/STX4/PSEN1/CTNNB1/SYT11/CANX/SYNDIG1/CYFIP1/CSPG5/ACTG1/RAB5A/GRIN3A	33
CC	GO:0005912	adherens junction	97/1131	300/5894	1.80811e-08	2.27724e-07	1.60492e-07	RPS15/HSPB1/RPL8/CFL1/HSPA8/HSPA1A/RPL37A/SORBS1/CDH12/RPL18/PKP4/DNM2/RPL31/RPS9/AKAP12/FRMD4A/PTPRK/RPL38/HSPA1B/GAK/SVIL/PLEKHA7/RPLP2/RPS18/CDH10/CDH9/ACTB/ITGB8/ALCAM/LRP1/RPS29/CDH13/ARHGAP22/RPS4X/SHROOM3/MARCKS/LIMS2/HNRNPK/NRP1/TNK2/PPIA/RPS19/RPLP1/CTNNA1/NEDD9/TMEM47/CYTH1/FRMD5/RPS8/FRMD4B/PALLD/RPS17/IQGAP1/KLHL24/CTNNA3/EPB41L2/FAM107A/ADD1/RPL19/STXBP6/MYO1E/PTPRM/HSPA5/PFN1/RPL30/…	97
BP	GO:0061564	axon development	77/1100	211/5658	2.7304e-09	2.28971e-07	2.0958e-07	CCK/NRXN1/ROBO2/CNTN4/STMN1/UNC5D/EPHA6/CNR1/NCAM2/NRXN3/ZEB2/DNM2/PRKCA/NFIB/DCC/SEMA6D/PLP1/APBB2/CHN1/IRS2/DSCAML1/SLIT2/MT3/ACTB/HSP90AA1/LRRC4C/S100A6/ALCAM/LRP1/IFRD1/RPL24/BMPR1B/UNC5C/LAMA2/SPG11/NRP1/OPHN1/COBL/CTNNA1/UST/PTPRZ1/PALLD/ETV1/EPHB1/NTNG1/KLF7/APOE/DSCAM/PTPRM/GAB1/PSEN1/POU3F2/DAB1/ZSWIM8/SZT2/BSG/C12orf57/STK11/TNR/ZSWIM6/CYFIP1/TRAK1/FEZ1/ANAPC2/PLCG1/SEMA3E/NEO1/DOK5/NTN…	77
BP	GO:0006396	RNA processing	99/1100	296/5658	3.39001e-09	2.78712e-07	2.55108e-07	RPS15/CIRBP/SNRNP70/CELF2/KHDRBS3/HSPA8/HSPA1A/MBNL1/SON/CLASRP/INTS6/RPS6/SRRM2/FUS/RPS9/DDX5/LSM7/RPS24/PCBP1/UPF3B/NCOR2/SRSF2/SRRM1/BCAS2/NOVA1/URM1/SF1/RPL35/TMBIM6/HNRNPM/SAFB2/PRPF4B/POLR2L/RPS28/HNRNPK/DDX39A/RPS19/RPL11/HNRNPU/HNRNPA2B1/QKI/TGFB1/NONO/RTCB/RPS8/MBNL2/RPS17/DDX18/ZFP36L1/ADARB2/RBMX/UBL5/SRRT/SFSWAP/PRPF38B/DAZAP1/POLR2F/RBFOX1/NELFE/LSM2/RPL27/HNRNPA3/PTBP1/RBM19/RPS13/R…	99
CC	GO:0098889	intrinsic component of presynaptic membrane	19/1131	28/5894	2.45759e-08	3.01379e-07	2.12401e-07	GPM6A/NRXN1/ERBB4/CNTN5/CNR1/CHRM3/CDH10/CDH9/ATP2B4/PCDH17/GRIK4/NTNG1/GRM3/SLC1A2/ADCY8/PSEN1/SYT11/CANX/SLC6A9	19
CC	GO:0150034	distal axon	43/1131	100/5894	3.15692e-08	3.77212e-07	2.65846e-07	CCK/GPM6A/NPTXR/HSPA8/ZNF804A/PCDH9/CNR1/DNM2/KCNC2/ACAP3/CHRM3/APBB2/ACTB/HSP90AA1/LRP1/STMN4/UNC5C/NRP1/OPHN1/GRIK2/COBL/SIRT2/SYAP1/PALLD/IQGAP1/LRRK2/DSCAM/UNC13C/PSEN1/ABI1/MYH14/TENM2/SYT11/CIB1/CYFIP1/TRAK1/FEZ1/YWHAE/DICER1/ACTG1/RAB5A/PENK/DOCK7	43
CC	GO:0030426	growth cone	31/1131	62/5894	3.97956e-08	4.63619e-07	3.26743e-07	GPM6A/NPTXR/ZNF804A/PCDH9/CNR1/DNM2/ACAP3/APBB2/HSP90AA1/LRP1/STMN4/UNC5C/NRP1/COBL/SIRT2/SYAP1/PALLD/IQGAP1/LRRK2/DSCAM/PSEN1/ABI1/MYH14/TENM2/CIB1/CYFIP1/TRAK1/FEZ1/YWHAE/DICER1/DOCK7	31
BP	GO:0032989	cellular component morphogenesis	146/1100	492/5658	7.22755e-09	5.82791e-07	5.33434e-07	CCK/CNTNAP2/GPM6A/NRXN1/CFL1/NLGN1/ROBO2/FMNL2/CNTN4/STMN1/CAPZB/ALDOA/UNC5D/SYT1/CDH12/EPHA6/PTPRD/KIRREL3/UBB/MEF2A/NRXN3/ZEB2/SS18/DNM2/PRKCA/NFIB/DCC/SEMA6D/COL21A1/PID1/NRG1/APBB2/CHN1/IRS2/DSCAML1/IL1RAPL1/AKAP13/SLIT2/GRIP1/MT3/CDH10/CDH9/ACTB/HSP90AA1/LRRC4C/S100A6/ALCAM/LRP1/ZNF135/DNM3/CDH13/IFRD1/RPL24/SRGAP2/CLU/SHROOM3/MICALL2/NSMF/BMPR1B/UNC5C/STRIP2/LIMS2/LAMA2/SPG11/NRP1/OPHN1/COB…	146
CC	GO:0099056	integral component of presynaptic membrane	17/1131	24/5894	5.12916e-08	5.82973e-07	4.1086e-07	GPM6A/NRXN1/ERBB4/CNR1/CHRM3/CDH10/CDH9/ATP2B4/PCDH17/GRIK4/GRM3/SLC1A2/ADCY8/PSEN1/SYT11/CANX/SLC6A9	17
BP	GO:0006397	mRNA processing	69/1100	186/5658	8.6368e-09	6.83285e-07	6.25417e-07	CIRBP/SNRNP70/CELF2/KHDRBS3/HSPA8/MBNL1/SON/CLASRP/SRRM2/FUS/DDX5/LSM7/PCBP1/UPF3B/SRSF2/SRRM1/BCAS2/NOVA1/SF1/HNRNPM/SAFB2/PRPF4B/POLR2L/HNRNPK/DDX39A/HNRNPU/HNRNPA2B1/QKI/NONO/MBNL2/ZFP36L1/ADARB2/RBMX/UBL5/SRRT/SFSWAP/PRPF38B/DAZAP1/POLR2F/RBFOX1/NELFE/LSM2/HNRNPA3/PTBP1/RBM19/SLTM/SNRPD2/SRSF6/POLR2J/RBM4B/IWS1/PRPF6/RBM22/PRPF3/POLR2I/HSF1/PPP4R2/XAB2/YTHDC1/TRA2A/SF3B1/ZNF326/SCAF11/SF3B5/K…	69
CC	GO:0030427	site of polarized growth	31/1131	63/5894	6.41542e-08	7.11807e-07	5.01657e-07	GPM6A/NPTXR/ZNF804A/PCDH9/CNR1/DNM2/ACAP3/APBB2/HSP90AA1/LRP1/STMN4/UNC5C/NRP1/COBL/SIRT2/SYAP1/PALLD/IQGAP1/LRRK2/DSCAM/PSEN1/ABI1/MYH14/TENM2/CIB1/CYFIP1/TRAK1/FEZ1/YWHAE/DICER1/DOCK7	31
BP	GO:0043603	cellular amide metabolic process	106/1100	330/5658	1.13845e-08	8.83988e-07	8.09123e-07	RPS15/HSPB1/CIRBP/PRNP/SNRNP70/ENC1/RPL8/EIF1/RPL13/HSPA8/RPS27A/RPL37A/RPL37/RPL18/RPS6/RPL31/RPS9/IGFBP5/RPS24/RPL38/HSD17B12/UPF3B/RPLP2/RPS18/EEF1A1/HMGCS1/PCSK5/PAM/ITGB8/UPF3A/HSP90AA1/RPS23/RPS29/RPL28/ASRGL1/RPL35/RPS4X/RPL24/ELOVL5/RPL32/CLU/PER1/CPEB2/RPS25/RPS28/ATF4/RPS4Y1/ST3GAL5/EIF2S2/RPL29/RPS19/RPL11/RPLP1/RPL41/AASDH/RPS12/QKI/RPL27A/RPL36/RPS8/RPS17/RPS20/RPL10/EIF3G/ST6GALNAC3…	106
BP	GO:0099003	vesicle-mediated transport in synapse	31/1100	59/5658	1.18461e-08	9.03105e-07	8.26621e-07	SLC17A7/NLGN1/SYT1/CNR1/NLGN4Y/DNM2/GAK/CACNB2/GRIP1/ACTB/DNAJC6/DNM3/NLGN4X/SPG11/OPHN1/GIPC1/LRRK2/CADPS2/SYT17/CTBP2/UNC13C/STX4/PSEN1/CTNNB1/SYT11/CANX/EPS15/CSPG5/ACTG1/RAB5A/GRIN3A	31
CC	GO:0043197	dendritic spine	31/1131	64/5894	1.01885e-07	1.10414e-06	7.78163e-07	GPM6A/NLGN1/KCND2/GRID2/ZNF804A/GRIA4/NRGN/DNM2/FUS/MT3/DNM3/SRGAP2/CRYAB/CTTNBP2/LAMA2/OPHN1/GIPC1/PDE4B/GRM3/STX4/HIP1R/TENM2/SLC8A1/SYT11/CANX/ASIC2/SYNDIG1/CYFIP1/DNAJB1/DOCK10/ADAM10	31
BP	GO:0043484	regulation of RNA splicing	29/1100	54/5658	1.8423e-08	1.37942e-06	1.2626e-06	CIRBP/SNRNP70/CELF2/KHDRBS3/HSPA1A/MBNL1/SON/FUS/DDX5/SRSF2/TMBIM6/HNRNPK/HNRNPU/HNRNPA2B1/MBNL2/RBMX/SFSWAP/DAZAP1/RBFOX1/PTBP1/RBM19/RPS13/CLK1/SRSF6/RBM4B/RBM22/YTHDC1/TRA2A/ZNF326	29
CC	GO:0005924	cell-substrate adherens junction	77/1131	231/5894	1.41265e-07	1.46287e-06	1.03098e-06	RPS15/HSPB1/RPL8/CFL1/HSPA8/HSPA1A/RPL37A/SORBS1/RPL18/DNM2/RPL31/RPS9/AKAP12/RPL38/HSPA1B/GAK/SVIL/RPLP2/RPS18/ACTB/ITGB8/ALCAM/LRP1/RPS29/CDH13/ARHGAP22/RPS4X/MARCKS/LIMS2/HNRNPK/NRP1/PPIA/RPS19/RPLP1/CTNNA1/NEDD9/RPS8/PALLD/RPS17/IQGAP1/EPB41L2/FAM107A/ADD1/RPL19/HSPA5/PFN1/RPL30/GDI2/RPL27/LIMS1/AFAP1/RPS13/RPS16/PPFIA1/CTNNB1/B2M/RPS3/SDCBP/RPL23/BSG/ZFYVE21/DLC1/RPS2/RPS11/CD46/CYFIP1/YWHAE…	77
CC	GO:0005925	focal adhesion	77/1131	231/5894	1.41265e-07	1.46287e-06	1.03098e-06	RPS15/HSPB1/RPL8/CFL1/HSPA8/HSPA1A/RPL37A/SORBS1/RPL18/DNM2/RPL31/RPS9/AKAP12/RPL38/HSPA1B/GAK/SVIL/RPLP2/RPS18/ACTB/ITGB8/ALCAM/LRP1/RPS29/CDH13/ARHGAP22/RPS4X/MARCKS/LIMS2/HNRNPK/NRP1/PPIA/RPS19/RPLP1/CTNNA1/NEDD9/RPS8/PALLD/RPS17/IQGAP1/EPB41L2/FAM107A/ADD1/RPL19/HSPA5/PFN1/RPL30/GDI2/RPL27/LIMS1/AFAP1/RPS13/RPS16/PPFIA1/CTNNB1/B2M/RPS3/SDCBP/RPL23/BSG/ZFYVE21/DLC1/RPS2/RPS11/CD46/CYFIP1/YWHAE…	77
CC	GO:0044309	neuron spine	31/1131	65/5894	1.59506e-07	1.61586e-06	1.13881e-06	GPM6A/NLGN1/KCND2/GRID2/ZNF804A/GRIA4/NRGN/DNM2/FUS/MT3/DNM3/SRGAP2/CRYAB/CTTNBP2/LAMA2/OPHN1/GIPC1/PDE4B/GRM3/STX4/HIP1R/TENM2/SLC8A1/SYT11/CANX/ASIC2/SYNDIG1/CYFIP1/DNAJB1/DOCK10/ADAM10	31
CC	GO:0030055	cell-substrate junction	77/1131	232/5894	1.72996e-07	1.71524e-06	1.20884e-06	RPS15/HSPB1/RPL8/CFL1/HSPA8/HSPA1A/RPL37A/SORBS1/RPL18/DNM2/RPL31/RPS9/AKAP12/RPL38/HSPA1B/GAK/SVIL/RPLP2/RPS18/ACTB/ITGB8/ALCAM/LRP1/RPS29/CDH13/ARHGAP22/RPS4X/MARCKS/LIMS2/HNRNPK/NRP1/PPIA/RPS19/RPLP1/CTNNA1/NEDD9/RPS8/PALLD/RPS17/IQGAP1/EPB41L2/FAM107A/ADD1/RPL19/HSPA5/PFN1/RPL30/GDI2/RPL27/LIMS1/AFAP1/RPS13/RPS16/PPFIA1/CTNNB1/B2M/RPS3/SDCBP/RPL23/BSG/ZFYVE21/DLC1/RPS2/RPS11/CD46/CYFIP1/YWHAE…	77
BP	GO:0036465	synaptic vesicle recycling	19/1100	28/5658	3.0625e-08	2.25282e-06	2.06203e-06	SLC17A7/NLGN1/SYT1/NLGN4Y/DNM2/GAK/ACTB/DNAJC6/DNM3/FGF14/NLGN4X/OPHN1/LRRK2/SYT17/SYT11/CANX/CYFIP1/ACTG1/RAB5A	19
BP	GO:0007416	synapse assembly	31/1100	61/5658	3.3222e-08	2.40172e-06	2.19832e-06	GPM6A/NRXN1/NLGN1/ROBO2/ERBB4/GRID2/CNTN5/PTPRD/KIRREL3/LINGO2/NLGN4Y/NRG1/SDK1/GABRA2/IL1RAPL1/CDH9/DNM3/IL1RAPL2/PCDH17/CBLN2/NLGN4X/EPHB1/SPOCK2/DSCAM/CLSTN2/ASIC2/SYNDIG1/NTN1/MEF2C/IL1RAP/PLXNB2	31
BP	GO:0016032	viral process	112/1100	362/5658	4.37873e-08	3.11187e-06	2.84832e-06	RPS15/RPL8/CFL1/RPL13/HSPA8/HSPA1A/RPS27A/ELMO1/RPL37A/RPL37/TSC2/CADM1/PACS2/RPL18/RPS6/UBB/LGALS1/RPL31/RPS9/DDX5/NFIA/RPS24/RPL38/HSPA1B/PCBP1/KAT2A/RPLP2/RPS18/UBXN1/SERINC5/VPS28/PCSK5/RPS23/RPS29/RPL28/RPL35/RPS4X/RPL24/SLC20A2/RPL32/POLR2L/TFRC/RPS25/NPC1/RPS28/ATF7IP/HNRNPK/UBC/RPS4Y1/PPIA/RPL29/RPS19/RPL11/RPLP1/TSPAN7/RPL41/RPS12/TGFB1/RPL27A/RPL36/RPS8/RPS17/RPS20/RPL10/IQGAP1/CHD1/EIF…	112
BP	GO:0050684	regulation of mRNA processing	28/1100	53/5658	5.21619e-08	3.64525e-06	3.33653e-06	CIRBP/SNRNP70/CELF2/KHDRBS3/MBNL1/SON/DDX5/SRSF2/SAFB2/HNRNPK/HNRNPU/HNRNPA2B1/MBNL2/ZFP36L1/RBMX/SFSWAP/DAZAP1/RBFOX1/NELFE/PTBP1/RBM19/SLTM/SRSF6/RBM4B/IWS1/HSF1/YTHDC1/TRA2A	28
BP	GO:0000375	RNA splicing, via transesterification reactions	54/1100	139/5658	6.26783e-08	4.30836e-06	3.94349e-06	CIRBP/SNRNP70/CELF2/KHDRBS3/HSPA8/MBNL1/SON/SRRM2/FUS/DDX5/LSM7/PCBP1/UPF3B/SRSF2/SRRM1/BCAS2/NOVA1/SF1/HNRNPM/PRPF4B/POLR2L/HNRNPK/DDX39A/HNRNPU/HNRNPA2B1/MBNL2/RBMX/UBL5/SRRT/SFSWAP/DAZAP1/POLR2F/RBFOX1/LSM2/HNRNPA3/PTBP1/RBM19/SNRPD2/SRSF6/POLR2J/RBM4B/PRPF6/RBM22/PRPF3/POLR2I/XAB2/YTHDC1/TRA2A/SF3B1/SCAF11/SF3B5/KHSRP/PCBP2/PUF60	54
BP	GO:0010769	regulation of cell morphogenesis involved in differentiation	50/1100	125/5658	6.51461e-08	4.40577e-06	4.03264e-06	CFL1/NLGN1/ROBO2/PTPRD/ZEB2/DNM2/DCC/SEMA6D/CHN1/IL1RAPL1/SLIT2/MT3/LRRC4C/LRP1/DNM3/IFRD1/NSMF/LIMS2/NRP1/UST/NEDD9/SRCIN1/LRRK2/APOE/DSCAM/PSEN1/POU3F2/LIMS1/DAB1/ZSWIM8/CIB1/TNIK/STK11/TNR/ZSWIM6/CYFIP1/CSPG5/KANK1/TRAK1/ANAPC2/SEMA3E/NTN1/SEMA5A/ROBO1/ADAM10/KIF13B/PLXNB2/DOCK1/PLXNA3/ACTN4	50
BP	GO:0048024	regulation of mRNA splicing, via spliceosome	22/1100	37/5658	8.63264e-08	5.7455e-06	5.25891e-06	CIRBP/SNRNP70/CELF2/KHDRBS3/MBNL1/SON/DDX5/SRSF2/HNRNPK/HNRNPU/HNRNPA2B1/MBNL2/RBMX/SFSWAP/DAZAP1/RBFOX1/PTBP1/RBM19/SRSF6/RBM4B/YTHDC1/TRA2A	22
CC	GO:0048786	presynaptic active zone	15/1131	22/5894	7.08828e-07	6.88154e-06	4.84987e-06	SLC17A7/GPM6A/NRXN1/GRM7/CDH10/ATP2B4/NTNG1/CTBP2/UNC13C/STX4/ADCY8/PPFIA1/CTNNB1/SYT11/CANX	15
BP	GO:0016358	dendrite development	39/1100	89/5658	1.06699e-07	6.99046e-06	6.39844e-06	CSMD3/CFL1/NLGN1/PTPRD/MEF2A/DCC/SDK1/IL1RAPL1/GRIP1/DNM3/SRGAP2/NSMF/NRP1/COBL/SRCIN1/EPHB1/IQGAP1/LRRK2/KLF7/APOE/DSCAM/SRGAP2C/MINK1/PSEN1/DAB1/ABI1/PRKG1/TNIK/STK11/CYFIP1/DOCK10/TRAK1/ANAPC2/NTN1/MEF2C/ADAM10/GRIN3A/ZNF365/BTBD3	39
BP	GO:0000377	RNA splicing, via transesterification reactions with bulged adenosine as nucleophile	53/1100	138/5658	1.29726e-07	8.24154e-06	7.54356e-06	CIRBP/SNRNP70/CELF2/KHDRBS3/HSPA8/MBNL1/SON/SRRM2/FUS/DDX5/LSM7/PCBP1/UPF3B/SRSF2/SRRM1/BCAS2/NOVA1/SF1/HNRNPM/PRPF4B/POLR2L/HNRNPK/DDX39A/HNRNPU/HNRNPA2B1/MBNL2/RBMX/UBL5/SRRT/SFSWAP/DAZAP1/POLR2F/RBFOX1/LSM2/HNRNPA3/PTBP1/RBM19/SNRPD2/SRSF6/POLR2J/RBM4B/PRPF6/RBM22/PRPF3/POLR2I/XAB2/YTHDC1/TRA2A/SF3B1/SCAF11/SF3B5/PCBP2/PUF60	53
BP	GO:0000398	mRNA splicing, via spliceosome	53/1100	138/5658	1.29726e-07	8.24154e-06	7.54356e-06	CIRBP/SNRNP70/CELF2/KHDRBS3/HSPA8/MBNL1/SON/SRRM2/FUS/DDX5/LSM7/PCBP1/UPF3B/SRSF2/SRRM1/BCAS2/NOVA1/SF1/HNRNPM/PRPF4B/POLR2L/HNRNPK/DDX39A/HNRNPU/HNRNPA2B1/MBNL2/RBMX/UBL5/SRRT/SFSWAP/DAZAP1/POLR2F/RBFOX1/LSM2/HNRNPA3/PTBP1/RBM19/SNRPD2/SRSF6/POLR2J/RBM4B/PRPF6/RBM22/PRPF3/POLR2I/XAB2/YTHDC1/TRA2A/SF3B1/SCAF11/SF3B5/PCBP2/PUF60	53
BP	GO:0007411	axon guidance	48/1100	121/5658	1.61949e-07	9.98608e-06	9.14036e-06	NRXN1/ROBO2/CNTN4/UNC5D/EPHA6/NRXN3/PRKCA/NFIB/DCC/SEMA6D/APBB2/CHN1/IRS2/DSCAML1/SLIT2/ALCAM/LRP1/RPL24/BMPR1B/UNC5C/LAMA2/NRP1/OPHN1/PALLD/ETV1/EPHB1/NTNG1/KLF7/DSCAM/PTPRM/GAB1/DAB1/ZSWIM8/BSG/TNR/ZSWIM6/CYFIP1/FEZ1/PLCG1/SEMA3E/NEO1/DOK5/NTN1/RPS6KA5/SEMA5A/ROBO1/PLXNB2/PLXNA3	48
BP	GO:0097485	neuron projection guidance	48/1100	121/5658	1.61949e-07	9.98608e-06	9.14036e-06	NRXN1/ROBO2/CNTN4/UNC5D/EPHA6/NRXN3/PRKCA/NFIB/DCC/SEMA6D/APBB2/CHN1/IRS2/DSCAML1/SLIT2/ALCAM/LRP1/RPL24/BMPR1B/UNC5C/LAMA2/NRP1/OPHN1/PALLD/ETV1/EPHB1/NTNG1/KLF7/DSCAM/PTPRM/GAB1/DAB1/ZSWIM8/BSG/TNR/ZSWIM6/CYFIP1/FEZ1/PLCG1/SEMA3E/NEO1/DOK5/NTN1/RPS6KA5/SEMA5A/ROBO1/PLXNB2/PLXNA3	48
BP	GO:0048488	synaptic vesicle endocytosis	16/1100	23/5658	2.32076e-07	1.39014e-05	1.27241e-05	SLC17A7/NLGN1/SYT1/NLGN4Y/DNM2/GAK/ACTB/DNAJC6/DNM3/NLGN4X/OPHN1/LRRK2/SYT17/SYT11/CANX/ACTG1	16
BP	GO:0140238	presynaptic endocytosis	16/1100	23/5658	2.32076e-07	1.39014e-05	1.27241e-05	SLC17A7/NLGN1/SYT1/NLGN4Y/DNM2/GAK/ACTB/DNAJC6/DNM3/NLGN4X/OPHN1/LRRK2/SYT17/SYT11/CANX/ACTG1	16
BP	GO:0044403	symbiont process	112/1100	374/5658	2.98311e-07	1.74396e-05	1.59626e-05	RPS15/RPL8/CFL1/RPL13/HSPA8/HSPA1A/RPS27A/ELMO1/RPL37A/RPL37/TSC2/CADM1/PACS2/RPL18/RPS6/UBB/LGALS1/RPL31/RPS9/DDX5/NFIA/RPS24/RPL38/HSPA1B/PCBP1/KAT2A/RPLP2/RPS18/UBXN1/SERINC5/VPS28/PCSK5/RPS23/RPS29/RPL28/RPL35/RPS4X/RPL24/SLC20A2/RPL32/POLR2L/TFRC/RPS25/NPC1/RPS28/ATF7IP/HNRNPK/UBC/RPS4Y1/PPIA/RPL29/RPS19/RPL11/RPLP1/TSPAN7/RPL41/RPS12/TGFB1/RPL27A/RPL36/RPS8/RPS17/RPS20/RPL10/IQGAP1/CHD1/EIF…	112
BP	GO:0010975	regulation of neuron projection development	69/1100	201/5658	2.99463e-07	1.74396e-05	1.59626e-05	CSMD3/CFL1/NLGN1/ROBO2/GRID2/ZNF804A/SYT1/PTPRD/TENM3/CNR1/ZEB2/LGALS1/DNM2/ACAP3/DCC/SEMA6D/ITM2C/GAK/CHN1/SDK1/IL1RAPL1/SLIT2/GRIP1/MT3/LRRC4C/LRP1/DNM3/IFRD1/PTPRG/NSMF/NRP1/COBL/UST/SRCIN1/DENND5A/IQGAP1/LRRK2/APOE/SYT17/DSCAM/SRGAP2C/HSPA5/PSEN1/POU3F2/DAB1/ZSWIM8/CIB1/B2M/RAPGEF1/TNIK/STK11/TNR/ZSWIM6/CYFIP1/KANK1/TRAK1/FEZ1/ANAPC2/SPOCK1/SEMA3E/NTN1/MEF2C/SEMA5A/ROBO1/ADAM10/KIF13B/PLXNB2/…	69
CC	GO:0099055	integral component of postsynaptic membrane	20/1131	37/5894	2.19753e-06	2.0899e-05	1.47289e-05	NLGN1/KCND2/ERBB4/GRID2/SORCS3/DCC/CHRM3/GRID1/CDH10/CDH9/LRRC4C/PCDH17/GRIK4/NRP1/GRM3/CLSTN2/SLC8A1/CANX/SLC6A9/CSPG5	20
CC	GO:0098685	Schaffer collateral - CA1 synapse	15/1131	25/5894	7.57678e-06	7.06156e-05	4.97675e-05	NRXN1/DCC/AKAP12/ACTB/LRRC4C/GIPC1/NTNG1/ADCY8/CTNNB1/SYT11/TNR/DGKB/PLCG1/STAT3/ACTG1	15
BP	GO:0007420	brain development	94/1100	309/5658	1.34176e-06	7.70684e-05	7.05415e-05	CNTNAP2/SLC17A7/ROBO2/CKB/CNTN4/NRG3/STMN1/ERBB4/GRID2/SYT1/KIRREL3/UBB/ZEB2/NRGN/KCNC2/NFIB/BPTF/SEMA6D/DCLK2/PLP1/NRG1/KAT2A/GNAO1/IRS2/KCNAB1/MYO1D/DSCAML1/CDK5RAP3/SLIT2/HMGCS1/MT3/ACTB/LRP1/ATP2B4/SRGAP2/NLGN4X/PTPRG/CDK5RAP2/UNC5C/CTTNBP2/NRP1/OPHN1/SIRT2/ROGDI/AGTPBP1/SEZ6L/LRRK2/FOXO3/RBPJ/SLC1A2/ATM/SRGAP2C/HSPA5/CA10/PSEN1/FABP7/RFX4/POU3F2/DAB1/PRKG1/RORA/SLC8A1/SYNJ2/CTNNB1/SZT2/B2M/C…	94
CC	GO:0015630	microtubule cytoskeleton	107/1131	382/5894	9.59735e-06	8.76934e-05	6.18034e-05	HSPB1/TUBB4A/HSPA1A/STMN1/CLIP2/SORBS1/ZNF804A/TUBB2A/TPPP/KIF26B/PKP4/PSRC1/SS18/DNM2/NAV1/TUBA1A/DCLK2/SNCG/KLHL4/HSPH1/HSPA1B/SVIL/KAT2A/UPF3B/PLEKHA7/TPT1/INVS/BCAS2/CDK5RAP3/MT3/PCGF5/TTC28/GNAI1/CDC14B/SPPL2B/DNM3/NCKAP5/SHROOM3/CRYAB/CDK5RAP2/MARCKS/CEP350/ATF4/PXK/STAG1/EML2/APC2/HNRNPU/PKD2/POC1B/NEDD9/PDE4B/TUBA1B/SIRT2/CHD4/ABCA2/IQGAP1/OFD1/REEP3/SPAG9/MAD1L1/CDC16/DYNC1LI2/TTLL3/ATM/…	107
BP	GO:0002181	cytoplasmic translation	21/1100	39/5658	1.655e-06	9.3776e-05	8.58341e-05	RPL8/RPL18/RPL31/RPL38/RPS23/RPS29/RPL24/RPL32/CPEB2/RPS28/EIF2S2/RPL29/RPL11/RPLP1/RPL41/RPL36/EIF3G/RPL19/RPSA/RPL30/EIF3E	21
CC	GO:0098936	intrinsic component of postsynaptic membrane	20/1131	40/5894	1.05496e-05	9.45408e-05	6.66291e-05	NLGN1/KCND2/ERBB4/GRID2/SORCS3/DCC/CHRM3/GRID1/CDH10/CDH9/LRRC4C/PCDH17/GRIK4/NRP1/GRM3/CLSTN2/SLC8A1/CANX/SLC6A9/CSPG5	20
BP	GO:0044419	interspecies interaction between organisms	112/1100	386/5658	1.71862e-06	9.60826e-05	8.79453e-05	RPS15/RPL8/CFL1/RPL13/HSPA8/HSPA1A/RPS27A/ELMO1/RPL37A/RPL37/TSC2/CADM1/PACS2/RPL18/RPS6/UBB/LGALS1/RPL31/RPS9/DDX5/NFIA/RPS24/RPL38/HSPA1B/PCBP1/KAT2A/RPLP2/RPS18/UBXN1/SERINC5/VPS28/PCSK5/RPS23/RPS29/RPL28/RPL35/RPS4X/RPL24/SLC20A2/RPL32/POLR2L/TFRC/RPS25/NPC1/RPS28/ATF7IP/HNRNPK/UBC/RPS4Y1/PPIA/RPL29/RPS19/RPL11/RPLP1/TSPAN7/RPL41/RPS12/TGFB1/RPL27A/RPL36/RPS8/RPS17/RPS20/RPL10/IQGAP1/CHD1/EIF…	112
CC	GO:0005874	microtubule	48/1131	141/5894	1.76954e-05	0.000155586	0.000109652	TUBB4A/STMN1/CLIP2/ZNF804A/TUBB2A/TPPP/KIF26B/PSRC1/SS18/DNM2/NAV1/TUBA1A/DCLK2/HSPH1/SVIL/TPT1/INVS/CDK5RAP3/MT3/DNM3/NCKAP5/SHROOM3/CDK5RAP2/EML2/APC2/HNRNPU/TUBA1B/SIRT2/IQGAP1/REEP3/CDC16/DYNC1LI2/TTLL3/EML4/KIFC3/SLC8A1/MAP4/MAP7/KIF6/CEP162/FEZ1/KIF2A/FIGN/KATNAL2/DNAH17/TBCB/DNAH12/KIF13B	48
BP	GO:0031345	negative regulation of cell projection organization	34/1100	82/5658	3.26025e-06	0.000179871	0.000164638	PRNP/NLGN1/CAPZB/LGALS1/DNM2/DCC/SEMA6D/ITM2C/GAK/SLIT2/MT3/LRP1/DNM3/IFRD1/PTPRG/NRP1/DENND5A/EVI5L/LRRK2/APOE/SRGAP2C/PSEN1/DAB1/CIB1/B2M/MAP4/TNR/KANK1/SPOCK1/SEMA3E/NTN1/SEMA5A/PLXNA3/ZNF365	34
CC	GO:0098982	GABA-ergic synapse	14/1131	24/5894	2.41527e-05	0.000208429	0.000146894	NRXN1/GABRB1/KCND2/ERBB4/CNTN5/CNR1/NLGN4Y/NRG1/CDH10/PCDH17/CDH13/NLGN4X/CTBP2/CSPG5	14
BP	GO:0050770	regulation of axonogenesis	32/1100	76/5658	4.27199e-06	0.000232629	0.000212928	ROBO2/ZEB2/DNM2/DCC/SEMA6D/CHN1/SLIT2/MT3/LRRC4C/LRP1/IFRD1/NRP1/UST/APOE/DSCAM/PSEN1/POU3F2/DAB1/ZSWIM8/STK11/TNR/ZSWIM6/CYFIP1/TRAK1/ANAPC2/SEMA3E/NTN1/SEMA5A/ROBO1/KIF13B/PLXNB2/PLXNA3	32
BP	GO:0097479	synaptic vesicle localization	22/1100	44/5658	4.75895e-06	0.000255824	0.000234159	NLGN1/SYT1/CNR1/DNM2/CACNB2/DNM3/PCDH17/SPG11/GIPC1/LRRK2/CADPS2/SYT17/CTBP2/UNC13C/STX4/PSEN1/CTNNB1/SYT11/SYNDIG1/CSPG5/RAB5A/GRIN3A	22
BP	GO:0022604	regulation of cell morphogenesis	68/1100	212/5658	5.77389e-06	0.000306455	0.000280501	CFL1/NLGN1/ROBO2/FMNL2/CAPZB/ALDOA/SYT1/PTPRD/ZEB2/DNM2/DCC/SEMA6D/CHN1/IL1RAPL1/SLIT2/GRIP1/MT3/LRRC4C/LRP1/ZNF135/DNM3/IFRD1/SHROOM3/NSMF/STRIP2/LIMS2/NRP1/UST/NEDD9/SRCIN1/LRRK2/SH3D19/APOE/SYT17/DSCAM/PSEN1/POU3F2/LIMS1/DAB1/ZSWIM8/MYH14/ATP10A/CIB1/FGD6/DLC1/TNIK/STK11/TNR/ZSWIM6/CYFIP1/CSPG5/KANK1/TRAK1/ANAPC2/RHOBTB3/SEMA3E/NTN1/SPARC/SEMA5A/ROBO1/ADAM10/KIF13B/PLXNB2/FAM171A1/DOCK1/PLXNA3…	68
CC	GO:0098590	plasma membrane region	127/1131	482/5894	3.65713e-05	0.000309858	0.000218378	CAMK2N1/CNTNAP2/GPM6A/NRXN1/CFL1/NLGN1/ROBO2/GABRB1/KCND2/ERBB4/GRM7/GRID2/CNTN5/SYT1/CADM1/LRRTM4/CNR1/SORCS3/NLGN4Y/GRIA4/GNAS/NRGN/DNM2/KCNC2/HIP1/DCC/CHRM3/ATP1B1/MYO6/SVIL/TF/GRID1/GABRA2/MYO1D/EEF1A1/IL1RAPL1/GRIK1/GRIP1/CDH10/SLC4A7/CDH9/LRRC4C/ABCB1/LRP1/ATP2B4/MYLK/DNM3/PCDH17/CDH13/KCTD8/SRGAP2/NLGN4X/GRIK4/SHROOM3/CRYAB/GRM8/NSMF/TFRC/TTYH1/ARHGEF4/ATF4/NRP1/SNTG1/GRIK2/APC2/PKD2/CTNNA…	127
MF	GO:0008092	cytoskeletal protein binding	110/1089	379/5628	1.65315e-06	0.000326774	0.000293507	PRNP/TMSB4X/ENC1/CFL1/TMSB10/FMNL2/CALD1/STMN1/GABARAPL2/CLIP2/SORBS1/CAPZB/ALDOA/CDH12/TPPP/KIF26B/PSRC1/DNM2/FUS/HIP1/KLHL4/HSPH1/MYO6/SVIL/CACNB2/CAMK2D/MYO1D/CDH10/CDH9/ACTB/HSP90AA1/S100A6/MYLK/DNM3/CDH13/STMN4/CLU/SHROOM3/CRYAB/MICALL2/CDK5RAP2/UNC5C/MARCKS/CEP350/SPATA6/OPHN1/PXK/SNTG1/COBL/EML2/GIPC1/APC2/HNRNPU/ABLIM1/PKD2/DIAPH2/CTNNA1/PDE4B/FRMD5/MYO9B/RTCB/AGTPBP1/PALLD/VASH1/LRRK2/CT…	110
CC	GO:0060076	excitatory synapse	14/1131	25/5894	4.52494e-05	0.000376539	0.000265372	SLC17A7/NLGN1/GRID2/SYT1/NLGN4Y/NLGN4X/PDE4B/CADPS2/UNC13C/ADCY8/SYT11/SLC6A9/SYNDIG1/CYFIP1	14
BP	GO:0035249	synaptic transmission, glutamatergic	20/1100	39/5658	7.8824e-06	0.000412812	0.000377851	SLC17A7/NRXN1/NLGN1/GRM7/GRID2/SYT1/CNR1/GRID1/GRIK1/GRIK4/GRM8/OPHN1/GRIK2/LRRK2/GRM3/UNC13C/PSEN1/SERPINE2/TNR/MEF2C	20
BP	GO:0051961	negative regulation of nervous system development	52/1100	151/5658	7.97466e-06	0.000412812	0.000377851	NLGN1/ROBO2/CNTN4/NRG3/ERBB4/LGALS1/DCC/SEMA6D/ITM2C/GAK/NRG1/SLIT2/MT3/LRP1/DNM3/IFRD1/SRGAP2/PTPRG/CDK5RAP2/NRP1/CTNNA1/TGFB1/SIRT2/DENND5A/LRRK2/GPR173/LDLR/FOXO3/APOE/SORL1/SOX9/SRGAP2C/DTX1/PSEN1/RFX4/DAB1/CTNNB1/CIB1/B2M/TNR/ZNF536/BMPR1A/KANK1/SPOCK1/DICER1/SEMA3E/ID2/STAT3/NTN1/SEMA5A/PLXNA3/ZNF365	52
BP	GO:0050803	regulation of synapse structure or activity	34/1100	85/5658	8.42229e-06	0.000430667	0.000394194	SLC17A7/GPM6A/PRNP/NRXN1/CFL1/NLGN1/ROBO2/GRID2/ZNF804A/PTPRD/LINGO2/DNM2/TUBA1A/IL1RAPL1/DNM3/IL1RAPL2/CBLN2/ARHGAP22/CTTNBP2/SRCIN1/EPHB1/LRRK2/APOE/CLSTN2/ASIC2/SYNDIG1/CYFIP1/DGKB/ANAPC2/NTN1/SPARC/MEF2C/ADAM10/IL1RAP	34
BP	GO:0072583	clathrin-dependent endocytosis	11/1100	15/5658	9.04565e-06	0.000456969	0.000418268	DNM2/HIP1/GAK/DNAJC6/TNK2/SH3GL3/HIP1R/FCHO1/SYT11/CANX/FCHSD2	11
BP	GO:0050768	negative regulation of neurogenesis	50/1100	144/5658	9.16576e-06	0.000457524	0.000418776	NLGN1/CNTN4/NRG3/ERBB4/LGALS1/DCC/SEMA6D/ITM2C/GAK/NRG1/SLIT2/MT3/LRP1/DNM3/IFRD1/SRGAP2/PTPRG/CDK5RAP2/NRP1/CTNNA1/TGFB1/SIRT2/DENND5A/LRRK2/GPR173/LDLR/FOXO3/APOE/SORL1/SOX9/SRGAP2C/DTX1/PSEN1/DAB1/CTNNB1/CIB1/B2M/TNR/ZNF536/BMPR1A/KANK1/SPOCK1/DICER1/SEMA3E/ID2/STAT3/NTN1/SEMA5A/PLXNA3/ZNF365	50
BP	GO:0034622	cellular protein-containing complex assembly	91/1100	310/5658	1.02824e-05	0.000507223	0.000464266	RPS15/CIRBP/TMSB4X/CELF2/TUBB4A/TMSB10/HSPA1A/NRG3/LDLRAD4/RPS27A/STMN1/CAPZB/TPPP/UBB/PSRC1/HIP1/RPL38/HSPA1B/NRG1/PIK3C2A/SLIT2/HSP90AA1/RPS23/SF1/RPL24/CLU/CRYAB/MICALL2/HP1BP3/CDK5RAP2/RPS28/ATF7IP/UBC/COBL/TAZ/EIF2S2/EML2/RPS19/RPL11/TGFB1/SIRT2/RPL10/EIF3G/FAM107A/CADPS2/ADD1/MIS18BP1/RBMX/SOX9/ATM/STXBP6/SFSWAP/UNC13C/RPSA/PFN1/STX4/NASP/ADD3/HIP1R/RPL23A/NAP1L4/RHOBTB1/UBA52/FCHO1/WASH3P/…	91
BP	GO:0007417	central nervous system development	121/1100	440/5658	1.21617e-05	0.000592953	0.000542736	CNTNAP2/SLC17A7/ROBO2/CKB/CNTN4/NRG3/GABRB1/STMN1/ERBB4/GRID2/UNC5D/SYT1/KIRREL3/UBB/ZEB2/NRGN/KCNC2/NFIB/DCC/BPTF/SEMA6D/DCLK2/PLP1/NRG1/KAT2A/GNAO1/IRS2/KCNAB1/MYO1D/DSCAML1/CDK5RAP3/SLIT2/NAV2/GRIK1/HMGCS1/MT3/PAM/ACTB/HSP90AA1/LRP1/ATP2B4/IL1RAPL2/SRGAP2/POU6F2/NLGN4X/CLU/PTPRG/CDK5RAP2/UNC5C/CTTNBP2/NRP1/OPHN1/PKD2/TGFB1/SIRT2/ROGDI/PTPRZ1/AGTPBP1/SEZ6L/NCAN/EPHB1/LRRK2/LDLR/SH3GL3/FOXO3/RBP…	121
BP	GO:0051960	regulation of nervous system development	114/1100	410/5658	1.28654e-05	0.000608355	0.000556834	BRINP3/CSMD3/NRXN1/CFL1/NLGN1/ROBO2/CNTN4/NRG3/ERBB4/GRID2/ZNF804A/UNC5D/SYT1/PTPRD/TENM3/CNR1/LINGO2/ZEB2/LGALS1/DNM2/ACAP3/DCC/PCP4/SEMA6D/ITM2C/GAK/NRG1/CHN1/SDK1/IL1RAPL1/CDK5RAP3/SLIT2/LGI4/GRIP1/MT3/LRRC4C/LRP1/DNM3/IL1RAPL2/CBLN2/IFRD1/SRGAP2/PTPRG/NSMF/CDK5RAP2/NRP1/COBL/CTNNA1/UST/TGFB1/SRCIN1/SIRT2/DENND5A/PTPRZ1/EPHB1/IQGAP1/LRRK2/GPR173/LDLR/SPAG9/SH3GL3/FOXO3/APOE/SORL1/SOX9/SRRT/SYT…	114
BP	GO:0048489	synaptic vesicle transport	20/1100	40/5658	1.29129e-05	0.000608355	0.000556834	NLGN1/SYT1/CNR1/DNM2/CACNB2/DNM3/SPG11/GIPC1/LRRK2/CADPS2/SYT17/CTBP2/UNC13C/STX4/PSEN1/CTNNB1/SYT11/CSPG5/RAB5A/GRIN3A	20
BP	GO:0097480	establishment of synaptic vesicle localization	20/1100	40/5658	1.29129e-05	0.000608355	0.000556834	NLGN1/SYT1/CNR1/DNM2/CACNB2/DNM3/SPG11/GIPC1/LRRK2/CADPS2/SYT17/CTBP2/UNC13C/STX4/PSEN1/CTNNB1/SYT11/CSPG5/RAB5A/GRIN3A	20
BP	GO:0060322	head development	96/1100	333/5658	1.3358e-05	0.000622333	0.000569628	CNTNAP2/SLC17A7/ROBO2/CKB/CNTN4/NRG3/STMN1/ERBB4/GRID2/SYT1/KIRREL3/UBB/ZEB2/NRGN/KCNC2/NFIB/BPTF/SEMA6D/DCLK2/PLP1/NRG1/KAT2A/GNAO1/IRS2/KCNAB1/MYO1D/DSCAML1/CDK5RAP3/SLIT2/HMGCS1/MT3/ACTB/LRP1/ATP2B4/SRGAP2/NLGN4X/PTPRG/CDK5RAP2/UNC5C/CTTNBP2/NRP1/OPHN1/TGFB1/SIRT2/ROGDI/AGTPBP1/SEZ6L/LRRK2/FOXO3/RBPJ/SLC1A2/SOX9/ATM/SRGAP2C/HSPA5/CA10/PSEN1/FABP7/RFX4/POU3F2/DAB1/PRKG1/RORA/SLC8A1/SYNJ2/CTNNB1…	96
BP	GO:0048167	regulation of synaptic plasticity	25/1100	56/5658	1.40936e-05	0.000649389	0.000594392	PRNP/NLGN1/CNTN4/GRID2/SORCS3/NRGN/KAT2A/SLC24A2/FGF14/NSMF/GRIK2/GIPC1/SQSTM1/FAM107A/APOE/UNC13C/STX4/ADCY8/PSEN1/SERPINE2/TNR/ANAPC2/MEF2C/SORCS2/RAB5A	25
BP	GO:0010977	negative regulation of neuron projection development	29/1100	70/5658	1.7464e-05	0.000795942	0.000728534	NLGN1/LGALS1/DCC/SEMA6D/ITM2C/GAK/SLIT2/MT3/LRP1/DNM3/IFRD1/PTPRG/NRP1/DENND5A/LRRK2/APOE/SRGAP2C/PSEN1/DAB1/CIB1/B2M/TNR/KANK1/SPOCK1/SEMA3E/NTN1/SEMA5A/PLXNA3/ZNF365	29
BP	GO:0099173	postsynapse organization	26/1100	60/5658	1.82871e-05	0.000820766	0.000751255	PRNP/NRXN1/CFL1/NLGN1/GRID2/ZNF804A/PTPRD/NLGN4Y/IL1RAPL1/ACTB/DNM3/ARHGAP22/NLGN4X/NRP1/OPHN1/SRCIN1/EPHB1/LRRK2/APOE/INSR/DGKB/DOCK10/ACTG1/ADAM10/IL1RAP/ZNF365	26
BP	GO:0007269	neurotransmitter secretion	22/1100	47/5658	1.84002e-05	0.000820766	0.000751255	NRXN1/NLGN1/HSPA8/SYT1/CNR1/SNCG/CACNB2/GIPC1/LRRK2/CADPS2/SYT17/CTBP2/UNC13C/STX4/PSEN1/PPFIA1/SYT11/SLC6A9/CSPG5/MEF2C/RAB5A/GRIN3A	22
BP	GO:0045664	regulation of neuron differentiation	82/1100	277/5658	2.03792e-05	0.000899474	0.000823298	BRINP3/CSMD3/CFL1/NLGN1/ROBO2/CNTN4/GRID2/ZNF804A/SYT1/PTPRD/TENM3/CNR1/ZEB2/LGALS1/DNM2/ACAP3/DCC/PCP4/SEMA6D/ITM2C/GAK/CHN1/SDK1/IL1RAPL1/CDK5RAP3/SLIT2/GRIP1/MT3/LRRC4C/LRP1/DNM3/IFRD1/PTPRG/NSMF/CDK5RAP2/NRP1/COBL/UST/SRCIN1/DENND5A/IQGAP1/LRRK2/SPAG9/SH3GL3/FOXO3/APOE/SOX9/SYT17/DSCAM/SRGAP2C/HSPA5/DTX1/PSEN1/MMD2/POU3F2/DAB1/ZSWIM8/CIB1/B2M/RAPGEF1/TNIK/STK11/TNR/ZSWIM6/ZNF536/CYFIP1/KANK1/…	82
BP	GO:0098742	cell-cell adhesion via plasma-membrane adhesion molecules	41/1100	114/5658	2.26581e-05	0.000989639	0.000905826	NRXN1/NLGN1/ROBO2/CNTN4/GRID2/PCDH9/UNC5D/PCDH7/CDH12/CADM1/PTPRD/TENM3/PCDH11Y/KIRREL3/SPARCL1/FAT3/SDK1/DSCAML1/IL1RAPL1/PCDH15/CDH10/CDH9/LRRC4C/ALCAM/PCDH17/CDH13/PALLD/PTPRT/NTNG1/CLDN11/DSCAM/PTPRM/CLSTN2/DAB1/TENM2/BSG/MBP/ROBO1/IL1RAP/PLXNB2/PCDH11X	41
BP	GO:0050767	regulation of neurogenesis	103/1100	368/5658	2.56658e-05	0.00110945	0.00101549	BRINP3/CSMD3/CFL1/NLGN1/ROBO2/CNTN4/NRG3/ERBB4/GRID2/ZNF804A/UNC5D/SYT1/PTPRD/TENM3/CNR1/ZEB2/LGALS1/DNM2/ACAP3/DCC/PCP4/SEMA6D/ITM2C/GAK/NRG1/CHN1/SDK1/IL1RAPL1/CDK5RAP3/SLIT2/GRIP1/MT3/LRRC4C/LRP1/DNM3/IFRD1/SRGAP2/PTPRG/NSMF/CDK5RAP2/NRP1/COBL/CTNNA1/UST/TGFB1/SRCIN1/SIRT2/DENND5A/PTPRZ1/IQGAP1/LRRK2/GPR173/LDLR/SPAG9/SH3GL3/FOXO3/APOE/SORL1/SOX9/SRRT/SYT17/DSCAM/SRGAP2C/HSPA5/DTX1/PSEN1/MAN2A…	103
BP	GO:0099643	signal release from synapse	22/1100	48/5658	2.78116e-05	0.00118532	0.00108494	NRXN1/NLGN1/HSPA8/SYT1/CNR1/SNCG/CACNB2/GIPC1/LRRK2/CADPS2/SYT17/CTBP2/UNC13C/STX4/PSEN1/PPFIA1/SYT11/SLC6A9/CSPG5/MEF2C/RAB5A/GRIN3A	22
BP	GO:0050807	regulation of synapse organization	32/1100	82/5658	2.79864e-05	0.00118532	0.00108494	GPM6A/PRNP/NRXN1/CFL1/NLGN1/ROBO2/GRID2/ZNF804A/PTPRD/LINGO2/TUBA1A/IL1RAPL1/DNM3/IL1RAPL2/CBLN2/ARHGAP22/CTTNBP2/SRCIN1/EPHB1/LRRK2/APOE/CLSTN2/ASIC2/SYNDIG1/CYFIP1/DGKB/ANAPC2/NTN1/SPARC/MEF2C/ADAM10/IL1RAP	32
CC	GO:0099568	cytoplasmic region	53/1131	173/5894	0.000168121	0.00136984	0.000965418	HSPB1/TUBB4A/CFL1/CALD1/GRM7/FNBP1/PLA2G4C/HIP1/AKAP12/MYO6/KCNAB1/MYO1D/EEF1A1/AKAP13/GNAI1/ACTB/ASTN2/SHROOM3/NSMF/MARCKS/CTTNBP2/GRIK2/COBL/GIPC1/HNRNPU/PKD2/NEDD9/FGF1/MYO9B/LRRK2/EPB41L2/TTLL3/STXBP6/CTBP2/UNC13C/PFN1/PSEN1/ADD3/HIP1R/CTNNB1/CANX/DLC1/MAP4/ENO1/CEP162/TRAK1/RHOBTB3/DNAH17/PARD3B/AKT2/ITPR2/ACTN4/WDR1	53
BP	GO:0060284	regulation of cell development	114/1100	418/5658	3.31705e-05	0.00139084	0.00127305	BRINP3/CSMD3/RFX3/CFL1/NLGN1/ROBO2/CNTN4/NRG3/ERBB4/GRID2/ZNF804A/UNC5D/SYT1/PTPRD/TENM3/CNR1/ZEB2/LGALS1/DNM2/ACAP3/DCC/PCP4/SEMA6D/ITM2C/GAK/NRG1/CHN1/SDK1/IL1RAPL1/AKAP13/CDK5RAP3/SLIT2/GRIP1/MT3/LRRC4C/LRP1/DNM3/HDAC9/IFRD1/SRGAP2/PTPRG/NSMF/CDK5RAP2/LIMS2/NRP1/COBL/RPS19/CTNNA1/UST/NEDD9/TGFB1/SRCIN1/SIRT2/DENND5A/PTPRZ1/IQGAP1/LRRK2/GPR173/LDLR/SPAG9/SH3GL3/FOXO3/APOE/ADD1/SORL1/SOX9/SRRT/S…	114
MF	GO:0008066	glutamate receptor activity	10/1089	13/5628	1.14556e-05	0.00169829	0.0015254	GRM7/GRID2/GRIA4/GRID1/GRIK1/GRIK4/GRM8/GRIK2/GRM3/GRIN3A	10
BP	GO:0008038	neuron recognition	13/1100	22/5658	4.55813e-05	0.0018753	0.00171648	CNTNAP2/ROBO2/CNTN4/CNR1/NCAM2/DSCAML1/NRP1/PALLD/DSCAM/BSG/OPCML/SEMA5A/ROBO1	13
BP	GO:1903311	regulation of mRNA metabolic process	41/1100	117/5658	4.56191e-05	0.0018753	0.00171648	HSPB1/CIRBP/SNRNP70/CELF2/KHDRBS3/HSPA8/HSPA1A/MBNL1/RPS27A/SON/UBB/PRKCA/DDX5/SRSF2/PSME4/HNRNPM/SAFB2/HNRNPK/UBC/HNRNPU/HNRNPA2B1/MBNL2/ZFP36L1/RBMX/SFSWAP/DAZAP1/RBFOX1/NELFE/PTBP1/RBM19/ANP32A/UBA52/SLTM/SRSF6/RBM4B/IWS1/HSF1/YTHDC1/TRA2A/CNOT1/KHSRP	41
CC	GO:0031966	mitochondrial membrane	29/1131	80/5894	0.000239055	0.00188813	0.00133069	RPS27A/CNR1/UBB/IFI27L2/NRGN/PRKCA/PNPLA7/PPP2R2B/AGPAT4/MT3/ANKZF1/TMBIM6/CLU/UBC/TAZ/LRRK2/TIMM23B/FOXO3/PSEN1/UBA52/RPS3/SLC27A1/TRAK1/ACSL3/UQCC3/STAT3/LPIN1/RNF5/STARD13	29
CC	GO:0071013	catalytic step 2 spliceosome	18/1131	41/5894	0.000245682	0.00190813	0.00134478	SRRM2/DDX5/LSM7/SRRM1/BCAS2/HNRNPM/PRPF4B/HNRNPK/HNRNPU/HNRNPA2B1/RBMX/LSM2/HNRNPA3/SNRPD2/PRPF6/RBM22/XAB2/SF3B1	18
CC	GO:0005740	mitochondrial envelope	30/1131	84/5894	0.000254175	0.00194173	0.00136847	RPS27A/CNR1/UBB/IFI27L2/NRGN/PRKCA/PNPLA7/PPP2R2B/AGPAT4/MT3/ANKZF1/TMBIM6/CLU/UBC/TAZ/LRRK2/TIMM23B/FOXO3/PSEN1/UBA52/RPS3/SLC27A1/TRAK1/ACSL3/UQCC3/ADAP2/STAT3/LPIN1/RNF5/STARD13	30
BP	GO:0048813	dendrite morphogenesis	23/1100	53/5658	5.3826e-05	0.00219119	0.00200562	CFL1/NLGN1/PTPRD/MEF2A/IL1RAPL1/DNM3/NSMF/NRP1/SRCIN1/EPHB1/LRRK2/KLF7/DSCAM/MINK1/ABI1/TNIK/STK11/DOCK10/TRAK1/ANAPC2/ADAM10/ZNF365/BTBD3	23
BP	GO:0071277	cellular response to calcium ion	17/1100	34/5658	5.80376e-05	0.00233357	0.00213594	JUND/NLGN1/RYR3/SYT1/MEF2A/FUS/CAMK2D/FOSB/PKD2/IQGAP1/JUNB/ADD1/SYT17/HSPA5/ADCY8/SYT11/MEF2C	17
BP	GO:0016079	synaptic vesicle exocytosis	16/1100	31/5658	5.84366e-05	0.00233357	0.00213594	NLGN1/SYT1/CNR1/CACNB2/GIPC1/LRRK2/CADPS2/SYT17/CTBP2/UNC13C/STX4/PSEN1/SYT11/CSPG5/RAB5A/GRIN3A	16
MF	GO:0030554	adenyl nucleotide binding	127/1089	473/5628	2.02358e-05	0.00234279	0.00210429	PEBP1/HSPA8/CKB/SIK3/HSPA1A/ERBB4/EPHA6/TESK2/KIF26B/PRKCA/DDX5/ATP1B1/ITM2C/DCLK2/HSPH1/MYO6/HSPA1B/GAK/PIK3C2A/CAMK2D/MYO1D/NAV2/RUNX1/ACTB/HSP90AA1/UBA1/ABCB1/ATP2B4/MYLK/PRPF4B/PFKFB3/PIK3C2B/BMPR1B/STK19/MAPK12/TNK2/DDX39A/TAOK3/HNRNPU/AASDH/ACVR1C/ATP8A1/PDE4B/CHD4/MYO9B/RTCB/MAT2A/DDX18/EPHB1/ABCA2/CHD1/LRRK2/RPS6KB2/UBE2G1/MAP3K5/CLCN7/DNAJA4/ATP13A1/CAMK2G/BMP2K/DYNC1LI2/TTLL3/MYO18A/MAP…	127
MF	GO:0032559	adenyl ribonucleotide binding	126/1089	470/5628	2.37044e-05	0.00234279	0.00210429	PEBP1/HSPA8/CKB/SIK3/HSPA1A/ERBB4/EPHA6/TESK2/KIF26B/PRKCA/DDX5/ATP1B1/ITM2C/DCLK2/HSPH1/MYO6/HSPA1B/GAK/PIK3C2A/CAMK2D/MYO1D/NAV2/RUNX1/ACTB/HSP90AA1/UBA1/ABCB1/ATP2B4/MYLK/PRPF4B/PFKFB3/PIK3C2B/BMPR1B/STK19/MAPK12/TNK2/DDX39A/TAOK3/HNRNPU/AASDH/ACVR1C/ATP8A1/PDE4B/CHD4/MYO9B/RTCB/MAT2A/DDX18/EPHB1/ABCA2/CHD1/LRRK2/RPS6KB2/UBE2G1/MAP3K5/CLCN7/DNAJA4/ATP13A1/CAMK2G/BMP2K/DYNC1LI2/TTLL3/MYO18A/MAP…	126
CC	GO:0044451	nucleoplasm part	100/1131	382/5894	0.000332716	0.00250062	0.00176235	SNRNP70/KAZN/HSPA1A/SON/TESK2/NCAM2/SRRM2/PHF10/MYO6/ZMIZ1/HSPA1B/PCBP1/KAT2A/NCOR2/SRSF2/SRRM1/LHPP/BCAS2/PSME4/ACTB/SF1/HDAC9/HNRNPM/SAFB2/PRPF4B/POLR2L/HP1BP3/ATF7IP/STK19/DDX39A/STAG1/HNRNPU/HNRNPA2B1/ELL2/WWTR1/SIRT2/CHD4/NONO/SQSTM1/DMAP1/MAU2/HDAC7/TMEM179B/THAP7/FAM107A/NSMCE2/ADD1/EPC1/BMP2K/CCNL2/POLR2F/NELFE/DTX1/EHMT1/SCN1A/CXXC1/RBM19/TENM2/CDK19/MAML2/SLTM/SRSF6/CCNL1/POLR2J/C12orf5…	100
CC	GO:0005905	clathrin-coated pit	15/1131	32/5894	0.000338067	0.00250062	0.00176235	DNM2/FNBP1/HIP1/MYO6/TF/LRP1/TFRC/TNK2/LDLR/ADCY8/REPS1/HIP1R/FCHO1/FCHSD2/EPS15	15
MF	GO:0005524	ATP binding	122/1089	455/5628	3.20466e-05	0.0027148	0.00243843	PEBP1/HSPA8/CKB/SIK3/HSPA1A/ERBB4/EPHA6/TESK2/KIF26B/PRKCA/DDX5/ATP1B1/ITM2C/DCLK2/HSPH1/MYO6/HSPA1B/GAK/PIK3C2A/CAMK2D/MYO1D/NAV2/RUNX1/ACTB/HSP90AA1/UBA1/ABCB1/ATP2B4/MYLK/PRPF4B/PFKFB3/PIK3C2B/BMPR1B/STK19/MAPK12/TNK2/DDX39A/TAOK3/HNRNPU/AASDH/ACVR1C/ATP8A1/CHD4/MYO9B/RTCB/MAT2A/DDX18/EPHB1/ABCA2/CHD1/LRRK2/RPS6KB2/UBE2G1/MAP3K5/CLCN7/DNAJA4/ATP13A1/CAMK2G/BMP2K/DYNC1LI2/TTLL3/MYO18A/MAPK4/ATM…	122
CC	GO:0099060	integral component of postsynaptic specialization membrane	11/1131	20/5894	0.000377351	0.00274759	0.00193641	NLGN1/KCND2/ERBB4/GRID2/SORCS3/DCC/CHRM3/GRID1/CDH10/LRRC4C/CLSTN2	11
BP	GO:0030900	forebrain development	57/1100	182/5658	7.04616e-05	0.00276153	0.00252765	CNTNAP2/ROBO2/NRG3/ERBB4/KIRREL3/UBB/ZEB2/NRGN/KCNC2/NFIB/DCLK2/NRG1/KAT2A/GNAO1/MYO1D/SLIT2/LRP1/ATP2B4/SRGAP2/NRP1/OPHN1/AGTPBP1/LRRK2/RBPJ/SLC1A2/SRGAP2C/PSEN1/FABP7/RFX4/POU3F2/DAB1/PRKG1/SLC8A1/CTNNB1/SZT2/B2M/C12orf57/DLC1/TNR/ZSWIM6/LRP6/BMPR1A/DNAJB1/FEZ1/YWHAE/XAB2/ID2/WNT7B/TACC1/SEMA5A/SUN2/ROBO1/BCAN/PLXNA3/PPARGC1A/DOCK7/BTBD3	57
BP	GO:0007156	homophilic cell adhesion via plasma membrane adhesion molecules	26/1100	64/5658	7.04706e-05	0.00276153	0.00252765	ROBO2/CNTN4/PCDH9/PCDH7/CDH12/CADM1/TENM3/PCDH11Y/KIRREL3/FAT3/SDK1/DSCAML1/PCDH15/CDH10/CDH9/PCDH17/CDH13/PALLD/PTPRT/DSCAM/PTPRM/CLSTN2/BSG/ROBO1/PLXNB2/PCDH11X	26
CC	GO:0005938	cell cortex	42/1131	133/5894	0.000385426	0.00276321	0.00194742	CFL1/CALD1/GRM7/FNBP1/PLA2G4C/HIP1/AKAP12/MYO6/MYO1D/EEF1A1/AKAP13/GNAI1/ACTB/ASTN2/SHROOM3/NSMF/MARCKS/CTTNBP2/COBL/GIPC1/PKD2/NEDD9/FGF1/MYO9B/EPB41L2/STXBP6/CTBP2/UNC13C/PFN1/PSEN1/ADD3/HIP1R/CTNNB1/DLC1/ENO1/TRAK1/RHOBTB3/PARD3B/AKT2/ITPR2/ACTN4/WDR1	42
BP	GO:0021953	central nervous system neuron differentiation	29/1100	75/5658	8.02979e-05	0.00311749	0.00285347	ROBO2/GABRB1/ERBB4/GRID2/UNC5D/UBB/ZEB2/NFIB/DCC/DCLK2/SLIT2/HSP90AA1/NRP1/OPHN1/AGTPBP1/EPHB1/MDGA2/PSEN1/RORA/CTNNB1/SZT2/B2M/C12orf57/SOX4/ZSWIM6/LRP6/SPOCK1/ROBO1/PLXNA3	29
CC	GO:0031967	organelle envelope	63/1131	222/5894	0.000466227	0.00314872	0.00221911	PRNP/NRXN1/GABRB1/RPS27A/RANBP17/CNR1/UBB/IFI27L2/NRGN/PLA2G4C/PRKCA/PNPLA7/MYO6/PPP2R2B/AGPAT4/MT3/S100A6/RAB40B/ANKZF1/TMBIM6/CLU/NSMF/NR4A1/NPC1/TNRC18/ANXA4/UBC/TAZ/NELL1/ROGDI/RTCB/PTGDS/LRRK2/THAP7/TIMM23B/MAD1L1/FOXO3/MCM3AP/SORL1/EPC1/PSEN1/INSR/TM7SF2/UBA52/DNAJB2/RPS3/SDCBP/LEMD2/RNF13/SLC27A1/TAF3/TRAK1/ACSL3/AGPAT3/UQCC3/ADAP2/STAT3/LPIN1/RNF5/STARD13/MYOF/SUN2/PHLPP1	63
CC	GO:0031975	envelope	63/1131	222/5894	0.000466227	0.00314872	0.00221911	PRNP/NRXN1/GABRB1/RPS27A/RANBP17/CNR1/UBB/IFI27L2/NRGN/PLA2G4C/PRKCA/PNPLA7/MYO6/PPP2R2B/AGPAT4/MT3/S100A6/RAB40B/ANKZF1/TMBIM6/CLU/NSMF/NR4A1/NPC1/TNRC18/ANXA4/UBC/TAZ/NELL1/ROGDI/RTCB/PTGDS/LRRK2/THAP7/TIMM23B/MAD1L1/FOXO3/MCM3AP/SORL1/EPC1/PSEN1/INSR/TM7SF2/UBA52/DNAJB2/RPS3/SDCBP/LEMD2/RNF13/SLC27A1/TAF3/TRAK1/ACSL3/AGPAT3/UQCC3/ADAP2/STAT3/LPIN1/RNF5/STARD13/MYOF/SUN2/PHLPP1	63
MF	GO:0030276	clathrin binding	13/1089	22/5628	4.32353e-05	0.00320482	0.00287856	SYT1/HIP1/GAK/DNAJC6/LRP1/LRRK2/TOM1L2/LDLR/AP1B1/SYT17/HIP1R/SYT11/SCLT1	13
BP	GO:1901699	cellular response to nitrogen compound	77/1100	266/5658	8.44249e-05	0.00324765	0.0029726	PRNP/CACNA2D1/GABRB1/RYR3/SORBS1/TSC2/COL16A1/DNM2/KCNC2/CHRM3/IGFBP5/PID1/PIK3C2A/IRS2/LAMTOR4/SLIT2/MT3/COL5A2/ACTB/APLP1/LRP1/ATP2B4/HDAC9/NSMF/CPEB2/NR4A1/ATF4/PKD2/CTNNA1/TGFB1/EGR1/PDE4B/RAB31/SIRT2/SYAP1/LAMTOR1/LRRK2/ZFP36L1/GPR173/MAP3K5/FOXO3/SORL1/SOX9/LAMTOR5/STXBP4/GAB1/HSPA5/SNX6/ADCY8/PSEN1/APRT/INSR/PTPRE/SLC8A1/CTNNB1/SOGA1/RPL23/RAPGEF1/SLC38A9/PDGFD/CYFIP1/ZCCHC3/KANK1/TBC1D4/H…	77
MF	GO:0019843	rRNA binding	14/1089	25/5628	4.97839e-05	0.00328021	0.00294628	CIRBP/RPL8/RPL37/RPS9/RPS18/RPS4X/RPS4Y1/RPL11/RPS13/RPL23A/RPS3/RPL23/RPS11/RPL12	14
BP	GO:0021537	telencephalon development	41/1100	120/5658	8.81801e-05	0.00336127	0.0030766	CNTNAP2/ROBO2/NRG3/ERBB4/KIRREL3/ZEB2/NRGN/NFIB/DCLK2/NRG1/KAT2A/SLIT2/LRP1/ATP2B4/SRGAP2/NRP1/AGTPBP1/LRRK2/SLC1A2/SRGAP2C/PSEN1/RFX4/POU3F2/DAB1/SLC8A1/CTNNB1/SZT2/C12orf57/TNR/ZSWIM6/LRP6/FEZ1/YWHAE/XAB2/ID2/TACC1/SUN2/ROBO1/BCAN/PLXNA3/BTBD3	41
BP	GO:0098693	regulation of synaptic vesicle cycle	16/1100	32/5658	9.59732e-05	0.00361931	0.00331279	SLC17A7/NRXN1/NLGN1/SYT1/CNR1/CACNB2/DNM3/PCDH17/FGF14/GIPC1/LRRK2/SYT11/CYFIP1/CSPG5/RAB5A/GRIN3A	16
BP	GO:0060996	dendritic spine development	15/1100	29/5658	9.66761e-05	0.00361931	0.00331279	CFL1/NLGN1/SDK1/DNM3/SRGAP2/SRCIN1/EPHB1/LRRK2/APOE/SRGAP2C/PSEN1/DOCK10/MEF2C/ADAM10/ZNF365	15
CC	GO:0044429	mitochondrial part	33/1131	99/5894	0.000547898	0.00364744	0.00257059	RPS27A/ERBB4/CNR1/UBB/IFI27L2/NRGN/PRKCA/PNPLA7/PPP2R2B/AGPAT4/MT3/PHYKPL/ANKZF1/TMBIM6/CLU/UBC/TAZ/LRRK2/TIMM23B/FOXO3/PSEN1/UBA52/RPS3/SLC27A1/TRAK1/ACSL3/UQCC3/ADAP2/STAT3/LPIN1/ACOT11/RNF5/STARD13	33
BP	GO:0001764	neuron migration	27/1100	69/5658	0.000110735	0.00410895	0.00376096	CCK/GPM6A/NRG3/ERBB4/UNC5D/KIRREL3/ACAP3/NAV1/DCC/NRG1/APBB2/SRGAP2/NSMF/NRP1/GPR173/SRGAP2C/PSEN1/DAB1/PRKG1/CTNNB1/SPOCK1/YWHAE/SDCCAG8/STAT3/NTN1/MEF2C/PLXNB2	27
BP	GO:0071417	cellular response to organonitrogen compound	72/1100	247/5658	0.000112832	0.00415005	0.00379858	PRNP/CACNA2D1/GABRB1/RYR3/SORBS1/TSC2/COL16A1/DNM2/IGFBP5/PID1/PIK3C2A/IRS2/LAMTOR4/SLIT2/COL5A2/ACTB/APLP1/LRP1/ATP2B4/HDAC9/NSMF/CPEB2/NR4A1/ATF4/PKD2/CTNNA1/TGFB1/EGR1/PDE4B/RAB31/SIRT2/SYAP1/LAMTOR1/LRRK2/ZFP36L1/GPR173/FOXO3/SORL1/SOX9/LAMTOR5/STXBP4/GAB1/HSPA5/SNX6/ADCY8/PSEN1/APRT/INSR/PTPRE/SLC8A1/CTNNB1/SOGA1/RPL23/RAPGEF1/SLC38A9/PDGFD/CYFIP1/KANK1/TBC1D4/HSF1/NOX4/STAT3/LPIN1/DENND4C/M…	72
BP	GO:0042026	protein refolding	11/1100	18/5658	0.0001182	0.00430969	0.0039447	SNRNP70/HSPA8/NKTR/HSPA1A/HSPA1B/HSP90AA1/PPIA/DNAJA4/HSPA5/DNAJB2/B2M	11
BP	GO:0120035	regulation of plasma membrane bounded cell projection organization	78/1100	273/5658	0.00012236	0.00442289	0.00404832	CSMD3/GPM6A/PRNP/CFL1/NLGN1/ROBO2/CAPZB/GRID2/ZNF804A/SYT1/PTPRD/TENM3/CNR1/ZEB2/LGALS1/DNM2/ACAP3/DCC/SEMA6D/ITM2C/GAK/CHN1/SDK1/IL1RAPL1/SLIT2/GRIP1/MT3/LRRC4C/LRP1/DNM3/IFRD1/PTPRG/NSMF/NRP1/COBL/UST/SRCIN1/DENND5A/IQGAP1/EVI5L/LRRK2/APOE/SYT17/DSCAM/SRGAP2C/HSPA5/PFN1/PSEN1/POU3F2/DAB1/ZSWIM8/TENM2/CIB1/B2M/RAPGEF1/MAP4/TNIK/STK11/TNR/ZSWIM6/CYFIP1/KANK1/TRAK1/FEZ1/ANAPC2/SPOCK1/SDCCAG8/SEMA3…	78
BP	GO:0050773	regulation of dendrite development	22/1100	52/5658	0.000123589	0.00442912	0.00405402	CSMD3/CFL1/NLGN1/PTPRD/DCC/SDK1/IL1RAPL1/DNM3/NSMF/COBL/SRCIN1/IQGAP1/LRRK2/APOE/SRGAP2C/PSEN1/TNIK/STK11/CYFIP1/ANAPC2/MEF2C/ADAM10	22
BP	GO:1990138	neuron projection extension	24/1100	59/5658	0.000129761	0.00457217	0.00418495	SYT1/DNM2/SEMA6D/SLIT2/MT3/HSP90AA1/ALCAM/LRP1/IFRD1/SPG11/NRP1/IQGAP1/APOE/SYT17/DSCAM/CTNNB1/STK11/TNR/CYFIP1/ANAPC2/SEMA3E/NTN1/SEMA5A/PLXNA3	24
CC	GO:0044304	main axon	15/1131	34/5894	0.000754469	0.00495187	0.00348991	CCK/CNTNAP2/TUBB4A/ROBO2/KCNC2/NAV1/KCNAB1/MYO1D/SIRT2/SLC1A2/SCN1A/MBP/SPOCK1/KIF13B/IQCJ-SCHIP1	15
CC	GO:0005681	spliceosomal complex	26/1131	74/5894	0.00085544	0.0055366	0.00390201	CIRBP/SNRNP70/HSPA8/SRRM2/DDX5/LSM7/SRSF2/SRRM1/BCAS2/SF1/HNRNPM/PRPF4B/HNRNPK/HNRNPU/HNRNPA2B1/RBMX/PRPF38B/LSM2/HNRNPA3/SNRPD2/PRPF6/RBM22/PRPF3/XAB2/SF3B1/SF3B5	26
BP	GO:0106027	neuron projection organization	14/1100	27/5658	0.000160164	0.00559641	0.00512245	PRNP/CFL1/NLGN1/ZNF804A/DNM3/SRCIN1/EPHB1/LRRK2/APOE/PSEN1/INSR/DOCK10/ADAM10/ZNF365	14
BP	GO:0031344	regulation of cell projection organization	79/1100	280/5658	0.000174192	0.00598676	0.00547974	CSMD3/GPM6A/PRNP/CFL1/NLGN1/ROBO2/CAPZB/GRID2/ZNF804A/SYT1/PTPRD/TENM3/CNR1/ZEB2/LGALS1/DNM2/ACAP3/DCC/SEMA6D/ITM2C/GAK/CHN1/KAT2A/SDK1/IL1RAPL1/SLIT2/GRIP1/MT3/LRRC4C/LRP1/DNM3/IFRD1/PTPRG/NSMF/NRP1/COBL/UST/SRCIN1/DENND5A/IQGAP1/EVI5L/LRRK2/APOE/SYT17/DSCAM/SRGAP2C/HSPA5/PFN1/PSEN1/POU3F2/DAB1/ZSWIM8/TENM2/CIB1/B2M/RAPGEF1/MAP4/TNIK/STK11/TNR/ZSWIM6/CYFIP1/KANK1/TRAK1/FEZ1/ANAPC2/SPOCK1/SDCCAG8…	79
BP	GO:0051129	negative regulation of cellular component organization	79/1100	280/5658	0.000174192	0.00598676	0.00547974	PRNP/TMSB4X/TUBB4A/NLGN1/ROBO2/HSPA8/TMSB10/HSPA1A/LDLRAD4/STMN1/CAPZB/TSC2/LGALS1/DNM2/TMEFF2/DCC/SEMA6D/ITM2C/HSPA1B/GAK/KAT2A/SLIT2/MT3/LRP1/DNM3/IFRD1/CLU/CRYAB/PTPRG/CDK5RAP2/NRP1/EML2/APC2/HNRNPU/TGFB1/SIRT2/DENND5A/EVI5L/LRRK2/TOM1L2/FAM107A/LDLR/SH3GL3/MAD1L1/DNAJA4/APOE/ADD1/SORL1/ATM/SRGAP2C/PFN1/PSEN1/ADD3/HIP1R/DAB1/PPFIA1/DNAJB2/SYT11/CIB1/B2M/SDCBP/DLC1/MAP4/TNR/DNAJB1/KANK1/TBC1D4/…	79
CC	GO:0043204	perikaryon	18/1131	45/5894	0.000958357	0.00603506	0.00425331	CCK/CNTNAP2/KCND2/KCNC2/FUS/KCNAB1/MYO1D/PAM/ASTN2/CRYAB/NSMF/GRIK2/SIRT2/ROGDI/SYAP1/KLHL24/LRRK2/PENK	18
CC	GO:0098948	intrinsic component of postsynaptic specialization membrane	11/1131	22/5894	0.00108656	0.00667722	0.00470588	NLGN1/KCND2/ERBB4/GRID2/SORCS3/DCC/CHRM3/GRID1/CDH10/LRRC4C/CLSTN2	11
CC	GO:0016604	nuclear body	76/1131	286/5894	0.00108899	0.00667722	0.00470588	SNRNP70/KAZN/HSPA1A/SON/TESK2/NCAM2/SRRM2/ZMIZ1/HSPA1B/PCBP1/NCOR2/SRSF2/SRRM1/LHPP/BCAS2/PSME4/SF1/HNRNPM/SAFB2/PRPF4B/HP1BP3/ATF7IP/STK19/DDX39A/STAG1/HNRNPU/HNRNPA2B1/WWTR1/NONO/SQSTM1/MAU2/TMEM179B/THAP7/FAM107A/NSMCE2/ADD1/BMP2K/CCNL2/NELFE/DTX1/EHMT1/SCN1A/CXXC1/RBM19/TENM2/MAML2/SLTM/SRSF6/CCNL1/C12orf57/SBF1/RBM4B/NEAT1/PRPF6/PRPF3/USPL1/HSF1/KIF2A/SMURF2/SRP54/YTHDC1/MAML3/ELF2/NRIP1/ITP…	76
BP	GO:0010721	negative regulation of cell development	51/1100	164/5658	0.00020441	0.00685673	0.00627603	NLGN1/CNTN4/NRG3/ERBB4/LGALS1/DCC/SEMA6D/ITM2C/GAK/NRG1/SLIT2/MT3/LRP1/DNM3/IFRD1/SRGAP2/PTPRG/CDK5RAP2/NRP1/CTNNA1/TGFB1/SIRT2/DENND5A/LRRK2/GPR173/LDLR/FOXO3/APOE/SORL1/SOX9/SRGAP2C/DTX1/PSEN1/DAB1/CTNNB1/CIB1/B2M/TNR/ZNF536/BMPR1A/KANK1/SPOCK1/DICER1/SEMA3E/ID2/STAT3/NTN1/SEMA5A/PLXNA3/ZNF365/ACTN4	51
BP	GO:0010243	response to organonitrogen compound	108/1100	409/5658	0.000221696	0.00737754	0.00675273	PRNP/CFL1/JUND/CACNA2D1/GABRB1/RYR3/SORBS1/TSC2/COL16A1/CNR1/DNM2/KCNC2/IGFBP5/PID1/PIK3C2A/NCOR2/SDK1/GNAO1/IRS2/LAMTOR4/SLIT2/UBXN1/HMGCS1/COL5A2/GNAI1/ACTB/APLP1/LRP1/FOSB/ATP2B4/ANKZF1/HDAC9/CDH13/TMBIM6/PER1/SREBF2/NSMF/CPEB2/NR4A1/NPC1/ATF4/SST/PKD2/CTNNA1/TGFB1/ACVR1C/EGR1/PDE4B/RAB31/SIRT2/OS9/SYAP1/SEL1L/LAMTOR1/IQGAP1/LRRK2/ZFP36L1/GPR173/JUNB/LDLR/FOXO3/APOE/SORL1/TMEM259/SLC1A2/SOX9/L…	108
BP	GO:0022618	ribonucleoprotein complex assembly	32/1100	90/5658	0.000225318	0.00743904	0.00680903	RPS15/CIRBP/CELF2/RPL38/HSP90AA1/RPS23/SF1/RPL24/RPS28/EIF2S2/RPS19/RPL11/RPL10/EIF3G/RBMX/ATM/SFSWAP/RPSA/RPL23A/SNRPD2/SRSF6/PRPF6/PRPF3/CNOT2/XAB2/YTHDC1/DICER1/CNOT1/SF3B1/SCAF11/RPL12/EIF3E	32
BP	GO:0099175	regulation of postsynapse organization	16/1100	34/5658	0.000237442	0.00777807	0.00711935	PRNP/NRXN1/CFL1/NLGN1/GRID2/ZNF804A/PTPRD/IL1RAPL1/DNM3/ARHGAP22/SRCIN1/LRRK2/APOE/DGKB/ADAM10/IL1RAP	16
CC	GO:0005730	nucleolus	80/1131	307/5894	0.00150362	0.00904031	0.0063713	CIRBP/NRXN1/RPL13/HSPA8/RPS27A/RPL18/RPS6/ZEB2/RGS12/DOCK4/RPS9/NFIB/EDF1/DDX5/UPF3B/ACAT2/EEF1A1/BCAS2/CDK5RAP3/NOVA1/RNF213/TTF1/PCGF5/GNAI1/UPF3A/C19orf53/CDC14B/PPM1B/RPL35/NFIC/HNRNPM/POLR2L/RPS25/ZFX/SPG11/RPS19/RPL11/DIAPH2/FGF1/SIRT2/NONO/RPL36/AGTPBP1/MXI1/ZMAT3/CSTB/DDX18/CHD1/ARL4A/TMEM179B/ADARB2/EEF1D/RBPJ/ATM/POLR2F/PTBP1/RBM19/RPS13/RPL23A/CTSB/RPS3/RPL23/RBM4B/RPS11/DNAJB1/MAP3K14…	80
CC	GO:0031252	cell leading edge	53/1131	188/5894	0.00151318	0.00904031	0.0063713	CNTNAP2/CFL1/ROBO2/DNM2/KCNC2/PTPRK/MYO6/APBB2/GABRA2/MYO1D/EEF1A1/S100A6/MYLK/SRGAP2/UNC5C/ARHGEF4/ATF4/SNTG1/COBL/APC2/ABLIM1/PKD2/CTNNA1/NEDD9/SRCIN1/FRMD4B/PALLD/IQGAP1/CTNNA3/FAM107A/SLC1A2/WWC1/PTPRM/STX4/PSD3/HIP1R/ABI1/INSR/CTNNB1/WASH3P/CIB1/RPS3/FGD6/DLC1/AMOTL1/CYFIP1/KANK1/PLCG1/PHACTR4/PTPRJ/MTSS1/AKT2/RAB5A	53
[truncated: 144 more rows]

## Sheet: L4
ONTOLOGY	ID	Description	GeneRatio	BgRatio	pvalue	p.adjust	qvalue	geneID	Count
[truncated: 785 more rows]

## Sheet: L5_6-CC
ONTOLOGY	ID	Description	GeneRatio	BgRatio	pvalue	p.adjust	qvalue	geneID	Count
[truncated: 367 more rows]
